# Supplementary material for: Expression-based analyses indicate a central role for hypoxia in driving tumor plasticity through microenvironment remodeling and chromosomal instability
Source: PubMed Central journal article supplement (PMC6200725; doi:10.1038/s41540-018-0074-z), 2018-10-24
Supplement: 41540_2018_74_MOESM1_ESM.pdf [file 41540_2018_74_MOESM1_ESM.pdf]

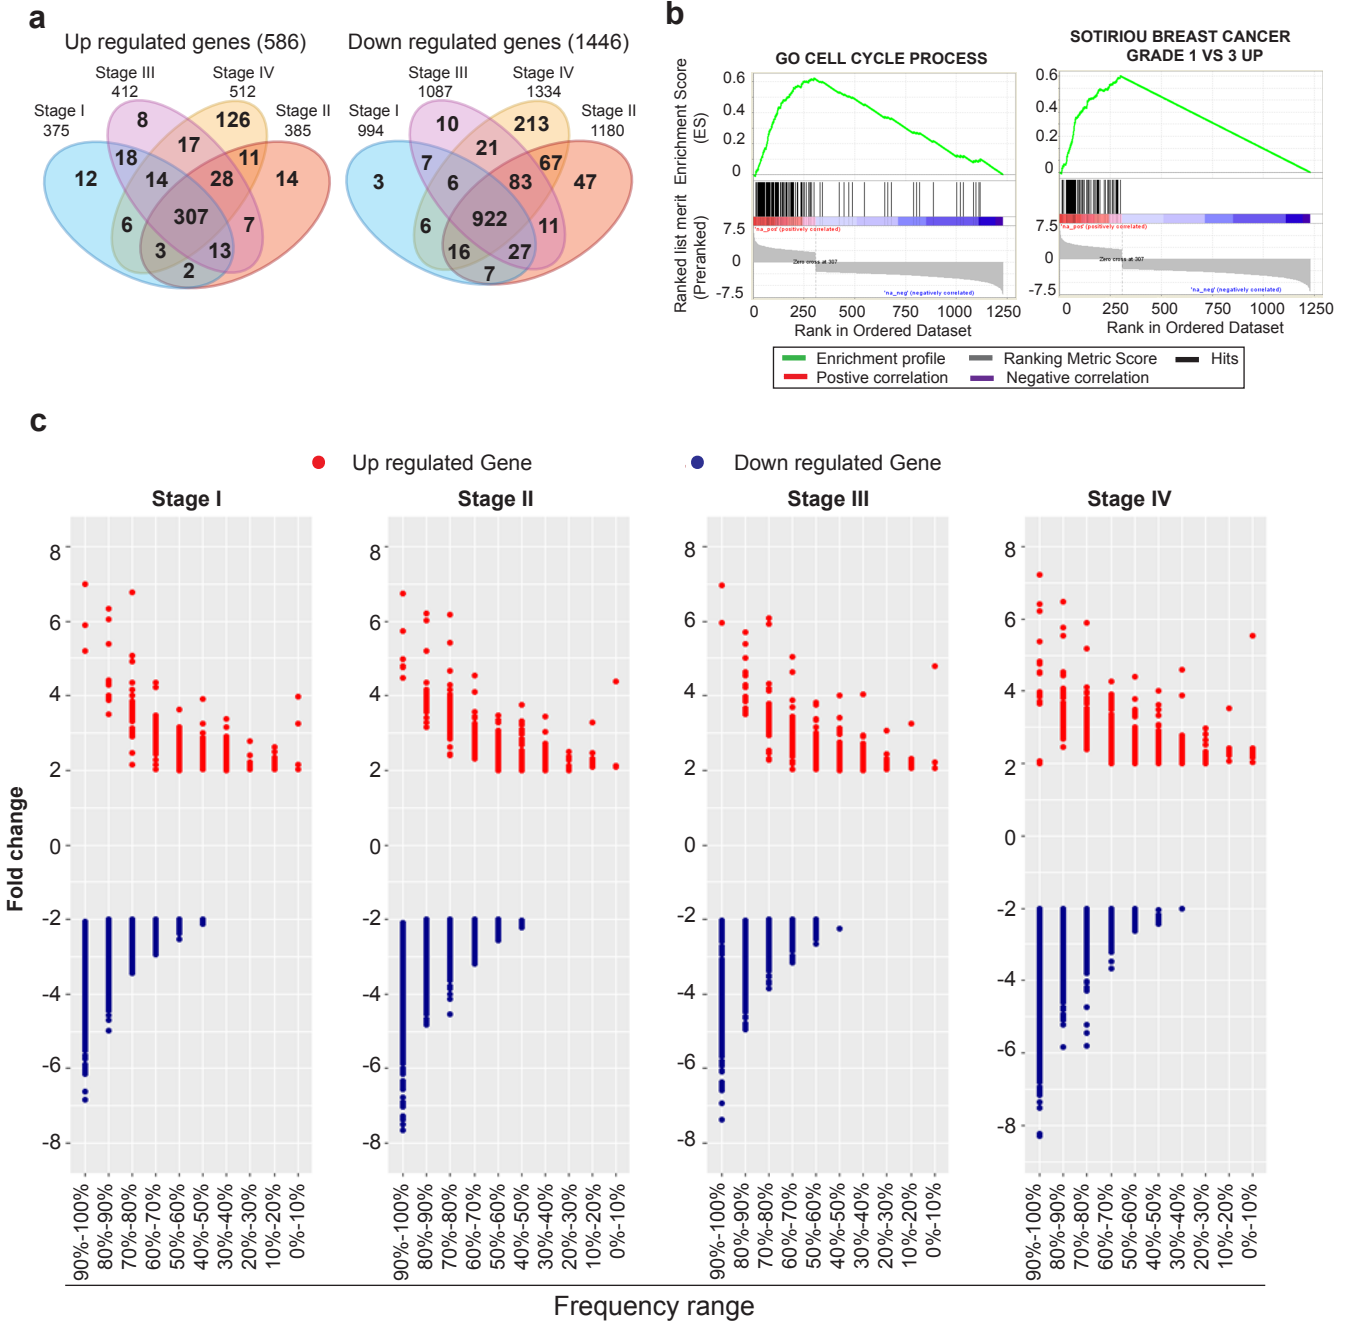

**a**

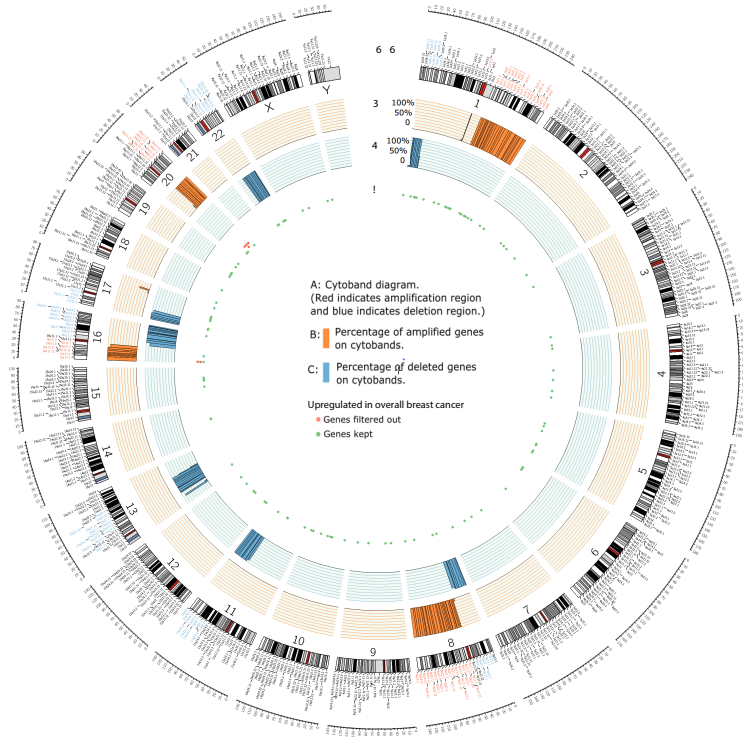

**b**

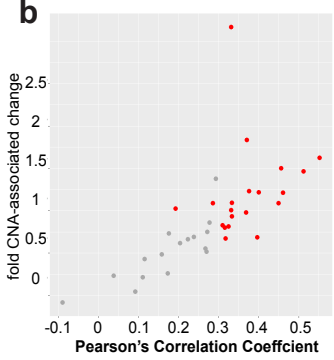

**c**

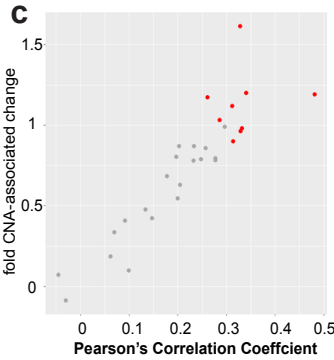

**d**

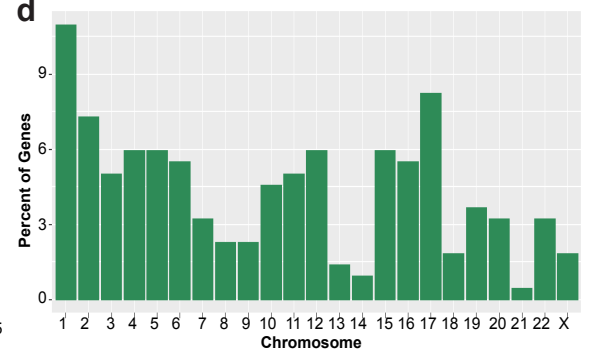

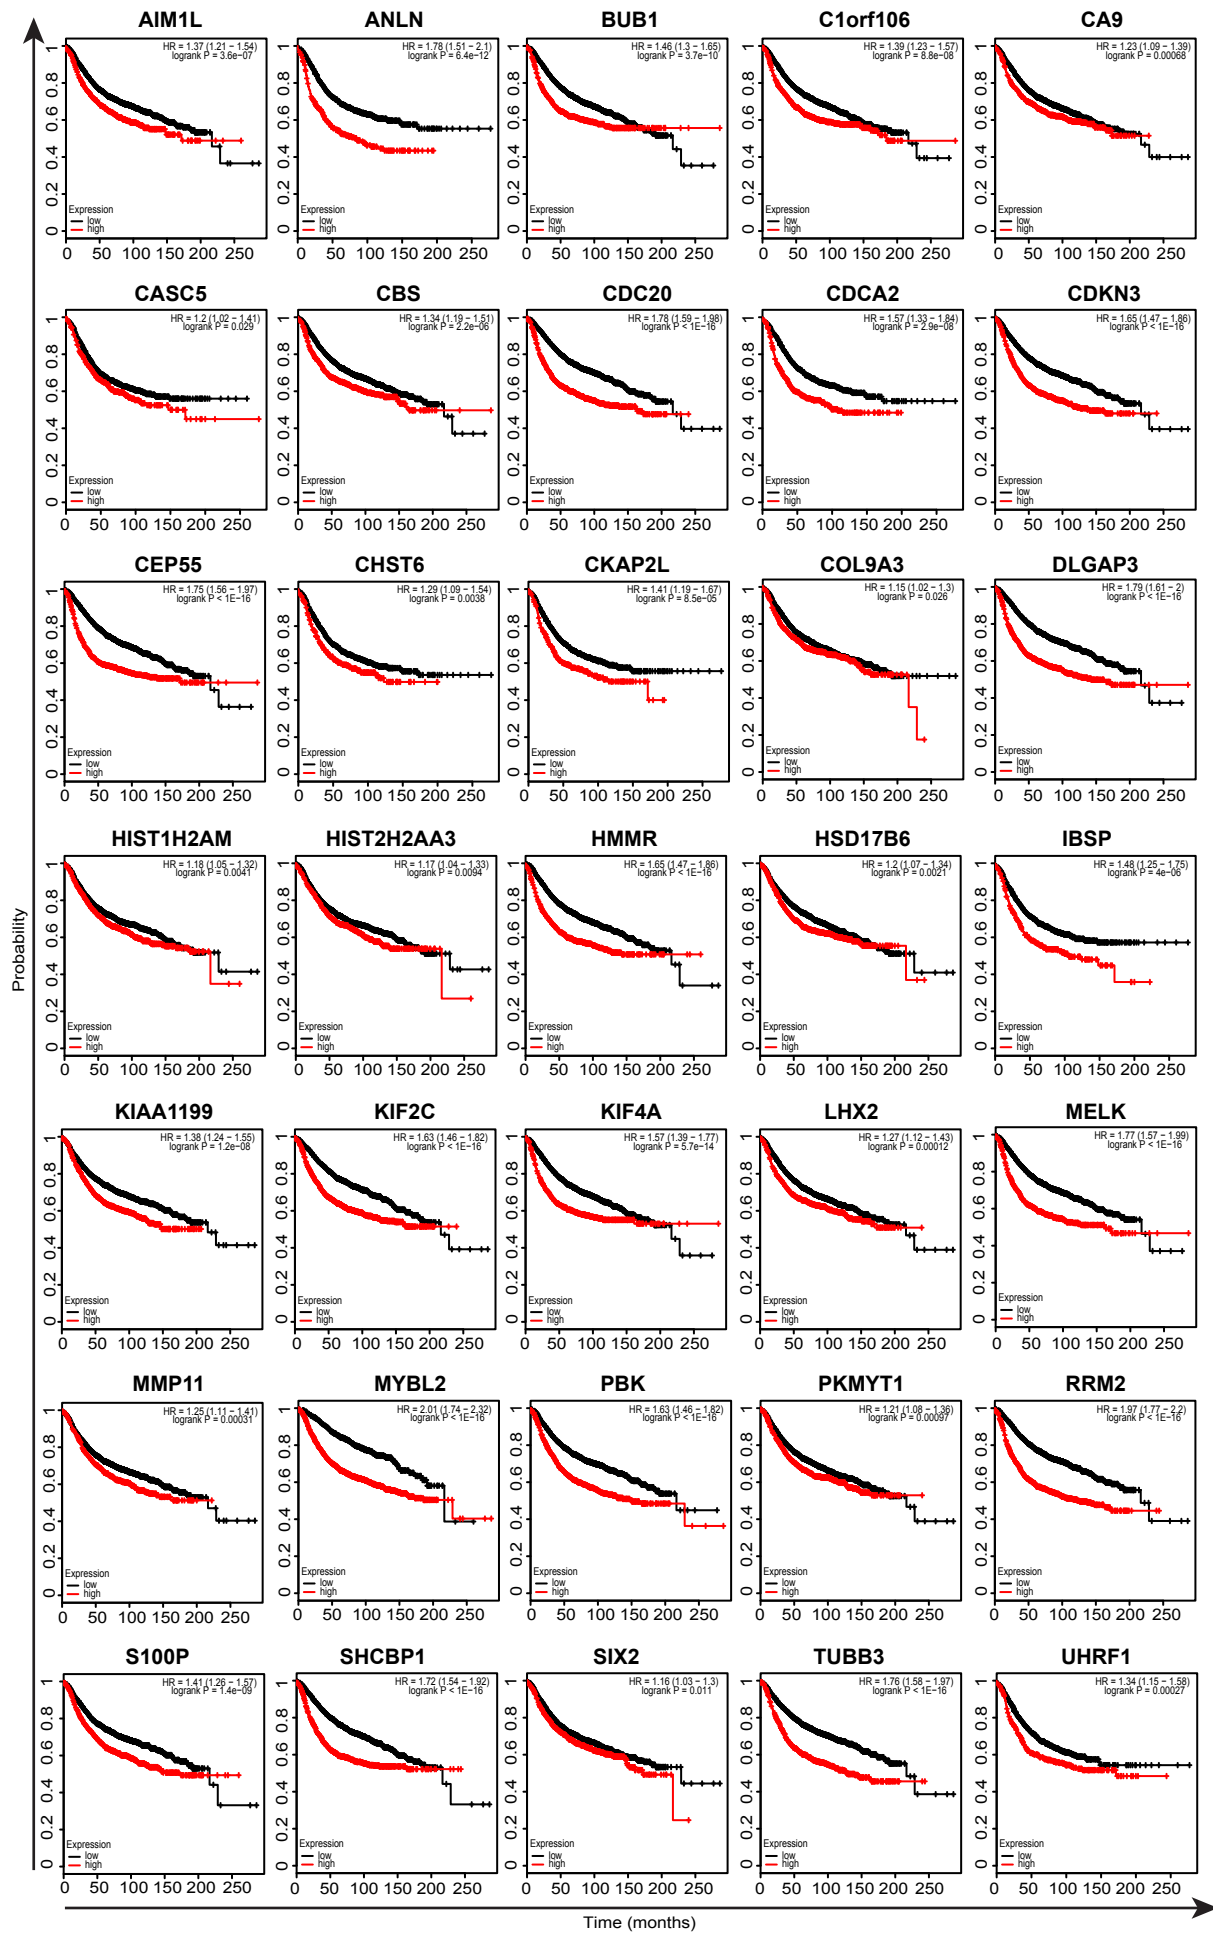

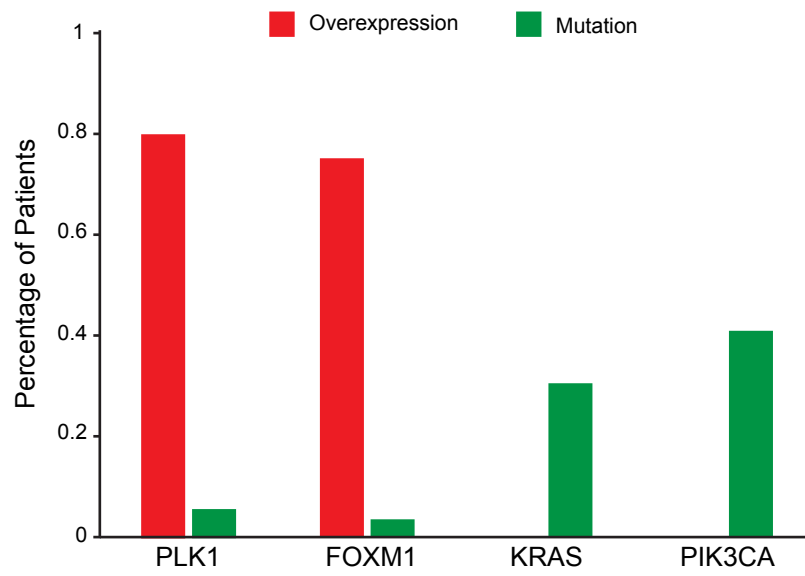

## SUPPLEMENTARY FIGURE LEGENDS:

**Supplementary Figure 1: Identification of up-regulated genes in overall breast cancer.** (a) Venn diagram of differentially expressed genes in overall (top) and ER+ patients (bottom) respectively. (b) Gene set enrichment analysis for up/down-regulated genes across all tumor stages. It shows the Gene Set Enrichment Analysis for 307 up-regulated genes (left) and 922 down-regulated genes (right) across four tumor stages along with previously identified, differentially up-regulated genes from Sotiriou et al <sup>29</sup>. (c) Frequency distribution of differential expression in overall patients. This plot represents the fold change and the frequency range of stage-specific differentially expressed genes, where the red denotes up-regulated gene and the blue denotes down-regulated gene.

**Supplementary Figure 2: Expression pattern of up-regulated genes.** (a) Amplified chromosome cytobands and up-regulated genes locus. Track A displays the cytoband diagram where the texts in red indicate identified amplified regions. Track B and C displays the frequency of genes showing amplification and deletion respectively at least in 40% of patients in each cytoband. Genes in supplementary figure 2a were mapped to the Track D. (b and c) The evaluation on the concordance between gene expression and amplification. Nodes represent up-regulated genes in overall breast cancer cases in amplified regions, showing Pearson's correlation coefficient and fold CNA-associated change. Genes in red were considered driven by copy number amplification either in overall breast cancer (B) or in TNBC (C). (d) Distribution of the 219 up-regulated events according to their chromosomal location.

**Supplementary Figure 3:** Relapse free survival plot in breast cancer patients having low and high expression of cluster 1 genes.

**Supplementary Figure 4:** Percentage of patients that either overexpress or carry mutations in some of the key cancer genes.

Supplementary Table 1a. Up/down regulated genes in overall patients

| UpRegulatedGenes |        | DownRegulatedGenes |        |
|------------------|--------|--------------------|--------|
| GeneName         | GeneID | GeneName           | GeneID |
| COL10A1          | 1300   | FHL1               | 2273   |
| MMP11            | 4320   | GLYAT              | 10249  |
| PPAPDC1A         | 196051 | PYGM               | 5837   |
| IBSP             | 3381   | TRDN               | 10345  |
| NEK2             | 4751   | MYH1               | 4619   |
| HSD17B6          | 8630   | TNNT3              | 7140   |
| KIF4A            | 24137  | FIGF               | 2277   |
| GABRD            | 2563   | MYOM1              | 8736   |
| COL11A1          | 1301   | MYOC               | 4653   |
| PKMYT1           | 9088   | LEP                | 3952   |
| BMP8A            | 353500 | HSPB7              | 27129  |
| KIAA0101         | 9768   | DEFB132            | 400830 |
| UBE2T            | 29089  | DES                | 1674   |
| NUF2             | 83540  | AMPD1              | 270    |
| MMP13            | 4322   | LOC283392          | 283392 |
| CDK1             | 983    | ACVR1C             | 130399 |
| IQGAP3           | 128239 | KIAA0408           | 9729   |
| CDC25C           | 995    | CA3                | 761    |
| CKS2             | 1164   | OXTR               | 5021   |
| TPX2             | 22974  | GYS2               | 2998   |
| UHRF1            | 29128  | GPAM               | 57678  |
| ASF1B            | 55723  | APOB               | 338    |
| UBE2C            | 11065  | GLRA4              | 441509 |
| SPC25            | 57405  | LHCGR              | 3973   |
| HJURP            | 55355  | ADH1B              | 125    |
| PAFAH1B3         | 5050   | C12orf39           | 80763  |
| PLK1             | 5347   | SMYD1              | 150572 |
| TK1              | 7083   | LOC729467          | 729467 |
| PAQR4            | 124222 | MYOM2              | 9172   |
| NUSAP1           | 51203  | LYVE1              | 10894  |
| WISP1            | 8840   | ADRA1A             | 148    |
| CST1             | 1469   | SLC2A4             | 6517   |
| NUAK2            | 81788  | HEPACAM            | 220296 |
| CDKN3            | 1033   | AQP7P1             | 375719 |
| CCNB1            | 891    | CKMT2              | 1160   |
| ESM1             | 11082  | KCNIP2             | 30819  |
| COMP             | 1311   | ADH1A              | 124    |
| TROAP            | 10024  | AQPEP              | 206338 |
| CEP55            | 55165  | AQP7P3             | 441432 |
| CCL11            | 6356   | GPD1               | 2819   |
| GPRIN1           | 114787 | SLC19A3            | 80704  |
| NDC80            | 10403  | HBB                | 3043   |
| PROC             | 5624   | HBA2               | 3040   |
| AURKA            | 6790   | ADIPOQ             | 9370   |
| HMMR             | 3161   | CSN1S1             | 1446   |
| HAGHL            | 84264  | LALBA              | 3906   |
| CILP2            | 148113 | CPA1               | 1357   |

|           |        |           |        |
|-----------|--------|-----------|--------|
| WDR62     | 284403 | CA4       | 762    |
| KIF20A    | 10112  | CD300LG   | 146894 |
| MELK      | 9833   | SCARA5    | 286133 |
| LOC283867 | 283867 | LPL       | 4023   |
| ZWINT     | 11130  | AQP7      | 364    |
| OIP5      | 11339  | ADH4      | 127    |
| PTTG1     | 9232   | KLB       | 152831 |
| ADAMTS14  | 140766 | PLIN1     | 5346   |
| CLEC5A    | 23601  | PLIN4     | 729359 |
| CDCA8     | 55143  | FRMD1     | 79981  |
| KIF2C     | 11004  | GYG2      | 8908   |
| NCAPG     | 64151  | SLC7A10   | 56301  |
| PYCR1     | 5831   | TUSC5     | 286753 |
| KIF18B    | 146909 | PCK1      | 5105   |
| GJB2      | 2706   | ANGPTL5   | 253935 |
| TACC3     | 10460  | HBA1      | 3039   |
| BGN       | 633    | GLP2R     | 9340   |
| C16orf59  | 80178  | HHATL     | 57467  |
| BUB1B     | 701    | SDPR      | 8436   |
| RPLP0P2   | 113157 | LRRC2     | 79442  |
| FOXM1     | 2305   | ATP1A2    | 477    |
| DLGAP5    | 9787   | HEPN1     | 641654 |
| RRM2      | 6241   | AOC3      | 8639   |
| BUB1      | 699    | ALDH1L1   | 10840  |
| PBK       | 55872  | RDH5      | 5959   |
| SPAG5     | 10615  | LIPE      | 3991   |
| CHRNA6    | 8973   | C14orf180 | 400258 |
| SKA3      | 221150 | RBP4      | 5950   |
| TDO2      | 6999   | CIDEC     | 63924  |
| SKA1      | 220134 | MRAP      | 56246  |
| KIFC1     | 3833   | LOC55908  | 55908  |
| RAD51     | 5888   | LGALS12   | 85329  |
| CCNB2     | 9133   | EPB42     | 2038   |
| TOP2A     | 7153   | SLC22A12  | 116085 |
| CCDC64    | 92558  | HSD17B13  | 345275 |
| CKAP2L    | 150468 | TNMD      | 64102  |
| GTSE1     | 51512  | HSPB6     | 126393 |
| ANLN      | 54443  | SORBS1    | 10580  |
| DTL       | 51514  | FAM180B   | 399888 |
| NEIL3     | 55247  | CRHBP     | 1393   |
| EXO1      | 9156   | CES1      | 1066   |
| CDCA5     | 113130 | GSTM5     | 2949   |
| ASPM      | 259266 | BMP3      | 651    |
| CDC20     | 991    | PRRT4     | 401399 |
| UBE2S     | 27338  | TRHDE     | 29953  |
| CDCA3     | 83461  | HPD       | 3242   |
| SAMD14    | 201191 | HSD3B2    | 3284   |
| SPC24     | 147841 | LOC572558 | 572558 |
| RAD54L    | 8438   | ANGPT4    | 51378  |
| EPR1      | 8475   | KCNJ16    | 3773   |



|           |        |          |           |
|-----------|--------|----------|-----------|
| C16orf75  | 116028 | ACACB    | 32        |
| CCNE2     | 9134   | CHRD1    | 91851     |
| INHBA     | 3624   | TMEM132C | 92293     |
| CENPF     | 1063   | C13orf36 | 400120    |
| ERCC6L    | 54821  | RXRG     | 6258      |
| TLCD1     | 116238 | KLHL31   | 401265    |
| RECQL4    | 9401   | PFKFB1   | 5207      |
| KIF23     | 9493   | ABCD2    | 225       |
| BIRC5     | 332    | CIDEA    | 1149      |
| CENPM     | 79019  | GPR144   | 347088    |
| PRC1      | 9055   | PDE3B    | 5140      |
| KIF14     | 9928   | LRRC3B   | 116135    |
| LMNB1     | 4001   | BTNL9    | 153579    |
| AURKB     | 9212   | ITIH5    | 80760     |
| KIF11     | 3832   | MESTIT1  | 317751    |
| NCAPH     | 23397  | NAALAD2  | 10003     |
| FAM83D    | 81610  | ACSM5    | 54988     |
| FAM54A    | 113115 | PCOLCE2  | 26577     |
| DEPDC1B   | 55789  | CASQ2    | 845       |
| SLC24A2   | 25769  | GOS2     | 50486     |
| EZH2      | 2146   | ALB      | 213       |
| GRM8      | 2918   | MME      | 4311      |
| CTHRC1    | 115908 | NPR1     | 4881      |
| CST2      | 1470   | TRPM3    | 80036     |
| CCNA2     | 890    | ANGPTL7  | 10218     |
| MKI67     | 4288   | SCN4A    | 6329      |
| CTXN1     | 404217 | PCDH9    | 5101      |
| KIF26B    | 55083  | ITGA7    | 3679      |
| FN1       | 2335   | PAPPA2   | 60676     |
| CENPA     | 1058   | KLHL33   | 123103    |
| SHCBP1    | 79801  | FABP4    | 2167      |
| CNIH2     | 254263 | KCNA4    | 3739      |
| PLAC1     | 10761  | PGA3     | 643834    |
| CDC45     | 8318   | SEL1L2   | 80343     |
| KIF15     | 56992  | GABRA4   | 2557      |
| SGOL1     | 151648 | PENK     | 5179      |
| P4HA3     | 283208 | CYP1A1   | 1543      |
| GINS1     | 9837   | CSN3     | 1448      |
| LRRC15    | 131578 | ADAMTS5  | 11096     |
| DEPDC1    | 55635  | CLEC3B   | 7123      |
| SCT       | 6343   | SVEP1    | 79987     |
| ESCO2     | 157570 | MAP1LC3C | 440738    |
| ESPL1     | 9700   | PKHD1L1  | 93035     |
| HIST1H2AM | 8336   | NPY2R    | 4887      |
| EME1      | 146956 | FAM196B  | 100131897 |
| KIAA1199  | 57214  | CDH20    | 28316     |
| MYBL2     | 4605   | MYBPC1   | 4604      |
| MMP1      | 4312   | TNS1     | 7145      |
| PACSIN1   | 29993  | B3GALT1  | 8708      |
| EPYC      | 1833   | MASP1    | 5648      |

|            |        |           |        |
|------------|--------|-----------|--------|
| PPEF1      | 5475   | ABCA9     | 10350  |
| C20orf103  | 24141  | PDK4      | 5166   |
| CDC6       | 990    | GDF10     | 2662   |
| E2F8       | 79733  | CDO1      | 1036   |
| E2F1       | 1869   | CD36      | 948    |
| CENPE      | 1062   | GPX3      | 2878   |
| SDS        | 10993  | SPHKAP    | 80309  |
| SALL4      | 57167  | SAA2      | 6289   |
| FAM64A     | 54478  | ALDH3A1   | 218    |
| MFAP2      | 4237   | CLDN19    | 149461 |
| HIST2H2AA3 | 8337   | SGCG      | 6445   |
| MARCH4     | 57574  | PROKR1    | 10887  |
| CCDC19     | 25790  | CSF3      | 1440   |
| GRM4       | 2914   | DMD       | 1756   |
| SLC16A3    | 9123   | FXD1      | 5348   |
| FAM111B    | 374393 | LOC728264 | 728264 |
| TTK        | 7272   | TNXB      | 7148   |
| POLQ       | 10721  | KLF15     | 28999  |
| HCN2       | 610    | ASPA      | 443    |
| MATN3      | 4148   | ABCB5     | 340273 |
| RHPN1      | 114822 | ACADL     | 33     |
| TMEM90B    | 79953  | ABCA8     | 10351  |
| MCM10      | 55388  | GPR109A   | 338442 |
| KIF18A     | 81930  | KY        | 339855 |
| AIM1L      | 55057  | PLXNA4    | 91584  |
| RDM1       | 201299 | SGK2      | 10110  |
| CST4       | 1472   | SLC16A7   | 9194   |
| E2F7       | 144455 | OVCH2     | 341277 |
| HIST1H3H   | 8357   | DLK1      | 8788   |
| CCDC78     | 124093 | LOC93432  | 93432  |
| SBK1       | 388228 | KIAA1239  | 57495  |
| CDCA2      | 157313 | HIF3A     | 64344  |
| TUBB3      | 10381  | EBF1      | 1879   |
| RAB26      | 25837  | GPIHBP1   | 338328 |
| ADAM8      | 101    | FMO2      | 2327   |
| CLSPN      | 63967  | IGSF10    | 285313 |
| GPRC5A     | 9052   | STAB2     | 55576  |
| TFR2       | 7036   | GCOM1     | 145781 |
| HES6       | 55502  | NMUR1     | 10316  |
| HIST1H2BO  | 8348   | NNAT      | 4826   |
| FAM72D     | 728833 | TIMP4     | 7079   |
| HIST1H2BD  | 3017   | CLCA4     | 22802  |
| ORC6L      | 23594  | FGFBP2    | 83888  |
| CDT1       | 81620  | AADAC     | 13     |
| OLR1       | 4973   | ITIH2     | 3698   |
| KIAA1211   | 57482  | CAV1      | 857    |
| MND1       | 84057  | RYR3      | 6263   |
| PITX1      | 5307   | ABCA10    | 10349  |
| E2F2       | 1870   | HPSE2     | 60495  |
| S100P      | 6286   | DPP6      | 1804   |

|           |        |              |           |
|-----------|--------|--------------|-----------|
| HIST2H3C  | 126961 | AKR1C1       | 1645      |
| FAM72A    | 729533 | PPP1R1A      | 5502      |
| TNFRSF18  | 8784   | DCT          | 1638      |
| ITPKA     | 3706   | SAA1         | 6288      |
| KREMEN2   | 79412  | CLEC4G       | 339390    |
| ISG15     | 9636   | DPT          | 1805      |
| DPEP1     | 1800   | MMD          | 23531     |
| CASC5     | 57082  | SLCO1A2      | 6579      |
| IGFL2     | 147920 | IGFBP1       | 3484      |
| CAMK2N2   | 94032  | PROL1        | 58503     |
| WBSCR28   | 135886 | NTS          | 4922      |
| HIST1H3D  | 8351   | SLC17A7      | 57030     |
| HTR1D     | 3352   | MYH11        | 4629      |
| METRN     | 79006  | ANGPTL1      | 9068      |
| ADM2      | 79924  | TMEM100      | 55273     |
| IL4I1     | 259307 | GRIA4        | 2893      |
| HIST1H2BH | 8345   | PKD1L2       | 114780    |
| F12       | 2161   | BHMT2        | 23743     |
| SYNGR3    | 9143   | MRGPRX2      | 117194    |
| ORC1L     | 4998   | DGAT2        | 84649     |
| COL1A1    | 1277   | PRG4         | 10216     |
| OR2B6     | 26212  | PAMR1        | 25891     |
| NKX3-2    | 579    | ATOH8        | 84913     |
| IL21R     | 50615  | KCNB1        | 3745      |
| FBN2      | 2201   | PPARG        | 5468      |
| ZNF695    | 57116  | GHR          | 2690      |
| C9orf169  | 375791 | CNN1         | 1264      |
| HAPLN1    | 1404   | CLEC4GP1     | 440508    |
| C9orf140  | 89958  | ANGPT1       | 284       |
| ARTN      | 9048   | P2RX6        | 9127      |
| ACAN      | 176    | CYP3A4       | 1576      |
| RAMP1     | 10267  | RNF186       | 54546     |
| TMEM145   | 284339 | SLC7A3       | 84889     |
| CAMP      | 820    | DSC1         | 1823      |
| C19orf21  | 126353 | RPE65        | 6121      |
| DSCR6     | 53820  | AQP4         | 361       |
| NKAIN1    | 79570  | TSLP         | 85480     |
| SRMS      | 6725   | IGFBP6       | 3489      |
| B4GALNT4  | 338707 | NIPSNAP3B    | 55335     |
| MS4A15    | 219995 | CXCL2        | 2920      |
| GNG13     | 51764  | LOC90586     | 90586     |
| C6orf126  | 389383 | CCDC3        | 83643     |
| CXCL10    | 3627   | TF           | 7018      |
| CRB3      | 92359  | KCNE1        | 3753      |
| KRT8      | 3856   | AKR1C2       | 1646      |
| KLK4      | 9622   | DMGDH        | 29958     |
| CXCL11    | 6373   | PI16         | 221476    |
| IFI6      | 2537   | C2orf84      | 653140    |
| MMP9      | 4318   | C4BPA        | 722       |
| CNTNAP2   | 26047  | LOC100124692 | 100124692 |

|           |        |           |        |
|-----------|--------|-----------|--------|
| WT1       | 7490   | PDE2A     | 5138   |
| LRFN2     | 57497  | ARHGAP20  | 57569  |
| EDN2      | 1907   | RERGL     | 79785  |
| DQX1      | 165545 | VIT       | 5212   |
| HSH2D     | 84941  | ADH1C     | 126    |
| HIST1H4H  | 8365   | ADCYAP1R1 | 117    |
| EPN3      | 55040  | C7orf58   | 79974  |
| FAM57B    | 83723  | TMC2      | 117532 |
| TNFRSF9   | 3604   | HS3ST4    | 9951   |
| SPOCD1    | 90853  | KBTBD12   | 166348 |
| CNTD2     | 79935  | CA6       | 765    |
| CCR8      | 1237   | COL25A1   | 84570  |
| MUC1      | 4582   | C10orf90  | 118611 |
| MAPK8IP2  | 23542  | C2orf40   | 84417  |
| IGSF9     | 57549  | SAMD5     | 389432 |
| ARMC3     | 219681 | NMNAT2    | 23057  |
| C19orf51  | 352909 | GPLD1     | 2822   |
| S100A14   | 57402  | CFD       | 1675   |
| ZMYND10   | 51364  | FOSB      | 2354   |
| TJP3      | 27134  | MLXIPL    | 51085  |
| KRT19     | 3880   | THRSP     | 7069   |
| TNNT1     | 7138   | FAM150B   | 285016 |
| CPNE7     | 27132  | PAK7      | 57144  |
| LHX2      | 9355   | PTPRQ     | 374462 |
| CAPSL     | 133690 | WIF1      | 11197  |
| C20orf151 | 140893 | CALB2     | 794    |
| AP1M2     | 10053  | LOC284578 | 284578 |
| APOC2     | 344    | CHL1      | 10752  |
| JAKMIP1   | 152789 | S100B     | 6285   |
| VGFB      | 7425   | CES4      | 51716  |
| MYT1      | 4661   | KIT       | 3815   |
| LOC400696 | 400696 | GPBAR1    | 151306 |
| C1orf230  | 284485 | EDN3      | 1908   |
| ADAMDEC1  | 27299  | FAM3D     | 131177 |
| GAL3ST2   | 64090  | GSTA1     | 2938   |
| ESRP1     | 54845  | PIGR      | 5284   |
| KISS1R    | 84634  | ARHGAP36  | 158763 |
| RAB25     | 57111  | MAMDC2    | 256691 |
| HIST1H2BG | 8339   | GPR146    | 115330 |
| ACTL8     | 81569  | CAPN11    | 11131  |
| CHRNA1    | 1134   | SYNM      | 23336  |
| NEURL     | 9148   | C2orf88   | 84281  |
| PRSS8     | 5652   | CRYAB     | 1410   |
| NMU       | 10874  | C18orf34  | 374864 |
| HOXC11    | 3227   | SCN3A     | 6328   |
| HOXC13    | 3229   | LRRN4CL   | 221091 |
| CEACAM5   | 1048   | SLC6A2    | 6530   |
| CAPN9     | 10753  | COL6A6    | 131873 |
| FOXJ1     | 2302   | PDE1C     | 5137   |
| CDC20B    | 166979 | MAOA      | 4128   |

|         |           |           |        |
|---------|-----------|-----------|--------|
| BMPR1B  | 658       | PAK3      | 5063   |
| CEACAM6 | 4680      | MMRN1     | 22915  |
| PP14571 | 100130449 | PIK3C2G   | 5288   |
| MAPK15  | 225689    | SLC14A2   | 8170   |
| EEF1A2  | 1917      | SMR3B     | 10879  |
| HOXB13  | 10481     | LEPR      | 3953   |
| PYDC1   | 260434    | DACT2     | 168002 |
| CGA     | 1081      | ANKRD53   | 79998  |
| CA9     | 768       | SLC7A14   | 57709  |
| INSM1   | 3642      | HAS3      | 3038   |
|         |           | PLAC9     | 219348 |
|         |           | NRXN1     | 9378   |
|         |           | GRIN2B    | 2904   |
|         |           | MMP27     | 64066  |
|         |           | CAPZA3    | 93661  |
|         |           | IRX6      | 79190  |
|         |           | ANO3      | 63982  |
|         |           | SPINK5    | 11005  |
|         |           | CPA2      | 1358   |
|         |           | DSG1      | 1828   |
|         |           | FABP7     | 2173   |
|         |           | C6        | 729    |
|         |           | CAV2      | 858    |
|         |           | HOXA5     | 3202   |
|         |           | EBF3      | 253738 |
|         |           | FZD4      | 8322   |
|         |           | BMP5      | 653    |
|         |           | RHOXF1    | 158800 |
|         |           | MOSC1     | 64757  |
|         |           | TMEM37    | 140738 |
|         |           | CMTM5     | 116173 |
|         |           | DRD2      | 1813   |
|         |           | APCDD1L   | 164284 |
|         |           | SPOCK3    | 50859  |
|         |           | CDR1      | 1038   |
|         |           | TMEM213   | 155006 |
|         |           | AFP       | 174    |
|         |           | LMOD1     | 25802  |
|         |           | NKAPL     | 222698 |
|         |           | ALDH1A2   | 8854   |
|         |           | C1QTNF9   | 338872 |
|         |           | FREM1     | 158326 |
|         |           | RELN      | 5649   |
|         |           | C14orf139 | 79686  |
|         |           | C3orf55   | 152078 |
|         |           | GFAP      | 2670   |
|         |           | GALNTL2   | 117248 |
|         |           | CLDND2    | 125875 |
|         |           | PLD5      | 200150 |
|         |           | SCN2A     | 6326   |

|          |        |
|----------|--------|
| MYEOV    | 26579  |
| SYN2     | 6854   |
| NTRK2    | 4915   |
| BMX      | 660    |
| RNF150   | 57484  |
| NLGN1    | 22871  |
| D4S234E  | 27065  |
| CNTFR    | 1271   |
| ACTG2    | 72     |
| XPNPEP2  | 7512   |
| NEUROG2  | 63973  |
| GRIA1    | 2890   |
| PTN      | 5764   |
| GRIK1    | 2897   |
| GLRA3    | 8001   |
| SLC26A3  | 1811   |
| MEOX2    | 4223   |
| PRRG3    | 79057  |
| CCL14    | 6358   |
| KLHL13   | 90293  |
| SAA4     | 6291   |
| TMEM195  | 392636 |
| GPR133   | 283383 |
| RNASE7   | 84659  |
| DMRT2    | 10655  |
| KCNA2    | 3737   |
| CCDC141  | 285025 |
| CLDN10   | 9071   |
| RASGEF1C | 255426 |
| LIFR     | 3977   |
| PALMD    | 54873  |
| FAM107A  | 11170  |
| FGF2     | 2247   |
| AVPR2    | 554    |
| CCDC69   | 26112  |
| SFRP1    | 6422   |
| EPHB1    | 2047   |
| HTR2A    | 3356   |
| TEPP     | 374739 |
| CMA1     | 1215   |
| CD209    | 30835  |
| FGFBP1   | 9982   |
| ALX4     | 60529  |
| GABRA2   | 2555   |
| LMX1A    | 4009   |
| TTYH1    | 57348  |
| IL6      | 3569   |
| OLFM4    | 10562  |
| CITED1   | 4435   |
| COL17A1  | 1308   |

|           |        |
|-----------|--------|
| MUCL1     | 118430 |
| PLA2G2A   | 5320   |
| LRRTM2    | 26045  |
| PGM5      | 5239   |
| SIK2      | 23235  |
| HLF       | 3131   |
| NRG2      | 9542   |
| LRRN3     | 54674  |
| ART4      | 420    |
| LPPR1     | 54886  |
| PI3       | 5266   |
| C8orf34   | 116328 |
| NTF4      | 4909   |
| C5orf23   | 79614  |
| ROPN1B    | 152015 |
| RSPO3     | 84870  |
| PDZD2     | 23037  |
| SHISA3    | 152573 |
| LILRB5    | 10990  |
| LOC286002 | 286002 |
| KLK5      | 25818  |
| HOXA4     | 3201   |
| ENPP2     | 5168   |
| SEMA3G    | 56920  |
| SLC22A3   | 6581   |
| ZBTB16    | 7704   |
| CNKSR2    | 22866  |
| SLC16A12  | 387700 |
| ELANE     | 1991   |
| ACSL1     | 2180   |
| DLK2      | 65989  |
| PTCHD3    | 374308 |
| BBOX1     | 8424   |
| MYO16     | 23026  |
| SLC4A4    | 8671   |
| CDH4      | 1002   |
| CHST9     | 83539  |
| ATP13A5   | 344905 |
| B3GAT1    | 27087  |
| RFX6      | 222546 |
| MAB21L1   | 4081   |
| GIPC2     | 54810  |
| SSTR1     | 6751   |
| F10       | 2159   |
| FHL5      | 9457   |
| RGS6      | 9628   |
| SCN2B     | 6327   |
| DNASE1L3  | 1776   |
| BMP2      | 650    |
| PLP1      | 5354   |

|            |           |
|------------|-----------|
| LOXL4      | 84171     |
| AOC2       | 314       |
| PTPRZ1     | 5803      |
| CSRNP3     | 80034     |
| PTGS2      | 5743      |
| SOX10      | 6663      |
| MARCO      | 8685      |
| ROPN1      | 54763     |
| OCA2       | 4948      |
| SYCE1      | 93426     |
| CDH19      | 28513     |
| KLK7       | 5650      |
| C4orf49    | 84709     |
| LPHN3      | 23284     |
| JPH2       | 57158     |
| MYOCD      | 93649     |
| SCN9A      | 6335      |
| LOC201651  | 201651    |
| LOC339524  | 339524    |
| KCTD4      | 386618    |
| GABRE      | 2564      |
| PHKG1      | 5260      |
| PTCHD1     | 139411    |
| EFCAB1     | 79645     |
| IL17B      | 27190     |
| ADRB1      | 153       |
| SOSTDC1    | 25928     |
| EDAR       | 10913     |
| STAC2      | 342667    |
| KRT5       | 3852      |
| KRT14      | 3861      |
| C2orf82    | 389084    |
| GSN        | 2934      |
| ADRB2      | 154       |
| HOXA6      | 3203      |
| GPC3       | 2719      |
| AKAP12     | 9590      |
| RGS7BP     | 401190    |
| AOX1       | 316       |
| FAM89A     | 375061    |
| NCRNA00092 | 100188953 |
| NAT8L      | 339983    |
| EMILIN3    | 90187     |
| IL22RA2    | 116379    |
| TAT        | 6898      |
| KLHL29     | 114818    |
| LOC286367  | 286367    |
| DENND2A    | 27147     |
| MATN2      | 4147      |
| SYNPO2     | 171024    |



|           |        |
|-----------|--------|
| ADAM33    | 80332  |
| GPR17     | 2840   |
| BMPER     | 168667 |
| SNTG2     | 54221  |
| GPR12     | 2835   |
| ACE2      | 59272  |
| TSPAN8    | 7103   |
| KLK8      | 11202  |
| CLDN8     | 9073   |
| HSPB2     | 3316   |
| C1QTNF9B  | 387911 |
| TPO       | 7173   |
| ALDH1A1   | 216    |
| CLDN5     | 7122   |
| HOXA9     | 3205   |
| KCNMB1    | 3779   |
| LOC158376 | 158376 |
| GLDN      | 342035 |
| ASTN1     | 460    |
| DDR2      | 4921   |
| PSD2      | 84249  |
| C1QTNF7   | 114905 |
| CCL28     | 56477  |
| TP53AIP1  | 63970  |
| PI15      | 51050  |
| FAM13A    | 10144  |
| GNAI1     | 2770   |
| PID1      | 55022  |
| INMT      | 11185  |
| IQSEC3    | 440073 |
| AKAP6     | 9472   |
| EGR1      | 1958   |
| C11orf92  | 399948 |
| NCAM1     | 4684   |
| PIWIL2    | 55124  |
| HSD11B1   | 3290   |
| C1QL2     | 165257 |
| LOC121838 | 121838 |
| DCX       | 1641   |
| GABRP     | 2568   |
| HOXA7     | 3204   |
| PHYHIP    | 9796   |
| CNTNAP3   | 79937  |
| ABCA6     | 23460  |
| IL33      | 90865  |
| TACR1     | 6869   |
| AKR1C3    | 8644   |
| CXCL3     | 2921   |
| FLJ37543  | 285668 |
| LMO3      | 55885  |

|           |        |
|-----------|--------|
| CXCL5     | 6374   |
| SCGB3A1   | 92304  |
| NRN1      | 51299  |
| LOC145820 | 145820 |
| KLF4      | 9314   |
| MEOX1     | 4222   |
| OSR1      | 130497 |
| WSCD2     | 9671   |
| C14orf49  | 161176 |
| PTGFR     | 5737   |
| LOC440173 | 440173 |
| PROX1     | 5629   |
| OGN       | 4969   |
| PCDH11X   | 27328  |
| KCNS1     | 3787   |
| SLC6A14   | 11254  |
| KLK6      | 5653   |
| USP44     | 84101  |
| TSHZ2     | 128553 |
| CCL16     | 6360   |
| C10orf108 | 414235 |
| TMEM178   | 130733 |
| SOD3      | 6649   |
| ECM2      | 1842   |
| STK32A    | 202374 |
| CRTAC1    | 55118  |
| TP63      | 8626   |
| MUC15     | 143662 |
| FOLR1     | 2348   |
| LY6D      | 8581   |
| TAC1      | 6863   |
| C7orf41   | 222166 |
| MRAS      | 22808  |
| NECAB1    | 64168  |
| EGFR      | 1956   |
| CX3CL1    | 6376   |
| PPP1R14A  | 94274  |
| ODZ1      | 10178  |
| SCN5A     | 6331   |
| GFRA2     | 2675   |
| PPARGC1A  | 10891  |
| LCN6      | 158062 |
| CLDN2     | 9075   |
| OR2L13    | 284521 |
| CCDC129   | 223075 |
| VGLL1     | 51442  |
| LGI4      | 163175 |
| TGFBR3    | 7049   |
| RGN       | 9104   |
| COX7A1    | 1346   |

|           |        |
|-----------|--------|
| ODF3L1    | 161753 |
| EBF2      | 64641  |
| KCNA1     | 3736   |
| BNC1      | 646    |
| SLC27A6   | 28965  |
| DEFB1     | 1672   |
| GPR64     | 10149  |
| AK5       | 26289  |
| NRG1      | 3084   |
| SLC13A2   | 9058   |
| KL        | 9365   |
| NDRG2     | 57447  |
| GNAL      | 2774   |
| LOC134466 | 134466 |
| HOXA2     | 3199   |
| STXBP6    | 29091  |
| FOXP2     | 93986  |
| TESC      | 54997  |
| C2orf71   | 388939 |
| PLCXD3    | 345557 |
| CAPN6     | 827    |
| PTX3      | 5806   |
| IRX1      | 79192  |
| TUBB2B    | 347733 |
| NR4A1     | 3164   |
| DBC1      | 1620   |
| SCN4B     | 6330   |
| ITPRIPL1  | 150771 |
| ASAM      | 79827  |
| ANK2      | 287    |
| OXGR1     | 27199  |
| LUZP2     | 338645 |
| GLB1L3    | 112937 |
| TFPI2     | 7980   |
| ELF5      | 2001   |
| SRPX      | 8406   |
| TMTC1     | 83857  |
| MT1M      | 4499   |
| KLF14     | 136259 |
| EMX2OS    | 196047 |
| RGS2      | 5997   |
| APOD      | 347    |
| MRGPRX3   | 117195 |
| DNER      | 92737  |
| UGT8      | 7368   |
| SCRG1     | 11341  |
| CYP2A6    | 1548   |
| C4orf7    | 260436 |
| DST       | 667    |
| AGAP11    | 119385 |

|          |        |
|----------|--------|
| ADAMTS1  | 9510   |
| CLIC5    | 53405  |
| PDE11A   | 50940  |
| C13orf33 | 84935  |
| TCEAL2   | 140597 |
| NPY5R    | 4889   |
| CCL13    | 6357   |
| IGSF1    | 3547   |
| SPRY2    | 10253  |
| FAM13C   | 220965 |
| PRELP    | 5549   |
| CADM3    | 57863  |
| ATF3     | 467    |
| FOS      | 2353   |
| FGF9     | 2254   |
| PPYR1    | 5540   |
| CACNA2D1 | 781    |
| TRIM29   | 23650  |
| CLCA2    | 9635   |
| HSD17B2  | 3294   |
| MIA      | 8190   |
| MUC6     | 4588   |
| ANXA1    | 301    |
| DLGAP2   | 9228   |
| BAI3     | 577    |
| RBP7     | 116362 |
| C10orf10 | 11067  |
| P2RY12   | 64805  |
| SOX5     | 6660   |
| C5orf27  | 202299 |
| FGF10    | 2255   |
| C1orf130 | 400746 |
| SCN11A   | 11280  |
| PLA2G4A  | 5321   |
| SLC10A6  | 345274 |
| FAT2     | 2196   |
| DNAH9    | 1770   |
| KCNH8    | 131096 |
| ANKRD29  | 147463 |
| TDRD10   | 126668 |
| MYLK     | 4638   |
| CASP12   | 120329 |
| ID4      | 3400   |
| CCDC85A  | 114800 |
| HFM1     | 164045 |
| KCNMB2   | 10242  |
| SNCG     | 6623   |
| PREX2    | 80243  |
| RAB3C    | 115827 |
| PDE8B    | 8622   |

|            |        |
|------------|--------|
| MRC1       | 4360   |
| KRT17      | 3872   |
| HMGCS2     | 3158   |
| APCDD1     | 147495 |
| FLJ42875   | 440556 |
| TRPM6      | 140803 |
| PTH1R      | 5745   |
| DOCK11     | 139818 |
| ANGPTL4    | 51129  |
| MAPK4      | 5596   |
| KRT15      | 3866   |
| NR3C2      | 4306   |
| TSPAN7     | 7102   |
| SCN3B      | 55800  |
| FAM149A    | 25854  |
| CLDN11     | 5010   |
| SLC25A27   | 9481   |
| DHDPSL     | 112817 |
| PKNOX2     | 63876  |
| EGR3       | 1960   |
| SMOC1      | 64093  |
| GPR88      | 54112  |
| GPM6A      | 2823   |
| LGR6       | 59352  |
| PPP1R12B   | 4660   |
| CORO2B     | 10391  |
| PER1       | 5187   |
| NCRNA00086 | 399668 |
| ASXL3      | 80816  |
| EGR2       | 1959   |
| ADAMTS18   | 170692 |
| CCL21      | 6366   |
| LRP1B      | 53353  |
| SLC34A2    | 10568  |
| GPM6B      | 2824   |
| FAM189A2   | 9413   |
| PACRG      | 135138 |
| HRASLS5    | 117245 |
| HRCT1      | 646962 |
| SLC28A3    | 64078  |
| CACHD1     | 57685  |
| C21orf34   | 388815 |
| USHBP1     | 83878  |
| C5orf4     | 10826  |
| FAM70A     | 55026  |
| DTX1       | 1840   |
| CCBE1      | 147372 |
| GREM2      | 64388  |
| KLK10      | 5655   |
| GPRASP1    | 9737   |

|          |        |
|----------|--------|
| NCALD    | 83988  |
| THSD7B   | 80731  |
| PTH2R    | 5746   |
| KCTD14   | 65987  |
| GPR109B  | 8843   |
| LRFN5    | 145581 |
| PRSS12   | 8492   |
| ZNF676   | 163223 |
| DSG3     | 1830   |
| KLK11    | 11012  |
| ITM2A    | 9452   |
| MAML2    | 84441  |
| SV2B     | 9899   |
| DARC     | 2532   |
| RIMBP2   | 23504  |
| PKP1     | 5317   |
| SOX6     | 55553  |
| IGJ      | 3512   |
| SYT8     | 90019  |
| GNG11    | 2791   |
| EFHA2    | 286097 |
| TCEAL7   | 56849  |
| RBMS3    | 27303  |
| VWCE     | 220001 |
| IGF1     | 3479   |
| SLC26A4  | 5172   |
| CYP39A1  | 51302  |
| GAS2L2   | 246176 |
| SCN7A    | 6332   |
| COL4A6   | 1288   |
| WISP3    | 8838   |
| ANXA8L2  | 244    |
| TMEM220  | 388335 |
| FAM162B  | 221303 |
| ISM1     | 140862 |
| WSCD1    | 23302  |
| CPEB1    | 64506  |
| RCAN1    | 1827   |
| SEMA3D   | 223117 |
| WDR86    | 349136 |
| FIGN     | 55137  |
| FRMD3    | 257019 |
| SERPIN5  | 5268   |
| ADAMTSL4 | 54507  |
| KCNA6    | 3742   |
| ABI3BP   | 25890  |
| PDZRN4   | 29951  |
| ARC      | 23237  |
| PEAR1    | 375033 |
| CREB5    | 9586   |

|             |           |
|-------------|-----------|
| PCDHGA3     | 56112     |
| SH3TC2      | 79628     |
| HRNR        | 388697    |
| VSIG2       | 23584     |
| LDB2        | 9079      |
| C9orf125    | 84302     |
| TGFBR2      | 7048      |
| EDNRB       | 1910      |
| C10orf128   | 170371    |
| DBX2        | 440097    |
| ABCC6P1     | 653190    |
| GDF5        | 8200      |
| CTSG        | 1511      |
| ODZ2        | 57451     |
| CDKN1C      | 1028      |
| BMP6        | 654       |
| PRIMA1      | 145270    |
| RASD1       | 51655     |
| CNGA1       | 1259      |
| PALM2-AKAP2 | 445815    |
| NBLA00301   | 79804     |
| HOXA3       | 3200      |
| SEMA6D      | 80031     |
| CDH23       | 64072     |
| MFAP4       | 4239      |
| STAC        | 6769      |
| C7          | 730       |
| DSC3        | 1825      |
| LRRC70      | 100130733 |
| KCNAB1      | 7881      |
| TMOD1       | 7111      |
| NFIB        | 4781      |
| MT1X        | 4501      |
| RGMA        | 56963     |
| CNR1        | 1268      |
| KIAA1045    | 23349     |
| PTGIS       | 5740      |
| AQP1        | 358       |
| GGTA1       | 2681      |
| RASSF9      | 9182      |
| ABCB1       | 5243      |
| GPR44       | 11251     |
| ST6GALNAC1  | 55808     |
| CPS1        | 1373      |
| NGFR        | 4804      |
| LAMB3       | 3914      |
| TWIST2      | 117581    |
| LCN10       | 414332    |
| CNNM1       | 26507     |
| SHE         | 126669    |

|           |        |
|-----------|--------|
| WASF3     | 10810  |
| SLIT3     | 6586   |
| NTRK3     | 4916   |
| FGF1      | 2246   |
| NAP1L2    | 4674   |
| GRRP1     | 79927  |
| DUSP1     | 1843   |
| PCDHGA2   | 56113  |
| MEG3      | 55384  |
| CDKL2     | 8999   |
| MAP7D3    | 79649  |
| EFEMP1    | 2202   |
| FAM126A   | 84668  |
| LAMA3     | 3909   |
| ZNF727    | 442319 |
| PIP5K1B   | 8395   |
| CPAMD8    | 27151  |
| ADCY5     | 111    |
| C16orf89  | 146556 |
| PLAGL1    | 5325   |
| PLEKHH2   | 130271 |
| PVRL3     | 25945  |
| L3MBTL4   | 91133  |
| ALDH1A3   | 220    |
| FERMT1    | 55612  |
| SH3BGRL2  | 83699  |
| PARK2     | 5071   |
| BOC       | 91653  |
| ADHFE1    | 137872 |
| CTTNBP2   | 83992  |
| DOC2B     | 8447   |
| NOVA1     | 4857   |
| LIMS2     | 55679  |
| MET       | 4233   |
| RUNX1T1   | 862    |
| F3        | 2152   |
| C8orf79   | 57604  |
| STOX2     | 56977  |
| C1orf95   | 375057 |
| S1PR1     | 1901   |
| MRGPRF    | 116535 |
| HMGCLL1   | 54511  |
| MID1      | 4281   |
| CYP11A1   | 1583   |
| TNFRSF10D | 8793   |
| CRYBG3    | 131544 |
| ARHGEF4   | 50649  |
| C4orf31   | 79625  |
| PLSCR4    | 57088  |
| ROBO3     | 64221  |



|         |        |
|---------|--------|
| FAT4    | 79633  |
| LHFP    | 10186  |
| PROS1   | 5627   |
| RIC3    | 79608  |
| SMAD9   | 4093   |
| TNNI3K  | 51086  |
| CLIP4   | 79745  |
| DCN     | 1634   |
| PCDHGB6 | 56100  |
| PPAP2B  | 8613   |
| CYYR1   | 116159 |
| COL14A1 | 7373   |
| MRAP2   | 112609 |
| PPP1R1B | 84152  |
| SELP    | 6403   |
| PDGFD   | 80310  |
| CCDC46  | 201134 |
| FLRT2   | 23768  |
| PCDHGB7 | 56099  |
| ZNF204P | 7754   |
| NLGN4X  | 57502  |
| CNTN1   | 1272   |
| TINAGL1 | 64129  |
| CXCL12  | 6387   |
| PELI2   | 57161  |

Supplementary Table 1b. Up/down regulated genes in TNBC patients

| UpRegulatedGenes |        | DownRegulatedGenes |        |
|------------------|--------|--------------------|--------|
| GeneName         | GeneID | GeneName           | GeneID |
| MMP11            | 4320   | SCN4B              | 6330   |
| COL10A1          | 1300   | ANKRD29            | 147463 |
| AURKA            | 6790   | FIGF               | 2277   |
| TPX2             | 22974  | TGFBR3             | 7049   |
| FAM72B           | 653820 | NOVA1              | 4857   |
| PRC1             | 9055   | SDPR               | 8436   |
| PLK1             | 5347   | PAMR1              | 25891  |
| CCNE1            | 898    | SSTR1              | 6751   |
| HJURP            | 55355  | CA4                | 762    |
| TACC3            | 10460  | C5orf4             | 10826  |
| CDCA8            | 55143  | PGM5               | 5239   |
| CDCA3            | 83461  | ADAMTS5            | 11096  |
| CDK1             | 983    | CD300LG            | 146894 |
| SKA1             | 220134 | LMOD1              | 25802  |
| GTSE1            | 51512  | FXYD1              | 5348   |
| UBE2T            | 29089  | MME                | 4311   |
| FAM54A           | 113115 | JAM2               | 58494  |
| PTTG1            | 9232   | MAMDC2             | 256691 |
| NUF2             | 83540  | MATN2              | 4147   |
| CEP55            | 55165  | SCN2B              | 6327   |
| CCNA2            | 890    | ABCA10             | 10349  |
| CENPA            | 1058   | PDE2A              | 5138   |
| FOXM1            | 2305   | HOXA5              | 3202   |
| FAM83D           | 81610  | HOXA7              | 3204   |
| KPNA2            | 3838   | TMTC1              | 83857  |
| C1orf135         | 79000  | PDGFD              | 80310  |
| CCNB1            | 891    | KL                 | 9365   |
| FAM72D           | 728833 | MAB21L1            | 4081   |
| UBE2C            | 11065  | MYH11              | 4629   |
| CDCA5            | 113130 | PARK2              | 5071   |
| NDC80            | 10403  | LOC572558          | 572558 |
| ANLN             | 54443  | SYNPO2             | 171024 |
| HMGB3            | 3149   | RERGL              | 79785  |
| FAM72A           | 729533 | ALDH1A2            | 8854   |
| IQGAP3           | 128239 | GPIHBP1            | 338328 |
| KIF4A            | 24137  | ADAM33             | 80332  |
| DEPDC1           | 55635  | SCARA5             | 286133 |
| PIF1             | 80119  | SH3BGRL2           | 83699  |
| PAQR4            | 124222 | ARHGAP20           | 57569  |
| SCT              | 6343   | LDB2               | 9079   |
| STMN1            | 3925   | ABCA8              | 10351  |
| MFAP2            | 4237   | AGTR1              | 185    |
| GPRIN1           | 114787 | DACH1              | 1602   |
| NCAPG            | 64151  | GPC3               | 2719   |

|          |        |          |        |
|----------|--------|----------|--------|
| BUB1     | 699    | FGF10    | 2255   |
| SPAG5    | 10615  | TSLP     | 85480  |
| CDKN3    | 1033   | CTTNBP2  | 83992  |
| TROAP    | 10024  | CAPN11   | 11131  |
| CDC20    | 991    | PEAR1    | 375033 |
| KIF14    | 9928   | BTNL9    | 153579 |
| MYBL2    | 4605   | ACOX2    | 8309   |
| LRP8     | 7804   | LRR3B    | 116135 |
| GJB2     | 2706   | TPRG1    | 285386 |
| CENPF    | 1063   | MEOX2    | 4223   |
| RAD51    | 5888   | LIFR     | 3977   |
| MELK     | 9833   | TNXB     | 7148   |
| UBE2S    | 27338  | DIXDC1   | 85458  |
| KIFC1    | 3833   | ABCA9    | 10350  |
| CCNB2    | 9133   | GIPC2    | 54810  |
| DEPDC1B  | 55789  | NOSTRIN  | 115677 |
| NEK2     | 4751   | C6orf97  | 80129  |
| KIF2C    | 11004  | EMCN     | 51705  |
| SKA3     | 221150 | SPARCL1  | 8404   |
| ORC6L    | 23594  | OGN      | 4969   |
| SPC24    | 147841 | CORO2B   | 10391  |
| CDCA2    | 157313 | PPP1R12B | 4660   |
| CKAP2L   | 150468 | CACHD1   | 57685  |
| OIP5     | 11339  | AGAP11   | 119385 |
| MCM10    | 55388  | SPRY2    | 10253  |
| TDO2     | 6999   | CCL14    | 6358   |
| SGOL1    | 151648 | NTRK2    | 4915   |
| RAD54L   | 8438   | LRRN4CL  | 221091 |
| KIF20A   | 10112  | CPA1     | 1357   |
| EZH2     | 2146   | C1QTNF9  | 338872 |
| ZNF695   | 57116  | RAPGEF3  | 10411  |
| AURKB    | 9212   | HLF      | 3131   |
| E2F1     | 1869   | TCEAL7   | 56849  |
| CDC25C   | 995    | C16orf89 | 146556 |
| KIF18B   | 146909 | BMX      | 660    |
| H2AFX    | 3014   | INMT     | 11185  |
| TRIP13   | 9319   | FAM13C   | 220965 |
| CKS2     | 1164   | ANGPTL1  | 9068   |
| SHCBP1   | 79801  | TPO      | 7173   |
| TUBB3    | 10381  | AVPR2    | 554    |
| NMU      | 10874  | TSPAN7   | 7102   |
| NEIL3    | 55247  | RAI2     | 10742  |
| CBX2     | 84733  | MAPT     | 4137   |
| HN1      | 51155  | THRB     | 7068   |
| C9orf100 | 84904  | DHDPSL   | 112817 |
| MAD2L1   | 4085   | ITIH5    | 80760  |
| C15orf42 | 90381  | C9orf125 | 84302  |

|           |        |           |        |
|-----------|--------|-----------|--------|
| ASF1B     | 55723  | CAV1      | 857    |
| ERCC6L    | 54821  | ADCY5     | 111    |
| PTTG3P    | 26255  | NKAPL     | 222698 |
| DLGAP5    | 9787   | MAOA      | 4128   |
| FAM64A    | 54478  | ATP1A2    | 477    |
| MKI67     | 4288   | SLC16A12  | 387700 |
| CA9       | 768    | ABLIM3    | 22885  |
| TTK       | 7272   | SCN3B     | 55800  |
| TNFRSF9   | 3604   | LOC134466 | 134466 |
| TK1       | 7083   | MYRIP     | 25924  |
| CNIH2     | 254263 | SEPP1     | 6414   |
| RRM2      | 6241   | TNMD      | 64102  |
| IL4I1     | 259307 | SEMA6D    | 80031  |
| VGF       | 7425   | PCDHGB7   | 56099  |
| BLM       | 641    | RNASE4    | 6038   |
| STIL      | 6491   | C21orf34  | 388815 |
| AIM1L     | 55057  | TPPP      | 11076  |
| GIN51     | 9837   | GHR       | 2690   |
| CST1      | 1469   | ATOH8     | 84913  |
| KIF23     | 9493   | NAV3      | 89795  |
| SH2D2A    | 9047   | SEMA3G    | 56920  |
| BIRC5     | 332    | ESR1      | 2099   |
| CENPI     | 2491   | KIAA1377  | 57562  |
| PKMYT1    | 9088   | FLRT2     | 23768  |
| LOC339674 | 339674 | MSRB3     | 253827 |
| ECE2      | 9718   | CXCL14    | 9547   |
| E2F8      | 79733  | PDK4      | 5166   |
| CXCL11    | 6373   | C1orf190  | 541468 |
| ACTL8     | 81569  | TTC28     | 23331  |
| KIF18A    | 81930  | SCN7A     | 6332   |
| C16orf75  | 116028 | MMRN2     | 79812  |
| GRIN2D    | 2906   | IGFBP6    | 3489   |
| LHX2      | 9355   | GRIA1     | 2890   |
| HMGA1     | 3159   | CHL1      | 10752  |
| IL21R     | 50615  | TMEM178   | 130733 |
| PBK       | 55872  | EDNRB     | 1910   |
| INHBA     | 3624   | AHNAK     | 79026  |
| WISP1     | 8840   | ADH1C     | 126    |
| MND1      | 84057  | RBMS3     | 27303  |
| HIST2H3C  | 126961 | PCDH19    | 57526  |
| NKX3-2    | 579    | BCL2      | 596    |
| RECQL4    | 9401   | PELI2     | 57161  |
| ZWINT     | 11130  | IGSF10    | 285313 |
| E2F2      | 1870   | LIMS2     | 55679  |
| RELT      | 84957  | PGR       | 5241   |
| TFR2      | 7036   | DLGAP2    | 9228   |
| CILP2     | 148113 | LRRTM2    | 26045  |

|            |        |           |           |
|------------|--------|-----------|-----------|
| FOXP3      | 50943  | MESTIT1   | 317751    |
| BGN        | 633    | SCN3A     | 6328      |
| ESPL1      | 9700   | FHL5      | 9457      |
| GINS4      | 84296  | NR3C2     | 4306      |
| CCL7       | 6354   | ZBTB16    | 7704      |
| EME1       | 146956 | ITM2A     | 9452      |
| ESCO2      | 157570 | GFRA1     | 2674      |
| MFSD2B     | 388931 | HOXA6     | 3203      |
| A2ML1      | 144568 | CHRD1     | 91851     |
| SLC16A3    | 9123   | EFEMP1    | 2202      |
| TLX1       | 3195   | ZNF676    | 163223    |
| CD80       | 941    | CDO1      | 1036      |
| KREMEN2    | 79412  | LOC728264 | 728264    |
| CCR8       | 1237   | LRRC70    | 100130733 |
| GBP5       | 115362 | ABCB5     | 340273    |
| LIMD2      | 80774  | CXCL12    | 6387      |
| C16orf59   | 80178  | C18orf34  | 374864    |
| ESM1       | 11082  | GPR81     | 27198     |
| HIST1H2AM  | 8336   | LRRC2     | 79442     |
| PRAME      | 23532  | SRPX      | 8406      |
| ADAM8      | 101    | FREM1     | 158326    |
| JAKMIP1    | 152789 | NECAB1    | 64168     |
| PSRC1      | 84722  | BAI3      | 577       |
| S100P      | 6286   | NDN       | 4692      |
| ACAN       | 176    | IL33      | 90865     |
| LOC645323  | 645323 | SVEP1     | 79987     |
| GABRD      | 2563   | SEMA3C    | 10512     |
| TIGIT      | 201633 | ACADSB    | 36        |
| KCNK12     | 56660  | LEPR      | 3953      |
| NFKBIL2    | 4796   | ASPA      | 443       |
| DBNDD1     | 79007  | EBF3      | 253738    |
| CAMP       | 820    | DNAH9     | 1770      |
| KIF4B      | 285643 | CD36      | 948       |
| CXCL9      | 4283   | CLEC3B    | 7123      |
| TLCD1      | 116238 | HOXA2     | 3199      |
| P2RY6      | 5031   | KLHL29    | 114818    |
| COL22A1    | 169044 | NAP1L2    | 4674      |
| ZBED2      | 79413  | DMD       | 1756      |
| FUT7       | 2529   | TMEM132C  | 92293     |
| TMEM132A   | 54972  | ADAMTS15  | 170689    |
| FSD1       | 79187  | ABCA6     | 23460     |
| C2orf48    | 348738 | LOC284276 | 284276    |
| EN1        | 2019   | MYOC      | 4653      |
| RCOR2      | 283248 | SLC2A4    | 6517      |
| HAGHL      | 84264  | TENC1     | 23371     |
| WIT1       | 51352  | DST       | 667       |
| HIST2H2AA3 | 8337   | TSHZ2     | 128553    |

|           |        |           |        |
|-----------|--------|-----------|--------|
| PYCR1     | 5831   | ADRB2     | 154    |
| CAMK2N2   | 94032  | NPR1      | 4881   |
| SAMD14    | 201191 | CYBRD1    | 79901  |
| GABRQ     | 55879  | SCN4A     | 6329   |
| TMEM171   | 134285 | SH3D19    | 152503 |
| CDKN2A    | 1029   | C4orf12   | 404201 |
| TYMP      | 1890   | STK32B    | 55351  |
| MKRN3     | 7681   | CASQ2     | 845    |
| HIST1H3H  | 8357   | CCDC158   | 339965 |
| ZIC1      | 7545   | AQP7      | 364    |
| CLDN9     | 9080   | TNS1      | 7145   |
| TERT      | 7015   | KIAA0408  | 9729   |
| HORMAD1   | 84072  | DUSP1     | 1843   |
| CXorf61   | 203413 | ZCCHC24   | 219654 |
| HIST1H2BJ | 8970   | ADH1B     | 125    |
| GABBR2    | 9568   | HEPACAM   | 220296 |
| PGLYRP4   | 57115  | FABP4     | 2167   |
| B3GNT4    | 79369  | NXPH3     | 11248  |
| CCL20     | 6364   | ACACB     | 32     |
| HOXB13    | 10481  | AQP7P1    | 375719 |
| PITX1     | 5307   | ENPP2     | 5168   |
| ICOS      | 29851  | ALDH1A1   | 216    |
| HIST1H3D  | 8351   | DACT2     | 168002 |
| UMODL1    | 89766  | EBF1      | 1879   |
| C17orf93  | 360205 | ANGPTL7   | 10218  |
| CAPS      | 828    | MYOCD     | 93649  |
| NXPH4     | 11247  | SOCS2     | 8835   |
| PCSK1N    | 27344  | COL14A1   | 7373   |
| RHOF      | 54509  | C10orf116 | 10974  |
| PRSS27    | 83886  | TAL1      | 6886   |
| CXCR2P1   | 3580   | CCDC85A   | 114800 |
| INA       | 9118   | TIMP4     | 7079   |
| GSDMC     | 56169  | BMPER     | 168667 |
| SLC15A1   | 6564   | DBX2      | 440097 |
| SLC26A9   | 115019 | AKAP12    | 9590   |
| HPDL      | 84842  | IGF1      | 3479   |
| FOXD1     | 2297   | PCDHGA2   | 56113  |
| KCNG1     | 3755   | MOCS1     | 4337   |
| ARTN      | 9048   | EFHA2     | 286097 |
| NPW       | 283869 | CES1      | 1066   |
| TMEM92    | 162461 | C7orf63   | 79846  |
| TMSB15A   | 11013  | CXCL2     | 2920   |
| SERPINB7  | 8710   | PRICKLE2  | 166336 |
| PRR7      | 80758  | THRSP     | 7069   |
| IVL       | 3713   | GALNTL2   | 117248 |
| NCCRP1    | 342897 | C2orf40   | 84417  |
| DLL3      | 10683  | HSD17B13  | 345275 |

|         |        |          |           |
|---------|--------|----------|-----------|
| SBSN    | 374897 | FAM149A  | 25854     |
| CTSL2   | 1515   | FAM13A   | 10144     |
| PLAC2   | 257000 | C1QTNF9B | 387911    |
| S100A8  | 6279   | PLSCR4   | 57088     |
| MAGEA4  | 4103   | CCDC152  | 100129792 |
| CASP14  | 23581  | SYBU     | 55638     |
| MAGEA6  | 4105   | RGS22    | 26166     |
| ORM2    | 5005   | SCUBE2   | 57758     |
| KRT16   | 3868   | MRGPRF   | 116535    |
| S100A7A | 338324 | FAM70A   | 55026     |
| MAGEA3  | 4102   | C4orf49  | 84709     |
| ORM1    | 5004   | PHYHIP   | 9796      |
|         |        | ADH1A    | 124       |
|         |        | PHYHD1   | 254295    |
|         |        | LAMA2    | 3908      |
|         |        | GLYAT    | 10249     |
|         |        | PTPRB    | 5787      |
|         |        | HPSE2    | 60495     |
|         |        | PER1     | 5187      |
|         |        | DCLK1    | 9201      |
|         |        | CFD      | 1675      |
|         |        | DARC     | 2532      |
|         |        | PDE8B    | 8622      |
|         |        | FGF1     | 2246      |
|         |        | KCNE1    | 3753      |
|         |        | LYVE1    | 10894     |
|         |        | SLC7A2   | 6542      |
|         |        | MEOX1    | 4222      |
|         |        | CLIC5    | 53405     |
|         |        | TGFBR2   | 7048      |
|         |        | RUNX1T1  | 862       |
|         |        | PLIN4    | 729359    |
|         |        | SLC40A1  | 30061     |
|         |        | LONRF2   | 164832    |
|         |        | IGF2     | 3481      |
|         |        | PLIN1    | 5346      |
|         |        | MASP1    | 5648      |
|         |        | ANGPT4   | 51378     |
|         |        | TBC1D9   | 23158     |
|         |        | ACSM5    | 54988     |
|         |        | THSD7B   | 80731     |
|         |        | HEPN1    | 641654    |
|         |        | ZNF423   | 23090     |
|         |        | KCNJ16   | 3773      |
|         |        | EGR1     | 1958      |
|         |        | MYOM1    | 8736      |
|         |        | DCN      | 1634      |

|              |           |
|--------------|-----------|
| ERBB4        | 2066      |
| SPATA18      | 132671    |
| TUSC5        | 286753    |
| GPD1         | 2819      |
| TRPM3        | 80036     |
| ITGA7        | 3679      |
| C14orf132    | 56967     |
| HSPB8        | 26353     |
| DOC2B        | 8447      |
| ITPR1        | 3708      |
| LOC100190938 | 100190938 |
| NLGN1        | 22871     |
| MAP1LC3C     | 440738    |
| MAST4        | 375449    |
| LOC283392    | 283392    |
| PI16         | 221476    |
| LAMA3        | 3909      |
| FHL1         | 2273      |
| NBLA00301    | 79804     |
| COL25A1      | 84570     |
| NTN4         | 59277     |
| MFAP4        | 4239      |
| PCDHGA9      | 56107     |
| ADHFE1       | 137872    |
| PDE11A       | 50940     |
| CAV2         | 858       |
| DEFB132      | 400830    |
| GLDN         | 342035    |
| PPARG        | 5468      |
| TEK          | 7010      |
| FOSB         | 2354      |
| LPHN3        | 23284     |
| ADRA2A       | 150       |
| WSCD2        | 9671      |
| LEP          | 3952      |
| NAALAD2      | 10003     |
| HBB          | 3043      |
| SLC47A2      | 146802    |
| C1QTNF7      | 114905    |
| TNNT3        | 7140      |
| PRTG         | 283659    |
| B3GALT1      | 8708      |
| GNAL         | 2774      |
| CLSTN2       | 64084     |
| CNN1         | 1264      |
| MEG3         | 55384     |
| LUZP2        | 338645    |



|           |        |
|-----------|--------|
| TMEM232   | 642987 |
| P2RY12    | 64805  |
| CIDEC     | 63924  |
| NNAT      | 4826   |
| FLJ42875  | 440556 |
| PLEKHH2   | 130271 |
| C14orf180 | 400258 |
| FMOD      | 2331   |
| FAT4      | 79633  |
| HSPB2     | 3316   |
| EDA2R     | 60401  |
| KLF4      | 9314   |
| RYR3      | 6263   |
| DLG2      | 1740   |
| EBF2      | 64641  |
| ADIPOQ    | 9370   |
| PLCXD3    | 345557 |
| PDZRN4    | 29951  |
| LIPE      | 3991   |
| GPR109B   | 8843   |
| COL6A6    | 131873 |
| CMA1      | 1215   |
| C7orf58   | 79974  |
| AMIGO2    | 347902 |
| TLL1      | 7092   |
| RELN      | 5649   |
| VIT       | 5212   |
| ABCC6     | 368    |
| GRM7      | 2917   |
| GSTM5     | 2949   |
| ABCB1     | 5243   |
| LRFN5     | 145581 |
| NPY2R     | 4887   |
| FGF2      | 2247   |
| FZD4      | 8322   |
| FOS       | 2353   |
| ADAMTS18  | 170692 |
| ASXL3     | 80816  |
| USP44     | 84101  |
| EGR3      | 1960   |
| AOX1      | 316    |
| PREX2     | 80243  |
| CPS1      | 1373   |
| CES4      | 51716  |
| GPAM      | 57678  |
| RSPO3     | 84870  |
| COL4A6    | 1288   |

|           |        |
|-----------|--------|
| MGLL      | 11343  |
| SORBS1    | 10580  |
| RDH5      | 5959   |
| DYNC2H1   | 79659  |
| RIMBP2    | 23504  |
| PCDHGA3   | 56112  |
| CCDC68    | 80323  |
| CCDC36    | 339834 |
| LOC283174 | 283174 |
| CLDN19    | 149461 |
| GPM6A     | 2823   |
| RBP4      | 5950   |
| AQPEP     | 206338 |
| GPR44     | 11251  |
| PTH1R     | 5745   |
| MUSTN1    | 389125 |
| CYP2A6    | 1548   |
| ANK2      | 287    |
| LPL       | 4023   |
| RXRG      | 6258   |
| ECM2      | 1842   |
| MRAP      | 56246  |
| SYNM      | 23336  |
| VIPR2     | 7434   |
| ANGPTL2   | 23452  |
| PCK1      | 5105   |
| PRDM16    | 63976  |
| MAOB      | 4129   |
| ACVR1C    | 130399 |
| CTSG      | 1511   |
| DMGDH     | 29958  |
| PFKFB1    | 5207   |
| GABRA2    | 2555   |
| GFAP      | 2670   |
| ACER2     | 340485 |
| C6orf155  | 79940  |
| CIDEA     | 1149   |
| ODF3L1    | 161753 |
| ANKRD30A  | 91074  |
| KIAA1683  | 80726  |
| PLP1      | 5354   |
| BMP5      | 653    |
| CPB1      | 1360   |
| ASAM      | 79827  |
| C9orf68   | 55064  |
| WLS       | 79971  |
| NBEA      | 26960  |

|            |        |
|------------|--------|
| KCND3      | 3752   |
| PAPPA2     | 60676  |
| PPP1R1A    | 5502   |
| FRMD1      | 79981  |
| PCSK5      | 5125   |
| MYLK       | 4638   |
| PVRL3      | 25945  |
| ST6GALNAC1 | 55808  |
| AR         | 367    |
| KLHL13     | 90293  |
| TMEM100    | 55273  |
| TBX15      | 6913   |
| SCN11A     | 11280  |
| ZNF483     | 158399 |
| EMX2OS     | 196047 |
| STEAP4     | 79689  |
| MT1M       | 4499   |
| SELP       | 6403   |
| ACADL      | 33     |
| TMEM195    | 392636 |
| LGALS12    | 85329  |
| HMGCLL1    | 54511  |
| PTPRT      | 11122  |
| ADH4       | 127    |
| GPR133     | 283383 |
| GPR109A    | 338442 |
| C8orf34    | 116328 |
| LRP1B      | 53353  |
| AFF3       | 3899   |
| ABCC6P1    | 653190 |
| SLIT2      | 9353   |
| TFF3       | 7033   |
| C1orf95    | 375057 |
| ODZ1       | 10178  |
| OMD        | 4958   |
| CNTN3      | 5067   |
| HAS3       | 3038   |
| SEMA3D     | 223117 |
| KCNMA1     | 3778   |
| RAB3C      | 115827 |
| RGS6       | 9628   |
| BHMT2      | 23743  |
| PRRT4      | 401399 |
| CITED1     | 4435   |
| ISM1       | 140862 |
| LIN7A      | 8825   |
| SERPINA5   | 5104   |

|           |        |
|-----------|--------|
| SULT1C4   | 27233  |
| BMP3      | 651    |
| TMEM35    | 59353  |
| KY        | 339855 |
| DSCAML1   | 57453  |
| C10orf108 | 414235 |
| CADM2     | 253559 |
| IL6ST     | 3572   |
| GSTM2     | 2946   |
| SLC25A18  | 83733  |
| INPP4B    | 8821   |
| KCNB1     | 3745   |
| ALX4      | 60529  |
| PRRG3     | 79057  |
| XPNPEP2   | 7512   |
| ERVFRDE1  | 405754 |
| ODZ2      | 57451  |
| MT1A      | 4489   |
| ZNF385B   | 151126 |
| SIGLECP3  | 284367 |
| HTR2A     | 3356   |
| CALN1     | 83698  |
| NCAM2     | 4685   |
| FCER1A    | 2205   |
| PLXNA4    | 91584  |
| ABCC8     | 6833   |
| CACNA2D1  | 781    |
| GPR17     | 2840   |
| CDKL2     | 8999   |
| KCNA6     | 3742   |
| SEMA3E    | 9723   |
| CYP4X1    | 260293 |
| RBM24     | 221662 |
| APOD      | 347    |
| GREM2     | 64388  |
| SAA1      | 6288   |
| FOXP2     | 93986  |
| SHISA6    | 388336 |
| KCNA1     | 3736   |
| LPPR1     | 54886  |
| IQSEC3    | 440073 |
| CYP4A11   | 1579   |
| ANKRD43   | 134548 |
| MS4A2     | 2206   |
| PCOLCE2   | 26577  |
| MOSC1     | 64757  |
| D4S234E   | 27065  |

|            |           |
|------------|-----------|
| PENK       | 5179      |
| FMO5       | 2330      |
| NCRNA00093 | 100188954 |
| CA12       | 771       |
| HDC        | 3067      |
| RANBP3L    | 202151    |
| CLIC6      | 54102     |
| RNF150     | 57484     |
| SCN2A      | 6326      |
| CADM3      | 57863     |
| C3orf15    | 89876     |
| CPA3       | 1359      |
| PTHLH      | 5744      |
| CAPN8      | 388743    |
| FCN2       | 2220      |

Supplementary Table 2a. Up regulated genes in 70% of TNBC patients

| Up regulated genes |        | Stage I |          |           | Stage II |          |           | Stage III |          |           |
|--------------------|--------|---------|----------|-----------|----------|----------|-----------|-----------|----------|-----------|
| GeneName           | GeneID | FC      | FDR      | frequency | FC       | FDR      | frequency | FC        | FDR      | frequency |
| IBSP               | 3381   | 6.031   | 1.91E-56 | 1         | 5.3176   | 6.86E-64 | 0.96154   | 3.9548    | 2.37E-24 | 0.76      |
| COL10A1            | 1300   | 6.6188  | 8.91E-47 | 1         | 5.2186   | 4.41E-48 | 0.875     | 5.0457    | 4.36E-28 | 0.8       |
| MMP1               | 4312   | 7.7954  | 4.46E-38 | 1         | 7.0939   | 1.17E-58 | 0.88462   | 5.7968    | 9.64E-21 | 0.64      |
| MMP11              | 4320   | 5.8746  | 2.35E-48 | 0.965517  | 4.5941   | 1.74E-55 | 0.82692   | 4.6024    | 7.28E-31 | 0.76      |
| PLK1               | 5347   | 4.3148  | 1.57E-37 | 0.965517  | 4.8809   | 5.37E-88 | 0.99038   | 4.3848    | 1.01E-33 | 0.96      |
| COL11A1            | 1301   | 6.4191  | 4.06E-36 | 0.965517  | 5.4609   | 8.41E-50 | 0.86538   | 4.2004    | 7.55E-16 | 0.72      |
| CEP55              | 55165  | 4.3062  | 1.71E-34 | 0.965517  | 4.7751   | 2.04E-79 | 0.96154   | 4.0902    | 6.50E-28 | 0.88      |
| UBE2C              | 11065  | 5.0656  | 1.98E-33 | 0.965517  | 5.6822   | 1.17E-80 | 0.99038   | 5.2466    | 6.61E-30 | 0.96      |
| ANLN               | 54443  | 4.3108  | 3.92E-33 | 0.965517  | 4.5994   | 1.99E-71 | 0.95192   | 4.4102    | 7.11E-29 | 0.92      |
| KIF4A              | 24137  | 4.917   | 1.52E-32 | 0.965517  | 5.4646   | 6.14E-80 | 0.99038   | 4.9905    | 9.04E-29 | 0.96      |
| CDC20              | 991    | 4.5467  | 1.16E-31 | 0.965517  | 5.2862   | 1.82E-80 | 0.99038   | 4.6868    | 9.68E-28 | 0.88      |
| MYBL2              | 4605   | 4.8159  | 1.42E-31 | 0.965517  | 5.4873   | 3.57E-79 | 0.99038   | 4.7776    | 2.81E-27 | 0.96      |
| MELK               | 9833   | 4.8109  | 2.65E-31 | 0.965517  | 5.3026   | 1.90E-74 | 0.96154   | 4.7805    | 2.88E-27 | 0.92      |
| CCNB2              | 9133   | 4.1586  | 6.86E-31 | 0.965517  | 4.6725   | 3.75E-75 | 0.96154   | 4.1902    | 3.76E-27 | 0.96      |
| BUB1B              | 701    | 3.6759  | 2.10E-25 | 0.965517  | 4.1822   | 4.53E-64 | 0.94231   | 3.7637    | 8.40E-22 | 0.84      |
| TPX2               | 22974  | 4.2399  | 1.09E-40 | 0.931034  | 4.7639   | 3.45E-88 | 0.98077   | 4.0418    | 3.22E-33 | 0.96      |
| HJURP              | 55355  | 4.645   | 5.45E-37 | 0.931034  | 4.9402   | 2.71E-83 | 0.98077   | 4.5065    | 1.82E-30 | 0.92      |
| CDCA3              | 83461  | 3.8804  | 1.79E-36 | 0.931034  | 4.3827   | 3.62E-81 | 0.97115   | 3.7862    | 8.15E-31 | 0.84      |
| SKA1               | 220134 | 3.8639  | 7.36E-36 | 0.931034  | 4.4977   | 3.74E-80 | 0.97115   | 4.0468    | 3.10E-32 | 0.88      |
| CENPA              | 1058   | 4.2475  | 1.91E-34 | 0.931034  | 4.8678   | 4.55E-81 | 0.97115   | 4.3819    | 7.82E-30 | 0.96      |
| FOXM1              | 2305   | 4.396   | 3.45E-34 | 0.931034  | 5.1082   | 1.36E-80 | 0.99038   | 4.1454    | 8.07E-28 | 0.92      |
| MMP13              | 4322   | 6.8793  | 5.88E-34 | 0.931034  | 5.6299   | 1.03E-41 | 0.77885   | 4.9854    | 1.59E-15 | 0.64      |
| NDC80              | 10403  | 4.3209  | 3.58E-33 | 0.931034  | 4.7498   | 8.88E-75 | 0.98077   | 4.2725    | 1.43E-27 | 0.92      |
| PPAPDC1A           | 196051 | 5.3643  | 8.35E-33 | 0.931034  | 4.5884   | 1.97E-48 | 0.81731   | 4.6051    | 1.17E-21 | 0.76      |
| IQGAP3             | 128239 | 4.7561  | 1.45E-32 | 0.931034  | 5.1631   | 6.38E-75 | 0.98077   | 4.5343    | 6.18E-27 | 0.88      |
| TROAP              | 10024  | 4.5445  | 1.16E-31 | 0.931034  | 5.0753   | 3.05E-80 | 0.98077   | 4.6022    | 3.52E-28 | 0.92      |

|         |        |        |          |          |        |          |         |        |          |      |
|---------|--------|--------|----------|----------|--------|----------|---------|--------|----------|------|
| DEPDC1B | 55789  | 3.926  | 7.23E-31 | 0.931034 | 4.231  | 4.59E-70 | 0.96154 | 3.5244 | 7.16E-23 | 0.88 |
| NEK2    | 4751   | 5.1172 | 7.68E-31 | 0.931034 | 5.4284 | 1.03E-73 | 0.97115 | 4.8201 | 3.89E-25 | 0.96 |
| KIF2C   | 11004  | 4.2497 | 9.14E-31 | 0.931034 | 5.0083 | 1.94E-80 | 0.98077 | 4.4117 | 3.84E-28 | 0.92 |
| SPC24   | 147841 | 3.6928 | 1.00E-30 | 0.931034 | 4.4781 | 3.24E-75 | 0.96154 | 3.7697 | 2.31E-26 | 0.84 |
| CDCA2   | 157313 | 4.1012 | 1.18E-30 | 0.931034 | 4.594  | 6.68E-69 | 0.95192 | 3.7745 | 7.37E-25 | 0.92 |
| NUSAP1  | 51203  | 3.6017 | 2.93E-30 | 0.931034 | 3.8189 | 5.85E-67 | 0.95192 | 3.5581 | 5.31E-25 | 0.84 |
| ASPM    | 259266 | 4.8313 | 1.41E-29 | 0.931034 | 4.9388 | 3.80E-65 | 0.95192 | 4.431  | 1.61E-22 | 0.88 |
| EXO1    | 9156   | 4.3634 | 1.70E-29 | 0.931034 | 5.0406 | 2.31E-75 | 0.97115 | 4.1189 | 2.47E-24 | 0.96 |
| KIF20A  | 10112  | 4.6292 | 2.38E-29 | 0.931034 | 4.9264 | 5.99E-71 | 0.98077 | 4.5322 | 4.86E-24 | 0.88 |
| SPC25   | 57405  | 3.6733 | 6.20E-28 | 0.931034 | 4.0629 | 1.05E-68 | 0.97115 | 3.6768 | 1.63E-24 | 0.88 |
| DLGAP5  | 9787   | 4.5353 | 2.54E-27 | 0.931034 | 4.9712 | 7.59E-69 | 0.98077 | 4.5859 | 7.50E-24 | 0.96 |
| MKI67   | 4288   | 4.0196 | 3.90E-27 | 0.931034 | 4.3064 | 2.33E-63 | 0.92308 | 3.7101 | 2.70E-21 | 0.8  |
| PKMYT1  | 9088   | 4.8373 | 1.68E-25 | 0.931034 | 5.5236 | 2.01E-70 | 0.98077 | 5.1633 | 3.36E-24 | 0.92 |
| CDC45   | 8318   | 4.4403 | 6.12E-25 | 0.931034 | 4.9393 | 5.08E-67 | 0.99038 | 4.3496 | 2.35E-21 | 0.92 |
| AURKA   | 6790   | 3.2813 | 9.27E-42 | 0.896552 | 3.8384 | 8.94E-91 | 0.96154 | 3.4456 | 2.68E-38 | 0.88 |
| FAM72B  | 653820 | 3.3422 | 8.26E-39 | 0.896552 | 3.6947 | 2.06E-73 | 0.93269 | 3.1724 | 3.20E-31 | 0.84 |
| TACC3   | 10460  | 3.0361 | 5.45E-37 | 0.896552 | 3.1091 | 4.44E-79 | 0.89423 | 2.871  | 4.06E-29 | 0.8  |
| CDCA8   | 55143  | 3.5923 | 1.17E-36 | 0.896552 | 4.2442 | 3.49E-84 | 0.97115 | 3.6886 | 6.66E-32 | 0.84 |
| GTSE1   | 51512  | 3.9429 | 9.71E-36 | 0.896552 | 4.3215 | 1.97E-79 | 0.99038 | 3.8764 | 2.57E-29 | 0.88 |
| FAM54A  | 113115 | 3.4681 | 1.46E-35 | 0.896552 | 4.1189 | 8.58E-84 | 0.96154 | 3.376  | 1.22E-31 | 0.88 |
| PTTG1   | 9232   | 3.7498 | 5.90E-35 | 0.896552 | 4.2291 | 3.12E-79 | 0.97115 | 3.9991 | 6.70E-32 | 0.88 |
| NUF2    | 83540  | 4.7154 | 1.42E-34 | 0.896552 | 5.1967 | 1.15E-79 | 0.97115 | 4.6397 | 1.67E-29 | 0.92 |
| CCNA2   | 890    | 3.5168 | 1.90E-34 | 0.896552 | 3.943  | 2.33E-75 | 0.96154 | 3.4241 | 1.05E-28 | 0.88 |
| FAM83D  | 81610  | 4.1261 | 3.56E-34 | 0.896552 | 4.5929 | 5.19E-79 | 0.96154 | 4.0431 | 6.65E-29 | 0.84 |
| CCL11   | 6356   | 4.2577 | 1.27E-33 | 0.896552 | 3.5497 | 2.32E-39 | 0.78846 | 3.8224 | 6.71E-24 | 0.84 |
| CDCA5   | 113130 | 3.4833 | 3.02E-33 | 0.896552 | 4.1637 | 1.61E-84 | 0.97115 | 3.621  | 2.40E-30 | 0.88 |
| DEPDC1  | 55635  | 4.1551 | 2.40E-32 | 0.896552 | 4.503  | 9.70E-71 | 0.94231 | 4.0006 | 5.63E-27 | 0.92 |
| GPR19   | 2842   | 3.1252 | 7.18E-32 | 0.896552 | 3.0755 | 5.93E-53 | 0.78846 | 2.067  | 2.05E-15 | 0.52 |
| KIF14   | 9928   | 4.6242 | 1.27E-31 | 0.896552 | 4.9856 | 5.05E-71 | 0.96154 | 4.4073 | 7.55E-26 | 0.92 |

|        |        |        |          |          |        |          |         |        |          |      |
|--------|--------|--------|----------|----------|--------|----------|---------|--------|----------|------|
| GJB2   | 2706   | 4.1914 | 1.79E-31 | 0.896552 | 3.757  | 6.62E-43 | 0.77885 | 3.8815 | 4.48E-21 | 0.64 |
| KIFC1  | 3833   | 4.0126 | 5.98E-31 | 0.896552 | 4.4064 | 2.97E-74 | 0.98077 | 3.7784 | 6.47E-25 | 0.88 |
| SKA3   | 221150 | 3.8952 | 9.14E-31 | 0.896552 | 4.3031 | 4.98E-70 | 0.97115 | 3.8633 | 6.15E-27 | 0.92 |
| ORC6L  | 23594  | 3.3156 | 9.59E-31 | 0.896552 | 3.8954 | 2.33E-75 | 0.95192 | 3.2603 | 1.67E-25 | 0.8  |
| CKAP2L | 150468 | 4.0383 | 1.83E-30 | 0.896552 | 4.3406 | 5.80E-66 | 0.95192 | 3.7222 | 6.47E-24 | 0.84 |
| OIP5   | 11339  | 3.1995 | 2.53E-30 | 0.896552 | 3.6391 | 6.28E-72 | 0.94231 | 3.3201 | 3.89E-27 | 0.8  |
| TDO2   | 6999   | 4.9274 | 3.53E-30 | 0.896552 | 4.5376 | 8.22E-46 | 0.82692 | 4.9629 | 7.37E-25 | 0.84 |
| SGOL1  | 151648 | 4.0492 | 3.54E-30 | 0.896552 | 4.5004 | 4.04E-71 | 0.95192 | 3.606  | 1.29E-22 | 0.84 |
| OR2B6  | 26212  | 2.7109 | 6.36E-30 | 0.896552 | 2.7493 | 3.59E-37 | 0.84615 | 2.4356 | 1.39E-20 | 0.76 |
| NCAPH  | 23397  | 3.4675 | 1.11E-29 | 0.896552 | 3.9853 | 1.94E-72 | 0.94231 | 3.3479 | 4.13E-24 | 0.84 |
| RAD54L | 8438   | 3.8948 | 1.67E-29 | 0.896552 | 4.5998 | 2.66E-77 | 0.98077 | 3.9066 | 3.97E-26 | 0.88 |
| AURKB  | 9212   | 4.6005 | 7.37E-29 | 0.896552 | 5.3122 | 5.80E-76 | 0.98077 | 4.657  | 1.70E-25 | 0.92 |
| CDC25C | 995    | 4.3701 | 1.20E-28 | 0.896552 | 4.74   | 4.64E-72 | 0.98077 | 4.2332 | 8.37E-24 | 0.88 |
| KIF18B | 146909 | 4.6765 | 1.47E-28 | 0.896552 | 5.2683 | 3.74E-74 | 0.98077 | 4.4834 | 8.86E-24 | 0.88 |
| SHCBP1 | 79801  | 3.2467 | 2.60E-28 | 0.896552 | 3.613  | 6.70E-67 | 0.92308 | 3.2227 | 9.01E-24 | 0.84 |
| HMMR   | 3161   | 4.0007 | 2.76E-28 | 0.896552 | 4.1638 | 2.57E-63 | 0.93269 | 3.7914 | 9.70E-23 | 0.92 |
| NEIL3  | 55247  | 4.1549 | 3.35E-28 | 0.896552 | 4.6291 | 1.89E-68 | 0.96154 | 4.2708 | 3.63E-25 | 0.92 |
| ASF1B  | 55723  | 3.2664 | 9.28E-28 | 0.896552 | 3.7224 | 7.72E-71 | 0.97115 | 3.2457 | 5.57E-24 | 0.88 |
| TTK    | 7272   | 3.9256 | 5.84E-27 | 0.896552 | 4.4482 | 8.00E-66 | 0.95192 | 3.7135 | 2.51E-22 | 0.88 |
| RRM2   | 6241   | 4.0892 | 1.28E-26 | 0.896552 | 4.4628 | 1.88E-67 | 0.98077 | 4.2187 | 1.21E-23 | 0.96 |
| PBK    | 55872  | 3.911  | 7.42E-24 | 0.896552 | 4.5839 | 4.81E-64 | 0.94231 | 4.2364 | 2.40E-23 | 0.96 |
| EPR1   | 8475   | 4.3048 | 9.58E-22 | 0.896552 | 4.9197 | 1.86E-50 | 0.94231 | 3.707  | 1.42E-12 | 0.8  |
| CDK1   | 983    | 3.4631 | 4.65E-36 | 0.862069 | 3.8592 | 9.72E-81 | 0.96154 | 3.5686 | 5.31E-32 | 0.88 |
| UBE2T  | 29089  | 3.5579 | 1.24E-35 | 0.862069 | 4.0179 | 1.17E-80 | 0.95192 | 3.5928 | 1.58E-32 | 0.92 |
| EPYC   | 1833   | 4.8591 | 6.16E-34 | 0.862069 | 4.1089 | 2.21E-37 | 0.76923 | 2.763  | 1.04E-13 | 0.44 |
| CENPE  | 1062   | 3.1648 | 6.92E-33 | 0.862069 | 3.5997 | 9.98E-68 | 0.92308 | 3.1829 | 2.07E-28 | 0.84 |
| FAM72A | 729533 | 3.6037 | 1.44E-32 | 0.862069 | 3.7934 | 5.80E-61 | 0.92308 | 3.1965 | 2.98E-23 | 0.76 |
| PIF1   | 80119  | 3.1349 | 2.54E-32 | 0.862069 | 3.652  | 3.99E-69 | 0.90385 | 3.1572 | 1.48E-26 | 0.8  |
| NCAPG  | 64151  | 3.7647 | 6.78E-32 | 0.862069 | 4.088  | 2.55E-73 | 0.97115 | 3.6266 | 4.64E-26 | 0.88 |



|           |        |        |          |          |        |          |         |        |          |      |
|-----------|--------|--------|----------|----------|--------|----------|---------|--------|----------|------|
| BUB1      | 699    | 4.4248 | 7.08E-32 | 0.862069 | 4.9008 | 5.15E-76 | 0.98077 | 4.1805 | 5.26E-26 | 0.92 |
| CDKN3     | 1033   | 3.4839 | 1.10E-31 | 0.862069 | 3.7204 | 8.34E-71 | 0.95192 | 3.7707 | 2.67E-31 | 0.96 |
| CENPF     | 1063   | 3.9647 | 2.10E-31 | 0.862069 | 4.1837 | 1.00E-68 | 0.95192 | 3.5445 | 1.33E-23 | 0.88 |
| KIF15     | 56992  | 3.6128 | 3.79E-30 | 0.862069 | 3.9787 | 3.61E-69 | 0.93269 | 3.3911 | 1.24E-24 | 0.76 |
| ZNF695    | 57116  | 3.8737 | 4.67E-29 | 0.862069 | 4.5797 | 1.49E-73 | 0.96154 | 3.4444 | 1.31E-21 | 0.8  |
| ERCC6L    | 54821  | 3.1615 | 1.74E-27 | 0.862069 | 3.5492 | 9.90E-65 | 0.91346 | 3.1742 | 1.82E-24 | 0.88 |
| FAM64A    | 54478  | 4.2453 | 2.70E-27 | 0.862069 | 4.7032 | 2.29E-68 | 0.97115 | 4.0186 | 2.15E-22 | 0.76 |
| IL4I1     | 259307 | 3.2623 | 1.46E-26 | 0.862069 | 3.2779 | 1.36E-51 | 0.79808 | 2.812  | 2.29E-18 | 0.68 |
| VGF       | 7425   | 3.9457 | 1.89E-26 | 0.862069 | 4.037  | 7.92E-47 | 0.82692 | 4.3669 | 3.31E-26 | 0.84 |
| KIF23     | 9493   | 3.1218 | 5.44E-26 | 0.862069 | 3.6328 | 2.75E-63 | 0.91346 | 3.2239 | 7.32E-24 | 0.84 |
| BIRC5     | 332    | 4.6273 | 1.07E-25 | 0.862069 | 5.4353 | 9.55E-71 | 0.96154 | 4.7625 | 2.03E-23 | 0.88 |
| TOP2A     | 7153   | 4.1427 | 5.21E-25 | 0.862069 | 4.4314 | 4.49E-60 | 0.95192 | 3.707  | 1.83E-18 | 0.76 |
| KIAA0101  | 9768   | 3.7211 | 1.51E-23 | 0.862069 | 4.0702 | 2.40E-59 | 0.93269 | 3.7709 | 1.14E-21 | 0.84 |
| MND1      | 84057  | 3.6982 | 2.15E-23 | 0.862069 | 4.2054 | 1.78E-55 | 0.92308 | 3.7546 | 1.88E-20 | 0.84 |
| UHRF1     | 29128  | 3.9969 | 3.83E-23 | 0.862069 | 4.4563 | 7.83E-61 | 0.96154 | 3.9793 | 1.43E-19 | 0.88 |
| SLC7A5    | 8140   | 3.1761 | 2.80E-21 | 0.862069 | 3.8467 | 7.59E-56 | 0.93269 | 3.504  | 2.57E-20 | 0.76 |
| CENPM     | 79019  | 3.4973 | 2.45E-20 | 0.862069 | 3.83   | 1.47E-54 | 0.92308 | 3.7203 | 7.69E-19 | 0.84 |
| PRC1      | 9055   | 3.0472 | 3.38E-38 | 0.827586 | 3.2974 | 2.23E-73 | 0.89423 | 2.7335 | 3.29E-30 | 0.76 |
| GPRIN1    | 114787 | 2.9259 | 4.44E-32 | 0.827586 | 3.221  | 1.20E-66 | 0.85577 | 2.9027 | 6.18E-27 | 0.68 |
| SPAG5     | 10615  | 2.8442 | 8.50E-32 | 0.827586 | 3.3239 | 1.46E-73 | 0.93269 | 2.7709 | 1.49E-27 | 0.76 |
| RAD51     | 5888   | 2.9826 | 2.10E-31 | 0.827586 | 3.4526 | 1.14E-75 | 0.93269 | 3.1584 | 1.51E-29 | 0.88 |
| CKS2      | 1164   | 2.7186 | 2.48E-28 | 0.827586 | 3.2743 | 3.10E-66 | 0.91346 | 3.0271 | 2.09E-28 | 0.8  |
| CLEC5A    | 23601  | 3.7148 | 1.14E-27 | 0.827586 | 3.401  | 9.95E-44 | 0.75    | 2.4313 | 4.50E-13 | 0.48 |
| PTTG3P    | 26255  | 2.4272 | 1.92E-27 | 0.827586 | 2.6532 | 1.55E-53 | 0.90385 | 2.4866 | 2.82E-25 | 0.84 |
| TNFRSF9   | 3604   | 3.7602 | 8.73E-27 | 0.827586 | 3.2441 | 1.04E-34 | 0.71154 | 2.5909 | 4.25E-14 | 0.6  |
| CNIH2     | 254263 | 3.9264 | 1.25E-26 | 0.827586 | 4.041  | 3.07E-46 | 0.78846 | 3.7624 | 2.64E-23 | 0.8  |
| LOC339674 | 339674 | 2.7855 | 2.39E-25 | 0.827586 | 3.0474 | 1.70E-49 | 0.80769 | 2.8018 | 6.87E-22 | 0.8  |
| CLSPN     | 63967  | 3.665  | 1.02E-23 | 0.827586 | 4.0335 | 6.38E-53 | 0.86538 | 3.3676 | 2.22E-19 | 0.8  |
| ADAMDEC1  | 27299  | 4.8205 | 8.77E-20 | 0.827586 | 4.3561 | 1.08E-32 | 0.67308 | 3.7768 | 5.31E-12 | 0.52 |

|          |        |        |          |          |        |          |         |        |          |      |
|----------|--------|--------|----------|----------|--------|----------|---------|--------|----------|------|
| FAM111B  | 374393 | 3.5203 | 1.15E-19 | 0.827586 | 3.6499 | 2.10E-46 | 0.78846 | 3.2813 | 5.55E-15 | 0.72 |
| CCNE1    | 898    | 3.2257 | 4.02E-37 | 0.793103 | 4.186  | 2.80E-78 | 0.91346 | 3.5942 | 8.02E-37 | 0.92 |
| FAM72D   | 728833 | 3.5015 | 1.45E-33 | 0.793103 | 3.5992 | 3.08E-56 | 0.84615 | 3.2325 | 5.66E-27 | 0.76 |
| SCT      | 6343   | 3.2643 | 2.76E-32 | 0.793103 | 2.3953 | 8.91E-29 | 0.57692 | 2.5788 | 1.38E-18 | 0.6  |
| MCM10    | 55388  | 3.9637 | 2.75E-30 | 0.793103 | 4.6242 | 4.59E-73 | 0.96154 | 3.6911 | 2.91E-25 | 0.88 |
| EZH2     | 2146   | 3.0845 | 4.25E-29 | 0.793103 | 3.3082 | 8.29E-66 | 0.89423 | 2.7981 | 2.80E-24 | 0.76 |
| E2F1     | 1869   | 2.8447 | 1.10E-28 | 0.793103 | 3.4874 | 1.29E-76 | 0.91346 | 3.0188 | 8.30E-28 | 0.8  |
| TUBB3    | 10381  | 3.6367 | 2.79E-28 | 0.793103 | 3.8851 | 5.69E-54 | 0.82692 | 3.8485 | 8.25E-24 | 0.76 |
| NMU      | 10874  | 5.0037 | 2.86E-28 | 0.793103 | 5.1731 | 8.85E-42 | 0.79808 | 4.175  | 1.03E-18 | 0.64 |
| TK1      | 7083   | 3.3432 | 9.21E-27 | 0.793103 | 3.8687 | 8.15E-71 | 0.95192 | 3.4179 | 1.41E-24 | 0.84 |
| BLM      | 641    | 2.6206 | 2.37E-26 | 0.793103 | 2.9901 | 6.00E-60 | 0.82692 | 2.2612 | 1.49E-19 | 0.6  |
| LMNB1    | 4001   | 2.8816 | 2.48E-26 | 0.793103 | 3.1    | 2.21E-61 | 0.81731 | 2.6762 | 1.53E-20 | 0.72 |
| AIM1L    | 55057  | 3.616  | 3.66E-26 | 0.793103 | 3.9049 | 6.06E-47 | 0.83654 | 4.2097 | 9.02E-25 | 0.84 |
| DTL      | 51514  | 3.3125 | 4.55E-25 | 0.793103 | 3.5868 | 4.01E-61 | 0.92308 | 3.0125 | 3.06E-19 | 0.68 |
| E2F8     | 79733  | 4.1244 | 5.02E-25 | 0.793103 | 4.5115 | 1.38E-61 | 0.86538 | 3.7423 | 1.07E-19 | 0.72 |
| ACTL8    | 81569  | 4.663  | 1.19E-24 | 0.793103 | 5.613  | 1.14E-37 | 0.85577 | 4.5935 | 7.09E-22 | 0.8  |
| FANCA    | 2175   | 3.1812 | 2.42E-24 | 0.793103 | 3.4903 | 3.75E-59 | 0.875   | 3.0212 | 1.62E-19 | 0.76 |
| TCAM1P   | 146771 | 4.0196 | 2.90E-23 | 0.793103 | 3.8318 | 5.76E-33 | 0.68269 | NA     | NA       | NA   |
| RECQL4   | 9401   | 3.0024 | 5.40E-23 | 0.793103 | 3.693  | 2.13E-64 | 0.90385 | 3.6415 | 1.77E-25 | 0.84 |
| E2F2     | 1870   | 3.2279 | 8.19E-23 | 0.793103 | 3.6879 | 1.19E-58 | 0.91346 | 3.2132 | 1.39E-20 | 0.8  |
| KIAA1199 | 57214  | 3.7122 | 4.96E-22 | 0.793103 | 3.4908 | 1.12E-31 | 0.70192 | 3.3347 | 5.15E-16 | 0.56 |
| CASC5    | 57082  | 3.2303 | 6.76E-22 | 0.793103 | 3.3683 | 4.15E-41 | 0.76923 | 2.9347 | 3.11E-15 | 0.72 |
| ESCO2    | 157570 | 3.088  | 1.85E-21 | 0.793103 | 3.4331 | 5.50E-52 | 0.79808 | 2.8931 | 2.07E-16 | 0.64 |
| CTHRC1   | 115908 | 2.821  | 6.46E-21 | 0.793103 | 2.2569 | 1.56E-30 | 0.45192 | 2.5913 | 4.00E-16 | 0.68 |
| S100P    | 6286   | 5.1003 | 1.09E-19 | 0.793103 | 4.3259 | 2.02E-24 | 0.64423 | 4.6156 | 2.09E-14 | 0.72 |
| C1orf135 | 79000  | 2.5966 | 1.20E-33 | 0.758621 | 3.1878 | 8.55E-78 | 0.90385 | 2.5062 | 4.21E-28 | 0.76 |
| MFAP2    | 4237   | 2.8828 | 4.25E-32 | 0.758621 | 2.6821 | 9.56E-41 | 0.70192 | 2.8125 | 4.78E-25 | 0.72 |
| RAD51AP1 | 10635  | 2.8564 | 9.38E-29 | 0.758621 | 3.2941 | 5.53E-62 | 0.86538 | 2.4127 | 6.87E-20 | 0.68 |
| C15orf42 | 90381  | 2.7773 | 7.94E-28 | 0.758621 | 3.3142 | 1.33E-66 | 0.89423 | 2.5889 | 1.43E-22 | 0.72 |

|           |        |        |          |          |        |          |         |        |          |      |
|-----------|--------|--------|----------|----------|--------|----------|---------|--------|----------|------|
| KIF11     | 3832   | 2.8833 | 1.57E-27 | 0.758621 | 3.2926 | 2.03E-65 | 0.92308 | 2.7296 | 2.30E-22 | 0.76 |
| HSD17B6   | 8630   | 2.9287 | 7.56E-27 | 0.758621 | 2.6689 | 1.80E-42 | 0.70192 | 2.4771 | 5.88E-18 | 0.6  |
| CST1      | 1469   | 6.1509 | 5.36E-26 | 0.758621 | 4.9291 | 9.00E-30 | 0.66346 | 3.7862 | 1.21E-11 | 0.36 |
| KIF18A    | 81930  | 3.0161 | 1.61E-24 | 0.758621 | 3.5031 | 4.07E-62 | 0.90385 | 2.9171 | 1.50E-20 | 0.64 |
| LHX2      | 9355   | 3.2786 | 5.88E-24 | 0.758621 | 3.6347 | 1.41E-32 | 0.73077 | 3.4112 | 1.03E-22 | 0.72 |
| CDC6      | 990    | 2.7998 | 6.06E-24 | 0.758621 | 3.3768 | 1.05E-66 | 0.92308 | 2.8856 | 1.53E-22 | 0.84 |
| HIST2H3C  | 126961 | 2.4904 | 3.03E-23 | 0.758621 | 2.3956 | 7.04E-38 | 0.70192 | 2.7483 | 4.15E-26 | 0.8  |
| ESPL1     | 9700   | 3.3405 | 3.54E-22 | 0.758621 | 3.8476 | 2.54E-63 | 0.94231 | 3.198  | 2.78E-18 | 0.72 |
| E2F7      | 144455 | 3.5166 | 1.10E-21 | 0.758621 | 3.6817 | 9.70E-48 | 0.80769 | 3.0554 | 4.54E-15 | 0.52 |
| ENTHD1    | 150350 | 2.88   | 3.14E-21 | 0.758621 | 2.311  | 1.29E-30 | 0.61538 | NA     | NA       | NA   |
| ADAMTS14  | 140766 | 3.5369 | 3.24E-21 | 0.758621 | 3.2517 | 1.30E-41 | 0.60577 | 3.0757 | 7.28E-15 | 0.56 |
| CST4      | 1472   | 2.5384 | 4.66E-21 | 0.758621 | NA     | NA       | NA      | NA     | NA       | NA   |
| WBSCR28   | 135886 | 2.6484 | 2.74E-20 | 0.758621 | 2.3214 | 2.06E-25 | 0.67308 | NA     | NA       | NA   |
| HIST1H2AM | 8336   | 2.983  | 3.43E-20 | 0.758621 | 3.0827 | 6.64E-43 | 0.75962 | 3.514  | 8.63E-25 | 0.88 |
| CDT1      | 81620  | 3.3231 | 1.66E-19 | 0.758621 | 3.9228 | 4.35E-57 | 0.93269 | 3.5204 | 9.69E-19 | 0.8  |
| CLEC6A    | 93978  | 2.0693 | 7.65E-18 | 0.758621 | 2.0957 | 1.18E-23 | 0.65385 | NA     | NA       | NA   |
| CBS       | 875    | 2.7366 | 4.52E-17 | 0.758621 | 3.3062 | 2.67E-43 | 0.78846 | NA     | NA       | NA   |
| ZIC1      | 7545   | 4.0664 | 1.33E-15 | 0.758621 | 4.1791 | 1.61E-28 | 0.78846 | 2.1718 | 4.77E-05 | 0.52 |
| CCNB1     | 891    | 2.5727 | 1.24E-33 | 0.724138 | 3.0603 | 7.78E-77 | 0.875   | 2.9043 | 1.39E-33 | 0.84 |
| UBE2S     | 27338  | 2.6835 | 3.28E-31 | 0.724138 | 3.3311 | 1.91E-76 | 0.89423 | 3.1006 | 3.07E-31 | 0.8  |
| TRIP13    | 9319   | 2.7118 | 1.86E-28 | 0.724138 | 3.5018 | 1.77E-73 | 0.92308 | 2.8363 | 4.36E-28 | 0.76 |
| CBX2      | 84733  | 2.6854 | 4.38E-28 | 0.724138 | 3.7014 | 1.26E-77 | 0.90385 | 3.2018 | 1.66E-35 | 0.8  |
| CXCL10    | 3627   | 4.6167 | 1.75E-27 | 0.724138 | 4.222  | 4.52E-42 | 0.81731 | 3.2932 | 1.65E-17 | 0.68 |
| CA9       | 768    | 5.5562 | 5.02E-27 | 0.724138 | 6.1719 | 1.35E-45 | 0.82692 | 5.8261 | 1.53E-25 | 0.76 |
| SH2D2A    | 9047   | 2.858  | 9.84E-26 | 0.724138 | 2.8777 | 4.27E-51 | 0.74038 | 2.6264 | 5.45E-21 | 0.76 |
| TYMS      | 7298   | 2.7367 | 2.61E-25 | 0.724138 | 3.1345 | 3.46E-56 | 0.80769 | 2.5466 | 5.69E-20 | 0.68 |
| POLQ      | 10721  | 3.2282 | 4.76E-25 | 0.724138 | 3.6646 | 2.73E-63 | 0.95192 | 2.9287 | 3.85E-19 | 0.8  |
| HIST1H2BO | 8348   | 2.8169 | 1.99E-23 | 0.724138 | 3.0169 | 2.83E-44 | 0.85577 | 2.9576 | 6.20E-26 | 0.84 |
| CCL7      | 6354   | 3.5255 | 5.98E-22 | 0.724138 | 3.935  | 4.34E-38 | 0.75    | 2.2056 | 1.32E-10 | 0.52 |

|           |        |        |          |          |        |          |         |        |          |      |
|-----------|--------|--------|----------|----------|--------|----------|---------|--------|----------|------|
| CCR8      | 1237   | 3.2082 | 5.49E-21 | 0.724138 | 2.7915 | 3.96E-30 | 0.66346 | 2.5008 | 3.27E-13 | 0.6  |
| ORC1L     | 4998   | 2.9902 | 1.12E-20 | 0.724138 | 3.8125 | 3.27E-64 | 0.94231 | 3.1133 | 1.22E-19 | 0.76 |
| PRAME     | 23532  | 5.7185 | 3.92E-20 | 0.724138 | 6.5928 | 5.04E-45 | 0.82692 | 4.6327 | 4.60E-12 | 0.64 |
| ETV7      | 51513  | 2.8083 | 9.85E-20 | 0.724138 | 2.7618 | 1.44E-35 | 0.61538 | NA     | NA       | NA   |
| LRRC15    | 131578 | 3.3665 | 5.53E-19 | 0.724138 | 2.4345 | 2.14E-20 | 0.50962 | 2.2353 | 1.82E-08 | 0.4  |
| HAPLN1    | 1404   | 4.4536 | 7.75E-19 | 0.724138 | 4.1224 | 2.42E-32 | 0.71154 | 3.6656 | 1.53E-14 | 0.6  |
| KIF26B    | 55083  | 3.3308 | 7.94E-19 | 0.724138 | 2.5992 | 7.30E-25 | 0.58654 | 2.9402 | 6.23E-15 | 0.68 |
| LOC645323 | 645323 | 3.1471 | 8.20E-19 | 0.724138 | 3.372  | 9.37E-30 | 0.71154 | 2.4996 | 3.77E-12 | 0.52 |
| CHST6     | 4166   | 2.8951 | 2.84E-18 | 0.724138 | 3.133  | 1.68E-31 | 0.65385 | 2.1324 | 1.31E-09 | 0.44 |
| RAET1K    | 646024 | 2.3682 | 2.85E-18 | 0.724138 | 2.4689 | 2.04E-32 | 0.66346 | 2.2803 | 3.18E-15 | 0.72 |
| COL9A3    | 1299   | 3.9741 | 3.07E-16 | 0.724138 | 3.2217 | 4.25E-20 | 0.56731 | 2.5079 | 1.62E-07 | 0.44 |
| MKRN3     | 7681   | 3.9641 | 5.36E-16 | 0.724138 | 4.1122 | 4.38E-31 | 0.76923 | 3.0401 | 1.36E-10 | 0.6  |
| COMP      | 1311   | 4.1757 | 1.17E-15 | 0.724138 | 3.4435 | 1.97E-19 | 0.63462 | 3.5684 | 1.39E-10 | 0.64 |
| RLTPR     | 146206 | 3.0851 | 1.42E-15 | 0.724138 | 3.104  | 1.59E-32 | 0.67308 | 2.3997 | 2.79E-11 | 0.52 |
| PAQR4     | 124222 | 2.5002 | 2.61E-32 | 0.689655 | 2.7456 | 2.04E-66 | 0.75962 | 2.6136 | 2.92E-26 | 0.76 |
| LRP8      | 7804   | 2.4823 | 1.58E-31 | 0.689655 | 2.8698 | 2.09E-62 | 0.80769 | 2.2571 | 2.63E-20 | 0.56 |
| ARHGAP11A | 9824   | 2.4588 | 3.93E-29 | 0.689655 | 2.9124 | 6.85E-64 | 0.84615 | 2.431  | 1.62E-25 | 0.64 |
| CCNE2     | 9134   | 3.1269 | 8.33E-28 | 0.689655 | 3.1245 | 7.00E-50 | 0.75    | 2.9945 | 4.39E-24 | 0.8  |
| GIN51     | 9837   | 2.7084 | 4.09E-26 | 0.689655 | 3.0549 | 2.16E-62 | 0.84615 | 2.7884 | 1.21E-25 | 0.8  |
| ULBP1     | 80329  | 3.1868 | 2.21E-25 | 0.689655 | 3.8879 | 1.55E-55 | 0.86538 | 3.0304 | 1.63E-19 | 0.6  |
| CXCL11    | 6373   | 4.5712 | 5.58E-25 | 0.689655 | 4.0685 | 1.62E-40 | 0.78846 | 3.2669 | 2.79E-15 | 0.64 |
| TFR2      | 7036   | 3.3922 | 1.31E-22 | 0.689655 | 3.6623 | 4.15E-43 | 0.77885 | 2.9314 | 8.05E-17 | 0.6  |
| A2ML1     | 144568 | 4.4862 | 3.18E-21 | 0.689655 | 4.283  | 1.71E-26 | 0.70192 | 3.7598 | 1.24E-13 | 0.72 |
| KIF4B     | 285643 | 2.1742 | 3.16E-18 | 0.689655 | 2.7541 | 2.35E-55 | 0.83654 | 2.2715 | 9.36E-19 | 0.68 |
| GAL       | 51083  | 3.2804 | 4.20E-16 | 0.689655 | 3.9515 | 3.04E-35 | 0.75    | 3.0476 | 2.63E-12 | 0.6  |
| PITX1     | 5307   | 3.6808 | 5.89E-14 | 0.689655 | 4.535  | 8.43E-45 | 0.875   | 4.7661 | 2.21E-19 | 0.8  |
| SOX11     | 6664   | 3.9797 | 6.87E-14 | 0.689655 | 4.4043 | 2.76E-32 | 0.75    | 3.4747 | 5.63E-10 | 0.56 |
| MEX3A     | 92312  | 2.887  | 2.90E-12 | 0.689655 | 3.3617 | 3.09E-36 | 0.79808 | 2.3166 | 5.07E-08 | 0.52 |
| C1orf106  | 55765  | 2.965  | 6.47E-09 | 0.689655 | 3.1932 | 1.90E-25 | 0.71154 | 2.9775 | 2.63E-08 | 0.56 |

|          |        |        |          |          |        |          |         |        |          |      |
|----------|--------|--------|----------|----------|--------|----------|---------|--------|----------|------|
| HMGB3    | 3149   | 2.4395 | 1.33E-32 | 0.655172 | 2.8378 | 3.36E-74 | 0.85577 | 2.7745 | 6.61E-36 | 0.92 |
| STMN1    | 3925   | 2.384  | 3.44E-32 | 0.655172 | 2.6682 | 6.50E-67 | 0.75    | 2.2452 | 4.01E-29 | 0.6  |
| MAD2L1   | 4085   | 2.3594 | 7.61E-28 | 0.655172 | 2.8858 | 5.79E-64 | 0.80769 | 2.3473 | 6.20E-26 | 0.64 |
| DIAPH3   | 81624  | 3.0639 | 2.52E-27 | 0.655172 | 3.4708 | 8.62E-59 | 0.88462 | 2.7081 | 2.66E-21 | 0.68 |
| CENPI    | 2491   | 2.8511 | 1.17E-25 | 0.655172 | 3.3056 | 9.84E-55 | 0.875   | 2.9807 | 4.38E-24 | 0.8  |
| CDC25A   | 993    | 2.833  | 6.71E-25 | 0.655172 | 3.5098 | 1.54E-66 | 0.89423 | 2.9885 | 1.94E-24 | 0.84 |
| ZWINT    | 11130  | 2.5818 | 6.19E-23 | 0.655172 | 2.9755 | 2.37E-60 | 0.83654 | 2.7043 | 3.65E-22 | 0.72 |
| GSG2     | 83903  | 2.3852 | 1.26E-22 | 0.655172 | 2.9446 | 1.38E-59 | 0.79808 | 2.2381 | 6.23E-19 | 0.64 |
| DMRT1    | 1761   | 2.3187 | 5.86E-18 | 0.655172 | 3.1056 | 2.96E-29 | 0.73077 | NA     | NA       | NA   |
| C2orf48  | 348738 | 2.7337 | 1.50E-17 | 0.655172 | 3.4369 | 4.03E-52 | 0.83654 | 2.3074 | 8.37E-15 | 0.6  |
| STRA8    | 346673 | 2.0481 | 3.81E-17 | 0.655172 | 2.1528 | 1.24E-21 | 0.70192 | NA     | NA       | NA   |
| TLX1NB   | 1E+08  | 2.3983 | 4.39E-16 | 0.655172 | 2.9331 | 3.76E-27 | 0.76923 | NA     | NA       | NA   |
| OTX1     | 5013   | 3.4273 | 1.59E-15 | 0.655172 | 3.7295 | 8.35E-39 | 0.75    | 3.019  | 7.27E-12 | 0.52 |
| ZIC4     | 84107  | 2.7993 | 1.19E-12 | 0.655172 | 2.945  | 3.09E-24 | 0.70192 | NA     | NA       | NA   |
| KPNA2    | 3838   | 2.1905 | 6.39E-34 | 0.62069  | 2.6487 | 1.70E-70 | 0.78846 | 2.1087 | 8.54E-29 | 0.6  |
| WDR62    | 284403 | 3.7009 | 1.85E-28 | 0.62069  | 4.0506 | 3.53E-71 | 0.81731 | 3.5741 | 2.47E-24 | 0.72 |
| KIAA1524 | 57650  | 2.2542 | 2.92E-25 | 0.62069  | 2.6464 | 1.39E-56 | 0.71154 | NA     | NA       | NA   |
| CIT      | 11113  | 2.3232 | 3.14E-24 | 0.62069  | 2.645  | 7.00E-59 | 0.75962 | 2.0644 | 2.67E-18 | 0.4  |
| C16orf75 | 116028 | 2.7406 | 5.38E-24 | 0.62069  | 3.0609 | 4.34E-59 | 0.83654 | 2.6027 | 4.69E-19 | 0.56 |
| CDC7     | 8317   | 2.3433 | 1.35E-21 | 0.62069  | 2.75   | 5.55E-54 | 0.72115 | 2.1424 | 4.36E-17 | 0.48 |
| TLX1     | 3195   | 4.276  | 3.90E-21 | 0.62069  | 5.4103 | 8.17E-37 | 0.78846 | 3.2221 | 2.28E-12 | 0.52 |
| C16orf59 | 80178  | 2.7817 | 1.25E-20 | 0.62069  | 3.5597 | 5.13E-65 | 0.94231 | 3.1454 | 6.53E-23 | 0.76 |
| CCDC150  | 284992 | 2.2251 | 9.77E-20 | 0.62069  | 2.7755 | 7.39E-51 | 0.73077 | 2.0213 | 2.59E-15 | 0.56 |
| PRR11    | 55771  | 3.0226 | 8.99E-19 | 0.62069  | 3.3769 | 5.49E-37 | 0.80769 | 2.3978 | 6.98E-11 | 0.56 |
| KCNK12   | 56660  | 2.6177 | 1.49E-18 | 0.62069  | 2.4962 | 3.79E-37 | 0.70192 | 2.7898 | 3.64E-17 | 0.72 |
| CDKN2A   | 1029   | 2.999  | 2.64E-16 | 0.62069  | 3.597  | 2.70E-29 | 0.71154 | 2.7474 | 8.09E-13 | 0.56 |
| HORMAD1  | 84072  | 4.4563 | 2.61E-15 | 0.62069  | 5.5917 | 2.88E-32 | 0.73077 | 3.4521 | 1.56E-09 | 0.48 |
| TLX3     | 30012  | 2.2706 | 2.57E-13 | 0.62069  | 3.1764 | 8.43E-26 | 0.75962 | NA     | NA       | NA   |
| CDCA7    | 83879  | 2.3656 | 3.35E-13 | 0.62069  | 3.1264 | 6.35E-48 | 0.81731 | 2.4869 | 1.16E-13 | 0.56 |

|            |        |        |          |          |        |          |         |        |          |      |
|------------|--------|--------|----------|----------|--------|----------|---------|--------|----------|------|
| STIL       | 6491   | 2.6033 | 2.86E-26 | 0.586207 | 2.9991 | 3.88E-59 | 0.81731 | 2.3565 | 4.20E-21 | 0.72 |
| ECE2       | 9718   | 2.3059 | 2.54E-25 | 0.586207 | 2.8963 | 7.80E-67 | 0.81731 | 2.6512 | 1.06E-28 | 0.72 |
| EME1       | 146956 | 2.2939 | 6.45E-22 | 0.586207 | 3.0229 | 9.61E-68 | 0.85577 | 2.1737 | 8.06E-20 | 0.56 |
| KREMEN2    | 79412  | 3.3451 | 5.17E-21 | 0.586207 | 3.7957 | 2.01E-42 | 0.74038 | 3.9127 | 1.32E-22 | 0.76 |
| RDM1       | 201299 | 2.5923 | 8.09E-15 | 0.586207 | 3.4356 | 1.18E-46 | 0.84615 | 2.1863 | 2.57E-11 | 0.56 |
| C18orf56   | 494514 | 2.2182 | 1.63E-14 | 0.586207 | 2.7897 | 1.06E-40 | 0.73077 | 2.3988 | 6.25E-16 | 0.6  |
| HMGA1      | 3159   | 2.2129 | 6.94E-24 | 0.551724 | 2.5938 | 4.91E-57 | 0.71154 | 2.1747 | 2.55E-20 | 0.4  |
| MFSD2B     | 388931 | 2.3537 | 2.99E-21 | 0.551724 | 2.794  | 3.32E-53 | 0.75    | 2.3744 | 4.20E-18 | 0.52 |
| PSRC1      | 84722  | 2.3077 | 8.78E-20 | 0.551724 | 2.7786 | 8.90E-56 | 0.77885 | 2.4787 | 5.78E-20 | 0.68 |
| RCOR2      | 283248 | 2.4176 | 3.28E-17 | 0.551724 | 3.4824 | 4.05E-50 | 0.76923 | 2.5678 | 5.11E-15 | 0.6  |
| C17orf93   | 360205 | 2.1441 | 2.27E-13 | 0.551724 | 2.809  | 9.95E-25 | 0.71154 | 2.3393 | 1.66E-16 | 0.6  |
| HN1        | 51155  | 2.1996 | 5.47E-28 | 0.517241 | 2.73   | 5.50E-68 | 0.76923 | 2.2561 | 2.08E-25 | 0.6  |
| NFKBIL2    | 4796   | 2.2644 | 1.74E-18 | 0.517241 | 2.8499 | 2.29E-53 | 0.75    | 2.7379 | 1.34E-21 | 0.72 |
| B3GNT4     | 79369  | 2.387  | 1.18E-14 | 0.482759 | 2.764  | 1.07E-38 | 0.70192 | 3.0138 | 1.07E-19 | 0.76 |
| HPDL       | 84842  | 2.4721 | 1.31E-11 | 0.482759 | 3.3782 | 1.17E-38 | 0.74038 | 2.5104 | 3.73E-10 | 0.64 |
| POC1A      | 25886  | 2.07   | 5.79E-26 | 0.448276 | 2.4424 | 9.88E-65 | 0.71154 | 2.3003 | 2.09E-28 | 0.64 |
| HIST1H3B   | 8358   | NA     | NA       | NA       | 2.1927 | 6.65E-37 | 0.85577 | 2.0583 | 2.73E-22 | 0.84 |
| CENPW      | 387103 | NA     | NA       | NA       | 2.8611 | 3.08E-61 | 0.75962 | 2.3757 | 7.74E-26 | 0.6  |
| SMC1B      | 27127  | 3.5499 | 7.32E-19 | 0.689655 | 3.5222 | 1.29E-32 | 0.68269 | 3.2393 | 1.66E-16 | 0.76 |
| SIX2       | 10736  | 2.3182 | 1.48E-12 | 0.586207 | 2.122  | 9.95E-18 | 0.47115 | 2.7205 | 3.20E-13 | 0.72 |
| C9orf140   | 89958  | 2.5601 | 2.22E-11 | 0.517241 | 3.0824 | 8.92E-37 | 0.67308 | 2.9088 | 6.63E-12 | 0.72 |
| HIST2H2AA3 | 8337   | 2.3231 | 5.99E-17 | 0.482759 | 2.0284 | 3.81E-27 | 0.45192 | 2.9133 | 4.51E-24 | 0.72 |
| H2AFX      | 3014   | 2.1307 | 1.48E-28 | 0.413793 | 2.3559 | 2.77E-60 | 0.58654 | 2.6416 | 5.47E-33 | 0.72 |
| GBX2       | 2637   | NA     | NA       | NA       | 2.1465 | 3.47E-22 | 0.67308 | 2.0881 | 5.75E-19 | 0.76 |
| SLC39A4    | 55630  | NA     | NA       | NA       | 2.0328 | 7.18E-38 | 0.39423 | 2.3764 | 3.15E-17 | 0.72 |

Supplementary Table 2b. Down regulated genes in 70% of TNBC patients

| Down regulated genes |        | Stage I |          |           | Stage II |          |             | Stage III |          |           |
|----------------------|--------|---------|----------|-----------|----------|----------|-------------|-----------|----------|-----------|
| GeneName             | GeneID | FC      | FDR      | frequency | FC       | FDR      | frequency   | FC        | FDR      | frequency |
| SCN4B                | 6330   | -3.8108 | 1.91E-56 | 1         | -4.1333  | 3.25E-71 | 0.932692308 | -3.455    | 6.41E-36 | 0.8       |
| FIGF                 | 2277   | -6.5493 | 1.95E-53 | 1         | -6.6462  | 1.13E-86 | 1           | -5.905    | 3.49E-40 | 0.96      |
| TGFBR3               | 7049   | -3.8102 | 2.18E-52 | 1         | -3.8561  | 5.79E-56 | 0.855769231 | -3.346    | 1.54E-31 | 0.8       |
| NOVA1                | 4857   | -4.7897 | 1.25E-51 | 1         | -5.1405  | 9.83E-70 | 0.971153846 | -4.857    | 2.06E-38 | 0.88      |
| SDPR                 | 8436   | -5.3104 | 1.50E-51 | 1         | -5.7932  | 2.15E-84 | 0.980769231 | -4.547    | 6.88E-36 | 0.88      |
| CA4                  | 762    | -7.41   | 1.53E-46 | 1         | -8.0526  | 1.03E-97 | 1           | -7.035    | 2.68E-38 | 0.96      |
| ADAMTS5              | 11096  | -3.5081 | 1.37E-45 | 1         | -3.3096  | 4.59E-60 | 0.913461538 | -3.258    | 6.32E-31 | 0.8       |
| CD300LG              | 146894 | -6.7673 | 1.72E-45 | 1         | -7.6642  | 3.12E-79 | 1           | -6.532    | 1.50E-38 | 0.96      |
| FXYD1                | 5348   | -5.105  | 1.18E-43 | 1         | -5.8756  | 5.91E-69 | 0.961538462 | -4.703    | 1.77E-35 | 0.88      |
| SCN2B                | 6327   | -5.0377 | 9.99E-42 | 1         | -5.519   | 5.78E-74 | 0.980769231 | -5.038    | 3.10E-32 | 0.88      |
| PDE2A                | 5138   | -3.8844 | 3.34E-41 | 1         | -4.2627  | 1.73E-72 | 0.971153846 | -3.465    | 1.54E-29 | 0.88      |
| MAB21L1              | 4081   | -3.8366 | 3.34E-40 | 1         | -4.5394  | 2.86E-65 | 0.923076923 | -4.043    | 1.35E-26 | 0.84      |
| MYH11                | 4629   | -5.1969 | 3.73E-40 | 1         | -5.599   | 1.38E-61 | 0.971153846 | -4.395    | 1.75E-26 | 0.84      |
| LOC572558            | 572558 | -4.1552 | 6.86E-40 | 1         | -4.0255  | 8.81E-74 | 0.980769231 | -3.637    | 1.88E-27 | 0.88      |
| SCARA5               | 286133 | -5.9383 | 3.21E-39 | 1         | -6.3186  | 5.48E-65 | 0.990384615 | -5.601    | 1.94E-30 | 0.92      |
| ABCA8                | 10351  | -5.8626 | 8.06E-38 | 1         | -6.6605  | 3.33E-61 | 1           | -5.643    | 7.48E-30 | 0.96      |
| FGF10                | 2255   | -4.6468 | 3.60E-37 | 1         | -4.8801  | 2.73E-63 | 0.923076923 | -4.868    | 1.77E-35 | 0.96      |
| BTNL9                | 153579 | -4.9242 | 1.12E-36 | 1         | -5.3742  | 9.61E-68 | 0.971153846 | -4.509    | 5.01E-30 | 0.92      |
| MEOX2                | 4223   | -3.4534 | 2.37E-36 | 1         | -4.2199  | 6.80E-46 | 0.875       | -2.96     | 5.01E-22 | 0.76      |
| TNXB                 | 7148   | -5.0447 | 6.09E-36 | 1         | -5.4724  | 5.46E-70 | 0.980769231 | -4.565    | 7.16E-28 | 0.92      |
| ABCA9                | 10350  | -4.8609 | 7.43E-36 | 1         | -5.7108  | 3.15E-70 | 1           | -4.738    | 2.88E-29 | 0.96      |
| OGN                  | 4969   | -5.0294 | 2.53E-35 | 1         | -6.0827  | 3.68E-55 | 0.932692308 | -5.358    | 2.65E-28 | 0.88      |
| CCL14                | 6358   | -4.6713 | 1.05E-34 | 1         | -5.5794  | 6.03E-59 | 0.951923077 | -3.962    | 3.67E-25 | 0.84      |
| LRRN4CL              | 221091 | -4.344  | 2.08E-34 | 1         | -4.9705  | 1.05E-68 | 0.971153846 | -3.985    | 3.31E-26 | 0.84      |
| CPA1                 | 1357   | -4.806  | 2.89E-34 | 1         | -4.7328  | 1.06E-69 | 0.980769231 | -4.332    | 8.50E-27 | 1         |
| BMX                  | 660    | -4.193  | 5.61E-34 | 1         | -4.5601  | 2.72E-53 | 0.894230769 | -3.635    | 3.09E-21 | 0.76      |

|          |        |         |          |   |         |          |             |        |          |      |
|----------|--------|---------|----------|---|---------|----------|-------------|--------|----------|------|
| GDF10    | 2662   | -4.8643 | 5.62E-34 | 1 | -4.9746 | 1.95E-52 | 0.951923077 | -4.778 | 2.29E-27 | 0.92 |
| INMT     | 11185  | -3.8249 | 5.88E-34 | 1 | -4.0761 | 3.55E-56 | 0.903846154 | -2.968 | 1.18E-20 | 0.8  |
| ANGPTL1  | 9068   | -4.3274 | 7.03E-34 | 1 | -4.7371 | 2.98E-61 | 0.980769231 | -3.947 | 3.33E-25 | 0.84 |
| AVPR2    | 554    | -3.8072 | 1.19E-33 | 1 | -4.172  | 8.91E-62 | 0.932692308 | -3.386 | 4.34E-26 | 0.8  |
| ITIH5    | 80760  | -4.4513 | 5.03E-33 | 1 | -4.7628 | 4.37E-59 | 0.971153846 | -4.132 | 1.46E-27 | 0.92 |
| TNMD     | 64102  | -5.6287 | 1.69E-31 | 1 | -5.6124 | 1.60E-46 | 0.951923077 | -5.007 | 3.66E-24 | 0.96 |
| PDK4     | 5166   | -4.4624 | 1.15E-30 | 1 | -4.9479 | 5.11E-60 | 0.990384615 | -4.116 | 4.20E-22 | 0.92 |
| IGFBP6   | 3489   | -3.6049 | 2.43E-30 | 1 | -3.8353 | 1.00E-54 | 0.942307692 | -3.011 | 3.28E-19 | 0.84 |
| GRIA1    | 2890   | -5.0845 | 3.18E-30 | 1 | -4.9695 | 2.32E-60 | 0.971153846 | -4.177 | 1.31E-19 | 0.88 |
| TMEM178  | 130733 | -3.8421 | 3.67E-30 | 1 | -3.5816 | 3.14E-46 | 0.884615385 | -3.127 | 8.80E-18 | 0.84 |
| FHL5     | 9457   | -3.626  | 3.14E-29 | 1 | -4.1404 | 4.44E-55 | 0.942307692 | -2.895 | 7.95E-18 | 0.92 |
| CHRD1    | 91851  | -4.8525 | 5.81E-29 | 1 | -4.8388 | 1.62E-50 | 0.980769231 | -5.024 | 1.23E-23 | 0.96 |
| ABCB5    | 340273 | -4.78   | 9.38E-29 | 1 | -5.5278 | 1.73E-63 | 0.971153846 | -4.828 | 1.05E-24 | 0.88 |
| LRRC2    | 79442  | -3.1687 | 1.26E-28 | 1 | -3.5468 | 1.47E-52 | 0.951923077 | -3.412 | 5.41E-25 | 0.92 |
| CD36     | 948    | -5.0768 | 7.10E-28 | 1 | -5.8328 | 8.50E-64 | 1           | -4.505 | 6.65E-23 | 0.96 |
| CLEC3B   | 7123   | -4.2017 | 8.69E-28 | 1 | -4.6535 | 5.00E-57 | 0.961538462 | -3.622 | 1.96E-19 | 0.92 |
| MYOC     | 4653   | -7.1815 | 1.81E-27 | 1 | -6.9666 | 4.00E-60 | 1           | -6.468 | 2.22E-20 | 1    |
| NPR1     | 4881   | -3.7097 | 3.47E-27 | 1 | -3.7884 | 2.28E-53 | 0.961538462 | -3.072 | 7.59E-19 | 0.92 |
| GPR146   | 115330 | -2.907  | 6.47E-27 | 1 | -3.1415 | 1.99E-62 | 0.980769231 | -2.694 | 3.48E-20 | 0.84 |
| CASQ2    | 845    | -4.1983 | 7.19E-27 | 1 | -4.7294 | 1.11E-50 | 0.971153846 | -3.411 | 1.53E-16 | 0.88 |
| AQP7     | 364    | -6.1928 | 9.57E-27 | 1 | -7.5977 | 1.85E-66 | 1           | -5.621 | 9.12E-21 | 0.96 |
| HRC      | 3270   | -3.1397 | 1.72E-26 | 1 | -3.3029 | 4.42E-50 | 0.951923077 | -2.319 | 7.40E-15 | 0.88 |
| KIAA0408 | 9729   | -6.6013 | 1.80E-26 | 1 | -6.8282 | 2.24E-58 | 1           | -6.33  | 4.47E-22 | 0.96 |
| ADH1B    | 125    | -7.1795 | 2.30E-26 | 1 | -9.0403 | 3.61E-52 | 1           | -7.433 | 2.51E-24 | 1    |
| HEPACAM  | 220296 | -5.4683 | 2.50E-26 | 1 | -6.2266 | 2.17E-60 | 0.990384615 | -5.191 | 8.15E-22 | 1    |
| FABP4    | 2167   | -6.3587 | 2.87E-26 | 1 | -7.4882 | 2.74E-48 | 0.971153846 | -5.831 | 1.09E-20 | 0.96 |
| ACACB    | 32     | -4.029  | 5.80E-26 | 1 | -4.4734 | 8.06E-66 | 1           | -4.059 | 9.35E-24 | 1    |
| AQP7P1   | 375719 | -5.5551 | 6.01E-26 | 1 | -6.1415 | 3.77E-61 | 1           | -5.648 | 9.43E-24 | 1    |
| EBF1     | 1879   | -3.1335 | 8.48E-26 | 1 | -3.7027 | 3.22E-54 | 0.951923077 | -2.995 | 7.97E-20 | 0.84 |



|           |        |         |          |   |         |          |             |        |          |      |
|-----------|--------|---------|----------|---|---------|----------|-------------|--------|----------|------|
| TIMP4     | 7079   | -5.8424 | 1.95E-25 | 1 | -6.401  | 1.72E-56 | 1           | -5.328 | 1.69E-19 | 0.96 |
| CES1      | 1066   | -5.1909 | 3.35E-25 | 1 | -5.4852 | 1.66E-48 | 0.971153846 | -4.518 | 2.03E-17 | 0.96 |
| MMRN1     | 22915  | -4.9549 | 5.72E-25 | 1 | -5.5729 | 4.93E-51 | 0.971153846 | -4.252 | 9.00E-18 | 0.88 |
| LRRN3     | 54674  | -3.344  | 1.06E-24 | 1 | -3.6596 | 6.35E-44 | 0.903846154 | -3.661 | 9.25E-22 | 0.88 |
| HSD17B13  | 345275 | -5.0593 | 1.10E-24 | 1 | -5.5354 | 2.88E-59 | 0.990384615 | -5.413 | 3.57E-23 | 1    |
| GLYAT     | 10249  | -6.5217 | 4.29E-24 | 1 | -7.27   | 6.65E-64 | 1           | -6.728 | 1.77E-22 | 1    |
| PDE8B     | 8622   | -3.4241 | 5.51E-24 | 1 | -3.577  | 1.61E-41 | 0.932692308 | -3.445 | 6.07E-19 | 0.8  |
| KCNE1     | 3753   | -4.4069 | 6.11E-24 | 1 | -4.2467 | 3.16E-44 | 0.961538462 | -3.824 | 4.72E-16 | 0.96 |
| LYVE1     | 10894  | -4.6943 | 6.11E-24 | 1 | -5.0627 | 5.49E-54 | 0.971153846 | -4.415 | 2.25E-18 | 0.96 |
| PLIN4     | 729359 | -6.3833 | 9.29E-24 | 1 | -7.1417 | 9.93E-54 | 0.980769231 | -5.894 | 1.02E-19 | 0.96 |
| PLIN1     | 5346   | -6.7001 | 1.21E-23 | 1 | -8.2119 | 2.67E-57 | 1           | -6.482 | 3.58E-20 | 1    |
| ACSM5     | 54988  | -4.4308 | 1.54E-23 | 1 | -4.9084 | 7.37E-54 | 1           | -4.138 | 8.70E-20 | 0.96 |
| TUSC5     | 286753 | -6.9683 | 3.82E-23 | 1 | -8.3242 | 1.86E-56 | 1           | -6.889 | 1.56E-20 | 1    |
| GPD1      | 2819   | -6.5449 | 5.10E-23 | 1 | -7.4312 | 2.26E-58 | 1           | -6.159 | 3.71E-20 | 1    |
| AOC3      | 8639   | -4.0826 | 5.63E-23 | 1 | -4.5034 | 4.40E-56 | 1           | -3.726 | 5.08E-18 | 0.92 |
| ITGA7     | 3679   | -3.8256 | 6.23E-23 | 1 | -3.6951 | 1.29E-44 | 0.932692308 | -3.039 | 7.80E-15 | 0.8  |
| LOC283392 | 283392 | -5.8579 | 9.31E-23 | 1 | -6.6172 | 1.69E-61 | 1           | -5.6   | 4.10E-18 | 0.96 |
| PI16      | 221476 | -5.0366 | 9.76E-23 | 1 | -5.8023 | 4.16E-46 | 0.951923077 | -4.898 | 5.70E-17 | 0.84 |
| FHL1      | 2273   | -4.3886 | 1.11E-22 | 1 | -4.8762 | 1.47E-54 | 1           | -4.211 | 1.95E-18 | 0.96 |
| DEFB132   | 400830 | -6.2968 | 2.23E-22 | 1 | -6.889  | 1.94E-62 | 1           | -6.123 | 1.08E-18 | 0.96 |
| LEP       | 3952   | -7.2176 | 5.13E-22 | 1 | -8.2675 | 5.29E-56 | 1           | -7.378 | 3.81E-20 | 1    |
| HBB       | 3043   | -5.3729 | 6.00E-22 | 1 | -5.1295 | 2.39E-42 | 0.980769231 | -3.76  | 6.50E-11 | 0.96 |
| TNNT3     | 7140   | -4.7536 | 6.52E-22 | 1 | -4.6903 | 1.04E-34 | 0.990384615 | -4.126 | 2.21E-16 | 1    |
| CIDEC     | 63924  | -6.341  | 1.62E-21 | 1 | -7.7346 | 7.15E-57 | 0.990384615 | -6.727 | 2.05E-20 | 1    |
| C14orf180 | 400258 | -6.0508 | 2.03E-21 | 1 | -6.8936 | 1.26E-55 | 0.980769231 | -6.079 | 8.66E-20 | 1    |
| ADRA1A    | 148    | -4.1217 | 2.35E-21 | 1 | -4.3117 | 5.34E-46 | 0.971153846 | -4.452 | 2.52E-21 | 1    |
| CRHBP     | 1393   | -4.0722 | 5.24E-21 | 1 | -4.2681 | 7.81E-48 | 0.990384615 | -3.578 | 6.05E-15 | 1    |
| ADIPOQ    | 9370   | -6.9671 | 6.25E-21 | 1 | -8.8911 | 2.72E-48 | 1           | -7.023 | 1.92E-18 | 1    |
| LIPE      | 3991   | -4.952  | 7.20E-21 | 1 | -5.4958 | 7.13E-52 | 0.980769231 | -4.793 | 4.83E-18 | 1    |

|          |        |         |          |   |         |          |             |        |          |      |
|----------|--------|---------|----------|---|---------|----------|-------------|--------|----------|------|
| SRL      | 6345   | -2.7089 | 1.21E-20 | 1 | -2.789  | 2.25E-30 | 0.951923077 | -2.389 | 3.20E-14 | 0.96 |
| APOB     | 338    | -5.2006 | 2.70E-20 | 1 | -5.7864 | 3.71E-52 | 1           | -5.461 | 1.15E-18 | 0.96 |
| DPT      | 1805   | -3.6856 | 2.89E-20 | 1 | -4.1365 | 1.32E-44 | 0.990384615 | -3.756 | 1.13E-16 | 0.96 |
| HBA2     | 3040   | -4.9569 | 4.63E-20 | 1 | -4.4606 | 3.84E-38 | 0.980769231 | -3.119 | 1.84E-08 | 0.84 |
| GPAM     | 57678  | -3.938  | 6.31E-20 | 1 | -4.0358 | 4.93E-51 | 1           | -3.965 | 1.55E-17 | 1    |
| KCNIP2   | 30819  | -5.0072 | 1.24E-19 | 1 | -5.4724 | 7.01E-53 | 1           | -5.002 | 5.06E-18 | 1    |
| RDH5     | 5959   | -4.1018 | 1.39E-19 | 1 | -4.5383 | 4.81E-50 | 0.990384615 | -4.176 | 1.08E-17 | 1    |
| LCN6     | 158062 | -2.9899 | 2.37E-19 | 1 | -3.0467 | 3.45E-45 | 0.971153846 | -2.418 | 6.74E-11 | 0.76 |
| CLDN19   | 149461 | -5.2289 | 3.73E-19 | 1 | -5.4749 | 1.97E-44 | 0.961538462 | -4.854 | 1.50E-14 | 0.92 |
| RBP4     | 5950   | -5.2939 | 5.45E-19 | 1 | -5.8323 | 1.24E-41 | 0.971153846 | -5.493 | 5.16E-17 | 0.96 |
| LOC90586 | 90586  | -2.8591 | 5.46E-19 | 1 | -2.8789 | 9.73E-45 | 0.961538462 | -2.683 | 1.00E-14 | 0.92 |
| AQPEP    | 206338 | -4.8668 | 6.43E-19 | 1 | -5.2668 | 7.32E-50 | 1           | -5.014 | 2.45E-16 | 0.96 |
| SGCG     | 6445   | -4.7605 | 7.12E-19 | 1 | -4.9102 | 3.78E-46 | 0.980769231 | -5.211 | 5.14E-19 | 1    |
| PYGM     | 5837   | -3.7239 | 1.05E-18 | 1 | -3.9472 | 7.42E-48 | 1           | -3.212 | 1.55E-13 | 1    |
| FAM180B  | 399888 | -4.0821 | 1.46E-18 | 1 | -3.6825 | 9.28E-34 | 0.903846154 | -3.578 | 1.75E-13 | 0.92 |
| GLRA4    | 441509 | -3.6159 | 1.65E-18 | 1 | -3.5623 | 5.41E-46 | 0.980769231 | -3.489 | 2.06E-15 | 1    |
| MRAP     | 56246  | -6.2038 | 2.44E-18 | 1 | -6.9524 | 4.45E-49 | 0.980769231 | -5.881 | 4.23E-15 | 1    |
| PCK1     | 5105   | -6.2822 | 3.71E-18 | 1 | -7.1138 | 1.88E-47 | 0.980769231 | -6.02  | 2.95E-15 | 1    |
| ACVR1C   | 130399 | -4.5472 | 6.70E-18 | 1 | -5.2993 | 1.30E-48 | 0.990384615 | -4.8   | 4.29E-17 | 1    |
| GABRA2   | 2555   | -3.4076 | 1.19E-17 | 1 | -3.5934 | 1.14E-41 | 0.932692308 | -3.608 | 1.59E-16 | 0.92 |
| CPB1     | 1360   | -5.9033 | 3.17E-17 | 1 | -6.4946 | 4.58E-41 | 0.990384615 | -5.159 | 9.25E-12 | 0.88 |
| HSPB7    | 27129  | -4.671  | 3.21E-17 | 1 | -5.4136 | 7.36E-47 | 1           | -4.667 | 4.55E-15 | 0.96 |
| FRMD1    | 79981  | -4.2005 | 8.92E-17 | 1 | -4.59   | 7.41E-43 | 0.980769231 | -4.421 | 2.71E-16 | 0.96 |
| SLC19A3  | 80704  | -4.6494 | 1.72E-16 | 1 | -5.1104 | 2.26E-42 | 1           | -4.61  | 1.88E-14 | 0.96 |
| LOC55908 | 55908  | -4.4672 | 2.26E-16 | 1 | -4.7384 | 8.07E-46 | 0.990384615 | -4.451 | 2.00E-14 | 0.96 |
| SLC14A2  | 8170   | -4.0078 | 2.63E-16 | 1 | -4.217  | 8.37E-42 | 0.990384615 | -3.571 | 1.12E-11 | 0.92 |
| TRDN     | 10345  | -4.8923 | 2.71E-16 | 1 | -4.3835 | 1.05E-30 | 0.990384615 | -3.823 | 1.28E-09 | 1    |
| LGALS12  | 85329  | -4.9533 | 5.47E-16 | 1 | -6.0588 | 2.18E-45 | 0.971153846 | -4.802 | 8.11E-15 | 1    |
| SLC7A3   | 84889  | -4.7559 | 1.18E-15 | 1 | -4.4813 | 2.93E-31 | 0.932692308 | -4.294 | 5.17E-11 | 0.84 |

|           |           |         |          |   |         |          |             |        |             |      |
|-----------|-----------|---------|----------|---|---------|----------|-------------|--------|-------------|------|
| KLB       | 152831    | -4.0578 | 1.19E-15 | 1 | -4.6703 | 6.29E-45 | 1           | -4.472 | 1.18E-15    | 1    |
| HBA1      | 3039      | -5.8625 | 2.62E-15 | 1 | -6.0248 | 1.11E-33 | 0.980769231 | -4.149 | 2.08E-07    | 0.88 |
| PKHD1L1   | 93035     | -3.6322 | 5.77E-15 | 1 | -3.5905 | 1.51E-28 | 0.913461538 | -4.205 | 1.40E-15    | 0.92 |
| FAM196B   | 100131897 | -4.0393 | 8.28E-15 | 1 | -4.2942 | 3.20E-33 | 0.942307692 | -4.239 | 3.39E-13    | 0.92 |
| AQP7P3    | 441432    | -3.6603 | 5.16E-14 | 1 | -3.9877 | 2.26E-40 | 0.990384615 | -3.345 | 9.44E-11    | 1    |
| KCNC2     | 3747      | -4.6892 | 1.02E-13 | 1 | -4.8142 | 8.98E-37 | 0.990384615 | -4.448 | 5.60E-11    | 0.96 |
| NTS       | 4922      | -4.4272 | 2.33E-13 | 1 | -3.4231 | 6.73E-19 | 0.913461538 | -2.653 | 7.95E-05    | 0.88 |
| LHCGR     | 3973      | -3.5234 | 4.54E-13 | 1 | -3.7289 | 2.57E-38 | 0.990384615 | -3.516 | 2.24E-11    | 0.96 |
| OXTR      | 5021      | -4.7748 | 4.55E-13 | 1 | -4.8471 | 4.03E-33 | 0.971153846 | -4.695 | 5.52E-11    | 0.96 |
| GYG2      | 8908      | -3.351  | 5.45E-13 | 1 | -3.3622 | 1.35E-30 | 0.990384615 | -3.302 | 2.71E-11    | 1    |
| MYH1      | 4619      | -4.0379 | 7.09E-13 | 1 | -4.3674 | 9.36E-39 | 1           | -3.847 | 1.66E-10    | 1    |
| GPR144    | 347088    | -4.4207 | 1.36E-12 | 1 | -4.5025 | 1.26E-34 | 0.980769231 | -3.996 | 1.80E-09    | 0.96 |
| TP53AIP1  | 63970     | -3.6599 | 1.38E-12 | 1 | -3.3982 | 3.80E-26 | 0.884615385 | -2.757 | 5.34E-07    | 0.84 |
| SMYD1     | 150572    | -4.8108 | 2.95E-12 | 1 | -4.5385 | 9.19E-26 | 0.951923077 | -5.493 | 1.34E-12    | 0.96 |
| HMGCS2    | 3158      | -6.1116 | 4.39E-12 | 1 | -7.098  | 5.98E-33 | 0.961538462 | -4.978 | 1.37E-07    | 0.84 |
| EPB42     | 2038      | -3.908  | 4.47E-12 | 1 | -4.1503 | 9.67E-33 | 0.961538462 | -3.858 | 1.14E-10    | 1    |
| UGT2B4    | 7363      | -2.8436 | 2.14E-11 | 1 | -2.843  | 7.70E-29 | 0.971153846 | -2.361 | 5.33E-07    | 0.8  |
| ITIH2     | 3698      | -4.2524 | 7.58E-11 | 1 | -4.4025 | 2.33E-30 | 0.980769231 | -4.325 | 8.49E-10    | 0.96 |
| MYOZ2     | 51778     | -2.1536 | 7.78E-11 | 1 | -2.4448 | 3.69E-30 | 0.990384615 | NA     | NA          | NA   |
| CSF3      | 1440      | -3.6863 | 1.00E-10 | 1 | -3.1602 | 3.50E-20 | 0.951923077 | -2.209 | 0.000590777 | 0.84 |
| CAV3      | 859       | -2.0384 | 1.30E-10 | 1 | NA      | NA       | NA          | NA     | NA          | NA   |
| CST9      | 128822    | -3.8442 | 2.52E-10 | 1 | -3.6015 | 4.22E-24 | 0.971153846 | -2.97  | 1.18E-05    | 0.92 |
| SLC22A12  | 116085    | -2.9215 | 4.29E-10 | 1 | -2.9589 | 1.22E-28 | 0.990384615 | -2.947 | 4.24E-09    | 1    |
| LOC729467 | 729467    | -2.2848 | 5.39E-09 | 1 | NA      | NA       | NA          | -2.155 | 2.65E-07    | 1    |
| GYS2      | 2998      | -3.1287 | 7.65E-09 | 1 | -3.086  | 7.27E-23 | 0.980769231 | -3.157 | 5.89E-08    | 1    |
| DES       | 1674      | -3.032  | 1.97E-08 | 1 | -3.455  | 2.41E-20 | 0.980769231 | -2.598 | 1.54E-05    | 0.96 |
| AMPD1     | 270       | -2.938  | 2.68E-08 | 1 | -2.4211 | 3.82E-13 | 0.961538462 | -2.696 | 3.56E-06    | 0.96 |
| HBG1      | 3047      | -2.4553 | 9.21E-08 | 1 | -2.2201 | 9.36E-18 | 0.980769231 | NA     | NA          | NA   |
| PDE3B     | 5140      | -2.4937 | 2.18E-07 | 1 | -2.6911 | 4.17E-19 | 0.961538462 | -3.122 | 3.89E-09    | 0.96 |

|          |        |         |          |           |         |          |             |        |          |      |
|----------|--------|---------|----------|-----------|---------|----------|-------------|--------|----------|------|
| ARHGAP36 | 158763 | -3.9528 | 4.05E-07 | 1         | -4.3261 | 4.05E-20 | 0.971153846 | -3.769 | 9.20E-06 | 0.92 |
| ALAS2    | 212    | -2.2372 | 1.11E-06 | 1         | -2.21   | 2.80E-17 | 0.980769231 | NA     | NA       | NA   |
| MYH2     | 4620   | -2.048  | 8.30E-06 | 1         | -2.1016 | 8.96E-17 | 1           | NA     | NA       | NA   |
| PAMR1    | 25891  | -4.5922 | 3.18E-47 | 0.9655172 | -4.8376 | 3.33E-76 | 0.971153846 | -4.218 | 7.46E-33 | 0.88 |
| SSTR1    | 6751   | -4.5347 | 1.37E-46 | 0.9655172 | -4.5204 | 1.06E-56 | 0.913461538 | -3.548 | 1.19E-23 | 0.8  |
| PGM5     | 5239   | -4.2498 | 6.64E-46 | 0.9655172 | -4.4939 | 1.35E-61 | 0.913461538 | -3.63  | 1.33E-28 | 0.84 |
| ABCA10   | 10349  | -4.8242 | 2.57E-41 | 0.9655172 | -5.3367 | 9.96E-79 | 0.980769231 | -4.912 | 3.48E-35 | 0.92 |
| RERGL    | 79785  | -4.8153 | 7.48E-40 | 0.9655172 | -5.2222 | 2.95E-50 | 0.875       | -4     | 7.11E-21 | 0.8  |
| ALDH1A2  | 8854   | -4.0688 | 7.48E-40 | 0.9655172 | -4.4592 | 2.50E-62 | 0.932692308 | -3.922 | 3.89E-27 | 0.84 |
| GPIHBP1  | 338328 | -5.0231 | 7.97E-40 | 0.9655172 | -5.5069 | 5.73E-70 | 0.961538462 | -3.953 | 7.51E-27 | 0.88 |
| ARHGAP20 | 57569  | -3.8031 | 1.71E-38 | 0.9655172 | -4.3218 | 2.26E-66 | 0.971153846 | -3.791 | 1.58E-32 | 0.88 |
| AGTR1    | 185    | -4.4639 | 1.34E-37 | 0.9655172 | -4.9327 | 1.75E-70 | 0.971153846 | -4.238 | 1.47E-27 | 0.84 |
| CTTNBP2  | 83992  | -3.5613 | 4.44E-37 | 0.9655172 | -3.9209 | 8.27E-50 | 0.875       | -3.896 | 2.99E-29 | 0.76 |
| CAPN11   | 11131  | -3.9465 | 5.42E-37 | 0.9655172 | -4.1285 | 5.96E-63 | 0.942307692 | -3.393 | 5.27E-25 | 0.88 |
| LRRC3B   | 116135 | -4.4968 | 1.83E-36 | 0.9655172 | -4.3839 | 3.64E-59 | 0.923076923 | -4.171 | 2.02E-27 | 0.88 |
| SLC17A7  | 57030  | -3.7361 | 8.05E-36 | 0.9655172 | -3.5367 | 2.96E-51 | 0.903846154 | -3.364 | 6.82E-27 | 0.88 |
| CAV1     | 857    | -3.568  | 6.78E-33 | 0.9655172 | -3.7413 | 1.31E-61 | 0.932692308 | -2.87  | 1.86E-21 | 0.8  |
| ATP1A2   | 477    | -6.1342 | 1.51E-32 | 0.9655172 | -7.9079 | 1.04E-82 | 1           | -6.337 | 1.49E-30 | 1    |
| SLC16A12 | 387700 | -4.4035 | 1.86E-32 | 0.9655172 | -4.4456 | 7.37E-61 | 0.961538462 | -3.972 | 1.29E-25 | 0.88 |
| GHR      | 2690   | -4.1547 | 4.95E-31 | 0.9655172 | -4.3422 | 2.60E-53 | 0.942307692 | -3.917 | 5.58E-25 | 0.96 |
| SEMA3G   | 56920  | -3.567  | 6.12E-31 | 0.9655172 | -4.0102 | 1.79E-62 | 0.961538462 | -3.359 | 1.06E-23 | 0.92 |
| ESR1     | 2099   | -4.5273 | 6.86E-31 | 0.9655172 | -5.075  | 3.00E-53 | 0.932692308 | -3.649 | 2.37E-18 | 0.8  |
| IGSF10   | 285313 | -3.8107 | 1.15E-29 | 0.9655172 | -3.7435 | 2.17E-41 | 0.826923077 | -4.192 | 3.03E-32 | 0.92 |
| PGR      | 5241   | -5.198  | 1.67E-29 | 0.9655172 | -5.721  | 2.65E-55 | 0.951923077 | -4.751 | 5.94E-19 | 0.88 |
| CDO1     | 1036   | -4.2436 | 6.38E-29 | 0.9655172 | -4.5918 | 4.54E-47 | 0.903846154 | -4.32  | 1.82E-22 | 0.92 |
| C18orf34 | 374864 | -3.7272 | 1.06E-28 | 0.9655172 | -4.4263 | 1.10E-65 | 0.971153846 | -3.341 | 3.90E-24 | 0.8  |
| FREM1    | 158326 | -3.9525 | 1.38E-28 | 0.9655172 | -4.3897 | 7.43E-53 | 0.913461538 | -4.147 | 3.54E-26 | 0.88 |
| SVEP1    | 79987  | -4.0355 | 1.88E-28 | 0.9655172 | -4.7349 | 1.60E-54 | 0.980769231 | -4.273 | 3.67E-23 | 0.92 |
| LEPR     | 3953   | -3.1295 | 2.99E-28 | 0.9655172 | -3.8022 | 1.60E-63 | 0.961538462 | -3.119 | 8.60E-23 | 0.84 |

|           |        |         |          |           |         |          |             |        |          |      |
|-----------|--------|---------|----------|-----------|---------|----------|-------------|--------|----------|------|
| ASPA      | 443    | -4.0176 | 3.43E-28 | 0.9655172 | -4.7399 | 4.31E-62 | 0.990384615 | -4.49  | 1.97E-26 | 0.96 |
| DNAH9     | 1770   | -3.413  | 6.20E-28 | 0.9655172 | -3.918  | 2.43E-49 | 0.923076923 | -3.54  | 3.15E-20 | 0.76 |
| TMEM132C  | 92293  | -5.8393 | 1.43E-27 | 0.9655172 | -7.1923 | 4.23E-65 | 0.980769231 | -6.268 | 2.07E-28 | 1    |
| SLC2A4    | 6517   | -4.6851 | 1.81E-27 | 0.9655172 | -4.941  | 1.33E-56 | 0.990384615 | -4.15  | 1.31E-19 | 1    |
| SCN4A     | 6329   | -3.8789 | 4.81E-27 | 0.9655172 | -4.5696 | 1.54E-56 | 0.961538462 | -3.701 | 4.50E-21 | 0.88 |
| TNS1      | 7145   | -3.1385 | 1.71E-26 | 0.9655172 | -3.3723 | 2.38E-59 | 0.990384615 | -3.166 | 1.88E-23 | 0.92 |
| C10orf116 | 10974  | -3.7601 | 1.71E-25 | 0.9655172 | -4.2743 | 1.74E-48 | 0.923076923 | -3.159 | 1.06E-17 | 0.76 |
| AKAP12    | 9590   | -3.4144 | 2.90E-25 | 0.9655172 | -3.6223 | 2.21E-46 | 0.894230769 | -3.176 | 9.06E-20 | 0.92 |
| GALNTL2   | 117248 | -3.6947 | 6.11E-25 | 0.9655172 | -4.299  | 2.67E-57 | 0.980769231 | -4.131 | 1.10E-23 | 0.88 |
| CKMT2     | 1160   | -3.7721 | 9.99E-25 | 0.9655172 | -3.5693 | 5.51E-35 | 0.942307692 | -3.602 | 4.40E-21 | 1    |
| RGS22     | 26166  | -4.3395 | 1.82E-24 | 0.9655172 | -4.7493 | 1.74E-55 | 0.961538462 | -4     | 3.16E-19 | 0.96 |
| ADH1A     | 124    | -5.5549 | 3.28E-24 | 0.9655172 | -6.5143 | 8.79E-64 | 1           | -6.085 | 7.08E-25 | 1    |
| CFD       | 1675   | -4.443  | 5.16E-24 | 0.9655172 | -4.9691 | 4.41E-55 | 0.961538462 | -3.667 | 6.29E-18 | 0.92 |
| PLAC9     | 219348 | -3.9539 | 7.12E-24 | 0.9655172 | -4.4699 | 3.87E-50 | 0.942307692 | -3.342 | 1.47E-16 | 0.84 |
| ANGPT4    | 51378  | -3.6765 | 1.29E-23 | 0.9655172 | -4.0393 | 3.23E-61 | 0.980769231 | -3.457 | 6.55E-19 | 0.96 |
| HEPN1     | 641654 | -5.2524 | 2.26E-23 | 0.9655172 | -5.9061 | 6.66E-56 | 0.990384615 | -5.211 | 5.77E-21 | 1    |
| MYOM1     | 8736   | -3.5984 | 2.93E-23 | 0.9655172 | -4.2111 | 1.85E-56 | 1           | -3.672 | 1.39E-20 | 0.96 |
| MAP1LC3C  | 440738 | -3.5789 | 8.25E-23 | 0.9655172 | -4.144  | 3.21E-53 | 0.980769231 | -3.646 | 4.37E-21 | 1    |
| PPARG     | 5468   | -3.4642 | 2.40E-22 | 0.9655172 | -3.6443 | 9.80E-49 | 0.971153846 | -2.908 | 3.13E-15 | 0.88 |
| MLXIPL    | 51085  | -4.6441 | 4.96E-22 | 0.9655172 | -4.6961 | 2.00E-44 | 0.951923077 | -4.492 | 5.22E-20 | 1    |
| NAALAD2   | 10003  | -3.0839 | 5.22E-22 | 0.9655172 | -3.1938 | 7.25E-44 | 0.913461538 | -3.454 | 2.93E-23 | 0.96 |
| C1QTNF7   | 114905 | -3.8319 | 6.27E-22 | 0.9655172 | -4.7401 | 4.54E-54 | 0.961538462 | -3.773 | 3.66E-18 | 0.88 |
| B3GALT1   | 8708   | -3.4676 | 7.07E-22 | 0.9655172 | -3.5148 | 1.89E-45 | 0.942307692 | -3.497 | 3.52E-18 | 0.84 |
| CNN1      | 1264   | -3.7413 | 8.43E-22 | 0.9655172 | -4.2299 | 2.58E-45 | 0.923076923 | -3.518 | 1.49E-16 | 0.8  |
| NNAT      | 4826   | -4.1119 | 1.73E-21 | 0.9655172 | -4.7605 | 1.12E-51 | 0.961538462 | -4.302 | 7.03E-20 | 0.96 |
| PDZRN4    | 29951  | -3.155  | 7.09E-21 | 0.9655172 | -3.2233 | 1.05E-34 | 0.846153846 | -3.215 | 4.20E-16 | 0.8  |
| C7orf58   | 79974  | -3.3109 | 1.01E-20 | 0.9655172 | -3.8435 | 1.03E-47 | 0.980769231 | -3.393 | 3.35E-19 | 0.92 |
| GSTM5     | 2949   | -4.4006 | 1.69E-20 | 0.9655172 | -5.2762 | 5.38E-58 | 1           | -4.434 | 3.95E-19 | 0.92 |
| NPY2R     | 4887   | -6.0554 | 2.25E-20 | 0.9655172 | -6.5778 | 2.86E-52 | 0.961538462 | -6.111 | 4.65E-18 | 0.96 |

|            |        |         |          |           |         |          |             |        |          |      |
|------------|--------|---------|----------|-----------|---------|----------|-------------|--------|----------|------|
| PLIN5      | 440503 | -3.6189 | 2.33E-20 | 0.9655172 | -3.8313 | 2.51E-34 | 0.865384615 | -3.179 | 5.90E-15 | 0.8  |
| ELANE      | 1991   | -2.8544 | 2.59E-20 | 0.9655172 | -2.8022 | 7.61E-44 | 0.932692308 | -2.193 | 2.89E-11 | 0.88 |
| SORBS1     | 10580  | -3.2426 | 1.02E-19 | 0.9655172 | -3.645  | 1.88E-51 | 0.980769231 | -3.932 | 7.04E-21 | 0.96 |
| SGK2       | 10110  | -4.0862 | 1.92E-19 | 0.9655172 | -4.3887 | 9.55E-43 | 0.932692308 | -3.649 | 2.55E-14 | 0.92 |
| KLHL33     | 123103 | -2.6015 | 1.44E-18 | 0.9655172 | -2.8716 | 5.49E-49 | 0.990384615 | -2.794 | 1.66E-18 | 1    |
| FLJ37543   | 285668 | -2.5666 | 1.72E-18 | 0.9655172 | -2.5469 | 3.16E-42 | 0.913461538 | -2.519 | 6.16E-16 | 0.88 |
| RXRG       | 6258   | -3.5875 | 1.74E-18 | 0.9655172 | -3.6077 | 1.16E-36 | 0.903846154 | -3.63  | 4.80E-18 | 0.96 |
| CIDEA      | 1149   | -5.7831 | 1.66E-17 | 0.9655172 | -7.0581 | 7.03E-51 | 0.990384615 | -5.976 | 4.92E-18 | 0.96 |
| HEPACAM2   | 253012 | -4.8468 | 7.50E-17 | 0.9655172 | -4.8006 | 5.80E-35 | 0.932692308 | -4.279 | 2.07E-11 | 0.84 |
| ADH4       | 127    | -3.6879 | 6.59E-16 | 0.9655172 | -3.7256 | 1.09E-33 | 0.903846154 | -3.344 | 1.40E-11 | 0.88 |
| C11orf87   | 399947 | -2.5665 | 3.18E-15 | 0.9655172 | -2.2966 | 5.50E-28 | 0.903846154 | NA     | NA       | NA   |
| CA3        | 761    | -3.731  | 5.88E-15 | 0.9655172 | -3.5637 | 8.82E-27 | 0.961538462 | -3.926 | 1.34E-13 | 0.96 |
| PRRT4      | 401399 | -3.8461 | 1.01E-14 | 0.9655172 | -3.8501 | 2.78E-31 | 0.894230769 | -3.284 | 4.18E-11 | 0.96 |
| CITED1     | 4435   | -4.1931 | 1.18E-14 | 0.9655172 | -4.1758 | 1.19E-32 | 0.942307692 | -3.369 | 3.63E-09 | 0.92 |
| NXNL1      | 115861 | -2.457  | 4.81E-14 | 0.9655172 | -2.444  | 4.49E-36 | 0.961538462 | -2.29  | 4.14E-11 | 0.92 |
| CMYA5      | 202333 | -2.9677 | 5.43E-14 | 0.9655172 | -3.2337 | 9.62E-33 | 0.980769231 | -2.626 | 2.63E-11 | 0.96 |
| SLC13A2    | 9058   | -5.27   | 1.66E-13 | 0.9655172 | -4.6085 | 8.07E-22 | 0.903846154 | -4.315 | 3.46E-08 | 0.92 |
| NCRNA00110 | 642976 | -3.5011 | 4.22E-13 | 0.9655172 | -3.6179 | 7.39E-35 | 0.951923077 | -3.273 | 3.12E-10 | 0.88 |
| AGR3       | 155465 | -5.301  | 1.26E-12 | 0.9655172 | -5.4911 | 3.00E-29 | 0.942307692 | -3.88  | 1.65E-06 | 0.8  |
| MYOZ3      | 91977  | -2.0244 | 1.50E-12 | 0.9655172 | -2.0895 | 2.15E-23 | 0.913461538 | NA     | NA       | NA   |
| CYP3A4     | 1576   | -2.304  | 1.78E-12 | 0.9655172 | -2.1947 | 5.98E-28 | 0.875       | -2.109 | 7.27E-09 | 0.92 |
| OR2L13     | 284521 | -2.8386 | 2.12E-12 | 0.9655172 | -2.898  | 4.31E-31 | 0.932692308 | -2.504 | 1.87E-08 | 0.84 |
| ACSM2A     | 123876 | -2.0827 | 9.92E-12 | 0.9655172 | -2.0808 | 4.17E-29 | 0.932692308 | -2.081 | 1.57E-10 | 0.96 |
| SLC7A10    | 56301  | -4.1054 | 2.37E-11 | 0.9655172 | -4.5821 | 3.21E-30 | 0.971153846 | -4.043 | 1.44E-09 | 0.92 |
| PGA3       | 643834 | -3.3127 | 3.65E-11 | 0.9655172 | -3.2112 | 4.94E-26 | 0.942307692 | -2.984 | 9.16E-09 | 0.88 |
| RFX6       | 222546 | -3.3754 | 4.79E-11 | 0.9655172 | -3.5079 | 8.28E-31 | 0.971153846 | -3.377 | 8.88E-10 | 0.96 |
| SGCA       | 6442   | -2.4547 | 2.89E-10 | 0.9655172 | -2.2754 | 3.28E-20 | 0.971153846 | NA     | NA       | NA   |
| GABRA4     | 2557   | -2.5227 | 2.97E-10 | 0.9655172 | -2.3497 | 4.16E-19 | 0.942307692 | -2.32  | 8.64E-08 | 0.88 |
| PLN        | 5350   | -2.044  | 3.92E-10 | 0.9655172 | -2.4584 | 3.42E-25 | 0.875       | NA     | NA       | NA   |

|          |        |         |             |           |         |          |             |        |             |      |
|----------|--------|---------|-------------|-----------|---------|----------|-------------|--------|-------------|------|
| SEL1L2   | 80343  | -2.5282 | 5.91E-10    | 0.9655172 | -2.6795 | 5.89E-30 | 0.980769231 | -2.464 | 1.40E-08    | 1    |
| TAT      | 6898   | -5.6192 | 1.03E-09    | 0.9655172 | -6.8266 | 1.21E-33 | 0.971153846 | -6.006 | 9.44E-10    | 0.96 |
| HHATL    | 57467  | -2.8834 | 1.82E-09    | 0.9655172 | -3.0798 | 5.84E-29 | 0.990384615 | -2.964 | 2.23E-09    | 1    |
| FRMPD2   | 143162 | -3.0032 | 2.87E-09    | 0.9655172 | -3.2564 | 9.48E-28 | 0.990384615 | -2.737 | 9.62E-07    | 0.92 |
| ANGPTL5  | 253935 | -2.9669 | 4.12E-09    | 0.9655172 | -3.3325 | 1.05E-26 | 0.951923077 | -3.29  | 1.47E-09    | 0.96 |
| COL17A1  | 1308   | -4.4047 | 6.84E-09    | 0.9655172 | -4.9554 | 1.66E-24 | 0.942307692 | -3.933 | 2.30E-06    | 0.8  |
| CYP2A7   | 1549   | -2.5004 | 7.45E-09    | 0.9655172 | -2.4518 | 1.54E-20 | 0.971153846 | -2.51  | 7.13E-08    | 0.96 |
| SERPINA6 | 866    | -4.3867 | 1.34E-08    | 0.9655172 | -4.6258 | 7.33E-25 | 0.980769231 | -4.51  | 5.67E-08    | 0.92 |
| TFF1     | 7031   | -4.42   | 1.96E-08    | 0.9655172 | -5.4586 | 8.86E-27 | 0.971153846 | -3.821 | 8.91E-06    | 0.88 |
| C12orf39 | 80763  | -3.4393 | 1.26E-07    | 0.9655172 | -3.9078 | 3.32E-22 | 0.942307692 | -3.939 | 1.83E-08    | 0.96 |
| GLRA3    | 8001   | -3.919  | 2.02E-07    | 0.9655172 | -4.4058 | 3.49E-24 | 0.980769231 | -3.854 | 2.02E-06    | 0.88 |
| ALB      | 213    | -3.9435 | 3.23E-07    | 0.9655172 | -5.3207 | 1.94E-29 | 0.980769231 | -5.19  | 1.62E-09    | 0.88 |
| AADAC    | 13     | -3.2685 | 3.43E-07    | 0.9655172 | -3.7684 | 6.02E-23 | 0.990384615 | -2.845 | 3.87E-05    | 0.96 |
| CSN1S1   | 1446   | -3.1003 | 4.47E-05    | 0.9655172 | -3.5605 | 3.76E-18 | 0.990384615 | -3.583 | 2.47E-06    | 1    |
| CYP1A1   | 1543   | -2.3813 | 0.000241958 | 0.9655172 | -2.5588 | 1.42E-12 | 1           | -2.304 | 0.001165662 | 0.92 |
| ANKRD29  | 147463 | -3.9865 | 1.31E-54    | 0.9310345 | -3.9169 | 7.99E-73 | 0.903846154 | -3.352 | 4.84E-34    | 0.76 |
| C5orf4   | 10826  | -3.2776 | 4.34E-46    | 0.9310345 | -3.6866 | 4.21E-77 | 0.932692308 | -2.94  | 2.82E-33    | 0.72 |
| LMOD1    | 25802  | -3.4699 | 3.93E-44    | 0.9310345 | -4.0914 | 3.91E-68 | 0.913461538 | -3.454 | 3.78E-33    | 0.84 |
| MME      | 4311   | -3.9582 | 3.11E-43    | 0.9310345 | -4.2295 | 1.74E-51 | 0.884615385 | -4.36  | 1.87E-29    | 0.88 |
| MATN2    | 4147   | -3.8837 | 3.96E-42    | 0.9310345 | -3.7282 | 2.08E-57 | 0.826923077 | -2.873 | 1.33E-32    | 0.68 |
| TMTC1    | 83857  | -3.7693 | 2.36E-40    | 0.9310345 | -3.5228 | 5.49E-51 | 0.817307692 | -3.36  | 3.87E-24    | 0.72 |
| SYNPO2   | 171024 | -3.6163 | 7.26E-40    | 0.9310345 | -4.1074 | 1.14E-62 | 0.913461538 | -3.621 | 4.38E-30    | 0.88 |
| ADAM33   | 80332  | -4.3096 | 3.21E-39    | 0.9310345 | -4.9151 | 5.89E-63 | 0.903846154 | -4.089 | 2.23E-30    | 0.8  |
| DACH1    | 1602   | -3.7655 | 2.29E-37    | 0.9310345 | -4.1541 | 5.98E-54 | 0.875       | -3.022 | 1.96E-21    | 0.68 |
| GPC3     | 2719   | -4.777  | 2.30E-37    | 0.9310345 | -4.6822 | 3.89E-54 | 0.913461538 | -4.182 | 1.79E-28    | 0.88 |
| TPRG1    | 285386 | -3.5214 | 2.16E-36    | 0.9310345 | -3.4898 | 7.54E-51 | 0.875       | -3.024 | 4.07E-27    | 0.76 |
| C6orf97  | 80129  | -3.4449 | 8.56E-36    | 0.9310345 | -3.8164 | 1.44E-60 | 0.923076923 | -3.354 | 1.60E-27    | 0.84 |
| AGAP11   | 119385 | -3.6705 | 3.90E-35    | 0.9310345 | -3.8673 | 1.47E-58 | 0.961538462 | -3.488 | 9.57E-28    | 0.88 |
| C16orf89 | 146556 | -4.4412 | 5.61E-34    | 0.9310345 | -5.0848 | 1.68E-50 | 0.875       | -3.787 | 4.45E-23    | 0.76 |

|           |        |         |          |           |         |          |             |        |          |      |
|-----------|--------|---------|----------|-----------|---------|----------|-------------|--------|----------|------|
| DHPSL     | 112817 | -4.3718 | 3.89E-33 | 0.9310345 | -4.0617 | 3.22E-51 | 0.875       | -4.201 | 9.39E-31 | 0.96 |
| MAOA      | 4128   | -5.0447 | 1.23E-32 | 0.9310345 | -5.2931 | 4.23E-58 | 0.980769231 | -4.006 | 1.00E-22 | 0.92 |
| ATOH8     | 84913  | -4.058  | 4.98E-31 | 0.9310345 | -4.0975 | 6.81E-58 | 0.951923077 | -3.468 | 3.78E-26 | 0.84 |
| SCN7A     | 6332   | -4.6974 | 2.14E-30 | 0.9310345 | -5.5958 | 3.02E-64 | 0.951923077 | -4.326 | 1.59E-21 | 0.76 |
| SCN3A     | 6328   | -3.6365 | 2.82E-29 | 0.9310345 | -4.271  | 1.18E-48 | 0.884615385 | -4.075 | 2.02E-26 | 0.84 |
| GFRA1     | 2674   | -4.2153 | 5.30E-29 | 0.9310345 | -5.0604 | 9.53E-42 | 0.875       | -4.363 | 2.95E-20 | 0.76 |
| ZNF676    | 163223 | -3.8019 | 6.05E-29 | 0.9310345 | -3.9296 | 6.08E-47 | 0.855769231 | -3.504 | 2.92E-25 | 0.84 |
| LOC728264 | 728264 | -4.0537 | 6.85E-29 | 0.9310345 | -4.515  | 2.81E-57 | 0.961538462 | -3.674 | 4.18E-20 | 0.8  |
| EBF3      | 253738 | -3.2746 | 5.56E-28 | 0.9310345 | -3.5332 | 4.48E-50 | 0.865384615 | -2.761 | 1.17E-18 | 0.72 |
| CASP12    | 120329 | -2.7496 | 1.82E-27 | 0.9310345 | -2.9212 | 2.00E-59 | 0.923076923 | -2.218 | 2.71E-16 | 0.76 |
| C7orf41   | 222166 | -2.8775 | 1.83E-27 | 0.9310345 | -2.7706 | 7.48E-50 | 0.884615385 | -2.633 | 2.40E-21 | 0.88 |
| CCL16     | 6360   | -2.8336 | 1.94E-27 | 0.9310345 | -3.0064 | 5.10E-57 | 0.884615385 | -2.211 | 1.12E-15 | 0.72 |
| HRASLS5   | 117245 | -4.4742 | 1.95E-26 | 0.9310345 | -4.7576 | 6.50E-44 | 0.903846154 | -4.418 | 1.13E-22 | 0.92 |
| ANGPTL7   | 10218  | -5.8738 | 8.53E-26 | 0.9310345 | -5.7946 | 6.59E-49 | 0.903846154 | -5.696 | 2.90E-23 | 0.92 |
| MYOCD     | 93649  | -3.6054 | 9.12E-26 | 0.9310345 | -4.006  | 4.33E-50 | 0.913461538 | -2.923 | 4.93E-16 | 0.88 |
| COX7A1    | 1346   | -2.9966 | 2.13E-25 | 0.9310345 | -3.3886 | 6.76E-51 | 0.951923077 | -2.913 | 1.43E-19 | 0.84 |
| THRSP     | 7069   | -5.1675 | 5.47E-25 | 0.9310345 | -5.977  | 6.58E-44 | 0.913461538 | -4.773 | 5.62E-18 | 0.84 |
| C4orf49   | 84709  | -2.9422 | 3.04E-24 | 0.9310345 | -2.9645 | 1.13E-42 | 0.875       | -2.575 | 4.77E-16 | 0.8  |
| HSPB6     | 126393 | -4.6104 | 1.63E-23 | 0.9310345 | -5.6383 | 1.41E-61 | 0.990384615 | -4.528 | 2.05E-21 | 0.96 |
| EGR1      | 1958   | -3.2465 | 2.93E-23 | 0.9310345 | -3.4391 | 2.87E-51 | 0.894230769 | -2.667 | 1.27E-14 | 0.76 |
| TRPM3     | 80036  | -3.0012 | 5.32E-23 | 0.9310345 | -2.7697 | 3.64E-43 | 0.855769231 | -2.242 | 1.35E-11 | 0.68 |
| ADCYAP1R1 | 117    | -4.0024 | 5.54E-23 | 0.9310345 | -4.0737 | 1.17E-40 | 0.913461538 | -3.613 | 7.65E-18 | 0.92 |
| GLDN      | 342035 | -3.6221 | 2.27E-22 | 0.9310345 | -3.8568 | 2.49E-46 | 0.913461538 | -2.675 | 1.14E-13 | 0.8  |
| FOSB      | 2354   | -4.6806 | 2.56E-22 | 0.9310345 | -4.9661 | 1.16E-49 | 0.951923077 | -3.889 | 1.51E-15 | 0.88 |
| ALDH1L1   | 10840  | -4.7279 | 5.11E-21 | 0.9310345 | -5.3145 | 3.22E-46 | 0.961538462 | -4.801 | 1.52E-20 | 1    |
| CMA1      | 1215   | -4.3406 | 8.82E-21 | 0.9310345 | -4.4943 | 2.60E-44 | 0.942307692 | -4.059 | 3.63E-16 | 0.92 |
| FZD4      | 8322   | -2.8706 | 2.82E-20 | 0.9310345 | -3.2837 | 1.08E-50 | 0.942307692 | -2.62  | 1.16E-15 | 0.88 |
| FOS       | 2353   | -3.3737 | 2.91E-20 | 0.9310345 | -3.7046 | 2.54E-46 | 0.913461538 | -2.711 | 8.20E-13 | 0.8  |
| EGR3      | 1960   | -3.5579 | 3.43E-20 | 0.9310345 | -3.8637 | 4.23E-42 | 0.923076923 | -2.827 | 2.88E-12 | 0.84 |



|         |        |         |          |           |         |          |             |        |          |      |
|---------|--------|---------|----------|-----------|---------|----------|-------------|--------|----------|------|
| CES4    | 51716  | -4.1524 | 5.75E-20 | 0.9310345 | -4.0824 | 2.26E-40 | 0.951923077 | -3.246 | 5.09E-12 | 0.84 |
| KLF15   | 28999  | -2.8388 | 8.66E-20 | 0.9310345 | -3.1822 | 9.55E-43 | 0.903846154 | -3.455 | 3.45E-20 | 0.84 |
| CYP2A6  | 1548   | -4.3276 | 1.07E-18 | 0.9310345 | -5.1764 | 4.40E-56 | 0.971153846 | -4.542 | 3.09E-21 | 1    |
| LPL     | 4023   | -4.2564 | 1.28E-18 | 0.9310345 | -4.2948 | 3.24E-38 | 0.951923077 | -4.311 | 1.30E-17 | 1    |
| ECM2    | 1842   | -2.847  | 2.19E-18 | 0.9310345 | -3.5996 | 2.47E-47 | 0.990384615 | -2.974 | 6.00E-17 | 0.88 |
| PIWIL2  | 55124  | -2.9186 | 7.06E-18 | 0.9310345 | -2.8556 | 3.16E-26 | 0.903846154 | -2.797 | 3.20E-14 | 0.88 |
| P2RX6   | 9127   | -3.1134 | 1.03E-17 | 0.9310345 | -2.727  | 1.46E-29 | 0.884615385 | -2.736 | 7.44E-13 | 0.88 |
| PFKFB1  | 5207   | -4.348  | 1.03E-17 | 0.9310345 | -4.9884 | 1.34E-49 | 0.980769231 | -4.778 | 3.30E-18 | 0.96 |
| GRIA4   | 2893   | -4.919  | 2.06E-17 | 0.9310345 | -5.6305 | 3.78E-43 | 0.961538462 | -4.822 | 4.66E-14 | 0.92 |
| PAPPA2  | 60676  | -3.4265 | 7.24E-17 | 0.9310345 | -4.1525 | 3.89E-48 | 0.951923077 | -3.575 | 1.82E-15 | 0.88 |
| PPP1R1A | 5502   | -3.7728 | 7.95E-17 | 0.9310345 | -4.2881 | 2.30E-35 | 0.903846154 | -3.673 | 3.48E-14 | 0.8  |
| GPX3    | 2878   | -3.2512 | 1.70E-15 | 0.9310345 | -3.4157 | 1.25E-37 | 0.942307692 | -3.065 | 1.09E-12 | 0.88 |
| MMP27   | 64066  | -2.9755 | 3.23E-15 | 0.9310345 | -3.4913 | 1.83E-45 | 0.971153846 | -3.506 | 3.12E-17 | 0.96 |
| CCDC3   | 83643  | -2.5305 | 3.86E-15 | 0.9310345 | -2.2772 | 6.33E-25 | 0.817307692 | -2.094 | 8.48E-10 | 0.8  |
| CDH12   | 1010   | -2.907  | 1.42E-14 | 0.9310345 | -2.3454 | 3.76E-18 | 0.836538462 | -2.13  | 8.01E-07 | 0.68 |
| BMP3    | 651    | -3.5025 | 1.81E-14 | 0.9310345 | -3.8517 | 7.03E-36 | 0.961538462 | -3.099 | 1.25E-09 | 0.88 |
| LGI1    | 9211   | -2.3087 | 4.72E-14 | 0.9310345 | -2.0998 | 3.22E-20 | 0.865384615 | -2.04  | 1.48E-09 | 0.84 |
| MPPED1  | 758    | -3.0561 | 4.83E-14 | 0.9310345 | -2.91   | 1.79E-28 | 0.884615385 | -2.489 | 4.93E-09 | 0.84 |
| PTPRQ   | 374462 | -3.9717 | 5.31E-14 | 0.9310345 | -4.6913 | 1.32E-41 | 0.980769231 | -4.87  | 4.61E-18 | 1    |
| BPIL1   | 80341  | -4.129  | 5.59E-14 | 0.9310345 | -4.919  | 4.62E-37 | 0.932692308 | -4.404 | 9.87E-13 | 0.8  |
| GRPR    | 2925   | -3.8967 | 8.04E-14 | 0.9310345 | -4.4482 | 4.10E-39 | 0.961538462 | -2.963 | 1.65E-07 | 0.84 |
| TRHDE   | 29953  | -4.1682 | 9.26E-14 | 0.9310345 | -4.6414 | 1.83E-37 | 0.980769231 | -3.62  | 1.10E-09 | 0.84 |
| PEBP4   | 157310 | -3.112  | 3.71E-13 | 0.9310345 | -3.2463 | 6.27E-32 | 0.971153846 | -3.23  | 4.52E-13 | 0.96 |
| GOS2    | 50486  | -3.4904 | 3.81E-13 | 0.9310345 | -3.9587 | 2.12E-35 | 0.951923077 | -3.115 | 9.85E-10 | 0.88 |
| AK5     | 26289  | -3.857  | 7.93E-13 | 0.9310345 | -4.3949 | 1.50E-30 | 0.894230769 | -3.653 | 1.43E-09 | 0.8  |
| PLXNA4  | 91584  | -2.8295 | 8.33E-13 | 0.9310345 | -3.5365 | 5.47E-33 | 0.884615385 | -3.603 | 1.61E-15 | 0.92 |
| C2orf84 | 653140 | -2.4404 | 1.38E-12 | 0.9310345 | -2.6336 | 1.89E-29 | 0.894230769 | -2.402 | 1.19E-10 | 0.92 |
| MUC6    | 4588   | -4.5761 | 1.38E-12 | 0.9310345 | -4.1566 | 1.09E-20 | 0.894230769 | -4.225 | 1.84E-09 | 0.88 |
| CLEC4G  | 339390 | -3.0641 | 1.51E-12 | 0.9310345 | -2.9778 | 2.16E-24 | 0.875       | -2.315 | 1.00E-06 | 0.84 |

|             |           |         |          |           |         |          |             |        |             |      |
|-------------|-----------|---------|----------|-----------|---------|----------|-------------|--------|-------------|------|
| GRIK1       | 2897      | -3.6171 | 1.86E-12 | 0.9310345 | -3.8108 | 1.13E-33 | 0.971153846 | -3.538 | 1.04E-10    | 0.88 |
| TPSG1       | 25823     | -2.5697 | 5.77E-12 | 0.9310345 | -2.7381 | 2.45E-31 | 0.913461538 | -2.693 | 6.85E-12    | 0.92 |
| LOC389033   | 389033    | -3.0595 | 7.32E-12 | 0.9310345 | -3.0141 | 1.58E-29 | 0.932692308 | -2.535 | 3.96E-08    | 0.88 |
| KCNJ3       | 3760      | -2.868  | 1.02E-11 | 0.9310345 | -3.0511 | 2.24E-30 | 0.932692308 | NA     | NA          | NA   |
| AFP         | 174       | -4.4099 | 1.35E-11 | 0.9310345 | -4.6291 | 1.99E-30 | 0.942307692 | -3.379 | 1.43E-06    | 0.84 |
| MRGPRX2     | 117194    | -2.3529 | 2.09E-11 | 0.9310345 | -2.5812 | 1.62E-35 | 0.971153846 | -2.174 | 1.21E-08    | 0.92 |
| CYP4A11     | 1579      | -2.1134 | 3.82E-11 | 0.9310345 | -2.6898 | 1.37E-37 | 0.961538462 | -2.26  | 8.97E-11    | 0.84 |
| GABRG1      | 2565      | -2.0952 | 9.13E-11 | 0.9310345 | NA      | NA       | NA          | NA     | NA          | NA   |
| PENK        | 5179      | -3.5588 | 1.09E-10 | 0.9310345 | -4.2817 | 4.01E-32 | 0.971153846 | -3.64  | 2.45E-11    | 0.96 |
| CT62        | 196993    | -3.2392 | 1.12E-10 | 0.9310345 | -3.9239 | 1.86E-34 | 0.951923077 | -2.899 | 1.19E-07    | 0.8  |
| PAK7        | 57144     | -3.4854 | 3.99E-10 | 0.9310345 | -3.8541 | 6.87E-27 | 0.932692308 | -3.621 | 7.45E-09    | 0.88 |
| DLK1        | 8788      | -4.2361 | 9.14E-10 | 0.9310345 | -4.3843 | 2.43E-17 | 0.875       | -4.803 | 3.11E-11    | 0.96 |
| PDZK1       | 5174      | -3.4181 | 1.08E-09 | 0.9310345 | -3.8523 | 9.70E-28 | 0.951923077 | -3.161 | 2.54E-07    | 0.84 |
| KCNA4       | 3739      | -2.4051 | 1.44E-09 | 0.9310345 | -2.3992 | 9.39E-23 | 0.884615385 | -2.643 | 2.50E-10    | 0.96 |
| UCP1        | 7350      | -2.2845 | 1.63E-09 | 0.9310345 | -2.346  | 2.94E-26 | 0.971153846 | -2.112 | 1.94E-07    | 0.88 |
| PROKR1      | 10887     | -2.4479 | 3.84E-09 | 0.9310345 | -2.3603 | 7.48E-19 | 0.932692308 | -2.691 | 5.04E-10    | 0.96 |
| PHGR1       | 644844    | -2.5457 | 4.30E-09 | 0.9310345 | -2.623  | 1.31E-25 | 0.942307692 | -2.23  | 2.32E-06    | 0.84 |
| ABCD2       | 225       | -2.704  | 4.92E-09 | 0.9310345 | -3.4308 | 2.50E-31 | 0.980769231 | -3.766 | 6.19E-13    | 1    |
| MMD         | 23531     | -2.0282 | 2.13E-08 | 0.9310345 | -2.1961 | 2.24E-25 | 0.951923077 | -2.252 | 9.53E-09    | 0.96 |
| LOC10012897 | 100128977 | -2.1185 | 2.77E-08 | 0.9310345 | -2.2876 | 2.17E-24 | 0.913461538 | NA     | NA          | NA   |
| MYL7        | 58498     | -2.9862 | 1.10E-07 | 0.9310345 | -2.9929 | 1.08E-18 | 0.865384615 | -2.991 | 4.20E-07    | 0.88 |
| IGFBP1      | 3484      | -2.8849 | 1.24E-07 | 0.9310345 | -2.8063 | 6.69E-19 | 0.942307692 | -2.905 | 4.15E-07    | 1    |
| NXNL2       | 158046    | -2.1683 | 3.66E-07 | 0.9310345 | -2.5248 | 1.78E-20 | 0.884615385 | -2.385 | 4.45E-07    | 0.84 |
| PIGR        | 5284      | -4.054  | 1.34E-06 | 0.9310345 | -4.8853 | 2.40E-17 | 0.865384615 | -4.748 | 3.50E-07    | 0.88 |
| MYOM2       | 9172      | -2.0304 | 2.73E-06 | 0.9310345 | -2.6632 | 5.61E-20 | 0.980769231 | -2.002 | 9.91E-06    | 0.92 |
| SYNPO2L     | 79933     | -2.0446 | 1.06E-05 | 0.9310345 | -2.2678 | 1.22E-17 | 0.980769231 | NA     | NA          | NA   |
| PRG4        | 10216     | -2.8412 | 2.86E-05 | 0.9310345 | -3.0952 | 3.89E-12 | 0.913461538 | -2.461 | 0.000921499 | 0.84 |
| RSPO1       | 284654    | -2.1278 | 9.73E-05 | 0.9310345 | -2.6155 | 5.12E-14 | 0.894230769 | -2.611 | 8.28E-06    | 0.84 |
| HOXA5       | 3202      | -3.4396 | 5.01E-41 | 0.8965517 | -3.168  | 6.59E-39 | 0.711538462 | -2.639 | 2.82E-28    | 0.72 |

|           |        |         |          |           |         |          |             |        |          |      |
|-----------|--------|---------|----------|-----------|---------|----------|-------------|--------|----------|------|
| KL        | 9365   | -3.34   | 3.34E-40 | 0.8965517 | -3.9768 | 2.17E-69 | 0.932692308 | -3.197 | 5.04E-28 | 0.84 |
| ACOX2     | 8309   | -3.1685 | 1.82E-36 | 0.8965517 | -3.5857 | 3.51E-50 | 0.826923077 | -2.333 | 4.22E-20 | 0.64 |
| TPO       | 7173   | -4.1742 | 8.52E-34 | 0.8965517 | -4.6037 | 6.98E-58 | 0.913461538 | -3.711 | 3.31E-26 | 0.88 |
| ABLIM3    | 22885  | -3.5594 | 2.31E-32 | 0.8965517 | -4.1031 | 1.65E-61 | 0.913461538 | -3.355 | 8.54E-29 | 0.8  |
| SEMA6D    | 80031  | -2.9546 | 2.15E-31 | 0.8965517 | -3.675  | 3.63E-57 | 0.903846154 | -3.007 | 1.46E-26 | 0.76 |
| ADH1C     | 126    | -5.2958 | 5.93E-30 | 0.8965517 | -6.4078 | 1.79E-62 | 0.951923077 | -4.607 | 3.84E-25 | 0.92 |
| LRRTM2    | 26045  | -3.2365 | 2.18E-29 | 0.8965517 | -3.7237 | 2.42E-60 | 0.923076923 | -3.638 | 1.09E-31 | 0.88 |
| MESTIT1   | 317751 | -4.094  | 2.80E-29 | 0.8965517 | -3.9147 | 7.83E-50 | 0.903846154 | -3.869 | 4.74E-25 | 0.92 |
| CLDN5     | 7122   | -3.3805 | 3.39E-29 | 0.8965517 | -3.7396 | 1.12E-52 | 0.913461538 | -2.495 | 1.78E-15 | 0.72 |
| GPR81     | 27198  | -3.8418 | 1.08E-28 | 0.8965517 | -3.8722 | 2.38E-45 | 0.865384615 | -3.39  | 6.58E-19 | 0.72 |
| ABCA6     | 23460  | -3.3916 | 1.60E-27 | 0.8965517 | -4.3152 | 2.24E-57 | 0.932692308 | -3.557 | 1.80E-25 | 0.88 |
| LOC284276 | 284276 | -3.1369 | 1.74E-27 | 0.8965517 | -3.2904 | 2.22E-48 | 0.855769231 | -2.968 | 4.03E-20 | 0.8  |
| F10       | 2159   | -3.2885 | 4.34E-26 | 0.8965517 | -3.8512 | 1.17E-52 | 0.942307692 | -3.031 | 1.57E-19 | 0.72 |
| CXCL2     | 2920   | -3.6437 | 4.01E-25 | 0.8965517 | -3.4598 | 9.85E-44 | 0.875       | -2.977 | 1.76E-16 | 0.68 |
| LOC145820 | 145820 | -2.7837 | 1.08E-24 | 0.8965517 | -3.1612 | 8.89E-47 | 0.875       | -2.274 | 4.23E-15 | 0.64 |
| SCUBE2    | 57758  | -3.9489 | 1.91E-24 | 0.8965517 | -4.9033 | 1.61E-54 | 0.913461538 | -3.731 | 6.41E-20 | 0.84 |
| PHYHIP    | 9796   | -3.1634 | 3.04E-24 | 0.8965517 | -3.4695 | 2.99E-52 | 0.865384615 | -2.969 | 2.24E-24 | 0.76 |
| HPSE2     | 60495  | -4.0462 | 4.60E-24 | 0.8965517 | -4.4961 | 2.00E-48 | 0.894230769 | -4.083 | 1.09E-21 | 0.88 |
| MASP1     | 5648   | -4.1682 | 1.23E-23 | 0.8965517 | -4.28   | 5.07E-44 | 0.875       | -4.641 | 1.51E-27 | 0.92 |
| KCNJ16    | 3773   | -4.7358 | 2.86E-23 | 0.8965517 | -4.2863 | 7.02E-31 | 0.846153846 | -4.399 | 2.87E-18 | 0.84 |
| STAB2     | 55576  | -4.3844 | 9.37E-23 | 0.8965517 | -4.9247 | 1.69E-52 | 0.971153846 | -4.344 | 1.82E-19 | 0.92 |
| LUZP2     | 338645 | -4.2288 | 8.47E-22 | 0.8965517 | -4.5974 | 5.14E-47 | 0.942307692 | -3.972 | 6.82E-18 | 0.8  |
| SNCG      | 6623   | -3.4462 | 1.23E-21 | 0.8965517 | -3.6642 | 7.28E-34 | 0.855769231 | -2.542 | 7.42E-11 | 0.64 |
| KLF4      | 9314   | -2.788  | 4.29E-21 | 0.8965517 | -3.0859 | 4.93E-48 | 0.942307692 | -2.738 | 1.12E-16 | 0.8  |
| EBF2      | 64641  | -3.3566 | 6.14E-21 | 0.8965517 | -3.7934 | 8.21E-43 | 0.894230769 | -2.995 | 1.99E-14 | 0.76 |
| COL6A6    | 131873 | -3.5036 | 8.36E-21 | 0.8965517 | -4.7493 | 4.55E-51 | 0.961538462 | -4.251 | 1.56E-21 | 0.92 |
| GCOM1     | 145781 | -3.1689 | 2.20E-20 | 0.8965517 | -3.4298 | 2.81E-47 | 0.971153846 | -3.296 | 1.13E-19 | 0.88 |
| ADAMTS18  | 170692 | -3.4438 | 3.01E-20 | 0.8965517 | -3.5338 | 5.29E-32 | 0.846153846 | -3.171 | 2.96E-13 | 0.76 |
| COL4A6    | 1288   | -3.8657 | 9.09E-20 | 0.8965517 | -4.3974 | 1.59E-41 | 0.932692308 | -3.836 | 2.65E-16 | 0.72 |

|           |        |         |          |           |         |          |             |        |          |      |
|-----------|--------|---------|----------|-----------|---------|----------|-------------|--------|----------|------|
| MGLL      | 11343  | -2.5866 | 9.85E-20 | 0.8965517 | -3.0717 | 1.19E-51 | 0.932692308 | -2.178 | 2.60E-14 | 0.76 |
| MUSTN1    | 389125 | -2.7237 | 8.79E-19 | 0.8965517 | -2.8556 | 2.90E-41 | 0.942307692 | -2.064 | 1.16E-10 | 0.84 |
| CTSG      | 1511   | -3.6363 | 6.85E-18 | 0.8965517 | -4.0954 | 2.03E-37 | 0.903846154 | -2.93  | 4.58E-11 | 0.68 |
| DMGDH     | 29958  | -3.1431 | 7.39E-18 | 0.8965517 | -3.1865 | 9.45E-36 | 0.865384615 | -2.746 | 1.33E-13 | 0.84 |
| ODF3L1    | 161753 | -2.5799 | 1.70E-17 | 0.8965517 | -2.623  | 3.56E-34 | 0.807692308 | -2.054 | 1.06E-09 | 0.72 |
| ANKRD30A  | 91074  | -5.6108 | 1.74E-17 | 0.8965517 | -7.084  | 2.10E-48 | 0.942307692 | -5.188 | 1.23E-12 | 0.8  |
| MMP28     | 79148  | -2.565  | 1.84E-17 | 0.8965517 | -3.0587 | 4.69E-37 | 0.846153846 | NA     | NA       | NA   |
| CALCR     | 799    | -2.9092 | 2.37E-17 | 0.8965517 | -2.8256 | 2.72E-34 | 0.875       | -2.619 | 1.35E-13 | 0.88 |
| NIPSNAP3B | 55335  | -2.2503 | 8.28E-17 | 0.8965517 | -2.3906 | 1.36E-38 | 0.875       | -2.808 | 8.96E-19 | 0.88 |
| TMEM195   | 392636 | -2.7941 | 4.95E-16 | 0.8965517 | -3.0256 | 1.22E-30 | 0.903846154 | -2.293 | 1.14E-09 | 0.72 |
| SAMD5     | 389432 | -3.2524 | 5.68E-16 | 0.8965517 | -3.4869 | 1.06E-32 | 0.855769231 | -2.815 | 2.30E-10 | 0.84 |
| FLNC      | 2318   | -2.4055 | 7.24E-16 | 0.8965517 | -2.5775 | 9.99E-26 | 0.884615385 | -2.037 | 3.67E-11 | 0.84 |
| GPR109A   | 338442 | -3.012  | 8.44E-16 | 0.8965517 | -3.2836 | 5.11E-38 | 0.903846154 | -2.59  | 4.04E-11 | 0.76 |
| C14orf139 | 79686  | -2.4912 | 1.26E-15 | 0.8965517 | -3.0278 | 9.72E-45 | 0.932692308 | -2.608 | 7.07E-15 | 0.92 |
| ALDH3A1   | 218    | -3.181  | 5.77E-15 | 0.8965517 | -2.4905 | 8.96E-16 | 0.788461538 | -3.081 | 8.61E-13 | 0.96 |
| ADRB1     | 153    | -2.8489 | 6.43E-15 | 0.8965517 | -2.8577 | 1.00E-25 | 0.855769231 | -2.082 | 2.42E-07 | 0.72 |
| RAB3C     | 115827 | -2.7032 | 7.99E-15 | 0.8965517 | -2.8009 | 1.94E-30 | 0.798076923 | -2.292 | 4.53E-09 | 0.68 |
| CYP3A5    | 1577   | -2.3462 | 8.32E-15 | 0.8965517 | -2.4613 | 8.41E-32 | 0.884615385 | NA     | NA       | NA   |
| BHMT2     | 23743  | -3.17   | 8.42E-15 | 0.8965517 | -3.3969 | 2.84E-28 | 0.884615385 | -2.787 | 1.98E-10 | 0.76 |
| TP63      | 8626   | -4.3264 | 2.00E-14 | 0.8965517 | -4.1623 | 2.05E-29 | 0.884615385 | -3.202 | 5.72E-08 | 0.72 |
| KY        | 339855 | -3.6032 | 2.01E-14 | 0.8965517 | -4.0461 | 2.97E-31 | 0.875       | -4.32  | 5.57E-16 | 0.92 |
| GPR88     | 54112  | -2.7139 | 2.04E-14 | 0.8965517 | -2.9764 | 9.93E-32 | 0.894230769 | -2.665 | 6.19E-15 | 0.8  |
| PCDH9     | 5101   | -2.7733 | 2.78E-14 | 0.8965517 | -3.2212 | 6.69E-31 | 0.846153846 | -3.761 | 2.09E-20 | 0.96 |
| C1orf64   | 149563 | -5.1848 | 7.67E-14 | 0.8965517 | -5.921  | 1.46E-39 | 0.951923077 | -4.143 | 2.62E-08 | 0.84 |
| RHOXF1    | 158800 | -2.6303 | 8.35E-14 | 0.8965517 | -2.7272 | 6.63E-32 | 0.923076923 | -2.907 | 7.50E-14 | 0.88 |
| TMEM37    | 140738 | -2.8341 | 9.58E-14 | 0.8965517 | -2.9323 | 2.20E-35 | 0.913461538 | -2.499 | 2.40E-10 | 0.84 |
| RNASE7    | 84659  | -3.4895 | 9.58E-14 | 0.8965517 | -3.2231 | 1.47E-24 | 0.875       | -2.602 | 2.69E-07 | 0.68 |
| XPNPEP2   | 7512   | -2.8504 | 1.27E-13 | 0.8965517 | -3.0901 | 1.59E-29 | 0.875       | -2.647 | 7.13E-10 | 0.84 |
| NEK10     | 152110 | -4.3914 | 2.38E-13 | 0.8965517 | -4.7939 | 5.67E-36 | 0.951923077 | -4.146 | 1.50E-10 | 0.88 |

|              |           |         |             |           |         |          |             |        |             |      |
|--------------|-----------|---------|-------------|-----------|---------|----------|-------------|--------|-------------|------|
| ANKRD30B     | 374860    | -3.6571 | 3.14E-13    | 0.8965517 | -4.1573 | 2.45E-36 | 0.923076923 | -3.271 | 1.05E-09    | 0.84 |
| CORO6        | 84940     | -2.0412 | 1.08E-12    | 0.8965517 | NA      | NA       | NA          | NA     | NA          | NA   |
| ANO3         | 63982     | -3.065  | 1.48E-12    | 0.8965517 | -3.5937 | 1.22E-30 | 0.865384615 | -2.803 | 8.26E-09    | 0.68 |
| MAS1L        | 116511    | -2.0296 | 1.83E-12    | 0.8965517 | -2.0683 | 5.08E-32 | 0.903846154 | NA     | NA          | NA   |
| HCN1         | 348980    | -2.4973 | 3.61E-12    | 0.8965517 | -2.3275 | 4.95E-22 | 0.875       | -2.317 | 4.54E-10    | 0.84 |
| SLC5A7       | 60482     | -2.0016 | 2.11E-10    | 0.8965517 | -2.1263 | 4.14E-27 | 0.903846154 | NA     | NA          | NA   |
| SLC26A3      | 1811      | -4.6639 | 3.46E-10    | 0.8965517 | -5.3518 | 6.68E-33 | 0.961538462 | -4.521 | 7.16E-09    | 0.92 |
| CBLN4        | 140689    | -2.598  | 5.51E-10    | 0.8965517 | -3.4663 | 5.47E-30 | 0.884615385 | -2.518 | 1.52E-07    | 0.8  |
| AGXT         | 189       | -2.046  | 1.18E-09    | 0.8965517 | -2.2112 | 8.75E-27 | 0.894230769 | NA     | NA          | NA   |
| CYP4F22      | 126410    | -3.5767 | 1.61E-09    | 0.8965517 | -4.5348 | 8.35E-29 | 0.923076923 | -3.62  | 6.84E-08    | 0.8  |
| CYP2B7P1     | 1556      | -3.0833 | 1.65E-09    | 0.8965517 | -3.8489 | 5.84E-29 | 0.923076923 | -2.334 | 8.64E-06    | 0.84 |
| EYA4         | 2070      | -2.4172 | 1.80E-09    | 0.8965517 | NA      | NA       | NA          | -2.52  | 7.77E-09    | 0.84 |
| EDN3         | 1908      | -4.0448 | 2.00E-09    | 0.8965517 | -3.5694 | 7.19E-16 | 0.788461538 | -3.545 | 7.77E-07    | 0.8  |
| DKK4         | 27121     | -2.0075 | 2.15E-09    | 0.8965517 | NA      | NA       | NA          | NA     | NA          | NA   |
| LOC100130148 | 100130148 | -2.0824 | 3.94E-09    | 0.8965517 | -2.0578 | 5.80E-22 | 0.884615385 | NA     | NA          | NA   |
| SPOCK3       | 50859     | -2.6578 | 1.16E-08    | 0.8965517 | -2.8826 | 2.86E-22 | 0.903846154 | -2.8   | 1.12E-08    | 0.88 |
| C6           | 729       | -3.4545 | 1.35E-08    | 0.8965517 | -4.5229 | 3.48E-27 | 0.923076923 | -3.41  | 4.56E-08    | 0.88 |
| PROL1        | 58503     | -4.7165 | 1.40E-08    | 0.8965517 | -5.3433 | 4.85E-24 | 0.971153846 | -3.834 | 2.72E-05    | 0.8  |
| OVCH2        | 341277    | -2.7397 | 2.29E-08    | 0.8965517 | -3.3292 | 5.17E-29 | 0.942307692 | -2.682 | 4.52E-07    | 0.88 |
| SYCE1        | 93426     | -2.715  | 4.98E-08    | 0.8965517 | -3.3306 | 8.41E-23 | 0.894230769 | -3.012 | 2.15E-08    | 0.88 |
| STC2         | 8614      | -2.5824 | 6.92E-08    | 0.8965517 | -2.1815 | 3.43E-16 | 0.855769231 | -2.514 | 9.42E-07    | 0.84 |
| PROK1        | 84432     | -2.2097 | 1.00E-06    | 0.8965517 | -2.2294 | 4.35E-15 | 0.942307692 | NA     | NA          | NA   |
| LOC728606    | 728606    | -2.6006 | 5.03E-06    | 0.8965517 | -3.0353 | 3.41E-18 | 0.865384615 | -2.245 | 0.000267089 | 0.76 |
| HPD          | 3242      | -2.5449 | 6.96E-06    | 0.8965517 | -3.1238 | 1.81E-19 | 0.942307692 | -2.806 | 7.80E-07    | 0.96 |
| KLK3         | 354       | -2.4867 | 6.29E-05    | 0.8965517 | -3.0642 | 1.38E-16 | 0.961538462 | -3.166 | 1.48E-06    | 0.96 |
| UGT2B28      | 54490     | -2.922  | 0.000913596 | 0.8965517 | -3.5926 | 7.37E-13 | 0.932692308 | NA     | NA          | NA   |
| MAMDC2       | 256691    | -4.3314 | 2.05E-42    | 0.862069  | -4.8554 | 1.54E-54 | 0.903846154 | -3.878 | 5.88E-31    | 0.8  |
| HOXA7        | 3204      | -3.3616 | 1.76E-40    | 0.862069  | -2.9207 | 3.89E-31 | 0.644230769 | -2.506 | 2.22E-27    | 0.68 |
| TSLP         | 85480     | -3.8699 | 4.42E-37    | 0.862069  | -3.5847 | 3.17E-49 | 0.836538462 | -3.742 | 4.86E-28    | 0.8  |

|          |        |         |          |          |         |          |             |        |          |      |
|----------|--------|---------|----------|----------|---------|----------|-------------|--------|----------|------|
| C1QTNF9  | 338872 | -3.8765 | 4.10E-34 | 0.862069 | -4.2664 | 2.49E-69 | 0.951923077 | -3.559 | 1.43E-28 | 0.8  |
| HLF      | 3131   | -3.4405 | 4.39E-34 | 0.862069 | -3.9372 | 3.94E-58 | 0.923076923 | -3.816 | 1.89E-32 | 0.96 |
| MAPT     | 4137   | -3.883  | 2.10E-33 | 0.862069 | -3.4198 | 3.99E-41 | 0.769230769 | -2.854 | 1.66E-19 | 0.56 |
| C9orf125 | 84302  | -2.7032 | 6.16E-33 | 0.862069 | -2.6381 | 2.45E-41 | 0.75        | -2.527 | 1.93E-24 | 0.72 |
| ADCY5    | 111    | -4.4087 | 1.03E-32 | 0.862069 | -5.2629 | 3.68E-58 | 0.884615385 | -4.401 | 1.44E-33 | 0.8  |
| NKAPL    | 222698 | -3.0068 | 1.20E-32 | 0.862069 | -3.2513 | 6.95E-68 | 0.923076923 | -2.858 | 2.67E-31 | 0.88 |
| CHL1     | 10752  | -4.1689 | 3.45E-30 | 0.862069 | -4.7583 | 8.38E-52 | 0.913461538 | -4.469 | 8.33E-28 | 0.88 |
| BAI3     | 577    | -3.0001 | 1.40E-28 | 0.862069 | -3.0026 | 9.64E-40 | 0.855769231 | -2.914 | 5.83E-26 | 0.8  |
| ADAMTS15 | 170689 | -4.0493 | 1.56E-27 | 0.862069 | -4.1983 | 1.38E-47 | 0.903846154 | -3.642 | 4.53E-20 | 0.68 |
| CCDC158  | 339965 | -3.4611 | 8.44E-27 | 0.862069 | -3.6215 | 1.63E-46 | 0.846153846 | -4.014 | 4.78E-29 | 0.92 |
| DNALI1   | 7802   | -3.4038 | 2.17E-26 | 0.862069 | -3.7967 | 2.61E-42 | 0.817307692 | -3.1   | 8.52E-19 | 0.76 |
| CCDC85A  | 114800 | -2.9913 | 1.85E-25 | 0.862069 | -3.3961 | 2.52E-47 | 0.875       | -3.065 | 6.84E-22 | 0.84 |
| BMPER    | 168667 | -3.6631 | 2.13E-25 | 0.862069 | -3.9253 | 7.47E-43 | 0.855769231 | -3.514 | 2.78E-19 | 0.76 |
| IGF1     | 3479   | -3.2392 | 2.90E-25 | 0.862069 | -3.8928 | 9.22E-44 | 0.846153846 | -3.339 | 2.96E-20 | 0.76 |
| MOCS1    | 4337   | -2.4195 | 3.09E-25 | 0.862069 | -2.4884 | 2.76E-50 | 0.807692308 | -2.294 | 7.28E-18 | 0.72 |
| DARC     | 2532   | -3.6639 | 5.38E-24 | 0.862069 | -4.9068 | 9.20E-42 | 0.855769231 | -3.404 | 2.04E-17 | 0.8  |
| CLIC5    | 53405  | -2.5256 | 7.76E-24 | 0.862069 | -2.7453 | 2.11E-47 | 0.846153846 | -2.482 | 8.84E-19 | 0.68 |
| ERBB4    | 2066   | -4.1837 | 3.31E-23 | 0.862069 | -5.5366 | 2.43E-46 | 0.903846154 | -4.543 | 2.86E-19 | 0.8  |
| HSPB8    | 26353  | -2.7323 | 6.44E-23 | 0.862069 | -2.9232 | 1.95E-31 | 0.788461538 | -2.644 | 2.55E-18 | 0.76 |
| MFAP4    | 4239   | -3.1589 | 1.63E-22 | 0.862069 | -4.2109 | 1.80E-49 | 0.932692308 | -3.416 | 8.90E-20 | 0.8  |
| PDE11A   | 50940  | -3.5202 | 2.13E-22 | 0.862069 | -4.5855 | 4.16E-57 | 0.932692308 | -4.095 | 2.29E-25 | 0.84 |
| RELN     | 5649   | -3.8796 | 1.38E-20 | 0.862069 | -4.8599 | 9.90E-41 | 0.903846154 | -4.198 | 9.18E-23 | 0.84 |
| ABCC6    | 368    | -3.3009 | 1.59E-20 | 0.862069 | -3.5455 | 3.68E-40 | 0.884615385 | -2.71  | 8.93E-13 | 0.68 |
| PTGER3   | 5733   | -3.2854 | 1.65E-20 | 0.862069 | -4.3915 | 3.01E-55 | 0.971153846 | -3.659 | 1.51E-20 | 0.88 |
| PREX2    | 80243  | -3.7674 | 4.57E-20 | 0.862069 | -4.3658 | 2.52E-41 | 0.923076923 | -3.819 | 9.08E-18 | 0.88 |
| PTH1R    | 5745   | -2.8882 | 6.90E-19 | 0.862069 | -3.4391 | 4.39E-40 | 0.884615385 | -2.791 | 1.52E-15 | 0.84 |
| CYP4B1   | 1580   | -4.238  | 1.58E-18 | 0.862069 | -5.2432 | 1.70E-46 | 0.942307692 | -3.313 | 2.06E-12 | 0.84 |
| NMNAT2   | 23057  | -2.636  | 1.54E-16 | 0.862069 | -2.6709 | 2.51E-27 | 0.740384615 | -2.601 | 3.71E-16 | 0.76 |
| ACADL    | 33     | -3.8217 | 4.84E-16 | 0.862069 | -4.1155 | 9.49E-30 | 0.855769231 | -4.008 | 3.28E-15 | 0.8  |

|          |        |         |          |          |         |          |             |        |          |      |
|----------|--------|---------|----------|----------|---------|----------|-------------|--------|----------|------|
| GPR133   | 283383 | -2.8976 | 7.39E-16 | 0.862069 | -3.2739 | 5.82E-33 | 0.846153846 | -3.132 | 6.29E-14 | 0.76 |
| C8orf34  | 116328 | -3.0185 | 8.59E-16 | 0.862069 | -3.3891 | 6.67E-38 | 0.903846154 | -3.169 | 3.52E-14 | 0.84 |
| ABCC9    | 10060  | -2.4948 | 1.79E-14 | 0.862069 | -2.9266 | 7.20E-34 | 0.846153846 | -2.006 | 6.06E-09 | 0.72 |
| GRIK5    | 2901   | -2.6412 | 2.56E-14 | 0.862069 | -2.2327 | 3.14E-20 | 0.730769231 | -2.1   | 2.44E-08 | 0.6  |
| ART4     | 420    | -2.5876 | 5.80E-14 | 0.862069 | -3.0834 | 1.66E-32 | 0.875       | -2.452 | 1.12E-11 | 0.68 |
| SHISA3   | 152573 | -2.4988 | 6.46E-14 | 0.862069 | -2.1276 | 2.04E-17 | 0.711538462 | NA     | NA       | NA   |
| KLHL4    | 56062  | -2.5625 | 7.69E-14 | 0.862069 | -2.9126 | 1.06E-30 | 0.836538462 | -2.218 | 2.10E-09 | 0.76 |
| ALX4     | 60529  | -3.2981 | 9.56E-14 | 0.862069 | -3.1177 | 2.27E-24 | 0.826923077 | -3.101 | 2.88E-11 | 0.84 |
| PSD2     | 84249  | -2.8495 | 1.10E-13 | 0.862069 | -2.5592 | 4.28E-22 | 0.826923077 | -2.101 | 2.80E-07 | 0.72 |
| ERVFRDE1 | 405754 | -2.3726 | 1.42E-13 | 0.862069 | -2.6173 | 5.72E-34 | 0.913461538 | -2.212 | 1.97E-10 | 0.8  |
| TTC36    | 143941 | -3.3269 | 1.59E-13 | 0.862069 | -3.872  | 6.49E-34 | 0.923076923 | -2.537 | 1.40E-07 | 0.72 |
| ODZ2     | 57451  | -3.4847 | 1.70E-13 | 0.862069 | -3.7565 | 3.35E-29 | 0.855769231 | -3.537 | 9.46E-11 | 0.8  |
| RNF186   | 54546  | -3.3137 | 3.08E-12 | 0.862069 | -3.6044 | 2.03E-29 | 0.903846154 | -3.696 | 2.54E-13 | 0.84 |
| TCEAL5   | 340543 | -2.2722 | 3.57E-12 | 0.862069 | -2.4696 | 1.77E-27 | 0.836538462 | -2.1   | 3.80E-09 | 0.64 |
| CXCR7    | 57007  | -2.2333 | 4.61E-12 | 0.862069 | -2.3666 | 6.25E-31 | 0.855769231 | NA     | NA       | NA   |
| GRIK3    | 2899   | -3.5213 | 5.90E-12 | 0.862069 | -4.1301 | 3.42E-28 | 0.875       | -2.819 | 1.24E-07 | 0.72 |
| LMX1A    | 4009   | -2.7864 | 7.75E-12 | 0.862069 | -2.8347 | 1.25E-23 | 0.855769231 | -2.623 | 2.98E-09 | 0.88 |
| SLC26A5  | 375611 | -2.3409 | 8.45E-12 | 0.862069 | -2.3611 | 2.91E-26 | 0.884615385 | -2.28  | 2.89E-10 | 0.84 |
| SAA1     | 6288   | -2.9844 | 9.56E-12 | 0.862069 | -3.4934 | 1.45E-26 | 0.846153846 | -3.593 | 1.34E-13 | 0.92 |
| SLC4A4   | 8671   | -2.7126 | 1.42E-11 | 0.862069 | -3.358  | 3.42E-35 | 0.961538462 | -3.081 | 2.34E-11 | 0.84 |
| PCOLCE2  | 26577  | -3.5888 | 5.98E-11 | 0.862069 | -3.5328 | 4.99E-24 | 0.913461538 | -3.5   | 2.61E-10 | 0.96 |
| DCT      | 1638   | -2.4892 | 1.04E-10 | 0.862069 | -3.1485 | 2.29E-38 | 0.951923077 | -2.249 | 7.64E-08 | 0.8  |
| FAM3B    | 54097  | -3.1183 | 1.21E-10 | 0.862069 | -2.652  | 8.09E-15 | 0.730769231 | -2.296 | 2.99E-05 | 0.64 |
| GPX2     | 2877   | -3.501  | 1.48E-10 | 0.862069 | -3.5752 | 4.02E-20 | 0.865384615 | -2.702 | 4.37E-06 | 0.72 |
| CDH20    | 28316  | -2.7132 | 1.54E-10 | 0.862069 | -3.0989 | 3.50E-29 | 0.942307692 | -3.272 | 7.73E-13 | 0.92 |
| TAC1     | 6863   | -3.1934 | 1.60E-10 | 0.862069 | -3.7767 | 1.98E-30 | 0.932692308 | -3.603 | 2.97E-11 | 0.88 |
| GPBAR1   | 151306 | -2.262  | 5.95E-10 | 0.862069 | -2.2564 | 8.72E-24 | 0.826923077 | NA     | NA       | NA   |
| FSIP1    | 161835 | -2.3483 | 6.44E-10 | 0.862069 | -2.6516 | 7.72E-25 | 0.884615385 | -2.16  | 1.09E-07 | 0.76 |
| SCGB1D2  | 10647  | -4.9694 | 6.53E-10 | 0.862069 | -6.8934 | 2.21E-37 | 0.980769231 | -4.56  | 3.85E-08 | 0.92 |

|           |        |         |             |           |         |          |             |        |             |      |
|-----------|--------|---------|-------------|-----------|---------|----------|-------------|--------|-------------|------|
| CAPZA3    | 93661  | -2.3942 | 7.25E-10    | 0.862069  | -2.4129 | 4.29E-21 | 0.769230769 | NA     | NA          | NA   |
| KIAA1239  | 57495  | -3.18   | 1.07E-09    | 0.862069  | -3.4296 | 5.67E-24 | 0.932692308 | -3.099 | 1.70E-08    | 0.92 |
| SERPINA11 | 256394 | -3.7104 | 1.44E-09    | 0.862069  | -4.0931 | 2.91E-25 | 0.913461538 | -3.478 | 2.75E-07    | 0.84 |
| DCDC2     | 51473  | -3.4676 | 2.17E-09    | 0.862069  | -3.3758 | 5.56E-19 | 0.846153846 | -3.236 | 5.07E-07    | 0.8  |
| LILRB5    | 10990  | -2.4157 | 4.58E-09    | 0.862069  | -2.0465 | 3.06E-15 | 0.769230769 | NA     | NA          | NA   |
| SCGB2A2   | 4250   | -4.968  | 2.84E-08    | 0.862069  | -7.4619 | 6.04E-35 | 0.980769231 | -4.42  | 2.26E-06    | 0.84 |
| FER1L5    | 90342  | -2.4135 | 5.96E-08    | 0.862069  | -2.7335 | 1.46E-23 | 0.923076923 | -2.813 | 3.81E-09    | 0.88 |
| PGLYRP2   | 114770 | -2.8253 | 6.44E-08    | 0.862069  | -3.1369 | 2.16E-21 | 0.884615385 | -2.223 | 7.23E-05    | 0.8  |
| PTN       | 5764   | -2.784  | 1.08E-07    | 0.862069  | -3.5059 | 1.35E-22 | 0.817307692 | -3.094 | 9.81E-08    | 0.72 |
| GRIA2     | 2891   | -2.6822 | 1.66E-07    | 0.862069  | -2.187  | 8.40E-10 | 0.711538462 | -2.723 | 7.05E-08    | 0.68 |
| CALML3    | 810    | -3.3287 | 1.77E-07    | 0.862069  | -3.0965 | 7.83E-12 | 0.807692308 | -2.189 | 0.002295366 | 0.64 |
| UGT2B15   | 7366   | -3.3793 | 2.22E-07    | 0.862069  | -4.1069 | 1.32E-24 | 0.961538462 | -3.089 | 1.05E-05    | 0.92 |
| SYTL5     | 94122  | -2.9728 | 7.35E-07    | 0.862069  | -3.9292 | 4.66E-24 | 0.884615385 | NA     | NA          | NA   |
| NLRP5     | 126206 | -2.5996 | 1.19E-06    | 0.862069  | -3.3264 | 2.70E-27 | 0.942307692 | -2.869 | 6.37E-07    | 0.88 |
| UGT2B11   | 10720  | -4.2703 | 2.91E-06    | 0.862069  | -5.7191 | 1.12E-25 | 0.961538462 | -3.681 | 0.000158773 | 0.84 |
| ABCC11    | 85320  | -2.7116 | 0.000174313 | 0.862069  | -4.2711 | 2.83E-18 | 0.913461538 | NA     | NA          | NA   |
| MUCL1     | 118430 | -3.947  | 0.000189031 | 0.862069  | -6.1504 | 8.85E-20 | 0.913461538 | -3.158 | 0.005477845 | 0.72 |
| LDB2      | 9079   | -2.6045 | 4.28E-38    | 0.8275862 | -2.9861 | 9.90E-65 | 0.826923077 | -2.282 | 9.88E-23    | 0.6  |
| LHFP      | 10186  | -2.4765 | 2.83E-37    | 0.8275862 | -2.8927 | 2.55E-63 | 0.855769231 | -2.174 | 1.64E-24    | 0.72 |
| PEAR1     | 375033 | -2.7657 | 8.64E-37    | 0.8275862 | -3.1147 | 1.51E-55 | 0.826923077 | -2.508 | 4.06E-26    | 0.72 |
| GPRASP1   | 9737   | -2.7057 | 5.21E-36    | 0.8275862 | -3.0169 | 4.09E-56 | 0.826923077 | -2.691 | 7.32E-29    | 0.76 |
| GIPC2     | 54810  | -3.4347 | 7.93E-36    | 0.8275862 | -3.6319 | 4.93E-52 | 0.836538462 | -3.371 | 3.87E-32    | 0.84 |
| NTRK2     | 4915   | -4.2586 | 1.90E-34    | 0.8275862 | -4.5558 | 6.61E-57 | 0.884615385 | -4.747 | 4.09E-36    | 0.88 |
| RAPGEF3   | 10411  | -2.9132 | 4.10E-34    | 0.8275862 | -3.3631 | 9.29E-69 | 0.875       | -2.323 | 6.23E-23    | 0.6  |
| TCEAL7    | 56849  | -3.0276 | 5.07E-34    | 0.8275862 | -3.453  | 1.27E-64 | 0.951923077 | -3.04  | 1.60E-27    | 0.8  |
| TSPAN7    | 7102   | -2.9656 | 1.45E-33    | 0.8275862 | -3.3865 | 5.34E-51 | 0.826923077 | -2.912 | 8.24E-25    | 0.8  |
| LOC134466 | 134466 | -2.9274 | 6.30E-32    | 0.8275862 | -3.3228 | 2.05E-50 | 0.875       | -3.194 | 6.68E-27    | 0.84 |
| MYRIP     | 25924  | -3.6667 | 1.49E-31    | 0.8275862 | -4.3575 | 1.18E-48 | 0.855769231 | -4.235 | 1.30E-28    | 0.76 |
| CD34      | 947    | -2.4209 | 4.79E-30    | 0.8275862 | -2.6352 | 4.91E-57 | 0.798076923 | -2.05  | 1.24E-19    | 0.52 |



|           |           |         |          |           |         |          |             |        |          |      |
|-----------|-----------|---------|----------|-----------|---------|----------|-------------|--------|----------|------|
| RBMS3     | 27303     | -3.1863 | 6.93E-30 | 0.8275862 | -3.2965 | 2.93E-50 | 0.846153846 | -2.888 | 3.66E-25 | 0.8  |
| PCDH19    | 57526     | -3.0251 | 8.47E-30 | 0.8275862 | -3.3784 | 1.26E-46 | 0.865384615 | -3.146 | 1.53E-27 | 0.76 |
| ZBTB16    | 7704      | -5.4404 | 3.43E-29 | 0.8275862 | -6.5004 | 1.61E-64 | 0.942307692 | -5.654 | 2.45E-29 | 0.88 |
| HOXA6     | 3203      | -3.4585 | 5.39E-29 | 0.8275862 | -2.9152 | 2.56E-31 | 0.682692308 | -2.679 | 2.25E-20 | 0.72 |
| LRRC70    | 100130733 | -2.6059 | 9.15E-29 | 0.8275862 | -2.9404 | 5.76E-57 | 0.817307692 | -2.223 | 4.31E-18 | 0.6  |
| ADRB2     | 154       | -2.9763 | 3.17E-27 | 0.8275862 | -3.8742 | 2.51E-52 | 0.875       | -3.327 | 2.16E-26 | 0.76 |
| DUSP1     | 1843      | -2.8907 | 1.95E-26 | 0.8275862 | -2.9735 | 8.27E-49 | 0.836538462 | -2.356 | 1.36E-16 | 0.56 |
| C4orf31   | 79625     | -3.3038 | 6.02E-26 | 0.8275862 | -3.9822 | 1.22E-42 | 0.875       | -4.047 | 3.57E-26 | 0.8  |
| ENPP2     | 5168      | -3.054  | 6.22E-26 | 0.8275862 | -3.1175 | 1.95E-41 | 0.788461538 | -2.38  | 1.30E-18 | 0.68 |
| ALDH1A1   | 216       | -3.0819 | 7.19E-26 | 0.8275862 | -3.3188 | 4.85E-48 | 0.875       | -2.827 | 1.82E-22 | 0.68 |
| DACT2     | 168002    | -3.727  | 7.60E-26 | 0.8275862 | -3.3871 | 6.62E-30 | 0.75        | -3.019 | 1.22E-17 | 0.76 |
| C2orf40   | 84417     | -4.9617 | 7.18E-25 | 0.8275862 | -5.4662 | 1.79E-51 | 0.923076923 | -4.953 | 3.03E-28 | 0.84 |
| FAM149A   | 25854     | -2.6509 | 1.17E-24 | 0.8275862 | -2.4898 | 1.39E-34 | 0.673076923 | -2.583 | 3.79E-19 | 0.64 |
| C1QTNF9B  | 387911    | -2.8256 | 1.40E-24 | 0.8275862 | -3.0782 | 2.50E-44 | 0.865384615 | -3.014 | 2.58E-24 | 0.92 |
| MEOX1     | 4222      | -2.9641 | 6.84E-24 | 0.8275862 | -3.7208 | 2.72E-42 | 0.826923077 | -3.119 | 5.34E-24 | 0.76 |
| LOC285419 | 285419    | -2.3162 | 1.19E-23 | 0.8275862 | -2.4079 | 1.55E-35 | 0.826923077 | NA     | NA       | NA   |
| NLGN1     | 22871     | -3.3519 | 8.24E-23 | 0.8275862 | -3.4755 | 1.61E-36 | 0.817307692 | -3.788 | 2.80E-20 | 0.76 |
| WSCD2     | 9671      | -3.1003 | 4.65E-22 | 0.8275862 | -3.6985 | 3.74E-36 | 0.826923077 | -3.757 | 6.78E-28 | 0.88 |
| GAS2L2    | 246176    | -2.9868 | 4.99E-22 | 0.8275862 | -3.2607 | 3.81E-33 | 0.817307692 | -2.898 | 2.49E-19 | 0.76 |
| CLSTN2    | 64084     | -3.396  | 8.03E-22 | 0.8275862 | -4.0753 | 7.04E-46 | 0.903846154 | -3.324 | 3.62E-19 | 0.84 |
| P2RY12    | 64805     | -3.0164 | 1.34E-21 | 0.8275862 | -4.0259 | 5.64E-50 | 0.875       | -3.532 | 1.57E-22 | 0.88 |
| SLC10A6   | 345274    | -2.8176 | 1.35E-21 | 0.8275862 | -2.7471 | 6.85E-36 | 0.826923077 | NA     | NA       | NA   |
| SLC7A4    | 6545      | -3.5174 | 2.14E-21 | 0.8275862 | -3.5446 | 1.16E-30 | 0.75        | -3.921 | 5.19E-24 | 0.8  |
| PLCXD3    | 345557    | -3.8383 | 6.46E-21 | 0.8275862 | -4.3771 | 8.65E-42 | 0.903846154 | -3.596 | 1.28E-16 | 0.8  |
| AMIGO2    | 347902    | -2.7867 | 1.06E-20 | 0.8275862 | -2.874  | 2.74E-38 | 0.817307692 | -2.286 | 1.05E-11 | 0.64 |
| DPP6      | 1804      | -3.7834 | 1.13E-20 | 0.8275862 | -4.3462 | 1.33E-40 | 0.875       | -4.704 | 6.32E-31 | 0.96 |
| LRFN5     | 145581    | -2.4494 | 1.95E-20 | 0.8275862 | -3.284  | 8.55E-40 | 0.875       | -2.727 | 6.02E-19 | 0.72 |
| AOX1      | 316       | -3.2507 | 4.15E-20 | 0.8275862 | -3.8683 | 2.36E-43 | 0.894230769 | -3.678 | 1.98E-20 | 0.8  |
| MYH7B     | 57644     | -2.2528 | 1.96E-19 | 0.8275862 | -2.2129 | 8.05E-33 | 0.865384615 | -2.22  | 3.53E-16 | 0.8  |

|          |        |         |          |           |         |          |             |        |          |      |
|----------|--------|---------|----------|-----------|---------|----------|-------------|--------|----------|------|
| SLC1A7   | 6512   | -2.7765 | 4.38E-19 | 0.8275862 | -3.0313 | 8.98E-37 | 0.817307692 | -2.353 | 9.48E-13 | 0.68 |
| NRXN1    | 9378   | -3.3228 | 7.46E-19 | 0.8275862 | -3.1892 | 5.52E-26 | 0.788461538 | -2.72  | 2.10E-11 | 0.6  |
| GFAP     | 2670   | -3.4433 | 1.20E-17 | 0.8275862 | -4.2249 | 5.36E-44 | 0.932692308 | -4.311 | 1.02E-20 | 0.84 |
| TCF21    | 6943   | -2.331  | 1.41E-16 | 0.8275862 | -2.4288 | 3.69E-32 | 0.865384615 | NA     | NA       | NA   |
| TMEM100  | 55273  | -3.3644 | 1.65E-16 | 0.8275862 | -3.6182 | 1.85E-28 | 0.788461538 | -2.881 | 9.63E-14 | 0.8  |
| EMX2OS   | 196047 | -2.5471 | 3.61E-16 | 0.8275862 | -2.9542 | 1.02E-32 | 0.817307692 | -2.866 | 7.24E-15 | 0.84 |
| TPPP3    | 51673  | -2.2678 | 4.51E-16 | 0.8275862 | -2.29   | 1.48E-26 | 0.788461538 | NA     | NA       | NA   |
| AKR1C1   | 1645   | -3.4006 | 9.49E-16 | 0.8275862 | -3.9124 | 5.13E-35 | 0.913461538 | -3.066 | 1.60E-11 | 0.76 |
| LRP1B    | 53353  | -3.1494 | 1.11E-15 | 0.8275862 | -3.7738 | 1.21E-34 | 0.826923077 | -3.531 | 1.89E-17 | 0.76 |
| DMRT2    | 10655  | -2.9272 | 1.26E-15 | 0.8275862 | -2.8507 | 3.01E-24 | 0.759615385 | -3.275 | 3.45E-16 | 0.88 |
| C10orf82 | 143379 | -3.1106 | 3.03E-15 | 0.8275862 | -3.3164 | 1.95E-29 | 0.875       | -3.295 | 2.99E-15 | 0.88 |
| ASTN1    | 460    | -2.928  | 4.03E-15 | 0.8275862 | -2.9455 | 4.01E-22 | 0.75        | -3.014 | 1.81E-11 | 0.72 |
| SLC14A1  | 6563   | -2.4045 | 5.52E-15 | 0.8275862 | -2.4747 | 1.19E-25 | 0.730769231 | -2.411 | 4.74E-14 | 0.76 |
| PFKFB3   | 5209   | -2.106  | 9.58E-15 | 0.8275862 | -2.0744 | 1.60E-32 | 0.721153846 | -2.28  | 1.46E-14 | 0.76 |
| ZFP36    | 7538   | -2.2761 | 1.28E-14 | 0.8275862 | -2.5906 | 9.11E-38 | 0.855769231 | NA     | NA       | NA   |
| CADM2    | 253559 | -2.8181 | 3.20E-14 | 0.8275862 | -3.4151 | 1.17E-32 | 0.836538462 | -3.435 | 4.93E-18 | 0.8  |
| IGSF1    | 3547   | -3.7167 | 3.93E-14 | 0.8275862 | -3.3776 | 2.11E-21 | 0.846153846 | -4.261 | 1.15E-14 | 0.88 |
| SLC25A18 | 83733  | -2.4163 | 7.53E-14 | 0.8275862 | -2.7827 | 8.55E-35 | 0.884615385 | -2.21  | 3.48E-11 | 0.8  |
| SCUBE1   | 80274  | -2.795  | 3.39E-13 | 0.8275862 | -3.0422 | 7.03E-25 | 0.798076923 | -3.012 | 6.99E-13 | 0.8  |
| CLEC4GP1 | 440508 | -2.6244 | 4.84E-13 | 0.8275862 | -2.7136 | 6.37E-32 | 0.894230769 | -2.482 | 1.85E-10 | 0.84 |
| AOC2     | 314    | -2.2761 | 6.10E-13 | 0.8275862 | -2.2105 | 7.60E-26 | 0.807692308 | -2.509 | 1.91E-13 | 0.84 |
| HSPA12A  | 259217 | -2.2852 | 7.98E-13 | 0.8275862 | -2.5463 | 5.32E-32 | 0.826923077 | -2.516 | 1.18E-13 | 0.8  |
| CLDND2   | 125875 | -2.2981 | 1.79E-12 | 0.8275862 | -2.3335 | 8.78E-28 | 0.759615385 | -2.063 | 1.05E-10 | 0.76 |
| CDH22    | 64405  | -2.4106 | 2.75E-12 | 0.8275862 | -2.1025 | 5.07E-15 | 0.769230769 | -2.218 | 2.18E-09 | 0.68 |
| SPINK5   | 11005  | -3.0015 | 2.95E-12 | 0.8275862 | -2.1293 | 5.43E-10 | 0.701923077 | NA     | NA       | NA   |
| CHAD     | 1101   | -3.3189 | 3.98E-12 | 0.8275862 | -3.6644 | 1.43E-31 | 0.903846154 | -3.364 | 4.29E-10 | 0.76 |
| KLHDC7A  | 127707 | -3.5697 | 6.19E-12 | 0.8275862 | -4.7746 | 3.01E-33 | 0.884615385 | -3.339 | 7.47E-10 | 0.76 |
| SLCO1C1  | 53919  | -2.1027 | 1.15E-11 | 0.8275862 | -2.7053 | 2.02E-34 | 0.875       | NA     | NA       | NA   |
| NROB1    | 190    | -2.2551 | 1.28E-11 | 0.8275862 | NA      | NA       | NA          | NA     | NA       | NA   |

|          |           |         |          |           |         |          |             |        |          |      |
|----------|-----------|---------|----------|-----------|---------|----------|-------------|--------|----------|------|
| PKDCC    | 91461     | -2.0849 | 1.76E-11 | 0.8275862 | NA      | NA       | NA          | NA     | NA       | NA   |
| C1orf173 | 127254    | -3.3195 | 4.61E-11 | 0.8275862 | -3.567  | 3.59E-26 | 0.894230769 | -3.708 | 1.28E-10 | 0.88 |
| CLCA4    | 22802     | -3.6323 | 6.88E-11 | 0.8275862 | -3.6695 | 2.06E-24 | 0.846153846 | -3.344 | 2.52E-08 | 0.76 |
| MOSC1    | 64757     | -2.2402 | 8.30E-11 | 0.8275862 | -2.4329 | 7.35E-28 | 0.855769231 | -2.523 | 7.30E-11 | 0.88 |
| SLC16A7  | 9194      | -2.6221 | 2.30E-10 | 0.8275862 | -3.1243 | 3.17E-31 | 0.932692308 | -3.245 | 1.65E-13 | 0.92 |
| MYEOV    | 26579     | -2.8701 | 3.80E-10 | 0.8275862 | -2.2204 | 2.51E-10 | 0.701923077 | -2.643 | 1.72E-07 | 0.8  |
| LYPD6    | 130574    | -2.6927 | 9.04E-10 | 0.8275862 | -2.8591 | 7.44E-23 | 0.807692308 | -2.994 | 4.61E-10 | 0.8  |
| IGDCC3   | 9543      | -3.1297 | 1.76E-09 | 0.8275862 | -3.6164 | 7.68E-29 | 0.932692308 | -2.762 | 1.61E-07 | 0.76 |
| IL1RAPL2 | 26280     | -2.5702 | 1.98E-09 | 0.8275862 | -2.6692 | 1.67E-20 | 0.826923077 | NA     | NA       | NA   |
| MYO16    | 23026     | -2.4077 | 3.34E-09 | 0.8275862 | -2.2064 | 8.82E-16 | 0.75        | -2.889 | 3.54E-11 | 0.88 |
| SYT9     | 143425    | -2.7502 | 3.52E-09 | 0.8275862 | -3.598  | 5.53E-29 | 0.894230769 | -3.444 | 2.80E-12 | 0.84 |
| SAA2     | 6289      | -2.9465 | 3.61E-09 | 0.8275862 | -3.4485 | 6.24E-21 | 0.836538462 | -3.779 | 1.20E-12 | 0.88 |
| KLHL31   | 401265    | -2.2332 | 4.20E-09 | 0.8275862 | -3.0086 | 1.75E-36 | 0.971153846 | -3.086 | 1.07E-12 | 0.92 |
| C13orf36 | 400120    | -2.4094 | 6.02E-09 | 0.8275862 | -2.6778 | 9.32E-24 | 0.846153846 | -3.192 | 3.87E-13 | 0.96 |
| DLK2     | 65989     | -2.6691 | 1.07E-08 | 0.8275862 | -2.3414 | 7.26E-16 | 0.75        | -2.142 | 3.30E-05 | 0.6  |
| PTHLH    | 5744      | -2.1524 | 3.63E-08 | 0.8275862 | -2.3709 | 3.63E-19 | 0.875       | -2.023 | 1.78E-05 | 0.72 |
| WISP2    | 8839      | -2.2822 | 4.03E-08 | 0.8275862 | -2.8125 | 8.03E-22 | 0.817307692 | -2.412 | 6.13E-07 | 0.76 |
| AREG     | 374       | -2.3752 | 1.42E-07 | 0.8275862 | -2.6948 | 1.24E-18 | 0.817307692 | NA     | NA       | NA   |
| IL6      | 3569      | -2.4217 | 3.39E-07 | 0.8275862 | -2.143  | 2.35E-13 | 0.817307692 | NA     | NA       | NA   |
| EGF      | 1950      | -3.1757 | 4.06E-07 | 0.8275862 | -2.6206 | 2.10E-11 | 0.75        | NA     | NA       | NA   |
| PIP      | 5304      | -5.1326 | 5.42E-07 | 0.8275862 | -6.7443 | 1.03E-23 | 0.913461538 | -4.97  | 4.83E-06 | 0.84 |
| NTF4     | 4909      | -2.3883 | 4.88E-06 | 0.8275862 | -2.6032 | 5.43E-15 | 0.778846154 | -2.244 | 8.89E-05 | 0.72 |
| SCGN     | 10590     | -2.3822 | 5.40E-06 | 0.8275862 | -3.4347 | 3.90E-23 | 0.923076923 | -2.891 | 5.35E-08 | 0.84 |
| GJB1     | 2705      | -2.4215 | 1.50E-05 | 0.8275862 | -2.5436 | 4.09E-11 | 0.807692308 | NA     | NA       | NA   |
| PDGFD    | 80310     | -2.923  | 3.28E-40 | 0.7931034 | -3.3699 | 1.08E-72 | 0.884615385 | -2.797 | 1.13E-30 | 0.72 |
| SH3BGRL2 | 83699     | -2.7812 | 4.45E-39 | 0.7931034 | -2.7221 | 2.76E-49 | 0.673076923 | -2.798 | 1.41E-28 | 0.68 |
| FAM47E   | 100129583 | -3.1947 | 3.16E-37 | 0.7931034 | -3.551  | 2.24E-59 | 0.855769231 | -2.885 | 1.77E-30 | 0.68 |
| LIFR     | 3977      | -3.4438 | 3.70E-36 | 0.7931034 | -3.437  | 1.07E-49 | 0.836538462 | -3.334 | 3.33E-29 | 0.8  |
| NOSTRIN  | 115677    | -3.0621 | 8.18E-36 | 0.7931034 | -3.7864 | 3.30E-61 | 0.855769231 | -2.877 | 3.68E-23 | 0.72 |

|           |        |         |          |           |         |          |             |        |          |      |
|-----------|--------|---------|----------|-----------|---------|----------|-------------|--------|----------|------|
| CORO2B    | 10391  | -2.8179 | 3.28E-35 | 0.7931034 | -3.4343 | 3.82E-51 | 0.836538462 | -2.703 | 8.46E-28 | 0.8  |
| FAM13C    | 220965 | -2.8701 | 5.88E-34 | 0.7931034 | -3.1877 | 1.71E-51 | 0.836538462 | -2.813 | 1.64E-26 | 0.8  |
| SCN3B     | 55800  | -2.9823 | 2.66E-32 | 0.7931034 | -3.5539 | 3.45E-52 | 0.865384615 | -2.663 | 2.18E-24 | 0.68 |
| TPPP      | 11076  | -3.1313 | 3.82E-31 | 0.7931034 | -3.1103 | 9.82E-50 | 0.769230769 | -2.34  | 1.07E-21 | 0.6  |
| USHBP1    | 83878  | -2.739  | 5.68E-31 | 0.7931034 | -3.0509 | 6.10E-56 | 0.846153846 | -2.063 | 6.53E-18 | 0.6  |
| MMRN2     | 79812  | -2.476  | 2.14E-30 | 0.7931034 | -2.7344 | 6.66E-56 | 0.798076923 | -2.01  | 4.15E-18 | 0.52 |
| TDRD10    | 126668 | -2.7642 | 1.37E-29 | 0.7931034 | -2.9304 | 2.56E-43 | 0.75        | NA     | NA       | NA   |
| DLGAP2    | 9228   | -2.7163 | 1.70E-29 | 0.7931034 | -2.9055 | 3.63E-42 | 0.807692308 | -2.871 | 1.27E-28 | 0.84 |
| SRPX      | 8406   | -2.6755 | 1.34E-28 | 0.7931034 | -2.8735 | 8.33E-48 | 0.817307692 | -2.386 | 1.55E-17 | 0.56 |
| IL33      | 90865  | -3.3084 | 1.48E-28 | 0.7931034 | -4.4241 | 7.72E-53 | 0.884615385 | -3.349 | 2.12E-18 | 0.72 |
| TSHZ2     | 128553 | -3.052  | 2.86E-27 | 0.7931034 | -3.4852 | 2.48E-48 | 0.855769231 | -3.148 | 9.65E-24 | 0.76 |
| STK32B    | 55351  | -2.7107 | 5.33E-27 | 0.7931034 | -3.406  | 9.17E-50 | 0.884615385 | -2.333 | 1.76E-20 | 0.72 |
| HOXA9     | 3205   | -2.862  | 1.84E-25 | 0.7931034 | -2.6045 | 4.98E-24 | 0.711538462 | NA     | NA       | NA   |
| ABCG2     | 9429   | -2.8431 | 2.42E-24 | 0.7931034 | -3.2422 | 2.80E-52 | 0.855769231 | -2.395 | 5.71E-20 | 0.68 |
| DNASE1L3  | 1776   | -3.3525 | 6.11E-24 | 0.7931034 | -4.1082 | 1.91E-42 | 0.846153846 | -3.282 | 2.48E-19 | 0.72 |
| SLC7A2    | 6542   | -3.3745 | 6.18E-24 | 0.7931034 | -3.9625 | 1.47E-46 | 0.865384615 | -2.444 | 1.82E-14 | 0.64 |
| HIF3A     | 64344  | -3.8517 | 6.19E-24 | 0.7931034 | -3.8127 | 1.13E-37 | 0.807692308 | -3.701 | 5.82E-21 | 0.76 |
| THSD7B    | 80731  | -3.1771 | 2.19E-23 | 0.7931034 | -3.7785 | 9.82E-45 | 0.865384615 | -3.495 | 2.17E-21 | 0.76 |
| DOC2B     | 8447   | -3.2226 | 6.71E-23 | 0.7931034 | -2.9503 | 2.22E-30 | 0.682692308 | -3.2   | 7.48E-20 | 0.68 |
| ITPR1     | 3708   | -2.8407 | 7.83E-23 | 0.7931034 | -3.0817 | 3.25E-52 | 0.817307692 | -2.779 | 4.47E-22 | 0.72 |
| LAMA3     | 3909   | -3.5538 | 1.01E-22 | 0.7931034 | -3.639  | 8.52E-41 | 0.865384615 | -3.006 | 2.96E-16 | 0.76 |
| COL25A1   | 84570  | -2.9681 | 1.29E-22 | 0.7931034 | -2.838  | 1.97E-27 | 0.769230769 | -3.12  | 4.23E-19 | 0.72 |
| LOC286367 | 286367 | -2.0843 | 1.44E-22 | 0.7931034 | -2.2572 | 8.39E-47 | 0.730769231 | -2.638 | 6.10E-26 | 0.84 |
| NTN4      | 59277  | -2.8184 | 1.46E-22 | 0.7931034 | -3.5361 | 4.47E-53 | 0.894230769 | -2.703 | 4.63E-16 | 0.72 |
| EHD2      | 30846  | -2.3667 | 1.57E-22 | 0.7931034 | -2.5508 | 7.57E-44 | 0.740384615 | NA     | NA       | NA   |
| CAV2      | 858    | -2.4675 | 2.18E-22 | 0.7931034 | -2.7035 | 9.88E-45 | 0.75        | -2.209 | 3.30E-17 | 0.68 |
| LPHN3     | 23284  | -3.1966 | 3.67E-22 | 0.7931034 | -3.377  | 6.90E-27 | 0.759615385 | -3.192 | 1.62E-15 | 0.76 |
| GPER      | 2852   | -2.4066 | 1.84E-21 | 0.7931034 | -2.397  | 8.65E-36 | 0.721153846 | NA     | NA       | NA   |
| FMO2      | 2327   | -2.9081 | 2.77E-21 | 0.7931034 | -3.7323 | 7.71E-42 | 0.826923077 | -3.254 | 2.04E-23 | 0.68 |

|           |        |         |          |           |         |          |             |        |          |      |
|-----------|--------|---------|----------|-----------|---------|----------|-------------|--------|----------|------|
| GSN       | 2934   | -2.1463 | 4.29E-21 | 0.7931034 | -2.2761 | 5.20E-48 | 0.788461538 | -2.018 | 7.36E-17 | 0.64 |
| CABP1     | 9478   | -2.8406 | 6.19E-21 | 0.7931034 | -2.5706 | 6.36E-35 | 0.788461538 | -2.111 | 2.35E-13 | 0.8  |
| GPR109B   | 8843   | -2.7531 | 7.84E-21 | 0.7931034 | -2.8603 | 9.45E-42 | 0.817307692 | -2.44  | 6.65E-15 | 0.6  |
| GRM7      | 2917   | -2.6399 | 1.64E-20 | 0.7931034 | -2.5621 | 8.33E-35 | 0.817307692 | -2.18  | 6.22E-13 | 0.76 |
| CCDC36    | 339834 | -2.5525 | 3.40E-19 | 0.7931034 | -2.7766 | 5.05E-44 | 0.894230769 | -2.542 | 3.81E-17 | 0.84 |
| SCN9A     | 6335   | -2.5955 | 7.33E-17 | 0.7931034 | -2.6531 | 4.93E-34 | 0.836538462 | -2.207 | 4.43E-13 | 0.68 |
| ANKRD53   | 79998  | -2.4335 | 2.17E-16 | 0.7931034 | -2.2006 | 4.25E-26 | 0.692307692 | -2.569 | 1.49E-14 | 0.72 |
| TBX15     | 6913   | -2.2271 | 2.24E-16 | 0.7931034 | -2.5962 | 1.86E-32 | 0.807692308 | -2.418 | 9.02E-16 | 0.76 |
| LDHD      | 197257 | -2.8791 | 3.61E-16 | 0.7931034 | -3.5364 | 5.55E-38 | 0.855769231 | -2.277 | 6.83E-12 | 0.76 |
| CCDC69    | 26112  | -2.5687 | 4.97E-16 | 0.7931034 | -2.9097 | 3.98E-38 | 0.855769231 | -2.745 | 5.02E-16 | 0.8  |
| AKR1C3    | 8644   | -2.4131 | 9.03E-16 | 0.7931034 | -2.7507 | 1.02E-25 | 0.692307692 | NA     | NA       | NA   |
| STBD1     | 8987   | -2.0885 | 1.43E-15 | 0.7931034 | -2.2597 | 4.30E-34 | 0.788461538 | -2.038 | 3.98E-13 | 0.72 |
| PDZD2     | 23037  | -2.3767 | 1.49E-15 | 0.7931034 | -2.7171 | 2.13E-36 | 0.778846154 | -2.509 | 6.27E-15 | 0.72 |
| ABCC6P1   | 653190 | -2.6516 | 1.72E-15 | 0.7931034 | -2.8944 | 3.79E-35 | 0.846153846 | -2.66  | 1.94E-13 | 0.72 |
| TFF3      | 7033   | -4.2414 | 1.83E-15 | 0.7931034 | -5.1042 | 1.48E-32 | 0.894230769 | -2.996 | 2.86E-08 | 0.64 |
| C21orf15  | 54094  | -3.0413 | 2.15E-15 | 0.7931034 | -3.0911 | 4.44E-30 | 0.836538462 | -3.157 | 2.18E-15 | 0.8  |
| CNTFR     | 1271   | -3.0769 | 4.17E-15 | 0.7931034 | -3.776  | 1.05E-27 | 0.778846154 | -2.454 | 1.95E-08 | 0.64 |
| HAS3      | 3038   | -3.1251 | 4.17E-15 | 0.7931034 | -3.2447 | 1.12E-32 | 0.865384615 | -2.706 | 5.40E-10 | 0.76 |
| GPLD1     | 2822   | -2.9883 | 6.05E-15 | 0.7931034 | -2.618  | 7.97E-26 | 0.788461538 | -2.77  | 1.82E-11 | 0.8  |
| TESC      | 54997  | -2.6798 | 1.05E-14 | 0.7931034 | -2.918  | 1.79E-32 | 0.836538462 | -2.28  | 1.38E-11 | 0.68 |
| BCHE      | 590    | -2.7213 | 5.85E-14 | 0.7931034 | -2.953  | 1.96E-24 | 0.75        | -3.187 | 4.49E-16 | 0.8  |
| LOC440173 | 440173 | -2.3708 | 7.30E-14 | 0.7931034 | -2.2446 | 1.06E-20 | 0.788461538 | NA     | NA       | NA   |
| C11orf53  | 341032 | -2.5286 | 8.40E-14 | 0.7931034 | -2.2588 | 6.72E-17 | 0.721153846 | NA     | NA       | NA   |
| RNF157    | 114804 | -2.4434 | 1.14E-13 | 0.7931034 | -2.797  | 5.45E-30 | 0.817307692 | -2.717 | 2.48E-15 | 0.88 |
| SOX5      | 6660   | -2.4949 | 1.85E-13 | 0.7931034 | -2.9358 | 6.45E-29 | 0.778846154 | -3.434 | 1.08E-19 | 0.88 |
| MT1A      | 4489   | -2.7224 | 1.87E-13 | 0.7931034 | -2.608  | 3.36E-21 | 0.759615385 | -2.539 | 7.36E-12 | 0.8  |
| HTR2A     | 3356   | -2.9045 | 3.16E-13 | 0.7931034 | -2.5809 | 2.59E-19 | 0.75        | -3.191 | 5.72E-14 | 0.8  |
| ABCC8     | 6833   | -4.1327 | 8.70E-13 | 0.7931034 | -4.7023 | 5.06E-34 | 0.913461538 | -3.504 | 1.01E-08 | 0.8  |
| CDKL2     | 8999   | -2.9083 | 1.43E-12 | 0.7931034 | -2.73   | 1.60E-21 | 0.759615385 | -2.974 | 5.77E-12 | 0.76 |

|           |        |         |          |           |         |          |             |        |             |      |
|-----------|--------|---------|----------|-----------|---------|----------|-------------|--------|-------------|------|
| CYP4X1    | 260293 | -3.1273 | 2.38E-12 | 0.7931034 | -3.4304 | 6.90E-24 | 0.730769231 | -2.761 | 6.35E-09    | 0.72 |
| PKD1L2    | 114780 | -2.9529 | 2.62E-12 | 0.7931034 | -3.2119 | 4.81E-28 | 0.865384615 | -3.428 | 1.12E-14    | 0.92 |
| DRD1      | 1812   | -2.3087 | 6.19E-12 | 0.7931034 | -2.5266 | 7.12E-28 | 0.798076923 | -2.191 | 5.75E-10    | 0.64 |
| EFCAB1    | 79645  | -3.0358 | 1.02E-11 | 0.7931034 | -3.363  | 1.31E-25 | 0.826923077 | -3.167 | 1.03E-10    | 0.76 |
| FAM166B   | 730112 | -2.3486 | 1.35E-11 | 0.7931034 | -2.4725 | 4.76E-23 | 0.865384615 | -2.518 | 2.38E-11    | 0.84 |
| EGR2      | 1959   | -2.1694 | 1.59E-11 | 0.7931034 | -2.4766 | 3.62E-28 | 0.807692308 | -2.196 | 7.14E-10    | 0.76 |
| TSPAN8    | 7103   | -2.7487 | 1.76E-11 | 0.7931034 | -2.5856 | 1.03E-12 | 0.644230769 | NA     | NA          | NA   |
| LPPR1     | 54886  | -2.8602 | 2.29E-11 | 0.7931034 | -3.3684 | 4.64E-27 | 0.836538462 | -3.092 | 4.91E-11    | 0.76 |
| TFPI2     | 7980   | -2.684  | 9.47E-11 | 0.7931034 | -3.0534 | 2.33E-22 | 0.865384615 | -2.564 | 3.05E-08    | 0.8  |
| IL17B     | 27190  | -3.2206 | 1.22E-10 | 0.7931034 | -3.5166 | 5.14E-26 | 0.875       | -3.186 | 3.12E-10    | 0.8  |
| THSD4     | 79875  | -2.4118 | 1.29E-10 | 0.7931034 | -3.2677 | 7.57E-33 | 0.865384615 | -2.711 | 5.04E-11    | 0.76 |
| C13orf33  | 84935  | -2.2094 | 2.22E-10 | 0.7931034 | -2.4928 | 1.30E-23 | 0.759615385 | NA     | NA          | NA   |
| CLIC6     | 54102  | -2.0611 | 3.12E-10 | 0.7931034 | -2.6724 | 2.20E-24 | 0.836538462 | -2.423 | 2.90E-10    | 0.76 |
| PHF21B    | 112885 | -2.2811 | 6.09E-10 | 0.7931034 | NA      | NA       | NA          | NA     | NA          | NA   |
| CNTN6     | 27255  | -2.0614 | 7.67E-10 | 0.7931034 | -2.339  | 3.31E-22 | 0.788461538 | -2.167 | 8.67E-10    | 0.72 |
| GREB1     | 9687   | -2.3717 | 8.22E-10 | 0.7931034 | -2.6245 | 3.49E-23 | 0.836538462 | -2.208 | 2.15E-07    | 0.68 |
| LOC145837 | 145837 | -2.824  | 2.55E-09 | 0.7931034 | -3.1993 | 3.44E-25 | 0.913461538 | -2.257 | 3.32E-06    | 0.72 |
| DPY19L2P4 | 442523 | -2.3757 | 4.32E-09 | 0.7931034 | -2.3477 | 4.17E-18 | 0.759615385 | -2.761 | 1.06E-09    | 0.88 |
| DRD2      | 1813   | -2.5099 | 7.08E-09 | 0.7931034 | -2.2981 | 1.96E-14 | 0.663461538 | -2.003 | 2.89E-05    | 0.64 |
| SPHKAP    | 80309  | -3.2372 | 2.69E-08 | 0.7931034 | -2.5653 | 8.76E-11 | 0.692307692 | -4.134 | 5.69E-12    | 0.92 |
| TMEM26    | 219623 | -2.0982 | 3.77E-08 | 0.7931034 | -2.409  | 1.08E-23 | 0.836538462 | -2.082 | 2.60E-07    | 0.8  |
| BCAS1     | 8537   | -2.4179 | 8.53E-08 | 0.7931034 | -2.9651 | 2.45E-20 | 0.769230769 | NA     | NA          | NA   |
| SPATA22   | 84690  | -2.0616 | 1.32E-07 | 0.7931034 | NA      | NA       | NA          | -2.01  | 1.76E-06    | 0.8  |
| PIK3C2G   | 5288   | -3.0856 | 4.78E-07 | 0.7931034 | -3.5001 | 1.45E-16 | 0.759615385 | -2.24  | 0.000737178 | 0.52 |
| C2CD4B    | 388125 | -2.1679 | 1.01E-06 | 0.7931034 | -2.3391 | 2.48E-14 | 0.836538462 | NA     | NA          | NA   |
| FLJ45983  | 399717 | -2.3683 | 1.11E-06 | 0.7931034 | -2.4001 | 6.22E-14 | 0.75        | NA     | NA          | NA   |
| DSC1      | 1823   | -2.4774 | 1.23E-06 | 0.7931034 | -2.9383 | 2.89E-20 | 0.875       | -2.392 | 1.03E-05    | 0.76 |
| FCN2      | 2220   | -2.1313 | 1.35E-05 | 0.7931034 | -3.2209 | 3.40E-25 | 0.875       | -2.588 | 4.63E-08    | 0.84 |
| NRG1      | 3084   | -2.079  | 6.09E-05 | 0.7931034 | -2.7717 | 8.85E-15 | 0.778846154 | -2.659 | 7.68E-06    | 0.68 |

|              |           |         |             |           |         |          |             |        |          |      |
|--------------|-----------|---------|-------------|-----------|---------|----------|-------------|--------|----------|------|
| LOC642587    | 642587    | -2.7497 | 7.34E-05    | 0.7931034 | -2.2812 | 7.75E-08 | 0.721153846 | NA     | NA       | NA   |
| AGR2         | 10551     | -2.8921 | 0.000144539 | 0.7931034 | -3.9318 | 6.12E-15 | 0.865384615 | NA     | NA       | NA   |
| JAM2         | 58494     | -2.6427 | 7.26E-43    | 0.7586207 | -3.0302 | 2.98E-60 | 0.798076923 | -2.07  | 5.82E-24 | 0.64 |
| HOXA4        | 3201      | -2.8389 | 2.90E-37    | 0.7586207 | -2.6071 | 1.00E-30 | 0.605769231 | NA     | NA       | NA   |
| SPARCL1      | 8404      | -2.4676 | 1.53E-35    | 0.7586207 | -3.2156 | 4.35E-67 | 0.817307692 | -2.47  | 1.10E-30 | 0.68 |
| PPP1R12B     | 4660      | -2.348  | 3.35E-35    | 0.7586207 | -2.6302 | 8.80E-63 | 0.846153846 | -2.245 | 1.62E-25 | 0.68 |
| CXorf36      | 79742     | -2.471  | 3.63E-33    | 0.7586207 | -2.7456 | 2.32E-60 | 0.817307692 | -2.023 | 1.06E-19 | 0.52 |
| KIAA1377     | 57562     | -2.7297 | 7.85E-31    | 0.7586207 | -3.0612 | 1.58E-54 | 0.798076923 | -2.931 | 4.98E-29 | 0.72 |
| CXCL14       | 9547      | -3.0891 | 1.01E-30    | 0.7586207 | -3.828  | 6.37E-39 | 0.788461538 | -3.261 | 1.18E-17 | 0.72 |
| MYCT1        | 80177     | -2.3949 | 1.46E-29    | 0.7586207 | -2.8182 | 7.37E-55 | 0.798076923 | -2.013 | 2.95E-17 | 0.52 |
| GNG11        | 2791      | -2.4805 | 6.19E-29    | 0.7586207 | -2.7311 | 1.09E-54 | 0.817307692 | NA     | NA       | NA   |
| NECAB1       | 64168     | -2.6178 | 1.38E-28    | 0.7586207 | -2.7855 | 6.94E-41 | 0.788461538 | -2.441 | 2.41E-22 | 0.72 |
| ACADSB       | 36        | -2.433  | 2.84E-28    | 0.7586207 | -2.4131 | 8.75E-45 | 0.740384615 | -2.503 | 1.95E-21 | 0.76 |
| NAP1L2       | 4674      | -2.8492 | 1.23E-27    | 0.7586207 | -3.4167 | 9.54E-43 | 0.778846154 | -2.899 | 3.34E-18 | 0.56 |
| DMD          | 1756      | -2.6535 | 1.23E-27    | 0.7586207 | -2.5471 | 3.34E-39 | 0.711538462 | -2.844 | 3.31E-26 | 0.64 |
| TFPI         | 7035      | -2.3047 | 2.81E-26    | 0.7586207 | -2.5728 | 3.18E-47 | 0.721153846 | NA     | NA       | NA   |
| TNNI3K       | 51086     | -2.7692 | 7.94E-26    | 0.7586207 | -3.1073 | 2.46E-43 | 0.759615385 | -3.681 | 1.42E-34 | 0.92 |
| COL14A1      | 7373      | -3.3012 | 1.58E-25    | 0.7586207 | -3.5998 | 9.41E-42 | 0.788461538 | -2.673 | 2.47E-18 | 0.72 |
| FAM70A       | 55026     | -2.7612 | 2.52E-24    | 0.7586207 | -3.4721 | 7.45E-50 | 0.865384615 | -2.891 | 1.30E-23 | 0.76 |
| LAMA2        | 3908      | -2.8008 | 3.73E-24    | 0.7586207 | -3.4706 | 2.08E-47 | 0.836538462 | -2.803 | 1.23E-19 | 0.72 |
| PTPRB        | 5787      | -2.5059 | 4.47E-24    | 0.7586207 | -2.9991 | 1.16E-51 | 0.855769231 | -2.464 | 3.08E-18 | 0.68 |
| PER1         | 5187      | -2.503  | 4.70E-24    | 0.7586207 | -2.4835 | 7.14E-41 | 0.778846154 | -2.145 | 6.53E-19 | 0.72 |
| TGFBR2       | 7048      | -2.2689 | 8.98E-24    | 0.7586207 | -2.7862 | 1.47E-58 | 0.826923077 | -2.342 | 5.67E-23 | 0.68 |
| LONRF2       | 164832    | -3.2529 | 9.57E-24    | 0.7586207 | -3.0195 | 8.60E-26 | 0.653846154 | -3.183 | 4.34E-17 | 0.6  |
| IGF2         | 3481      | -2.7933 | 1.14E-23    | 0.7586207 | -2.9938 | 1.57E-25 | 0.759615385 | -2.346 | 1.00E-11 | 0.64 |
| TBC1D9       | 23158     | -2.4059 | 1.37E-23    | 0.7586207 | -2.7287 | 1.44E-48 | 0.807692308 | -2.077 | 1.84E-17 | 0.72 |
| SLIT3        | 6586      | -2.7976 | 1.86E-23    | 0.7586207 | -3.2511 | 7.66E-43 | 0.807692308 | -2.681 | 1.76E-18 | 0.72 |
| LOC100190938 | 100190938 | -2.8222 | 7.85E-23    | 0.7586207 | -2.9116 | 1.50E-38 | 0.711538462 | -2.463 | 2.31E-17 | 0.6  |
| ADHFE1       | 137872    | -2.3055 | 1.73E-22    | 0.7586207 | -2.8186 | 8.87E-40 | 0.740384615 | -2.744 | 1.12E-20 | 0.8  |

|           |        |         |          |           |         |          |             |        |          |      |
|-----------|--------|---------|----------|-----------|---------|----------|-------------|--------|----------|------|
| SLC47A2   | 146802 | -2.3837 | 6.23E-22 | 0.7586207 | -2.3274 | 1.90E-29 | 0.846153846 | -2.12  | 1.07E-16 | 0.68 |
| PRTG      | 283659 | -2.3989 | 7.01E-22 | 0.7586207 | -2.6566 | 4.63E-34 | 0.701923077 | -2.177 | 9.30E-15 | 0.64 |
| PGM5P2    | 595135 | -2.1242 | 1.11E-20 | 0.7586207 | NA      | NA       | NA          | NA     | NA       | NA   |
| ABCB1     | 5243   | -2.667  | 1.75E-20 | 0.7586207 | -3.5163 | 2.15E-44 | 0.817307692 | -3.002 | 4.34E-19 | 0.8  |
| TMEM22    | 80723  | -2.2593 | 2.66E-20 | 0.7586207 | -2.1451 | 4.22E-35 | 0.682692308 | NA     | NA       | NA   |
| FGF2      | 2247   | -2.848  | 2.74E-20 | 0.7586207 | -3.2465 | 2.67E-40 | 0.75        | -3.423 | 8.00E-23 | 0.8  |
| VWF       | 7450   | -2.4514 | 7.94E-20 | 0.7586207 | -2.531  | 2.37E-42 | 0.778846154 | -2.177 | 2.75E-14 | 0.72 |
| GPM6A     | 2823   | -3.2352 | 4.03E-19 | 0.7586207 | -3.8615 | 2.47E-39 | 0.836538462 | -3.876 | 2.92E-18 | 0.84 |
| RGS7BP    | 401190 | -3.0704 | 6.29E-19 | 0.7586207 | -2.8113 | 9.99E-24 | 0.740384615 | -2.794 | 1.96E-13 | 0.72 |
| VIPR2     | 7434   | -2.8107 | 2.74E-18 | 0.7586207 | -3.0455 | 1.03E-27 | 0.711538462 | -3.157 | 2.77E-18 | 0.72 |
| PLP1      | 5354   | -3.4274 | 2.29E-17 | 0.7586207 | -3.4153 | 2.24E-21 | 0.701923077 | -3.687 | 1.82E-19 | 0.76 |
| AR        | 367    | -3.4642 | 1.36E-16 | 0.7586207 | -4.8324 | 4.56E-39 | 0.865384615 | -3.987 | 5.47E-17 | 0.72 |
| PTPRT     | 11122  | -3.7288 | 6.21E-16 | 0.7586207 | -4.8949 | 8.06E-39 | 0.903846154 | -3.921 | 2.68E-14 | 0.72 |
| VIP       | 7432   | -2.295  | 3.61E-15 | 0.7586207 | -2.5097 | 4.47E-38 | 0.836538462 | -2.07  | 1.23E-11 | 0.84 |
| RASD1     | 51655  | -2.3986 | 4.98E-15 | 0.7586207 | -2.3119 | 8.55E-24 | 0.634615385 | NA     | NA       | NA   |
| WFIKKN2   | 124857 | -2.0485 | 5.77E-15 | 0.7586207 | NA      | NA       | NA          | -2.09  | 1.98E-13 | 0.8  |
| ARC       | 23237  | -2.965  | 6.04E-15 | 0.7586207 | -2.7971 | 3.25E-23 | 0.721153846 | -2.022 | 5.63E-08 | 0.68 |
| SLC5A4    | 6527   | -2.2322 | 1.40E-14 | 0.7586207 | -2.6203 | 6.60E-36 | 0.836538462 | -2.109 | 4.96E-10 | 0.6  |
| SLC7A14   | 57709  | -2.4773 | 3.51E-14 | 0.7586207 | -2.7486 | 1.06E-34 | 0.875       | -2.571 | 3.83E-12 | 0.84 |
| CACNA2D2  | 9254   | -2.2521 | 5.37E-14 | 0.7586207 | -2.3288 | 4.47E-28 | 0.759615385 | NA     | NA       | NA   |
| CRTAC1    | 55118  | -2.7723 | 2.18E-12 | 0.7586207 | -2.436  | 1.21E-15 | 0.644230769 | -3.246 | 3.01E-16 | 0.76 |
| CCBE1     | 147372 | -2.2685 | 3.31E-12 | 0.7586207 | -2.6504 | 2.74E-32 | 0.865384615 | -2.292 | 3.18E-10 | 0.68 |
| HRNR      | 388697 | -2.0837 | 3.52E-12 | 0.7586207 | -2.3869 | 1.69E-27 | 0.759615385 | NA     | NA       | NA   |
| AKR1C2    | 1646   | -3.4696 | 3.71E-12 | 0.7586207 | -4.389  | 1.54E-27 | 0.884615385 | -3.478 | 9.98E-11 | 0.76 |
| ALDH2     | 217    | -2.1116 | 9.80E-12 | 0.7586207 | -2.2718 | 4.29E-30 | 0.778846154 | -2.038 | 1.63E-09 | 0.64 |
| C4BPB     | 725    | -2.4646 | 1.21E-11 | 0.7586207 | NA      | NA       | NA          | NA     | NA       | NA   |
| LOC148696 | 148696 | -2.1152 | 2.07E-11 | 0.7586207 | -2.4648 | 2.04E-32 | 0.865384615 | -2.358 | 1.39E-11 | 0.76 |
| KCNA1     | 3736   | -2.519  | 2.25E-11 | 0.7586207 | -3.1001 | 1.24E-23 | 0.807692308 | -3.57  | 1.25E-15 | 0.88 |
| GPR182    | 11318  | -2.1099 | 3.06E-11 | 0.7586207 | -2.2685 | 1.73E-27 | 0.836538462 | NA     | NA       | NA   |



|          |        |         |             |           |         |          |             |        |             |      |
|----------|--------|---------|-------------|-----------|---------|----------|-------------|--------|-------------|------|
| NPC1L1   | 29881  | -2.0984 | 4.33E-11    | 0.7586207 | -2.1271 | 2.96E-24 | 0.75        | NA     | NA          | NA   |
| ANKRD43  | 134548 | -2.2306 | 4.95E-11    | 0.7586207 | -2.4184 | 3.21E-22 | 0.740384615 | -2.109 | 2.15E-09    | 0.6  |
| UBXN10   | 127733 | -2.2057 | 6.05E-11    | 0.7586207 | -2.6251 | 3.84E-25 | 0.711538462 | NA     | NA          | NA   |
| TMC2     | 117532 | -2.2952 | 7.06E-11    | 0.7586207 | -2.6916 | 1.27E-34 | 0.913461538 | -2.257 | 3.73E-10    | 0.84 |
| NMUR1    | 10316  | -2.5121 | 1.11E-10    | 0.7586207 | -2.5236 | 7.00E-24 | 0.788461538 | -2.69  | 1.42E-10    | 0.84 |
| IGFN1    | 91156  | -2.253  | 1.16E-10    | 0.7586207 | -2.5034 | 1.96E-24 | 0.798076923 | NA     | NA          | NA   |
| CA12     | 771    | -2.4406 | 1.84E-10    | 0.7586207 | -2.8684 | 1.28E-28 | 0.807692308 | -2.26  | 1.44E-07    | 0.56 |
| CD209    | 30835  | -2.4784 | 1.91E-10    | 0.7586207 | -2.0489 | 1.32E-16 | 0.692307692 | NA     | NA          | NA   |
| PTCHD3   | 374308 | -2.6127 | 6.57E-10    | 0.7586207 | -2.64   | 2.08E-17 | 0.778846154 | -2.785 | 1.95E-09    | 0.76 |
| TP53TG3B | 729355 | -2.0626 | 8.23E-10    | 0.7586207 | -2.0541 | 3.69E-18 | 0.807692308 | -2.255 | 4.52E-10    | 0.84 |
| FAM5B    | 57795  | -2.46   | 6.68E-09    | 0.7586207 | NA      | NA       | NA          | NA     | NA          | NA   |
| CYP4Z1   | 199974 | -4.0412 | 1.98E-08    | 0.7586207 | -4.8221 | 8.84E-25 | 0.913461538 | -2.63  | 0.000344915 | 0.64 |
| MGC45800 | 90768  | -2.0373 | 2.84E-08    | 0.7586207 | -2.2096 | 3.98E-17 | 0.788461538 | -2.06  | 2.19E-06    | 0.68 |
| NEUROG2  | 63973  | -2.8414 | 3.69E-08    | 0.7586207 | -2.6121 | 1.68E-13 | 0.817307692 | -3.27  | 1.16E-09    | 0.88 |
| NR4A1    | 3164   | -2.0271 | 1.31E-07    | 0.7586207 | -2.0047 | 7.78E-18 | 0.788461538 | NA     | NA          | NA   |
| LPPR3    | 79948  | -2.7233 | 1.12E-06    | 0.7586207 | NA      | NA       | NA          | NA     | NA          | NA   |
| KLHL30   | 377007 | -2.0646 | 1.19E-06    | 0.7586207 | -2.1011 | 6.66E-13 | 0.75        | NA     | NA          | NA   |
| CYP4Z2P  | 163720 | -3.1628 | 1.56E-06    | 0.7586207 | -4.2767 | 1.11E-24 | 0.884615385 | -2.44  | 0.000195172 | 0.72 |
| HAP1     | 9001   | -2.3084 | 5.61E-06    | 0.7586207 | NA      | NA       | NA          | NA     | NA          | NA   |
| PI15     | 51050  | -2.6286 | 7.94E-06    | 0.7586207 | -2.4657 | 1.49E-10 | 0.769230769 | -2.658 | 2.50E-05    | 0.8  |
| GP2      | 2813   | -2.95   | 1.82E-05    | 0.7586207 | -4.1379 | 1.87E-20 | 0.903846154 | -2.921 | 9.06E-05    | 0.84 |
| TCN1     | 6947   | -2.8894 | 0.000111918 | 0.7586207 | -3.7432 | 1.67E-14 | 0.855769231 | -2.493 | 0.001673266 | 0.68 |
| GPR98    | 84059  | -2.1448 | 0.000261167 | 0.7586207 | -2.8331 | 4.29E-14 | 0.788461538 | -2.127 | 0.000834499 | 0.76 |
| SCGB3A1  | 92304  | -2.397  | 0.000536928 | 0.7586207 | -3.5141 | 1.38E-14 | 0.817307692 | -2.434 | 0.0013232   | 0.72 |
| SPRY1    | 10252  | -2.4277 | 4.03E-36    | 0.7241379 | -2.6361 | 1.09E-53 | 0.75        | NA     | NA          | NA   |
| EMCN     | 51705  | -2.5199 | 1.17E-35    | 0.7241379 | -3.0388 | 3.08E-57 | 0.826923077 | -2.133 | 1.76E-20    | 0.52 |
| CACHD1   | 57685  | -2.6073 | 3.81E-35    | 0.7241379 | -2.2886 | 1.14E-43 | 0.576923077 | -2.308 | 3.82E-28    | 0.68 |
| RAI2     | 10742  | -2.5799 | 1.47E-33    | 0.7241379 | -3.3681 | 3.36E-59 | 0.865384615 | -2.931 | 4.53E-31    | 0.76 |
| FAM162B  | 221303 | -2.8862 | 1.13E-31    | 0.7241379 | -3.2009 | 5.75E-56 | 0.875       | -2.302 | 2.21E-18    | 0.56 |

|           |        |         |          |           |         |          |             |        |          |      |
|-----------|--------|---------|----------|-----------|---------|----------|-------------|--------|----------|------|
| PCDHGB7   | 56099  | -2.8086 | 2.37E-31 | 0.7241379 | -3.2933 | 1.54E-46 | 0.75        | -3.142 | 5.33E-32 | 0.76 |
| RNASE4    | 6038   | -2.4104 | 2.99E-31 | 0.7241379 | -2.9524 | 4.56E-63 | 0.865384615 | -2.254 | 1.17E-21 | 0.68 |
| NAV3      | 89795  | -2.8402 | 5.10E-31 | 0.7241379 | -3.4398 | 1.16E-51 | 0.836538462 | -2.813 | 2.59E-25 | 0.68 |
| WSCD1     | 23302  | -2.8903 | 8.58E-31 | 0.7241379 | -2.7567 | 9.03E-35 | 0.730769231 | NA     | NA       | NA   |
| AHNAK     | 79026  | -2.335  | 5.92E-30 | 0.7241379 | -2.9371 | 1.16E-60 | 0.807692308 | -2.463 | 8.91E-28 | 0.6  |
| HOXA2     | 3199   | -2.975  | 9.51E-28 | 0.7241379 | -2.6557 | 9.02E-31 | 0.644230769 | -2.09  | 4.36E-18 | 0.6  |
| SHE       | 126669 | -2.4777 | 2.83E-27 | 0.7241379 | -2.9769 | 1.45E-52 | 0.778846154 | NA     | NA       | NA   |
| TAL1      | 6886   | -2.3519 | 1.78E-25 | 0.7241379 | -2.7471 | 5.73E-45 | 0.75        | -2.029 | 1.08E-16 | 0.56 |
| TMEM88    | 92162  | -2.378  | 1.96E-25 | 0.7241379 | -2.5762 | 5.32E-47 | 0.759615385 | NA     | NA       | NA   |
| PCDHGA2   | 56113  | -2.7768 | 2.98E-25 | 0.7241379 | -3.3794 | 1.26E-35 | 0.778846154 | -2.758 | 4.24E-22 | 0.72 |
| S1PR1     | 1901   | -2.3197 | 2.31E-24 | 0.7241379 | -2.7047 | 2.24E-50 | 0.788461538 | -2.051 | 1.52E-16 | 0.64 |
| PHYHD1    | 254295 | -2.7676 | 3.45E-24 | 0.7241379 | -3.7891 | 1.57E-41 | 0.778846154 | -2.76  | 5.63E-19 | 0.6  |
| DCLK1     | 9201   | -2.6701 | 4.89E-24 | 0.7241379 | -2.9432 | 1.13E-39 | 0.769230769 | -2.689 | 8.25E-21 | 0.56 |
| DENND2A   | 27147  | -2.4116 | 6.48E-24 | 0.7241379 | -2.3527 | 4.40E-30 | 0.634615385 | -2.16  | 3.64E-17 | 0.64 |
| ARHGEF15  | 22899  | -2.2807 | 1.37E-23 | 0.7241379 | -2.5264 | 4.47E-48 | 0.788461538 | NA     | NA       | NA   |
| PALMD     | 54873  | -2.6092 | 1.71E-23 | 0.7241379 | -2.9911 | 9.57E-47 | 0.817307692 | -2.223 | 1.35E-16 | 0.6  |
| DCN       | 1634   | -2.495  | 3.15E-23 | 0.7241379 | -3.3192 | 1.98E-37 | 0.855769231 | -2.912 | 1.41E-20 | 0.68 |
| C14orf132 | 56967  | -2.4122 | 6.29E-23 | 0.7241379 | -2.6604 | 5.73E-32 | 0.634615385 | -2.504 | 1.55E-21 | 0.6  |
| C8orf79   | 57604  | -2.7645 | 1.57E-22 | 0.7241379 | -3.6807 | 6.28E-46 | 0.884615385 | -3.36  | 8.05E-20 | 0.64 |
| LTBP4     | 8425   | -2.1144 | 1.95E-22 | 0.7241379 | -2.33   | 1.11E-41 | 0.692307692 | -2.065 | 4.50E-20 | 0.6  |
| TEK       | 7010   | -2.3469 | 2.55E-22 | 0.7241379 | -2.8678 | 5.95E-45 | 0.798076923 | -2.211 | 2.94E-15 | 0.64 |
| ADRA2A    | 150    | -2.8085 | 4.13E-22 | 0.7241379 | -3.4249 | 8.26E-45 | 0.826923077 | -3.307 | 1.31E-19 | 0.72 |
| TMEM232   | 642987 | -2.4807 | 1.22E-21 | 0.7241379 | -2.7174 | 1.46E-40 | 0.769230769 | -2.526 | 2.45E-21 | 0.72 |
| FLJ42875  | 440556 | -2.653  | 1.74E-21 | 0.7241379 | -2.8004 | 1.39E-37 | 0.817307692 | -2.314 | 3.82E-16 | 0.72 |
| RYR3      | 6263   | -2.5822 | 5.26E-21 | 0.7241379 | -2.6915 | 3.44E-32 | 0.759615385 | -2.644 | 3.61E-17 | 0.72 |
| TACR1     | 6869   | -2.8499 | 1.01E-20 | 0.7241379 | -3.1165 | 2.59E-30 | 0.711538462 | -3.121 | 2.43E-18 | 0.68 |
| PALM      | 5064   | -2.8538 | 1.06E-20 | 0.7241379 | -2.9673 | 5.09E-35 | 0.759615385 | -2.592 | 3.39E-15 | 0.68 |
| VIT       | 5212   | -3.3643 | 1.48E-20 | 0.7241379 | -4.1118 | 7.44E-34 | 0.769230769 | -4.027 | 1.26E-25 | 0.8  |
| ADAMTS1   | 9510   | -2.1461 | 1.81E-20 | 0.7241379 | -2.0766 | 1.94E-33 | 0.663461538 | NA     | NA       | NA   |

|            |        |         |          |           |         |          |             |        |          |      |
|------------|--------|---------|----------|-----------|---------|----------|-------------|--------|----------|------|
| SOX17      | 64321  | -2.4383 | 4.55E-20 | 0.7241379 | -2.7062 | 3.17E-41 | 0.836538462 | NA     | NA       | NA   |
| LOC283174  | 283174 | -3.0932 | 3.49E-19 | 0.7241379 | -3.637  | 1.30E-36 | 0.788461538 | -3.46  | 2.82E-21 | 0.68 |
| CLDN11     | 5010   | -2.6173 | 4.41E-19 | 0.7241379 | -3.8094 | 9.30E-53 | 0.903846154 | -3.413 | 2.09E-25 | 0.8  |
| RBP7       | 116362 | -2.5025 | 5.98E-19 | 0.7241379 | -2.4042 | 7.53E-30 | 0.634615385 | -2.219 | 1.05E-14 | 0.64 |
| GPR44      | 11251  | -2.0461 | 6.87E-19 | 0.7241379 | -2.6288 | 7.50E-57 | 0.836538462 | -2.11  | 5.06E-20 | 0.76 |
| ANK2       | 287    | -2.5277 | 1.24E-18 | 0.7241379 | -2.9105 | 3.50E-43 | 0.846153846 | -2.767 | 1.07E-16 | 0.8  |
| CYP4F12    | 66002  | -3.2689 | 1.61E-18 | 0.7241379 | -3.9091 | 7.79E-38 | 0.817307692 | -2.625 | 3.29E-14 | 0.72 |
| SIK2       | 23235  | -2.0281 | 1.23E-17 | 0.7241379 | -2.0375 | 4.76E-39 | 0.759615385 | -2.095 | 5.74E-16 | 0.68 |
| ASAM       | 79827  | -2.4407 | 3.81E-17 | 0.7241379 | -2.6628 | 1.73E-30 | 0.788461538 | -2.246 | 7.20E-14 | 0.76 |
| PKNOX2     | 63876  | -2.4068 | 8.86E-17 | 0.7241379 | -2.3114 | 9.76E-22 | 0.634615385 | NA     | NA       | NA   |
| ST6GALNAC1 | 55808  | -2.7015 | 1.33E-16 | 0.7241379 | -3.4872 | 5.05E-34 | 0.788461538 | -2.144 | 1.56E-09 | 0.64 |
| KLHL13     | 90293  | -2.8274 | 1.59E-16 | 0.7241379 | -2.7858 | 2.29E-28 | 0.769230769 | -2.831 | 2.13E-12 | 0.64 |
| NGFR       | 4804   | -2.8653 | 2.78E-16 | 0.7241379 | -3.0222 | 9.43E-27 | 0.711538462 | -2.507 | 3.15E-11 | 0.6  |
| PPP1R3C    | 5507   | -2.2507 | 3.57E-15 | 0.7241379 | -3.0031 | 4.28E-35 | 0.846153846 | -2.494 | 3.02E-16 | 0.72 |
| KCNMA1     | 3778   | -2.1174 | 6.78E-15 | 0.7241379 | -2.5349 | 1.42E-29 | 0.730769231 | -2.006 | 2.08E-11 | 0.6  |
| FAM189A2   | 9413   | -2.4046 | 8.59E-15 | 0.7241379 | -2.8212 | 3.27E-27 | 0.701923077 | -2.888 | 7.65E-15 | 0.72 |
| CSRNP1     | 64651  | -2.0341 | 1.15E-14 | 0.7241379 | -2.2144 | 1.44E-37 | 0.798076923 | NA     | NA       | NA   |
| KCNK3      | 3777   | -2.5246 | 1.51E-14 | 0.7241379 | NA      | NA       | NA          | NA     | NA       | NA   |
| C10orf108  | 414235 | -2.2615 | 2.87E-14 | 0.7241379 | -2.2912 | 8.91E-21 | 0.644230769 | -2.352 | 1.40E-15 | 0.76 |
| TF         | 7018   | -2.9902 | 2.90E-14 | 0.7241379 | -2.8663 | 1.04E-17 | 0.701923077 | -3.449 | 8.60E-16 | 0.72 |
| IL6ST      | 3572   | -2.679  | 3.69E-14 | 0.7241379 | -3.5128 | 1.30E-30 | 0.769230769 | -3.334 | 4.10E-17 | 0.72 |
| LOC339524  | 339524 | -2.2585 | 5.00E-14 | 0.7241379 | -2.4071 | 3.28E-30 | 0.817307692 | -2.149 | 1.09E-11 | 0.72 |
| KCNB1      | 3745   | -2.8577 | 8.68E-14 | 0.7241379 | -3.7586 | 1.89E-35 | 0.846153846 | -3.165 | 1.46E-14 | 0.76 |
| CALN1      | 83698  | -2.4094 | 3.80E-13 | 0.7241379 | -2.9997 | 1.13E-25 | 0.865384615 | -3.546 | 4.84E-25 | 0.92 |
| SLC26A4    | 5172   | -2.1459 | 7.08E-13 | 0.7241379 | -2.1177 | 4.83E-21 | 0.653846154 | -2.406 | 2.64E-13 | 0.68 |
| CACNA2D1   | 781    | -3.0047 | 8.75E-13 | 0.7241379 | -3.6186 | 2.33E-27 | 0.807692308 | -4.286 | 1.57E-19 | 0.96 |
| CBLN1      | 869    | -2.5955 | 1.75E-12 | 0.7241379 | -2.8598 | 3.27E-26 | 0.759615385 | -2.005 | 2.77E-07 | 0.6  |
| PAR5       | 8123   | -2.6391 | 2.22E-12 | 0.7241379 | -3.2735 | 5.71E-29 | 0.826923077 | -2.77  | 1.59E-11 | 0.76 |
| GPR77      | 27202  | -2.0596 | 2.93E-12 | 0.7241379 | NA      | NA       | NA          | NA     | NA       | NA   |

|            |           |         |             |           |         |          |             |        |             |      |
|------------|-----------|---------|-------------|-----------|---------|----------|-------------|--------|-------------|------|
| C10orf93   | 255352    | -2.1134 | 4.78E-12    | 0.7241379 | -2.0781 | 6.53E-20 | 0.740384615 | -2.107 | 2.95E-11    | 0.72 |
| GREM2      | 64388     | -2.3168 | 7.35E-12    | 0.7241379 | -4.1227 | 2.38E-46 | 0.894230769 | -3.387 | 1.08E-17    | 0.8  |
| ANKK1      | 255239    | -2.3788 | 1.24E-11    | 0.7241379 | -2.1236 | 4.24E-21 | 0.673076923 | NA     | NA          | NA   |
| PCDHA10    | 56139     | -2.3762 | 5.45E-11    | 0.7241379 | -2.379  | 8.93E-15 | 0.653846154 | -2.326 | 1.67E-07    | 0.64 |
| IL20RA     | 53832     | -2.6235 | 6.50E-11    | 0.7241379 | -3.1013 | 4.82E-27 | 0.788461538 | -2.674 | 9.07E-09    | 0.64 |
| NCRNA00093 | 100188954 | -2.1177 | 1.76E-10    | 0.7241379 | -2.6365 | 2.84E-29 | 0.807692308 | -2.087 | 8.36E-09    | 0.6  |
| FLRT3      | 23767     | -2.474  | 3.11E-10    | 0.7241379 | -2.9952 | 5.83E-22 | 0.701923077 | NA     | NA          | NA   |
| SCN2A      | 6326      | -2.4291 | 6.03E-10    | 0.7241379 | -2.5157 | 1.80E-15 | 0.692307692 | -2.941 | 7.50E-11    | 0.72 |
| NPY1R      | 4886      | -2.6139 | 1.92E-09    | 0.7241379 | -3.1855 | 3.07E-22 | 0.740384615 | -3.229 | 3.90E-10    | 0.6  |
| KIT        | 3815      | -2.3969 | 3.71E-09    | 0.7241379 | -2.7391 | 1.02E-21 | 0.75        | -2.706 | 4.20E-09    | 0.76 |
| CACNA1G    | 8913      | -2.2258 | 5.85E-09    | 0.7241379 | -2.6922 | 6.10E-22 | 0.826923077 | -2.195 | 7.83E-08    | 0.88 |
| NAT8L      | 339983    | -2.2942 | 2.12E-08    | 0.7241379 | -2.7087 | 2.51E-22 | 0.778846154 | -2.771 | 6.66E-10    | 0.8  |
| PLD5       | 200150    | -2.0892 | 4.04E-08    | 0.7241379 | -2.8871 | 2.18E-25 | 0.759615385 | -2.771 | 5.24E-13    | 0.76 |
| ACTG2      | 72        | -2.6101 | 5.47E-08    | 0.7241379 | -2.3896 | 5.46E-11 | 0.615384615 | -3.035 | 1.29E-08    | 0.6  |
| CAPN8      | 388743    | -3.0346 | 8.13E-07    | 0.7241379 | -4.3713 | 6.51E-27 | 0.913461538 | -2.752 | 1.79E-05    | 0.72 |
| TMEM84     | 283673    | -2.1546 | 2.32E-06    | 0.7241379 | -2.5247 | 1.71E-16 | 0.75        | NA     | NA          | NA   |
| C1orf168   | 199920    | -2.3065 | 3.36E-06    | 0.7241379 | -2.9218 | 9.11E-20 | 0.855769231 | -2.727 | 6.65E-07    | 0.76 |
| HS3ST4     | 9951      | -2.6066 | 4.53E-06    | 0.7241379 | -3.6925 | 9.55E-21 | 0.807692308 | -3.638 | 6.45E-09    | 0.8  |
| C20orf114  | 92747     | -2.6392 | 2.66E-05    | 0.7241379 | -2.6836 | 7.91E-10 | 0.759615385 | NA     | NA          | NA   |
| SLC44A4    | 80736     | -2.0273 | 0.000124836 | 0.7241379 | -2.7908 | 3.20E-13 | 0.692307692 | NA     | NA          | NA   |
| C4BPA      | 722       | -2.195  | 0.000288559 | 0.7241379 | -3.1387 | 1.86E-14 | 0.788461538 | -2.877 | 4.31E-06    | 0.8  |
| SLCO1A2    | 6579      | -2.122  | 0.000843078 | 0.7241379 | -2.5232 | 3.06E-10 | 0.807692308 | -2.745 | 2.67E-05    | 0.8  |
| FOXA1      | 3169      | -2.1416 | 0.001560165 | 0.7241379 | -2.8032 | 3.03E-11 | 0.759615385 | NA     | NA          | NA   |
| KRT14      | 3861      | -2.0697 | 0.004378714 | 0.7241379 | -2.6248 | 7.10E-08 | 0.75        | -2.34  | 0.006155861 | 0.6  |
| PARK2      | 5071      | -2.3347 | 3.88E-40    | 0.6896552 | -2.8609 | 2.15E-59 | 0.778846154 | -2.42  | 2.57E-29    | 0.64 |
| FLRT2      | 23768     | -2.4778 | 7.85E-31    | 0.6896552 | -2.8757 | 1.02E-38 | 0.721153846 | -2.083 | 7.20E-15    | 0.56 |
| TXNIP      | 10628     | -2.2651 | 4.25E-29    | 0.6896552 | -2.7222 | 5.82E-60 | 0.817307692 | -2.249 | 4.25E-24    | 0.68 |
| ITM2A      | 9452      | -2.6123 | 4.61E-29    | 0.6896552 | -3.2817 | 1.52E-47 | 0.807692308 | -2.873 | 3.20E-28    | 0.76 |
| EFEMP1     | 2202      | -2.7908 | 5.98E-29    | 0.6896552 | -2.8421 | 5.33E-35 | 0.730769231 | -2.328 | 1.25E-19    | 0.6  |

|          |        |         |          |           |         |          |             |        |          |      |
|----------|--------|---------|----------|-----------|---------|----------|-------------|--------|----------|------|
| CYBRD1   | 79901  | -2.3265 | 4.35E-27 | 0.6896552 | -3.148  | 1.14E-67 | 0.875       | -2.605 | 4.36E-28 | 0.76 |
| SOCS2    | 8835   | -2.4001 | 1.25E-25 | 0.6896552 | -2.7925 | 3.54E-49 | 0.769230769 | -2.073 | 9.13E-20 | 0.64 |
| DBX2     | 440097 | -2.9933 | 2.35E-25 | 0.6896552 | -3.4377 | 3.58E-50 | 0.865384615 | -3.224 | 2.32E-23 | 0.84 |
| FGF1     | 2246   | -2.4513 | 5.80E-24 | 0.6896552 | -3.2335 | 3.67E-54 | 0.846153846 | -2.804 | 1.06E-24 | 0.76 |
| GPR116   | 221395 | -2.2184 | 2.40E-22 | 0.6896552 | -2.3746 | 2.98E-43 | 0.740384615 | NA     | NA       | NA   |
| GNAL     | 2774   | -2.3206 | 7.20E-22 | 0.6896552 | -2.9063 | 1.47E-37 | 0.721153846 | -2.652 | 9.71E-20 | 0.68 |
| MEG3     | 55384  | -2.5091 | 8.43E-22 | 0.6896552 | -3.0437 | 2.72E-32 | 0.769230769 | -2.482 | 1.44E-15 | 0.68 |
| GCNT4    | 51301  | -2.5866 | 1.18E-21 | 0.6896552 | -3.2157 | 6.69E-44 | 0.836538462 | -2.575 | 5.27E-19 | 0.64 |
| FMOD     | 2331   | -2.2487 | 2.82E-21 | 0.6896552 | -2.6232 | 1.77E-35 | 0.740384615 | -2.503 | 1.27E-21 | 0.8  |
| TLL1     | 7092   | -2.5322 | 1.08E-20 | 0.6896552 | -2.9929 | 2.82E-37 | 0.75        | -2.002 | 1.46E-09 | 0.48 |
| ASXL3    | 80816  | -2.6583 | 3.15E-20 | 0.6896552 | -3.0031 | 2.90E-31 | 0.759615385 | -3.155 | 5.54E-19 | 0.76 |
| RIMBP2   | 23504  | -2.5084 | 2.33E-19 | 0.6896552 | -3.076  | 1.92E-38 | 0.826923077 | -2.967 | 3.02E-24 | 0.72 |
| BTG2     | 7832   | -2.0117 | 5.46E-19 | 0.6896552 | -2.3135 | 3.29E-41 | 0.711538462 | NA     | NA       | NA   |
| PID1     | 55022  | -2.3854 | 1.41E-18 | 0.6896552 | -2.4547 | 6.67E-34 | 0.75        | -2.502 | 1.20E-17 | 0.72 |
| PLA2G16  | 11145  | -2.2796 | 3.14E-17 | 0.6896552 | -2.5713 | 2.90E-31 | 0.730769231 | -2.388 | 1.79E-15 | 0.72 |
| SLC22A3  | 6581   | -2.6147 | 1.95E-16 | 0.6896552 | -3.1847 | 3.42E-35 | 0.817307692 | -2.861 | 1.15E-15 | 0.64 |
| ODZ1     | 10178  | -2.152  | 2.24E-15 | 0.6896552 | -2.8241 | 9.90E-26 | 0.721153846 | -2.263 | 3.41E-10 | 0.6  |
| SEMA5A   | 9037   | -2.2159 | 5.04E-15 | 0.6896552 | -2.8862 | 3.12E-35 | 0.740384615 | -2.476 | 5.38E-14 | 0.76 |
| LIN7A    | 8825   | -2.3559 | 1.23E-14 | 0.6896552 | -3.3826 | 3.77E-41 | 0.846153846 | -2.876 | 2.44E-18 | 0.76 |
| SERPINA5 | 5104   | -3.1332 | 1.32E-14 | 0.6896552 | -3.6958 | 1.96E-28 | 0.769230769 | -3.408 | 7.06E-18 | 0.68 |
| KCNA6    | 3742   | -2.1072 | 1.74E-12 | 0.6896552 | -2.6537 | 7.44E-23 | 0.711538462 | -3.314 | 3.88E-21 | 0.76 |
| PACRG    | 135138 | -2.127  | 2.17E-12 | 0.6896552 | -2.3297 | 2.46E-24 | 0.711538462 | -2.495 | 3.73E-13 | 0.56 |
| RBM24    | 221662 | -2.3076 | 3.47E-12 | 0.6896552 | -2.3913 | 1.95E-21 | 0.778846154 | -2.603 | 5.16E-14 | 0.84 |
| APOD     | 347    | -2.7226 | 3.88E-12 | 0.6896552 | -4.6362 | 8.10E-37 | 0.875       | -3.635 | 1.49E-15 | 0.64 |
| SORCS1   | 114815 | -2.6235 | 4.24E-11 | 0.6896552 | -3.2743 | 1.39E-20 | 0.759615385 | -3.689 | 3.28E-18 | 0.84 |
| C14orf49 | 161176 | -2.1422 | 4.63E-11 | 0.6896552 | -2.4916 | 5.44E-29 | 0.846153846 | -2.2   | 7.05E-11 | 0.76 |
| D4S234E  | 27065  | -2.4654 | 1.07E-10 | 0.6896552 | -3.0372 | 5.72E-22 | 0.75        | -2.905 | 4.29E-12 | 0.68 |
| FMO5     | 2330   | -2.0645 | 1.30E-10 | 0.6896552 | -3.1989 | 8.54E-39 | 0.875       | -2.202 | 7.38E-10 | 0.72 |
| RANBP3L  | 202151 | -2.549  | 2.53E-10 | 0.6896552 | -3.6303 | 2.30E-31 | 0.798076923 | -3.38  | 1.48E-13 | 0.8  |

|             |           |         |          |           |         |          |             |        |          |      |
|-------------|-----------|---------|----------|-----------|---------|----------|-------------|--------|----------|------|
| IGSF9B      | 22997     | -2.2443 | 4.89E-10 | 0.6896552 | -2.7702 | 3.92E-24 | 0.75        | -3.119 | 2.10E-14 | 0.68 |
| CSRNP3      | 80034     | -2.5054 | 6.48E-10 | 0.6896552 | -2.6277 | 3.70E-20 | 0.788461538 | -3.099 | 1.10E-12 | 0.88 |
| CEBPA       | 1050      | -2.0506 | 6.76E-09 | 0.6896552 | -2.0364 | 1.19E-20 | 0.740384615 | NA     | NA       | NA   |
| ELOVL2      | 54898     | -2.0442 | 1.12E-08 | 0.6896552 | -2.4353 | 2.60E-18 | 0.721153846 | NA     | NA       | NA   |
| LOC10018894 | 100188947 | -2.1696 | 4.45E-08 | 0.6896552 | -2.8192 | 2.56E-27 | 0.836538462 | -2.04  | 2.57E-06 | 0.76 |
| CLCA2       | 9635      | -2.5832 | 5.94E-06 | 0.6896552 | -3.8299 | 3.05E-17 | 0.798076923 | NA     | NA       | NA   |
| AQP1        | 358       | -2.6043 | 5.93E-36 | 0.6551724 | -2.9136 | 5.89E-48 | 0.721153846 | -2.312 | 4.03E-24 | 0.68 |
| THRB        | 7068      | -2.3971 | 3.19E-33 | 0.6551724 | -3.2029 | 4.35E-57 | 0.836538462 | -2.642 | 1.88E-27 | 0.6  |
| C4orf32     | 132720    | -2.3905 | 7.10E-32 | 0.6551724 | -2.5441 | 1.68E-49 | 0.740384615 | NA     | NA       | NA   |
| SEPP1       | 6414      | -2.6985 | 1.52E-31 | 0.6551724 | -3.1789 | 2.33E-56 | 0.788461538 | -2.532 | 1.29E-22 | 0.56 |
| C21orf34    | 388815    | -2.6309 | 3.78E-31 | 0.6551724 | -3.2879 | 3.69E-56 | 0.807692308 | -2.639 | 1.48E-23 | 0.68 |
| EDNRB       | 1910      | -2.7732 | 4.63E-30 | 0.6551724 | -3.0423 | 1.94E-45 | 0.798076923 | -2.706 | 1.57E-22 | 0.72 |
| ARHGAP6     | 395       | -2.253  | 6.49E-30 | 0.6551724 | -2.5464 | 3.63E-48 | 0.721153846 | NA     | NA       | NA   |
| SEMA3C      | 10512     | -2.9017 | 2.01E-28 | 0.6551724 | -3.108  | 2.67E-44 | 0.759615385 | -2.131 | 3.27E-18 | 0.56 |
| TENC1       | 23371     | -2.0769 | 1.82E-27 | 0.6551724 | -2.6313 | 1.25E-66 | 0.817307692 | -2.317 | 3.43E-25 | 0.72 |
| DST         | 667       | -2.8554 | 2.16E-27 | 0.6551724 | -2.9804 | 4.41E-55 | 0.884615385 | -2.671 | 6.88E-22 | 0.68 |
| SH3D19      | 152503    | -2.2841 | 4.88E-27 | 0.6551724 | -2.5981 | 8.46E-55 | 0.798076923 | -2.465 | 7.77E-26 | 0.76 |
| PNPLA7      | 375775    | -2.245  | 8.63E-27 | 0.6551724 | -2.8771 | 3.53E-44 | 0.759615385 | -2.206 | 1.69E-24 | 0.6  |
| FAM13A      | 10144     | -2.1503 | 1.31E-24 | 0.6551724 | -2.2964 | 3.80E-60 | 0.826923077 | -2.285 | 3.91E-24 | 0.64 |
| MRGPRF      | 116535    | -2.4087 | 1.92E-24 | 0.6551724 | -2.8671 | 5.94E-47 | 0.778846154 | -2.296 | 5.81E-20 | 0.72 |
| RUNX1T1     | 862       | -2.6911 | 9.23E-24 | 0.6551724 | -3.6288 | 1.80E-45 | 0.855769231 | -3.171 | 2.60E-23 | 0.8  |
| SLC40A1     | 30061     | -2.2628 | 9.57E-24 | 0.6551724 | -2.8686 | 1.17E-41 | 0.740384615 | -2.054 | 1.46E-14 | 0.48 |
| CPEB1       | 64506     | -2.4604 | 1.86E-23 | 0.6551724 | -3.1707 | 1.40E-40 | 0.778846154 | -2.956 | 1.28E-22 | 0.72 |
| CCDC48      | 79825     | -2.1677 | 4.16E-23 | 0.6551724 | -2.6066 | 7.86E-37 | 0.730769231 | NA     | NA       | NA   |
| LGI4        | 163175    | -2.3728 | 3.55E-22 | 0.6551724 | -2.7364 | 2.43E-42 | 0.778846154 | -2.319 | 1.65E-18 | 0.72 |
| RSPO3       | 84870     | -2.2311 | 7.75E-20 | 0.6551724 | -2.755  | 6.96E-36 | 0.769230769 | -2.362 | 5.70E-15 | 0.68 |
| GRRP1       | 79927     | -2.1661 | 2.05E-19 | 0.6551724 | -2.6637 | 4.59E-46 | 0.826923077 | NA     | NA       | NA   |
| PCDHGA3     | 56112     | -2.3114 | 2.78E-19 | 0.6551724 | -2.9852 | 1.98E-42 | 0.817307692 | -2.367 | 8.41E-19 | 0.68 |
| CDH23       | 64072     | -2.4747 | 5.45E-19 | 0.6551724 | -2.8044 | 1.17E-34 | 0.778846154 | -2.174 | 1.15E-13 | 0.68 |

|            |           |         |             |           |         |          |             |        |             |      |
|------------|-----------|---------|-------------|-----------|---------|----------|-------------|--------|-------------|------|
| KCND3      | 3752      | -3.1009 | 6.57E-17    | 0.6551724 | -4.0067 | 2.62E-45 | 0.865384615 | -2.929 | 1.06E-13    | 0.72 |
| KLF2       | 10365     | -2.0061 | 1.65E-16    | 0.6551724 | -2.2806 | 2.13E-37 | 0.721153846 | NA     | NA          | NA   |
| STEAP4     | 79689     | -2.3713 | 3.63E-16    | 0.6551724 | -3.4789 | 2.11E-43 | 0.817307692 | -2.307 | 2.02E-16    | 0.72 |
| AFF3       | 3899      | -2.6859 | 1.14E-15    | 0.6551724 | -3.8972 | 5.35E-39 | 0.817307692 | -3.632 | 5.47E-18    | 0.76 |
| C7         | 730       | -3.6137 | 1.37E-14    | 0.6551724 | -4.8417 | 7.93E-31 | 0.826923077 | -3.163 | 1.86E-11    | 0.76 |
| DNAH6      | 1768      | -2.3277 | 5.59E-14    | 0.6551724 | -2.4748 | 1.07E-30 | 0.701923077 | -3.09  | 1.63E-18    | 0.72 |
| PRRG3      | 79057     | -2.2578 | 1.00E-13    | 0.6551724 | -2.7461 | 2.44E-29 | 0.75        | -3.21  | 1.84E-23    | 0.84 |
| ZNF385B    | 151126    | -2.4001 | 1.88E-13    | 0.6551724 | -2.6725 | 4.71E-27 | 0.759615385 | -2.433 | 1.47E-09    | 0.68 |
| SIGLECP3   | 284367    | -2.1594 | 2.25E-13    | 0.6551724 | -2.6915 | 1.86E-34 | 0.826923077 | -2.268 | 2.81E-12    | 0.68 |
| FCER1A     | 2205      | -2.143  | 6.17E-13    | 0.6551724 | -3.2044 | 1.44E-29 | 0.730769231 | -2.08  | 2.90E-11    | 0.56 |
| WDR86      | 349136    | -2.2714 | 2.45E-12    | 0.6551724 | -2.4569 | 5.92E-25 | 0.730769231 | NA     | NA          | NA   |
| MAPK10     | 5602      | -2.4176 | 2.13E-11    | 0.6551724 | -2.989  | 1.54E-24 | 0.730769231 | -2.261 | 1.17E-09    | 0.68 |
| MS4A2      | 2206      | -2.4875 | 5.74E-11    | 0.6551724 | -3.2257 | 1.59E-30 | 0.778846154 | -2.136 | 8.86E-08    | 0.72 |
| SNORD116-4 | 100033416 | -2.6944 | 2.17E-10    | 0.6551724 | -3.281  | 1.44E-23 | 0.740384615 | -3.06  | 9.50E-11    | 0.64 |
| C1orf150   | 148823    | -2.2045 | 5.94E-10    | 0.6551724 | -2.588  | 2.87E-29 | 0.846153846 | -2.15  | 2.45E-08    | 0.72 |
| DDR2       | 4921      | -2.2047 | 7.49E-10    | 0.6551724 | -2.5005 | 1.32E-21 | 0.778846154 | -2.642 | 2.52E-12    | 0.84 |
| PDE1C      | 5137      | -2.6389 | 9.82E-10    | 0.6551724 | -2.9007 | 5.83E-23 | 0.721153846 | -3.269 | 2.17E-13    | 0.72 |
| VSIG2      | 23584     | -2.9812 | 1.44E-09    | 0.6551724 | -3.896  | 6.62E-27 | 0.788461538 | -2.648 | 1.02E-06    | 0.68 |
| CADM3      | 57863     | -2.3395 | 1.95E-09    | 0.6551724 | -3.8479 | 2.76E-32 | 0.807692308 | -3.141 | 1.24E-16    | 0.72 |
| MLPH       | 79083     | -2.2286 | 3.52E-09    | 0.6551724 | -3.1079 | 4.66E-25 | 0.817307692 | NA     | NA          | NA   |
| LOC643763  | 643763    | -2.0559 | 3.55E-09    | 0.6551724 | -2.6819 | 1.11E-24 | 0.817307692 | -2.626 | 3.34E-14    | 0.76 |
| TMC5       | 79838     | -2.6418 | 2.73E-07    | 0.6551724 | -3.3662 | 1.10E-17 | 0.759615385 | -2.144 | 0.000129701 | 0.56 |
| CRB2       | 286204    | -2.0074 | 1.02E-06    | 0.6551724 | -2.5719 | 5.01E-22 | 0.807692308 | -2.14  | 1.69E-06    | 0.64 |
| TFAP2B     | 7021      | -2.2077 | 0.003074672 | 0.6551724 | -3.8231 | 1.02E-14 | 0.836538462 | NA     | NA          | NA   |
| LRP2       | 4036      | -2.26   | 0.004783356 | 0.6551724 | -3.0387 | 8.99E-09 | 0.701923077 | -3.855 | 1.15E-05    | 0.8  |
| CXCL12     | 6387      | -2.3335 | 1.02E-28    | 0.6206897 | -2.862  | 1.44E-52 | 0.788461538 | -2.625 | 3.90E-25    | 0.68 |
| NDN        | 4692      | -2.2374 | 1.43E-28    | 0.6206897 | -2.7541 | 1.74E-44 | 0.75        | -2.139 | 1.14E-19    | 0.6  |
| RUNDC3B    | 154661    | -2.403  | 7.24E-27    | 0.6206897 | -2.9816 | 1.63E-50 | 0.788461538 | -2.594 | 6.63E-23    | 0.76 |
| PCDHGB6    | 56100     | -2.5481 | 1.44E-26    | 0.6206897 | -2.6837 | 6.67E-38 | 0.730769231 | -2.834 | 3.26E-28    | 0.84 |

|             |           |         |             |           |         |          |             |        |             |      |
|-------------|-----------|---------|-------------|-----------|---------|----------|-------------|--------|-------------|------|
| RGS5        | 8490      | -2.1938 | 2.58E-26    | 0.6206897 | -2.5362 | 7.20E-40 | 0.75        | NA     | NA          | NA   |
| NR5A2       | 2494      | -2.1066 | 2.67E-25    | 0.6206897 | -2.4026 | 4.76E-45 | 0.701923077 | NA     | NA          | NA   |
| C7orf63     | 79846     | -2.237  | 3.73E-25    | 0.6206897 | -2.7408 | 1.46E-53 | 0.769230769 | -2.722 | 1.15E-25    | 0.72 |
| PLSCR4      | 57088     | -2.1391 | 1.40E-24    | 0.6206897 | -2.9219 | 3.21E-60 | 0.846153846 | -2.89  | 2.42E-28    | 0.8  |
| EPAS1       | 2034      | -2.134  | 6.67E-23    | 0.6206897 | -2.3493 | 2.50E-48 | 0.721153846 | NA     | NA          | NA   |
| MAST4       | 375449    | -2.4305 | 8.54E-23    | 0.6206897 | -2.8272 | 1.39E-44 | 0.701923077 | -2.169 | 3.01E-20    | 0.6  |
| ATP1B2      | 482       | -2.0404 | 3.89E-22    | 0.6206897 | -2.561  | 1.52E-35 | 0.701923077 | -2.335 | 2.46E-17    | 0.64 |
| ROBO4       | 54538     | -2.0006 | 1.11E-21    | 0.6206897 | -2.2613 | 4.62E-47 | 0.701923077 | NA     | NA          | NA   |
| PLEKHH2     | 130271    | -2.1661 | 1.94E-21    | 0.6206897 | -2.9926 | 5.32E-43 | 0.75        | -2.834 | 9.67E-24    | 0.68 |
| DLG2        | 1740      | -2.0918 | 6.14E-21    | 0.6206897 | -2.6154 | 8.18E-34 | 0.701923077 | -2.059 | 3.42E-13    | 0.52 |
| TTC18       | 118491    | -2.1753 | 3.74E-19    | 0.6206897 | -2.5371 | 1.49E-39 | 0.711538462 | -2.54  | 3.12E-19    | 0.64 |
| PRDM16      | 63976     | -2.1531 | 3.78E-18    | 0.6206897 | -2.6617 | 1.04E-32 | 0.75        | -2.306 | 3.57E-17    | 0.6  |
| F3          | 2152      | -2.1939 | 1.06E-17    | 0.6206897 | -2.6969 | 2.82E-45 | 0.711538462 | NA     | NA          | NA   |
| ACER2       | 340485    | -2.2019 | 1.38E-17    | 0.6206897 | -2.7678 | 2.38E-44 | 0.769230769 | -2.306 | 2.68E-17    | 0.6  |
| KIAA1683    | 80726     | -2.3242 | 2.23E-17    | 0.6206897 | -2.9566 | 1.36E-39 | 0.721153846 | -2.502 | 3.24E-17    | 0.68 |
| C9orf68     | 55064     | -2.204  | 5.23E-17    | 0.6206897 | -2.5984 | 5.57E-33 | 0.75        | -2.244 | 2.02E-14    | 0.64 |
| MYLK        | 4638      | -2.2046 | 1.01E-16    | 0.6206897 | -2.541  | 2.45E-32 | 0.701923077 | -2.327 | 1.50E-16    | 0.68 |
| SCN11A      | 11280     | -2.1881 | 2.36E-16    | 0.6206897 | -2.784  | 9.15E-43 | 0.865384615 | -2.354 | 4.08E-18    | 0.64 |
| ABI3BP      | 25890     | -2.7258 | 3.24E-16    | 0.6206897 | -3.5395 | 3.98E-35 | 0.826923077 | -2.785 | 3.07E-14    | 0.72 |
| GPR34       | 2857      | -2.1165 | 1.54E-15    | 0.6206897 | -2.5317 | 5.25E-39 | 0.759615385 | NA     | NA          | NA   |
| OMD         | 4958      | -2.2957 | 3.41E-15    | 0.6206897 | -3.3895 | 7.42E-38 | 0.817307692 | -3.165 | 1.64E-17    | 0.8  |
| SNORD116-20 | 100033431 | -2.0779 | 3.46E-14    | 0.6206897 | -2.5582 | 2.27E-33 | 0.75        | -2.13  | 1.20E-13    | 0.52 |
| NCAM2       | 4685      | -2.0909 | 4.76E-13    | 0.6206897 | -2.6498 | 1.06E-28 | 0.730769231 | -2.53  | 1.17E-11    | 0.64 |
| HDC         | 3067      | -2.2395 | 1.90E-10    | 0.6206897 | -2.8799 | 3.02E-28 | 0.788461538 | -2.035 | 1.15E-08    | 0.68 |
| NPY5R       | 4889      | -2.6245 | 1.44E-09    | 0.6206897 | -3.1402 | 1.45E-22 | 0.721153846 | -3.004 | 5.34E-10    | 0.6  |
| THBS4       | 7060      | -2.3151 | 2.26E-09    | 0.6206897 | -2.6002 | 1.94E-16 | 0.730769231 | NA     | NA          | NA   |
| LMO3        | 55885     | -2.1858 | 4.83E-08    | 0.6206897 | -2.1667 | 7.95E-13 | 0.701923077 | -2.618 | 2.96E-09    | 0.76 |
| WNK4        | 65266     | -2.8082 | 3.78E-06    | 0.6206897 | -3.0287 | 1.27E-14 | 0.788461538 | -2.419 | 0.000113672 | 0.64 |
| WIF1        | 11197     | -2.6487 | 0.000421613 | 0.6206897 | -3.6589 | 1.15E-13 | 0.817307692 | -3.898 | 2.15E-07    | 0.88 |



|          |        |         |          |           |         |          |             |        |          |      |
|----------|--------|---------|----------|-----------|---------|----------|-------------|--------|----------|------|
| SPRY2    | 10253  | -2.118  | 8.50E-35 | 0.5862069 | -2.4388 | 4.05E-53 | 0.701923077 | -2.191 | 3.84E-28 | 0.64 |
| C16orf45 | 89927  | -2.1123 | 2.93E-30 | 0.5862069 | -2.6078 | 2.23E-55 | 0.75        | NA     | NA       | NA   |
| BCL2     | 596    | -2.3262 | 1.08E-29 | 0.5862069 | -2.6409 | 1.18E-48 | 0.75        | -2.598 | 5.79E-29 | 0.68 |
| NR3C2    | 4306   | -2.4232 | 3.19E-29 | 0.5862069 | -2.938  | 2.21E-56 | 0.769230769 | -2.67  | 2.56E-24 | 0.68 |
| KLHL29   | 114818 | -2.384  | 1.09E-27 | 0.5862069 | -2.6603 | 1.48E-45 | 0.730769231 | -2.487 | 1.96E-26 | 0.68 |
| C4orf12  | 404201 | -2.1682 | 5.08E-27 | 0.5862069 | -2.8951 | 5.55E-56 | 0.817307692 | -2.472 | 5.65E-29 | 0.68 |
| NXPH3    | 11248  | -2.2969 | 5.24E-26 | 0.5862069 | -2.6876 | 2.87E-40 | 0.711538462 | -2.468 | 8.28E-27 | 0.72 |
| FLJ36777 | 730971 | -2.0861 | 8.96E-26 | 0.5862069 | -2.3202 | 1.49E-44 | 0.711538462 | -2.064 | 3.36E-19 | 0.6  |
| ECSCR    | 641700 | -2.1224 | 2.10E-25 | 0.5862069 | -2.5007 | 2.12E-47 | 0.759615385 | NA     | NA       | NA   |
| EFHA2    | 286097 | -2.3844 | 3.32E-25 | 0.5862069 | -2.9311 | 6.08E-43 | 0.759615385 | -2.874 | 4.99E-27 | 0.84 |
| PRICKLE2 | 166336 | -2.1183 | 5.25E-25 | 0.5862069 | -2.7535 | 6.42E-51 | 0.759615385 | -2.11  | 3.37E-23 | 0.64 |
| GALNTL1  | 57452  | -2.4231 | 1.56E-21 | 0.5862069 | -3.1297 | 5.39E-37 | 0.701923077 | -2.232 | 5.33E-18 | 0.6  |
| FAT4     | 79633  | -2.3048 | 3.31E-21 | 0.5862069 | -2.8214 | 1.58E-35 | 0.730769231 | -2.591 | 1.88E-21 | 0.72 |
| ANGPTL2  | 23452  | -2.0335 | 3.40E-18 | 0.5862069 | -2.4072 | 2.66E-41 | 0.721153846 | -2.082 | 1.72E-17 | 0.68 |
| SELP     | 6403   | -2.7252 | 4.74E-16 | 0.5862069 | -3.7728 | 5.06E-34 | 0.778846154 | -2.472 | 2.65E-12 | 0.52 |
| CYP21A2  | 1589   | -2.2343 | 2.56E-15 | 0.5862069 | -2.4406 | 8.44E-23 | 0.701923077 | NA     | NA       | NA   |
| SEMA3D   | 223117 | -2.485  | 4.83E-15 | 0.5862069 | -3.4671 | 8.63E-35 | 0.759615385 | -3.413 | 1.64E-23 | 0.72 |
| DSCAML1  | 57453  | -2.2274 | 2.50E-14 | 0.5862069 | -2.4447 | 7.50E-29 | 0.75        | -2.609 | 5.45E-17 | 0.76 |
| INPP4B   | 8821   | -2.1708 | 8.43E-14 | 0.5862069 | -2.8719 | 2.58E-34 | 0.769230769 | -2.068 | 2.87E-10 | 0.56 |
| ZNF366   | 167465 | -2.0759 | 2.34E-13 | 0.5862069 | -2.6974 | 8.86E-34 | 0.711538462 | -2.473 | 1.53E-15 | 0.64 |
| GPR17    | 2840   | -2.2653 | 1.17E-12 | 0.5862069 | -2.7892 | 6.75E-30 | 0.778846154 | -2.666 | 6.21E-16 | 0.76 |
| FOXP2    | 93986  | -2.2447 | 1.58E-11 | 0.5862069 | -2.9883 | 1.93E-26 | 0.778846154 | -3.276 | 3.80E-17 | 0.84 |
| SHISA6   | 388336 | -2.1559 | 1.92E-11 | 0.5862069 | -2.8963 | 2.14E-33 | 0.798076923 | -2.603 | 5.68E-13 | 0.72 |
| ST8SIA6  | 338596 | -2.0626 | 1.34E-06 | 0.5862069 | -2.73   | 5.67E-20 | 0.721153846 | -3.156 | 9.27E-13 | 0.72 |
| CCL28    | 56477  | -2.1991 | 7.12E-06 | 0.5862069 | -3.3703 | 8.05E-21 | 0.807692308 | -3.094 | 9.55E-09 | 0.76 |
| THSD1    | 55901  | -2.1393 | 1.10E-40 | 0.5517241 | -2.4503 | 5.89E-63 | 0.701923077 | NA     | NA       | NA   |
| CBX7     | 23492  | -2.0195 | 5.09E-35 | 0.5517241 | -2.5624 | 2.86E-65 | 0.759615385 | -2.295 | 6.70E-32 | 0.72 |
| KLHDC1   | 122773 | -2.257  | 6.98E-34 | 0.5517241 | -2.7782 | 3.30E-67 | 0.75        | -2.25  | 2.92E-26 | 0.56 |
| PELI2    | 57161  | -2.1885 | 1.12E-29 | 0.5517241 | -2.5931 | 2.98E-38 | 0.740384615 | -2.282 | 8.53E-24 | 0.6  |

|         |           |         |          |           |         |          |             |        |             |      |
|---------|-----------|---------|----------|-----------|---------|----------|-------------|--------|-------------|------|
| ADCY4   | 196883    | -2.2154 | 2.23E-27 | 0.5517241 | -2.5462 | 4.96E-45 | 0.701923077 | NA     | NA          | NA   |
| ZCCHC24 | 219654    | -2.2369 | 2.23E-26 | 0.5517241 | -2.6627 | 1.39E-53 | 0.778846154 | -2.019 | 1.45E-19    | 0.64 |
| LRRC17  | 10234     | -2.0087 | 2.31E-14 | 0.5517241 | -2.7868 | 4.39E-33 | 0.75        | NA     | NA          | NA   |
| DYNLRB2 | 83657     | -2.1913 | 3.16E-12 | 0.5517241 | -2.8806 | 1.26E-31 | 0.798076923 | -2.326 | 1.22E-10    | 0.6  |
| CPA3    | 1359      | -2.4981 | 6.64E-09 | 0.5517241 | -3.1295 | 2.84E-23 | 0.730769231 | -2.125 | 3.26E-06    | 0.56 |
| CCL21   | 6366      | -2.4263 | 3.31E-08 | 0.5517241 | -4.4958 | 4.20E-28 | 0.817307692 | -3.163 | 4.17E-11    | 0.64 |
| MSRB3   | 253827    | -2.1388 | 9.03E-31 | 0.5172414 | -2.8266 | 2.88E-55 | 0.769230769 | -2.47  | 6.30E-31    | 0.8  |
| CCDC152 | 100129792 | -2.0151 | 1.45E-24 | 0.5172414 | -2.6038 | 3.63E-48 | 0.711538462 | -2.018 | 1.27E-19    | 0.52 |
| PDE1A   | 5136      | -2.0683 | 1.24E-22 | 0.5172414 | -2.6075 | 1.44E-41 | 0.721153846 | NA     | NA          | NA   |
| PLA2R1  | 22925     | -2.068  | 1.44E-18 | 0.4827586 | -2.4154 | 3.89E-36 | 0.701923077 | -2.189 | 4.26E-21    | 0.6  |
| NR2F1   | 7025      | -2.1008 | 5.55E-17 | 0.4827586 | -2.9107 | 2.59E-33 | 0.701923077 | NA     | NA          | NA   |
| ISM1    | 140862    | -2.1647 | 1.22E-14 | 0.4827586 | -3.347  | 9.80E-42 | 0.769230769 | -2.851 | 7.55E-20    | 0.72 |
| VIPR1   | 7433      | -2.2079 | 1.74E-20 | 0.4482759 | -2.7169 | 1.38E-39 | 0.721153846 | NA     | NA          | NA   |
| LDB3    | 11155     | NA      | NA       | NA        | -2.3242 | 3.41E-29 | 1           | -2.076 | 1.66E-09    | 1    |
| MYL3    | 4634      | NA      | NA       | NA        | -2.3152 | 3.02E-21 | 1           | -2.069 | 4.83E-07    | 1    |
| SULT1C3 | 442038    | NA      | NA       | NA        | -2.0031 | 6.02E-07 | 0.990384615 | NA     | NA          | NA   |
| NLRP13  | 126204    | NA      | NA       | NA        | -2.0354 | 1.59E-21 | 0.971153846 | NA     | NA          | NA   |
| MYOM3   | 127294    | NA      | NA       | NA        | -2.2698 | 2.73E-21 | 0.961538462 | NA     | NA          | NA   |
| NLRP8   | 126205    | NA      | NA       | NA        | -2.0535 | 2.68E-24 | 0.951923077 | NA     | NA          | NA   |
| HSD3B2  | 3284      | NA      | NA       | NA        | -2.491  | 9.17E-11 | 0.951923077 | NA     | NA          | NA   |
| GLP2R   | 9340      | NA      | NA       | NA        | -2.5571 | 6.10E-20 | 0.942307692 | -2.607 | 1.71E-07    | 1    |
| CHRNA2  | 1135      | NA      | NA       | NA        | -2.111  | 3.85E-13 | 0.942307692 | NA     | NA          | NA   |
| ACSM1   | 116285    | NA      | NA       | NA        | -2.4223 | 7.25E-10 | 0.942307692 | NA     | NA          | NA   |
| MYBPC1  | 4604      | NA      | NA       | NA        | -3.1243 | 9.66E-09 | 0.932692308 | -3.566 | 0.000112029 | 0.92 |
| CLEC3A  | 10143     | NA      | NA       | NA        | -2.3205 | 5.49E-08 | 0.932692308 | NA     | NA          | NA   |
| SERHL2  | 253190    | NA      | NA       | NA        | -2.2768 | 8.07E-12 | 0.923076923 | NA     | NA          | NA   |
| MUC7    | 4589      | NA      | NA       | NA        | -2.1356 | 2.72E-07 | 0.923076923 | NA     | NA          | NA   |
| PRKAR2B | 5577      | NA      | NA       | NA        | -2.5932 | 2.74E-28 | 0.913461538 | -2.614 | 1.56E-10    | 0.88 |
| LRRC31  | 79782     | NA      | NA       | NA        | -2.6341 | 2.38E-15 | 0.913461538 | NA     | NA          | NA   |

|          |        |    |    |    |         |          |             |        |          |      |
|----------|--------|----|----|----|---------|----------|-------------|--------|----------|------|
| ALOX15B  | 247    | NA | NA | NA | -2.0918 | 1.11E-06 | 0.913461538 | NA     | NA       | NA   |
| SMR3B    | 10879  | NA | NA | NA | -2.4325 | 1.06E-07 | 0.903846154 | NA     | NA       | NA   |
| UNC13C   | 440279 | NA | NA | NA | -2.4791 | 3.01E-32 | 0.894230769 | -2.394 | 1.65E-13 | 0.8  |
| APOF     | 319    | NA | NA | NA | -2.1184 | 1.50E-21 | 0.894230769 | NA     | NA       | NA   |
| AMBP     | 259    | NA | NA | NA | -2.1182 | 7.59E-15 | 0.894230769 | NA     | NA       | NA   |
| CYP4F8   | 11283  | NA | NA | NA | -2.8982 | 1.49E-11 | 0.894230769 | NA     | NA       | NA   |
| DHRS2    | 10202  | NA | NA | NA | -2.7482 | 9.29E-09 | 0.884615385 | NA     | NA       | NA   |
| DCD      | 117159 | NA | NA | NA | -2.148  | 1.51E-07 | 0.875       | NA     | NA       | NA   |
| HPGD     | 3248   | NA | NA | NA | -2.5622 | 4.15E-16 | 0.865384615 | -2.032 | 4.54E-05 | 0.8  |
| SPINK8   | 646424 | NA | NA | NA | -2.2624 | 1.67E-09 | 0.865384615 | NA     | NA       | NA   |
| KCTD4    | 386618 | NA | NA | NA | -2.0948 | 8.81E-26 | 0.855769231 | -2.455 | 2.87E-14 | 0.8  |
| SCGB2A1  | 4246   | NA | NA | NA | -3.1227 | 9.79E-13 | 0.855769231 | NA     | NA       | NA   |
| ACSL1    | 2180   | NA | NA | NA | -2.2431 | 1.05E-25 | 0.846153846 | NA     | NA       | NA   |
| KIAA0087 | 9808   | NA | NA | NA | -2.4885 | 1.61E-44 | 0.836538462 | -2.397 | 1.87E-16 | 0.8  |
| IQUB     | 154865 | NA | NA | NA | -2.514  | 6.83E-34 | 0.836538462 | -2.425 | 6.21E-13 | 0.76 |
| ITIH3    | 3699   | NA | NA | NA | -2.6267 | 2.35E-30 | 0.836538462 | NA     | NA       | NA   |
| CCDC141  | 285025 | NA | NA | NA | -2.2293 | 2.64E-25 | 0.836538462 | -2.069 | 1.32E-09 | 0.8  |
| HPX      | 3263   | NA | NA | NA | -2.2492 | 1.37E-15 | 0.836538462 | NA     | NA       | NA   |
| SPAG6    | 9576   | NA | NA | NA | -2.1621 | 1.08E-12 | 0.836538462 | -2.587 | 9.34E-07 | 0.84 |
| ATP1A4   | 480    | NA | NA | NA | -2.3344 | 1.52E-19 | 0.826923077 | NA     | NA       | NA   |
| AQP4     | 361    | NA | NA | NA | -2.1965 | 1.82E-12 | 0.826923077 | -2.036 | 1.33E-05 | 0.76 |
| RETSAT   | 54884  | NA | NA | NA | -2.0275 | 3.20E-34 | 0.817307692 | NA     | NA       | NA   |
| CUX2     | 23316  | NA | NA | NA | -2.3221 | 4.15E-12 | 0.817307692 | NA     | NA       | NA   |
| NEGR1    | 257194 | NA | NA | NA | -2.8155 | 7.85E-32 | 0.807692308 | -2.691 | 3.70E-14 | 0.72 |
| APOLD1   | 81575  | NA | NA | NA | -2.1415 | 2.46E-27 | 0.807692308 | NA     | NA       | NA   |
| TEPP     | 374739 | NA | NA | NA | -2.2399 | 1.79E-19 | 0.807692308 | NA     | NA       | NA   |
| FGFBP2   | 83888  | NA | NA | NA | -2.5261 | 5.28E-15 | 0.807692308 | -2.66  | 1.77E-07 | 0.72 |
| CX3CR1   | 1524   | NA | NA | NA | -3.1143 | 3.86E-37 | 0.798076923 | -2.734 | 3.13E-16 | 0.76 |
| SPATA4   | 132851 | NA | NA | NA | -2.1587 | 4.27E-29 | 0.798076923 | -2.107 | 4.44E-11 | 0.8  |

|              |           |    |    |    |         |          |             |        |             |      |
|--------------|-----------|----|----|----|---------|----------|-------------|--------|-------------|------|
| EYS          | 346007    | NA | NA | NA | -2.1364 | 5.75E-25 | 0.798076923 | -2.176 | 1.41E-09    | 0.88 |
| SPAG17       | 200162    | NA | NA | NA | -2.5084 | 2.74E-22 | 0.798076923 | -2.115 | 2.73E-08    | 0.64 |
| KERA         | 11081     | NA | NA | NA | -2.366  | 3.20E-17 | 0.798076923 | -2.013 | 1.06E-06    | 0.64 |
| CDR1         | 1038      | NA | NA | NA | -2.2525 | 5.41E-14 | 0.798076923 | -2.964 | 2.83E-09    | 0.92 |
| PLA2G2A      | 5320      | NA | NA | NA | -2.7333 | 2.74E-09 | 0.798076923 | NA     | NA          | NA   |
| TNN          | 63923     | NA | NA | NA | -3.5724 | 2.97E-35 | 0.788461538 | -3.141 | 2.84E-17    | 0.72 |
| PNPLA2       | 57104     | NA | NA | NA | -2.1209 | 1.81E-34 | 0.788461538 | NA     | NA          | NA   |
| CAB39L       | 81617     | NA | NA | NA | -2.6652 | 3.72E-59 | 0.778846154 | NA     | NA          | NA   |
| LOC100126784 | 100126784 | NA | NA | NA | -2.5585 | 5.32E-30 | 0.778846154 | -2.321 | 7.40E-12    | 0.64 |
| STK32A       | 202374    | NA | NA | NA | -2.4441 | 8.82E-24 | 0.778846154 | -2.706 | 1.28E-15    | 0.88 |
| MFAP5        | 8076      | NA | NA | NA | -2.4652 | 6.08E-18 | 0.778846154 | -2.304 | 2.45E-07    | 0.76 |
| RASL10A      | 10633     | NA | NA | NA | -2.1127 | 9.52E-18 | 0.778846154 | NA     | NA          | NA   |
| HSD11B1      | 3290      | NA | NA | NA | -2.0405 | 7.33E-16 | 0.778846154 | NA     | NA          | NA   |
| PODN         | 127435    | NA | NA | NA | -2.7166 | 7.63E-31 | 0.769230769 | NA     | NA          | NA   |
| MSTN         | 2660      | NA | NA | NA | -2.3794 | 4.94E-29 | 0.769230769 | -2.736 | 2.04E-25    | 0.84 |
| LOC100192378 | 100192378 | NA | NA | NA | -2.3119 | 2.66E-23 | 0.769230769 | -2.083 | 2.04E-10    | 0.72 |
| DNAH5        | 1767      | NA | NA | NA | -2.3841 | 6.64E-17 | 0.769230769 | -2.373 | 5.88E-06    | 0.64 |
| HSPA12B      | 116835    | NA | NA | NA | -2.3105 | 5.16E-43 | 0.759615385 | NA     | NA          | NA   |
| PCDHGA5      | 56110     | NA | NA | NA | -2.7175 | 6.89E-36 | 0.759615385 | -2.176 | 3.44E-15    | 0.68 |
| CYTL1        | 54360     | NA | NA | NA | -2.4906 | 1.07E-27 | 0.759615385 | NA     | NA          | NA   |
| TWIST2       | 117581    | NA | NA | NA | -2.2409 | 1.93E-24 | 0.759615385 | -2.097 | 9.82E-10    | 0.64 |
| KCNMB2       | 10242     | NA | NA | NA | -2.1699 | 2.04E-20 | 0.759615385 | NA     | NA          | NA   |
| FAT3         | 120114    | NA | NA | NA | -2.2434 | 7.90E-18 | 0.759615385 | -2.137 | 2.18E-09    | 0.72 |
| PM20D1       | 148811    | NA | NA | NA | -2.0391 | 1.39E-17 | 0.759615385 | NA     | NA          | NA   |
| DBC1         | 1620      | NA | NA | NA | -3.2455 | 9.20E-17 | 0.759615385 | -2.132 | 0.000370422 | 0.56 |
| MRGPRX3      | 117195    | NA | NA | NA | -2.4559 | 1.25E-13 | 0.759615385 | -2.495 | 6.10E-06    | 0.8  |
| TMEM45B      | 120224    | NA | NA | NA | -2.3367 | 3.83E-11 | 0.759615385 | NA     | NA          | NA   |
| ATP13A4      | 84239     | NA | NA | NA | -2.3341 | 1.16E-09 | 0.759615385 | NA     | NA          | NA   |
| HGD          | 3081      | NA | NA | NA | -2.2471 | 8.59E-09 | 0.759615385 | NA     | NA          | NA   |

|             |        |    |    |    |         |          |             |        |          |      |
|-------------|--------|----|----|----|---------|----------|-------------|--------|----------|------|
| CLDN8       | 9073   | NA | NA | NA | -2.456  | 1.29E-08 | 0.759615385 | NA     | NA       | NA   |
| LOC257358   | 257358 | NA | NA | NA | -2.0329 | 5.78E-36 | 0.75        | NA     | NA       | NA   |
| ACSS3       | 79611  | NA | NA | NA | -2.6737 | 1.46E-28 | 0.75        | -2.871 | 2.19E-15 | 0.72 |
| CNTN1       | 1272   | NA | NA | NA | -3.3182 | 1.41E-26 | 0.75        | -3.012 | 1.14E-11 | 0.64 |
| SNTG2       | 54221  | NA | NA | NA | -2.873  | 3.29E-25 | 0.75        | -2.8   | 2.12E-12 | 0.68 |
| CDK15       | 65061  | NA | NA | NA | -2.1858 | 4.34E-24 | 0.75        | NA     | NA       | NA   |
| FMN2        | 56776  | NA | NA | NA | -2.4585 | 1.90E-22 | 0.75        | -2.065 | 2.45E-10 | 0.68 |
| GLB1L3      | 112937 | NA | NA | NA | -2.0028 | 2.40E-15 | 0.75        | NA     | NA       | NA   |
| KRT32       | 3882   | NA | NA | NA | -2.0393 | 1.43E-13 | 0.75        | NA     | NA       | NA   |
| CNRIP1      | 25927  | NA | NA | NA | -2.3232 | 8.44E-42 | 0.740384615 | NA     | NA       | NA   |
| DTX1        | 1840   | NA | NA | NA | -2.1705 | 6.94E-32 | 0.740384615 | -2.082 | 5.18E-13 | 0.68 |
| CXCR2       | 3579   | NA | NA | NA | -2.0364 | 1.35E-22 | 0.740384615 | NA     | NA       | NA   |
| ADAMTS8     | 11095  | NA | NA | NA | -2.438  | 2.78E-19 | 0.740384615 | NA     | NA       | NA   |
| C9orf152    | 401546 | NA | NA | NA | -2.5918 | 3.48E-11 | 0.740384615 | NA     | NA       | NA   |
| HP          | 3240   | NA | NA | NA | -2.0808 | 4.05E-08 | 0.740384615 | NA     | NA       | NA   |
| FLJ13197    | 79667  | NA | NA | NA | -2.5141 | 2.61E-39 | 0.730769231 | -2.534 | 8.18E-19 | 0.68 |
| HYAL1       | 3373   | NA | NA | NA | -2.2907 | 2.73E-34 | 0.730769231 | NA     | NA       | NA   |
| RIC3        | 79608  | NA | NA | NA | -2.8401 | 1.25E-27 | 0.730769231 | -3.118 | 3.20E-16 | 0.6  |
| DNAH7       | 56171  | NA | NA | NA | -2.5768 | 9.07E-26 | 0.730769231 | -2.61  | 1.36E-11 | 0.72 |
| WNT9B       | 7484   | NA | NA | NA | -2.0633 | 1.21E-25 | 0.730769231 | NA     | NA       | NA   |
| NRK         | 203447 | NA | NA | NA | -2.6463 | 2.55E-25 | 0.730769231 | NA     | NA       | NA   |
| SLC38A4     | 55089  | NA | NA | NA | -2.2529 | 5.69E-20 | 0.730769231 | NA     | NA       | NA   |
| STON1-GTF2A | 286749 | NA | NA | NA | -2.3152 | 5.29E-11 | 0.730769231 | -2.709 | 7.14E-06 | 0.8  |
| DSG1        | 1828   | NA | NA | NA | -2.2122 | 1.34E-07 | 0.730769231 | NA     | NA       | NA   |
| BCL8        | 606    | NA | NA | NA | -2.2743 | 2.74E-35 | 0.721153846 | NA     | NA       | NA   |
| ANO5        | 203859 | NA | NA | NA | -2.6656 | 6.54E-25 | 0.721153846 | -3.37  | 2.74E-23 | 0.8  |
| INPP5J      | 27124  | NA | NA | NA | -2.0815 | 2.39E-16 | 0.721153846 | NA     | NA       | NA   |
| VWCE        | 220001 | NA | NA | NA | -2.1964 | 1.23E-29 | 0.711538462 | NA     | NA       | NA   |
| PDLIM3      | 27295  | NA | NA | NA | -2.1717 | 5.48E-27 | 0.711538462 | NA     | NA       | NA   |

|              |           |         |             |           |         |          |             |        |             |      |
|--------------|-----------|---------|-------------|-----------|---------|----------|-------------|--------|-------------|------|
| C14orf50     | 145376    | NA      | NA          | NA        | -2.2953 | 1.88E-26 | 0.711538462 | -2.255 | 1.50E-14    | 0.68 |
| ANGPT1       | 284       | NA      | NA          | NA        | -2.2213 | 1.06E-20 | 0.711538462 | -2.229 | 4.13E-10    | 0.72 |
| CDH8         | 1006      | NA      | NA          | NA        | -2.012  | 3.05E-14 | 0.711538462 | -2.293 | 3.39E-08    | 0.84 |
| KLF9         | 687       | NA      | NA          | NA        | -2.3346 | 2.13E-52 | 0.701923077 | NA     | NA          | NA   |
| IRS1         | 3667      | NA      | NA          | NA        | -2.6571 | 1.36E-46 | 0.701923077 | -2.235 | 6.36E-20    | 0.6  |
| ELTD1        | 64123     | NA      | NA          | NA        | -2.2859 | 2.84E-42 | 0.701923077 | NA     | NA          | NA   |
| CYP46A1      | 10858     | NA      | NA          | NA        | -2.2501 | 2.88E-39 | 0.701923077 | NA     | NA          | NA   |
| DLC1         | 10395     | NA      | NA          | NA        | -2.3911 | 1.60E-38 | 0.701923077 | -2.036 | 2.96E-15    | 0.6  |
| BAALC        | 79870     | NA      | NA          | NA        | -2.3177 | 1.14E-28 | 0.701923077 | NA     | NA          | NA   |
| DOCK11       | 139818    | NA      | NA          | NA        | -2.0027 | 1.99E-22 | 0.701923077 | NA     | NA          | NA   |
| F13A1        | 2162      | NA      | NA          | NA        | -2.4005 | 7.70E-19 | 0.701923077 | NA     | NA          | NA   |
| TCEAL2       | 140597    | NA      | NA          | NA        | -2.4325 | 1.08E-14 | 0.701923077 | -2.908 | 1.67E-12    | 0.6  |
| RNF39        | 80352     | NA      | NA          | NA        | -2.0302 | 3.61E-13 | 0.701923077 | NA     | NA          | NA   |
| RASSF6       | 166824    | NA      | NA          | NA        | -2.1731 | 3.15E-12 | 0.701923077 | -2.156 | 0.000113232 | 0.72 |
| ENPP3        | 5169      | NA      | NA          | NA        | -2.2315 | 8.58E-11 | 0.701923077 | NA     | NA          | NA   |
| TMEM35       | 59353     | -2.2761 | 1.88E-14    | 0.6896552 | -2.4609 | 9.74E-17 | 0.625       | -2.745 | 1.53E-16    | 0.72 |
| LOC100124697 | 100124692 | -2.0042 | 0.001744032 | 0.6896552 | NA      | NA       | NA          | -3.285 | 1.92E-06    | 0.88 |
| USP44        | 84101     | -2.3294 | 3.38E-20    | 0.6551724 | -2.8544 | 9.96E-34 | 0.682692308 | -2.537 | 2.58E-18    | 0.72 |
| STXBP6       | 29091     | -2.3773 | 1.07E-17    | 0.6551724 | NA      | NA       | NA          | -2.738 | 7.59E-16    | 0.72 |
| ZNF483       | 158399    | -2.3162 | 2.40E-16    | 0.6551724 | -2.359  | 4.20E-32 | 0.653846154 | -2.624 | 4.97E-17    | 0.72 |
| GSTM2        | 2946      | -2.0753 | 3.97E-14    | 0.6551724 | -2.2005 | 2.14E-24 | 0.576923077 | -2.515 | 1.75E-21    | 0.72 |
| ZSCAN23      | 222696    | -2.3246 | 1.49E-10    | 0.6551724 | -2.5912 | 2.07E-22 | 0.682692308 | -2.84  | 2.27E-15    | 0.72 |
| C1orf190     | 541468    | -2.2871 | 1.85E-30    | 0.6206897 | -2.4171 | 2.61E-46 | 0.663461538 | -2.181 | 2.46E-24    | 0.72 |
| BMP4         | 652       | -2.39   | 1.66E-28    | 0.6206897 | -2.9599 | 1.21E-46 | 0.682692308 | -2.422 | 5.60E-21    | 0.76 |
| NBLA00301    | 79804     | -2.1925 | 1.24E-22    | 0.6206897 | -2.3842 | 5.41E-29 | 0.644230769 | -3.275 | 2.17E-26    | 0.84 |
| ZDBF2        | 57683     | -2.0703 | 1.40E-16    | 0.6206897 | NA      | NA       | NA          | -2.411 | 2.76E-22    | 0.72 |
| EDA2R        | 60401     | -2.1733 | 4.26E-21    | 0.5862069 | -2.6336 | 3.05E-41 | 0.673076923 | -2.404 | 4.97E-19    | 0.72 |
| DYNC2H1      | 79659     | -2.0429 | 2.19E-19    | 0.5172414 | -2.1688 | 1.10E-35 | 0.576923077 | -2.631 | 5.96E-27    | 0.76 |
| RNF150       | 57484     | -2.1233 | 4.84E-10    | 0.5172414 | -2.1199 | 2.50E-19 | 0.605769231 | -3.096 | 1.73E-20    | 0.8  |

|           |        |    |    |    |         |          |             |        |          |      |
|-----------|--------|----|----|----|---------|----------|-------------|--------|----------|------|
| CSMD1     | 64478  | NA | NA | NA | -2.1841 | 3.18E-11 | 0.682692308 | -2.683 | 9.27E-10 | 0.84 |
| PROX1     | 5629   | NA | NA | NA | -2.3912 | 2.57E-17 | 0.673076923 | -2.473 | 2.24E-11 | 0.8  |
| MPPED2    | 744    | NA | NA | NA | -2.4855 | 1.11E-21 | 0.653846154 | -2.761 | 9.78E-20 | 0.72 |
| CASC1     | 55259  | NA | NA | NA | -2.1379 | 4.00E-20 | 0.653846154 | -2.127 | 6.98E-10 | 0.72 |
| NTF3      | 4908   | NA | NA | NA | -2.1646 | 5.43E-17 | 0.653846154 | -2.753 | 9.69E-16 | 0.76 |
| DMRTC1B   | 728656 | NA | NA | NA | -2.1366 | 4.82E-15 | 0.644230769 | -2.344 | 5.23E-08 | 0.8  |
| PAK3      | 5063   | NA | NA | NA | -2.1648 | 1.38E-16 | 0.634615385 | -3.169 | 1.07E-14 | 0.8  |
| NTRK3     | 4916   | NA | NA | NA | -2.6325 | 5.17E-18 | 0.625       | -3.197 | 1.65E-17 | 0.72 |
| ATRNL1    | 26033  | NA | NA | NA | -2.0432 | 3.00E-12 | 0.625       | -2.723 | 7.38E-11 | 0.8  |
| GRIA3     | 2892   | NA | NA | NA | -2.3349 | 4.60E-24 | 0.615384615 | -2.731 | 2.46E-17 | 0.76 |
| MUM1L1    | 139221 | NA | NA | NA | -2.5586 | 8.73E-22 | 0.615384615 | -2.291 | 1.03E-12 | 0.72 |
| CCDC8     | 83987  | NA | NA | NA | -2.1453 | 6.23E-17 | 0.596153846 | -2.474 | 1.94E-11 | 0.76 |
| S100B     | 6285   | NA | NA | NA | -2.2377 | 2.95E-15 | 0.557692308 | -2.835 | 4.36E-16 | 0.84 |
| MCCD1     | 401250 | NA | NA | NA | NA      | NA       | NA          | -2.115 | 1.27E-06 | 0.96 |
| GRIN2B    | 2904   | NA | NA | NA | NA      | NA       | NA          | -2.575 | 1.08E-13 | 0.92 |
| ABCB11    | 8647   | NA | NA | NA | NA      | NA       | NA          | -2.095 | 3.29E-07 | 0.92 |
| CLCN1     | 1180   | NA | NA | NA | NA      | NA       | NA          | -2.047 | 1.10E-09 | 0.88 |
| LOC93432  | 93432  | NA | NA | NA | NA      | NA       | NA          | -2.461 | 3.25E-05 | 0.88 |
| DDX25     | 29118  | NA | NA | NA | NA      | NA       | NA          | -2.101 | 2.70E-11 | 0.84 |
| RORB      | 6096   | NA | NA | NA | NA      | NA       | NA          | -2.371 | 6.60E-08 | 0.84 |
| SIM1      | 6492   | NA | NA | NA | NA      | NA       | NA          | -2.592 | 2.52E-06 | 0.84 |
| EPHA6     | 285220 | NA | NA | NA | NA      | NA       | NA          | -2.093 | 3.67E-12 | 0.8  |
| PMP2      | 5375   | NA | NA | NA | NA      | NA       | NA          | -2.086 | 6.57E-08 | 0.8  |
| PAX3      | 5077   | NA | NA | NA | NA      | NA       | NA          | -2.046 | 3.24E-07 | 0.8  |
| CLDN2     | 9075   | NA | NA | NA | NA      | NA       | NA          | -2.147 | 1.11E-08 | 0.76 |
| CDH19     | 28513  | NA | NA | NA | NA      | NA       | NA          | -2.262 | 1.98E-07 | 0.76 |
| KIF5A     | 3798   | NA | NA | NA | NA      | NA       | NA          | -2.546 | 6.39E-07 | 0.76 |
| LOC643719 | 643719 | NA | NA | NA | NA      | NA       | NA          | -2.063 | 1.03E-06 | 0.76 |
| CLDN10    | 9071   | NA | NA | NA | NA      | NA       | NA          | -2.086 | 7.86E-05 | 0.76 |

|         |        |    |    |    |    |    |    |        |            |      |
|---------|--------|----|----|----|----|----|----|--------|------------|------|
| ?       | 652919 | NA | NA | NA | NA | NA | NA | -2.473 | 0.00074098 | 0.76 |
| DAAM2   | 23500  | NA | NA | NA | NA | NA | NA | -2.215 | 1.49E-18   | 0.72 |
| OSR1    | 130497 | NA | NA | NA | NA | NA | NA | -2.632 | 1.39E-13   | 0.72 |
| PCDH11X | 27328  | NA | NA | NA | NA | NA | NA | -2.699 | 1.87E-13   | 0.72 |
| WBSCR17 | 64409  | NA | NA | NA | NA | NA | NA | -2.091 | 1.66E-11   | 0.72 |
| RGS11   | 8786   | NA | NA | NA | NA | NA | NA | -2.257 | 4.27E-11   | 0.72 |
| MKX     | 283078 | NA | NA | NA | NA | NA | NA | -2.3   | 3.19E-09   | 0.72 |
| KIF5C   | 3800   | NA | NA | NA | NA | NA | NA | -2.045 | 3.18E-08   | 0.72 |
| SLC6A15 | 55117  | NA | NA | NA | NA | NA | NA | -2.341 | 5.62E-08   | 0.72 |
| KCNH8   | 131096 | NA | NA | NA | NA | NA | NA | -2.622 | 9.43E-08   | 0.72 |
| DCX     | 1641   | NA | NA | NA | NA | NA | NA | -2.37  | 1.18E-05   | 0.72 |



Supplementary Table 3a. Up regulated genes in 70% of overall patients

| Up regulated genes |        | Stagel |          |           | Stagell |          |           | Stagelll |          |           | StagelV |          |           |
|--------------------|--------|--------|----------|-----------|---------|----------|-----------|----------|----------|-----------|---------|----------|-----------|
| GeneName           | GeneID | FC     | FDR      | frequency | FC      | FDR      | frequency | FC       | FDR      | frequency | FC      | FDR      | frequency |
| COL10A1            | 1300   | 7.0108 | 7.5E-104 | 0.9617486 | 6.7293  | 1.7E-133 | 0.9550562 | 6.9749   | 1.2E-115 | 0.9642857 | 7.22    | 7.28E-40 | 1         |
| MMP11              | 4320   | 5.9094 | 3.6E-101 | 0.9562842 | 5.7306  | 4.2E-144 | 0.9518459 | 5.9607   | 1.7E-110 | 0.9484127 | 6.4081  | 5.40E-46 | 1         |
| IBSP               | 3381   | 5.188  | 8.36E-72 | 0.9398907 | 4.9775  | 1.01E-86 | 0.929374  | 4.532    | 2.25E-60 | 0.8968254 | 4.5361  | 6.86E-33 | 0.95      |
| COL11A1            | 1301   | 6.0578 | 1.37E-66 | 0.8852459 | 6.0138  | 1.45E-94 | 0.8876404 | 5.6999   | 1.86E-61 | 0.8452381 | 6.2155  | 2.06E-24 | 0.9       |
| PPAPDC1A           | 196051 | 5.3893 | 1.33E-72 | 0.8797814 | 5.2062  | 8.2E-110 | 0.8539326 | 5.395    | 4.58E-84 | 0.8769841 | 5.755   | 4.58E-27 | 0.85      |
| NEK2               | 4751   | 4.2875 | 2.62E-71 | 0.8688525 | 4.7871  | 5.6E-164 | 0.9341894 | 4.6036   | 7.82E-90 | 0.8888889 | 4.7642  | 7.12E-22 | 0.9       |
| KIF4A              | 24137  | 3.9983 | 6.1E-68  | 0.8469945 | 4.4924  | 4.3E-144 | 0.9069021 | 4.2867   | 2.19E-84 | 0.8531746 | 4.5004  | 4.05E-22 | 0.9       |
| PKMYT1             | 9088   | 4.3479 | 2.91E-66 | 0.8415301 | 4.7549  | 4E-145   | 0.9101124 | 4.6512   | 1.07E-84 | 0.8809524 | 4.8181  | 9.87E-19 | 0.9       |
| CCL11              | 6356   | 3.8973 | 1.76E-56 | 0.8415301 | 3.5689  | 8.05E-77 | 0.8282504 | 3.6646   | 3.34E-66 | 0.8452381 | 3.0266  | 6.97E-20 | 0.85      |
| CST4               | 1472   | 4.4024 | 9.95E-38 | 0.8360656 | 4.0355  | 5.24E-40 | 0.776886  | 4.1458   | 6.65E-41 | 0.7896825 | 3.9748  | 5.24E-23 | 0.9       |
| LOC283867          | 283867 | 3.5183 | 3.27E-55 | 0.8306011 | 3.1431  | 8.15E-59 | 0.7624398 | 3.5041   | 8.6E-63  | 0.8888889 | 3.0088  | 3.48E-20 | 0.75      |
| MMP13              | 4322   | 6.3392 | 1.01E-62 | 0.8196721 | 6.1997  | 3.74E-94 | 0.8330658 | 5.9266   | 2.04E-59 | 0.7777778 | 5.5327  | 1.73E-18 | 0.85      |
| GJB2               | 2706   | 3.9487 | 1.14E-53 | 0.8196721 | 3.7813  | 2.45E-71 | 0.7849117 | 3.5903   | 9.22E-51 | 0.7579365 | 4.0812  | 3.96E-24 | 0.85      |
| CST1               | 1469   | 6.7906 | 7.4E-58  | 0.7978142 | 6.1852  | 1.44E-63 | 0.741573  | 6.097    | 2.35E-50 | 0.7142857 | 6.4704  | 1.98E-24 | 0.85      |
| CHRNA6             | 8973   | 3.3536 | 1.22E-52 | 0.7978142 | 2.8616  | 5.1E-49  | 0.6966292 | 2.9648   | 4.83E-44 | 0.7103175 | 2.2157  | 1.84E-10 | 0.55      |
| KIAA0101           | 9768   | 3.4215 | 1.71E-63 | 0.7923497 | 3.6645  | 3.7E-134 | 0.847512  | 3.6065   | 2.48E-77 | 0.8253968 | 3.343   | 1.08E-15 | 0.8       |
| CDC25C             | 995    | 3.681  | 1.26E-61 | 0.7923497 | 4.0954  | 1.1E-137 | 0.8860353 | 3.9458   | 1.97E-74 | 0.8333333 | 3.836   | 1.13E-17 | 0.85      |
| COMP               | 1311   | 4.9131 | 9.94E-57 | 0.7923497 | 4.6839  | 7.93E-67 | 0.7897271 | 5.018    | 1.2E-70  | 0.8412698 | 5.3806  | 7.73E-18 | 0.9       |
| UBE2C              | 11065  | 3.8471 | 1.98E-60 | 0.7868852 | 4.3677  | 1.7E-123 | 0.8651685 | 4.2296   | 2.85E-76 | 0.8293651 | 4.4257  | 1.81E-21 | 0.85      |
| SLC24A2            | 25769  | 3.7599 | 3.34E-47 | 0.7868852 | 3.3417  | 4.82E-48 | 0.7399679 | 3.7166   | 6.3E-52  | 0.7936508 | 3.2911  | 5.87E-19 | 0.7       |
| HSD17B6            | 8630   | 2.9981 | 1.46E-69 | 0.7759563 | 2.9923  | 1.9E-109 | 0.7752809 | 3.0441   | 2.91E-79 | 0.7738095 | 3.1367  | 1.46E-22 | 0.7       |
| GABRD              | 2563   | 3.3314 | 8.86E-68 | 0.7759563 | 3.3708  | 8.6E-102 | 0.7784912 | 3.5661   | 3.33E-89 | 0.8452381 | 3.7349  | 2.91E-25 | 0.9       |
| UHRF1              | 29128  | 3.517  | 1.15E-60 | 0.7759563 | 3.8534  | 1.3E-128 | 0.8218299 | 3.677    | 7.15E-72 | 0.8055556 | 3.525   | 8.89E-15 | 0.75      |
| PLAC1              | 10761  | 3.4124 | 1.55E-45 | 0.7759563 | 3.6356  | 5.03E-63 | 0.7817014 | 3.6258   | 9.25E-61 | 0.8253968 | 3.8489  | 1.13E-23 | 0.9       |
| IQGAP3             | 128239 | 3.6539 | 1.06E-61 | 0.7704918 | 4.1742  | 1.3E-135 | 0.8892456 | 3.9635   | 2.07E-79 | 0.8373016 | 3.8176  | 1.06E-18 | 0.75      |
| HAGHL              | 84264  | 3.705  | 7.52E-56 | 0.7704918 | 3.6691  | 2.28E-88 | 0.7977528 | 3.8547   | 5.2E-70  | 0.8253968 | 4.0194  | 6.56E-20 | 0.85      |
| PROC               | 5624   | 2.8988 | 3.67E-56 | 0.7650273 | 2.616   | 4.65E-65 | 0.6548957 | 2.6238   | 2.09E-52 | 0.6944444 | 2.5637  | 1.72E-15 | 0.7       |
| EPYC               | 1833   | 4.3669 | 1.31E-42 | 0.7650273 | 4.2798  | 1.58E-51 | 0.7447833 | 3.8781   | 2.85E-35 | 0.6746032 | 3.9705  | 1.05E-20 | 0.75      |
| LRRC15             | 131578 | 3.5897 | 2.82E-44 | 0.7595628 | 3.4235  | 1.25E-57 | 0.7094703 | 3.4974   | 1.65E-48 | 0.734127  | 3.6855  | 1.89E-15 | 0.75      |
| WISP1              | 8840   | 3.4254 | 4.99E-58 | 0.7540984 | 3.2086  | 1.06E-79 | 0.7191011 | 3.3937   | 1.02E-66 | 0.781746  | 3.1736  | 2.12E-19 | 0.7       |

|          |        |        |          |           |        |          |           |        |          |           |        |          |      |
|----------|--------|--------|----------|-----------|--------|----------|-----------|--------|----------|-----------|--------|----------|------|
| MELK     | 9833   | 3.5404 | 2.23E-55 | 0.7486339 | 4.0269 | 5.9E-113 | 0.8266453 | 3.7694 | 1.01E-69 | 0.7777778 | 3.8765 | 1.69E-18 | 0.85 |
| CST2     | 1470   | 4.1664 | 5.99E-47 | 0.7486339 | 3.557  | 5.9E-40  | 0.6597111 | 4.1957 | 2.77E-51 | 0.781746  | 3.4976 | 5.76E-15 | 0.65 |
| NUF2     | 83540  | 3.6044 | 7.42E-63 | 0.7431694 | 4.105  | 7.8E-126 | 0.8699839 | 3.8403 | 4.03E-78 | 0.8293651 | 3.9091 | 6.39E-22 | 0.8  |
| SCT      | 6343   | 2.9578 | 6.03E-44 | 0.7377049 | 2.8547 | 1.01E-52 | 0.7239165 | 2.9813 | 8.51E-45 | 0.7103175 | 3.727  | 4.40E-33 | 0.95 |
| PITX1    | 5307   | 4.0009 | 1.44E-34 | 0.726776  | 4.1574 | 2.29E-59 | 0.7431782 | 4.5536 | 7.66E-64 | 0.8055556 | 4.5456 | 1.38E-16 | 0.8  |
| CILP2    | 148113 | 3.0655 | 9.01E-56 | 0.7213115 | 2.9239 | 1.74E-64 | 0.6773676 | 3.1375 | 7.47E-57 | 0.7261905 | 2.9634 | 2.09E-20 | 0.7  |
| SPC24    | 147841 | 2.9659 | 2.58E-50 | 0.7213115 | 3.4491 | 6.41E-94 | 0.7961477 | 3.2569 | 2.49E-62 | 0.7460317 | 3.528  | 4.57E-22 | 0.85 |
| MMP1     | 4312   | 5.0812 | 5.87E-43 | 0.7213115 | 5.412  | 7.97E-65 | 0.7287319 | 5.0486 | 7.17E-43 | 0.6666667 | 5.8872 | 1.14E-20 | 0.7  |
| TROAP    | 10024  | 3.4835 | 1.22E-56 | 0.715847  | 3.9976 | 2.7E-119 | 0.8346709 | 3.8712 | 6.27E-75 | 0.8253968 | 4.0159 | 7.51E-21 | 0.85 |
| ADAMTS14 | 140766 | 3.5688 | 2.11E-54 | 0.715847  | 3.4343 | 2.49E-96 | 0.6757624 | 3.4081 | 4.38E-60 | 0.6825397 | 3.7818 | 6.70E-18 | 0.7  |
| TDO2     | 6999   | 3.8047 | 1.53E-52 | 0.715847  | 3.8951 | 6.81E-74 | 0.7094703 | 3.6845 | 4.63E-50 | 0.6428571 | 4.4552 | 2.09E-21 | 0.85 |
| PLK1     | 5347   | 3.1171 | 2.36E-59 | 0.7103825 | 3.6349 | 6.9E-115 | 0.8154093 | 3.4465 | 1.29E-72 | 0.797619  | 3.7036 | 4.40E-24 | 0.8  |
| KIF20A   | 10112  | 3.515  | 1.14E-55 | 0.7103825 | 3.9111 | 5.1E-122 | 0.8170144 | 3.7218 | 1.09E-66 | 0.7777778 | 3.793  | 5.28E-17 | 0.75 |
| WBCSR28  | 135886 | 2.4543 | 1.17E-32 | 0.7103825 | 2.4124 | 1.57E-41 | 0.7303371 | 2.3185 | 1.04E-36 | 0.7460317 | 3.0337 | 4.13E-24 | 0.8  |
| TPX2     | 22974  | 3.0468 | 1.01E-60 | 0.704918  | 3.5743 | 2.7E-120 | 0.8218299 | 3.3431 | 1.57E-74 | 0.7936508 | 3.3581 | 3.63E-24 | 0.85 |
| SPC25    | 57405  | 3.0119 | 2.6E-60  | 0.704918  | 3.4023 | 8.5E-130 | 0.8346709 | 3.2262 | 9.68E-77 | 0.797619  | 3.2002 | 1.43E-17 | 0.85 |
| OR2B6    | 26212  | 2.1441 | 3.58E-30 | 0.704918  | 2.426  | 1.64E-46 | 0.7865169 | 2.2888 | 7.01E-36 | 0.7222222 | 2.457  | 1.08E-18 | 0.8  |
| HJURP    | 55355  | 3.315  | 6.95E-60 | 0.6994536 | 3.747  | 1.6E-121 | 0.8314607 | 3.5342 | 8.8E-73  | 0.7936508 | 3.4138 | 5.57E-19 | 0.8  |
| PBK      | 55872  | 3.2549 | 6.11E-53 | 0.6721311 | 3.8287 | 5.3E-118 | 0.8282504 | 3.6466 | 1.36E-67 | 0.7698413 | 3.8066 | 6.79E-17 | 0.85 |
| DLGAP5   | 9787   | 3.4285 | 3.54E-53 | 0.6721311 | 3.9114 | 4.9E-120 | 0.8202247 | 3.7007 | 1.48E-65 | 0.765873  | 3.6621 | 1.70E-15 | 0.8  |
| CEP55    | 55165  | 3.0932 | 1.69E-56 | 0.6830601 | 3.5839 | 1.4E-113 | 0.8105939 | 3.2671 | 2.77E-68 | 0.7380952 | 3.3504 | 3.24E-19 | 0.8  |
| BUB1     | 699    | 3.165  | 5.88E-53 | 0.6612022 | 3.704  | 1.6E-115 | 0.8073836 | 3.436  | 1.79E-68 | 0.7777778 | 3.5556 | 3.59E-19 | 0.8  |
| ASPM     | 259266 | 3.449  | 1.1E-50  | 0.6557377 | 3.9325 | 6.6E-111 | 0.8073836 | 3.6557 | 4.72E-62 | 0.7857143 | 3.3676 | 1.10E-13 | 0.65 |
| EXO1     | 9156   | 3.2152 | 6.37E-51 | 0.6229508 | 3.8052 | 3.3E-107 | 0.8073836 | 3.5553 | 7.3E-66  | 0.781746  | 3.5052 | 3.78E-16 | 0.75 |
| UBE2T    | 29089  | 2.7813 | 7.19E-63 | 0.6721311 | 3.2724 | 1.4E-124 | 0.8057785 | 3.0928 | 7.29E-78 | 0.7738095 | 3.2962 | 3.82E-26 | 0.75 |
| NEIL3    | 55247  | 3.2468 | 4.7E-51  | 0.6775956 | 3.7542 | 6.1E-107 | 0.8057785 | 3.5783 | 4.8E-65  | 0.7738095 | 3.3768 | 9.68E-16 | 0.8  |
| KIF18B   | 146909 | 3.4873 | 8.28E-54 | 0.6994536 | 3.9651 | 1.5E-112 | 0.8025682 | 3.6843 | 6.15E-66 | 0.7619048 | 3.6931 | 4.57E-16 | 0.75 |
| ASF1B    | 55723  | 2.8066 | 1.74E-60 | 0.6612022 | 3.1451 | 1.6E-126 | 0.8009631 | 2.9425 | 1.82E-74 | 0.7380952 | 2.9792 | 3.99E-19 | 0.8  |
| HMMR     | 3161   | 3.1319 | 6.35E-56 | 0.6666667 | 3.5401 | 8.1E-122 | 0.7961477 | 3.3303 | 7.3E-66  | 0.7539683 | 3.223  | 5.85E-16 | 0.7  |
| KIF2C    | 11004  | 3.1211 | 3.16E-54 | 0.6721311 | 3.6176 | 5.7E-107 | 0.7945425 | 3.3701 | 4.5E-67  | 0.7579365 | 3.4924 | 5.43E-18 | 0.75 |
| DTL      | 51514  | 2.7969 | 3.42E-51 | 0.6065574 | 3.2013 | 1.8E-115 | 0.7913323 | 3.0443 | 2.48E-67 | 0.7301587 | 3.0002 | 1.82E-16 | 0.7  |
| NDC80    | 10403  | 3.0938 | 3.19E-56 | 0.6721311 | 3.5195 | 2E-108   | 0.7913323 | 3.2336 | 2.58E-65 | 0.7380952 | 3.3569 | 1.72E-18 | 0.75 |
| CDK1     | 983    | 2.7341 | 1.26E-62 | 0.6284153 | 3.1779 | 2E-119   | 0.7849117 | 2.9497 | 2.45E-67 | 0.734127  | 3.0024 | 2.57E-23 | 0.75 |

|           |        |        |          |           |        |          |           |        |          |           |        |          |      |
|-----------|--------|--------|----------|-----------|--------|----------|-----------|--------|----------|-----------|--------|----------|------|
| KIF14     | 9928   | 3.2537 | 3.56E-48 | 0.6174863 | 3.8661 | 9E-102   | 0.7849117 | 3.6106 | 1.65E-61 | 0.7460317 | 3.5222 | 1.35E-16 | 0.75 |
| FOXM1     | 2305   | 3.0491 | 2.59E-53 | 0.6174863 | 3.617  | 2.6E-101 | 0.7849117 | 3.3321 | 3.36E-68 | 0.7460317 | 3.5012 | 1.79E-20 | 0.7  |
| RRM2      | 6241   | 3.164  | 4.08E-53 | 0.6721311 | 3.6824 | 1.3E-113 | 0.7817014 | 3.4929 | 1.62E-63 | 0.7380952 | 3.5346 | 3.24E-16 | 0.75 |
| ANLN      | 54443  | 2.9976 | 1.74E-51 | 0.6393443 | 3.4649 | 3.7E-102 | 0.776886  | 3.2817 | 6.21E-60 | 0.734127  | 3.3226 | 1.58E-18 | 0.8  |
| EPR1      | 8475   | 3.4603 | 6.1E-50  | 0.6393443 | 3.9666 | 3.43E-95 | 0.776886  | 3.7377 | 4.89E-56 | 0.7261905 | 3.8335 | 2.17E-13 | 0.65 |
| NUSAP1    | 51203  | 2.8646 | 2.75E-58 | 0.6666667 | 3.2254 | 7.2E-118 | 0.7752809 | 3.1022 | 1.89E-70 | 0.765873  | 2.9698 | 3.05E-17 | 0.75 |
| KIFC1     | 3833   | 2.8388 | 3.33E-52 | 0.6120219 | 3.2502 | 4.1E-105 | 0.7752809 | 3.0692 | 7.04E-68 | 0.7261905 | 3.1799 | 2.58E-17 | 0.75 |
| CCNB2     | 9133   | 2.9737 | 3.77E-52 | 0.6393443 | 3.4687 | 1.9E-109 | 0.7720706 | 3.2807 | 2.05E-68 | 0.734127  | 3.3612 | 3.42E-18 | 0.75 |
| CENPF     | 1063   | 2.812  | 2.48E-49 | 0.5846995 | 3.2889 | 9.9E-109 | 0.7720706 | 3.0315 | 1.18E-64 | 0.718254  | 2.9809 | 1.20E-16 | 0.65 |
| CKAP2L    | 150468 | 3.0056 | 8.91E-52 | 0.6120219 | 3.4586 | 2.8E-102 | 0.7720706 | 3.2276 | 5.74E-60 | 0.718254  | 3.1361 | 5.16E-17 | 0.75 |
| SGOL1     | 151648 | 2.8652 | 1.85E-44 | 0.5901639 | 3.45   | 8.03E-96 | 0.7688604 | 3.2172 | 3.21E-58 | 0.7261905 | 3.1172 | 8.31E-17 | 0.65 |
| SKA1      | 220134 | 2.8141 | 1.78E-52 | 0.6393443 | 3.2921 | 2.15E-94 | 0.7672552 | 2.9972 | 3.85E-60 | 0.6746032 | 3.4037 | 4.98E-24 | 0.85 |
| PTTG1     | 9232   | 2.7849 | 1.81E-54 | 0.6612022 | 3.2063 | 2.7E-109 | 0.7640449 | 3.0479 | 8.72E-70 | 0.7380952 | 3.2278 | 1.58E-22 | 0.8  |
| TOP2A     | 7153   | 3.3714 | 5.61E-52 | 0.6284153 | 3.8355 | 4.1E-107 | 0.7640449 | 3.5734 | 3.69E-60 | 0.7380952 | 3.2335 | 3.94E-13 | 0.7  |
| CDC20     | 991    | 3.1299 | 1.27E-50 | 0.6721311 | 3.6207 | 9.3E-99  | 0.7640449 | 3.3644 | 7.73E-63 | 0.718254  | 3.6006 | 1.15E-17 | 0.8  |
| TK1       | 7083   | 2.7575 | 2.7E-59  | 0.6612022 | 3.1455 | 1.6E-113 | 0.752809  | 3.0293 | 2.88E-71 | 0.6944444 | 3.1353 | 7.00E-18 | 0.7  |
| BUB1B     | 701    | 2.9415 | 2.13E-53 | 0.6229508 | 3.3454 | 8E-108   | 0.7495987 | 3.1743 | 8.09E-62 | 0.718254  | 3.1452 | 4.32E-15 | 0.8  |
| BIRC5     | 332    | 3.4123 | 5.38E-49 | 0.6284153 | 4.0377 | 4E-104   | 0.7495987 | 3.7599 | 7.07E-61 | 0.7261905 | 3.9089 | 2.45E-15 | 0.65 |
| CNIH2     | 254263 | 2.9947 | 9.46E-46 | 0.6174863 | 3.4205 | 4.37E-84 | 0.7479936 | 3.2204 | 2.2E-60  | 0.702381  | 3.563  | 6.41E-22 | 0.8  |
| HIST1H2BO | 8348   | 2.4438 | 2.44E-35 | 0.6775956 | 2.6414 | 5.3E-56  | 0.7479936 | 2.5467 | 1.33E-43 | 0.7380952 | 2.6762 | 1.70E-18 | 0.8  |
| C16orf59  | 80178  | 2.6554 | 2.12E-53 | 0.6393443 | 3.0106 | 1.4E-113 | 0.7463884 | 2.9584 | 1.29E-72 | 0.7380952 | 3.1164 | 3.59E-19 | 0.8  |
| DEPDC1B   | 55789  | 2.8133 | 2.47E-47 | 0.6284153 | 3.2458 | 1.46E-96 | 0.7447833 | 2.9819 | 1.88E-60 | 0.6984127 | 2.9516 | 1.48E-15 | 0.75 |
| RDM1      | 201299 | 2.6414 | 8.72E-38 | 0.6229508 | 3.0869 | 7.1E-75  | 0.7447833 | 2.7224 | 1.79E-43 | 0.6071429 | 3.0073 | 1.93E-16 | 0.75 |
| CDKN3     | 1033   | 2.7119 | 2.73E-57 | 0.6120219 | 3.0648 | 9.2E-111 | 0.7431782 | 2.9907 | 1.71E-70 | 0.734127  | 2.8955 | 6.45E-19 | 0.7  |
| GTSE1     | 51512  | 2.7384 | 1.27E-51 | 0.5901639 | 3.1784 | 1.1E-100 | 0.741573  | 2.9579 | 5.79E-64 | 0.6904762 | 3.0943 | 1.11E-19 | 0.7  |
| SKA3      | 221150 | 2.7756 | 1.45E-52 | 0.5846995 | 3.2198 | 2.3E-101 | 0.7399679 | 3.0285 | 8.54E-63 | 0.718254  | 3.0428 | 1.43E-17 | 0.8  |
| CDC45     | 8318   | 3.1854 | 2.44E-45 | 0.6010929 | 3.6631 | 5.45E-95 | 0.7399679 | 3.5007 | 6.58E-60 | 0.7103175 | 3.4685 | 4.33E-13 | 0.7  |
| AURKB     | 9212   | 3.1465 | 3.88E-48 | 0.6120219 | 3.6629 | 1.08E-91 | 0.7399679 | 3.4385 | 3.99E-60 | 0.6984127 | 3.8108 | 4.97E-17 | 0.75 |
| MYBL2     | 4605   | 3.3266 | 4.91E-43 | 0.6448087 | 3.8879 | 2.02E-85 | 0.7383628 | 3.6964 | 1.03E-56 | 0.7063492 | 3.8921 | 6.58E-18 | 0.8  |
| NCAPG     | 64151  | 2.7428 | 6.4E-54  | 0.579235  | 3.136  | 4.1E-106 | 0.7303371 | 2.9046 | 4.61E-60 | 0.6706349 | 2.8501 | 6.20E-17 | 0.7  |
| CENPA     | 1058   | 2.8008 | 2.76E-46 | 0.6065574 | 3.2923 | 9.36E-86 | 0.7287319 | 2.9673 | 2.71E-54 | 0.6825397 | 3.1872 | 4.12E-18 | 0.75 |
| CDCA5     | 113130 | 2.5393 | 6.42E-51 | 0.5519126 | 3.0121 | 2.82E-98 | 0.717496  | 2.8603 | 9.39E-67 | 0.6865079 | 3.1345 | 1.33E-22 | 0.7  |
| FAM83D    | 81610  | 2.7954 | 1.18E-47 | 0.6065574 | 3.3828 | 3.95E-89 | 0.7158909 | 3.1769 | 1.27E-57 | 0.7063492 | 3.2443 | 6.61E-20 | 0.8  |

|           |        |        |          |           |        |          |           |        |          |           |        |          |      |
|-----------|--------|--------|----------|-----------|--------|----------|-----------|--------|----------|-----------|--------|----------|------|
| CDCA3     | 83461  | 2.6158 | 2.06E-50 | 0.5846995 | 3.082  | 2.01E-94 | 0.7142857 | 2.8285 | 2.06E-64 | 0.6706349 | 2.8099 | 5.30E-19 | 0.65 |
| MKI67     | 4288   | 2.8789 | 8.24E-47 | 0.5300546 | 3.3362 | 5.8E-100 | 0.7110754 | 3.1078 | 1.12E-57 | 0.6706349 | 3.2507 | 2.34E-15 | 0.75 |
| CDCA8     | 55143  | 2.5378 | 2.85E-54 | 0.5846995 | 2.9209 | 1.2E-99  | 0.7094703 | 2.6944 | 1.65E-64 | 0.6785714 | 2.7752 | 1.77E-21 | 0.75 |
| AURKA     | 6790   | 2.4687 | 5.22E-56 | 0.557377  | 2.949  | 2E-104   | 0.7078652 | 2.8296 | 3.05E-63 | 0.6547619 | 2.9257 | 1.09E-27 | 0.7  |
| DEPDC1    | 55635  | 2.7771 | 3.78E-44 | 0.5464481 | 3.2796 | 8.19E-88 | 0.7078652 | 2.9935 | 1.7E-53  | 0.6626984 | 2.4005 | 2.51E-10 | 0.65 |
| RAD54L    | 8438   | 2.7968 | 6.05E-50 | 0.6120219 | 3.2033 | 1.65E-91 | 0.70626   | 2.9903 | 2.83E-61 | 0.6904762 | 3.2312 | 6.94E-18 | 0.7  |
| HIST1H2AM | 8336   | 2.9095 | 9.61E-44 | 0.6830601 | 2.9597 | 1.12E-65 | 0.7030498 | 3.031  | 2.88E-52 | 0.7301587 | 3.4674 | 1.38E-21 | 0.85 |
| GRM4      | 2914   | 4.2165 | 1.51E-39 | 0.6721311 | 4.1112 | 5.77E-50 | 0.6725522 | 4.3081 | 3.99E-50 | 0.7420635 | 4.1218 | 4.48E-20 | 0.75 |
| C19orf21  | 126353 | 3.3743 | 8.72E-28 | 0.6666667 | 3.1826 | 8.8E-33  | 0.6227929 | 3.7824 | 5.03E-43 | 0.7261905 | 3.8966 | 5.61E-10 | 0.65 |
| CCDC78    | 124093 | 3.2543 | 2.02E-37 | 0.6502732 | 3.2664 | 1.57E-54 | 0.6452648 | 3.4233 | 5.36E-48 | 0.7103175 | 3.5246 | 3.09E-15 | 0.75 |
| HIST2H3C  | 126961 | 2.1824 | 7.43E-34 | 0.5901639 | 2.3125 | 9.01E-49 | 0.6677368 | 2.477  | 2.18E-43 | 0.702381  | 2.9632 | 3.31E-24 | 0.85 |
| GAGE12D   | 1E+08  | NA     | NA       | NA        | NA     | NA       | NA        | NA     | NA       | NA        | 2.0207 | 3.64E-06 | 1    |
| HIST1H3J  | 8356   | NA     | NA       | NA        | NA     | NA       | NA        | NA     | NA       | NA        | 2.0698 | 6.08E-29 | 0.9  |
| HCN2      | 610    | 2.4382 | 1.61E-38 | 0.5355191 | 2.7893 | 3.4E-47  | 0.5987159 | 2.8441 | 3.93E-44 | 0.6587302 | 3.6688 | 4.97E-26 | 0.9  |
| HIST1H3H  | 8357   | 2.9906 | 1.45E-37 | 0.6229508 | 3.1407 | 3.88E-50 | 0.64687   | 3.3008 | 6.02E-42 | 0.6904762 | 3.9221 | 3.51E-24 | 0.9  |
| SAMD14    | 201191 | 2.4031 | 2.2E-50  | 0.5136612 | 2.3833 | 5.97E-79 | 0.5521669 | 2.4629 | 2.49E-58 | 0.5714286 | 3.0411 | 2.01E-21 | 0.85 |
| HOXC13    | 3229   | 2.4635 | 4.68E-16 | 0.5737705 | 2.5726 | 7.8E-25  | 0.600321  | 2.8148 | 5.13E-23 | 0.6587302 | 3.4855 | 9.09E-10 | 0.85 |
| FAM72D    | 728833 | 2.0872 | 3.35E-35 | 0.3879781 | 2.6222 | 9.12E-69 | 0.5955056 | 2.3525 | 7.32E-45 | 0.5238095 | 2.7808 | 1.88E-21 | 0.8  |
| AIM1L     | 55057  | 2.9167 | 8.38E-38 | 0.6338798 | 3.2084 | 7.76E-55 | 0.6789727 | 3.1516 | 1.34E-46 | 0.6785714 | 3.7047 | 4.56E-21 | 0.8  |
| LHX2      | 9355   | 2.0242 | 3.29E-21 | 0.4808743 | 2.5009 | 6.32E-32 | 0.5810594 | 2.2432 | 9.16E-26 | 0.5634921 | 2.8529 | 4.67E-19 | 0.8  |
| FABP6     | 2172   | NA     | NA       | NA        | NA     | NA       | NA        | NA     | NA       | NA        | 3.1259 | 1.44E-18 | 0.8  |
| CTHRC1    | 115908 | 2.5609 | 5.11E-47 | 0.5737705 | 2.3789 | 3.27E-63 | 0.5329053 | 2.5263 | 4.7E-53  | 0.5952381 | 2.8051 | 9.30E-16 | 0.8  |
| CSAG1     | 158511 | NA     | NA       | NA        | NA     | NA       | NA        | NA     | NA       | NA        | 2.9588 | 1.09E-15 | 0.8  |
| CCDC64    | 92558  | 2.9789 | 5.68E-52 | 0.6612022 | 3.0277 | 5.12E-93 | 0.6661316 | 3.0417 | 1.08E-64 | 0.6428571 | 3.3373 | 1.63E-14 | 0.8  |
| SRMS      | 6725   | 2.6082 | 5.45E-27 | 0.5956284 | 2.3292 | 3.4E-27  | 0.5120385 | 2.6575 | 1.06E-31 | 0.5396825 | 3.4978 | 2.25E-12 | 0.8  |
| FAM72B    | 653820 | NA     | NA       | NA        | 2.4843 | 4.23E-67 | 0.5826645 | 2.1858 | 1.87E-46 | 0.5       | 2.5311 | 6.45E-22 | 0.75 |
| CKS2      | 1164   | 2.2929 | 1.73E-61 | 0.5464481 | 2.5695 | 1.2E-105 | 0.6227929 | 2.4005 | 1.48E-68 | 0.5555556 | 2.5883 | 1.17E-20 | 0.75 |
| ZWINT     | 11130  | 2.28   | 3.72E-55 | 0.5136612 | 2.6285 | 1.4E-108 | 0.6548957 | 2.4843 | 2.03E-66 | 0.6031746 | 2.7751 | 1.19E-20 | 0.75 |
| GNG13     | 51764  | 2.6125 | 1.25E-26 | 0.6010929 | 2.8434 | 1.26E-30 | 0.6211878 | 3.1012 | 1.85E-33 | 0.6825397 | 3.186  | 2.44E-19 | 0.75 |
| VGF       | 7425   | 2.1141 | 5.95E-20 | 0.4754098 | 2.791  | 4.2E-35  | 0.6179775 | 2.7653 | 6.63E-29 | 0.5952381 | 3.4599 | 1.06E-18 | 0.75 |
| HIST1H3D  | 8351   | 3.139  | 1.75E-32 | 0.5136612 | 3.3643 | 8.19E-60 | 0.5730337 | 3.3831 | 6.79E-39 | 0.5952381 | 4.1246 | 8.57E-18 | 0.75 |
| S100P     | 6286   | 4.3542 | 3.35E-34 | 0.6174863 | 4.5286 | 4.17E-46 | 0.600321  | 4.6444 | 8.84E-41 | 0.6388889 | 5.1686 | 1.98E-17 | 0.75 |
| CCDC19    | 25790  | 2.632  | 8.85E-40 | 0.6174863 | 2.6779 | 2.68E-52 | 0.5858748 | 2.8064 | 1.46E-50 | 0.6190476 | 3.197  | 9.52E-17 | 0.75 |

|           |        |        |          |           |        |          |           |        |          |           |        |          |      |
|-----------|--------|--------|----------|-----------|--------|----------|-----------|--------|----------|-----------|--------|----------|------|
| MCM10     | 55388  | 2.5569 | 5.28E-38 | 0.5081967 | 3.0918 | 1.05E-71 | 0.670947  | 2.8551 | 7.39E-47 | 0.6507937 | 3.0143 | 9.74E-17 | 0.75 |
| PAFAH1B3  | 5050   | 2.4978 | 2.08E-59 | 0.5519126 | 2.5348 | 3.5E-113 | 0.5810594 | 2.5794 | 4.3E-73  | 0.5992063 | 2.763  | 2.32E-16 | 0.75 |
| HIST3H2BB | 128312 | NA     | NA       | NA        | NA     | NA       | NA        | NA     | NA       | NA        | 2.4233 | 1.01E-15 | 0.75 |
| FAM64A    | 54478  | 2.7525 | 7.38E-41 | 0.5245902 | 3.2575 | 2.53E-86 | 0.6757624 | 2.9822 | 6.92E-55 | 0.6031746 | 3.4113 | 1.04E-15 | 0.75 |
| HOXC11    | 3227   | 2.7653 | 4.34E-16 | 0.6174863 | 2.9701 | 1.43E-23 | 0.64687   | 3.1533 | 7.19E-24 | 0.6349206 | 3.9606 | 1.97E-12 | 0.75 |
| HOXC10    | 3226   | NA     | NA       | NA        | NA     | NA       | NA        | NA     | NA       | NA        | 2.5853 | 4.43E-10 | 0.75 |
| UBE2S     | 27338  | 2.0475 | 1.66E-50 | 0.4699454 | 2.4021 | 3.47E-82 | 0.5698234 | 2.2812 | 1.34E-61 | 0.4722222 | 2.5758 | 5.68E-25 | 0.7  |
| CCNB1     | 891    | 2.1049 | 3.87E-57 | 0.5081967 | 2.4467 | 9.7E-106 | 0.6195827 | 2.3318 | 5.63E-68 | 0.5952381 | 2.4044 | 2.36E-23 | 0.7  |
| FAM54A    | 113115 | 2.3483 | 2.41E-47 | 0.5355191 | 2.8513 | 6.73E-82 | 0.6773676 | 2.624  | 9.37E-62 | 0.6230159 | 2.7497 | 4.80E-22 | 0.7  |
| RAD51     | 5888   | 2.3124 | 3.53E-52 | 0.5464481 | 2.6612 | 8.33E-95 | 0.6565008 | 2.593  | 3.66E-64 | 0.6230159 | 2.6737 | 2.20E-20 | 0.7  |
| TUBB3     | 10381  | 2.4755 | 3.67E-37 | 0.4754098 | 2.7221 | 4.23E-55 | 0.529695  | 2.5575 | 1.53E-37 | 0.4722222 | 3.2367 | 6.94E-20 | 0.7  |
| OIP5      | 11339  | 2.4877 | 1.33E-54 | 0.5956284 | 2.8351 | 1.7E-101 | 0.6934189 | 2.7303 | 2.14E-67 | 0.6428571 | 2.7387 | 6.13E-19 | 0.7  |
| ERCC6L    | 54821  | 2.4158 | 3.09E-49 | 0.5355191 | 2.7792 | 3.78E-91 | 0.6902087 | 2.6092 | 2.34E-57 | 0.6507937 | 2.7122 | 7.51E-18 | 0.7  |
| CCNA2     | 890    | 2.3676 | 6.15E-47 | 0.4972678 | 2.8207 | 1.14E-87 | 0.6532905 | 2.6315 | 8.2E-56  | 0.6428571 | 2.6541 | 1.26E-17 | 0.7  |
| SYNGR3    | 9143   | 2.2565 | 8.49E-31 | 0.5191257 | 2.5648 | 2.2E-50  | 0.5794543 | 2.3874 | 2.36E-39 | 0.5238095 | 3.1194 | 3.70E-17 | 0.7  |
| NCAPH     | 23397  | 2.5147 | 7.92E-48 | 0.5409836 | 2.9786 | 8.01E-95 | 0.6757624 | 2.754  | 7.47E-59 | 0.6587302 | 2.8065 | 1.55E-16 | 0.7  |
| MAPK8IP2  | 23542  | 2.1071 | 9.52E-23 | 0.4644809 | 2.2485 | 2.51E-30 | 0.5168539 | 2.3306 | 4.65E-31 | 0.5119048 | 3.1589 | 1.17E-15 | 0.7  |
| KIF23     | 9493   | 2.3894 | 4.86E-49 | 0.5628415 | 2.7665 | 7.03E-95 | 0.6725522 | 2.5881 | 5.16E-58 | 0.6150794 | 2.5537 | 1.48E-15 | 0.7  |
| ESPL1     | 9700   | 2.6827 | 6.8E-44  | 0.5191257 | 3.088  | 4.52E-94 | 0.6918138 | 2.9615 | 1.3E-55  | 0.6706349 | 3.1017 | 6.95E-15 | 0.7  |
| HAPLN1    | 1404   | 3.4572 | 1.46E-28 | 0.6065574 | 3.4128 | 2.58E-39 | 0.6227929 | 3.0151 | 5.57E-26 | 0.5436508 | 3.6427 | 1.82E-14 | 0.7  |
| CENPM     | 79019  | 2.846  | 7.73E-49 | 0.6065574 | 3.1824 | 1.4E-105 | 0.6837881 | 3.1288 | 1.52E-62 | 0.6666667 | 3.3542 | 6.05E-14 | 0.7  |
| CTXN1     | 404217 | 2.8336 | 8.43E-47 | 0.6065574 | 2.8507 | 7.48E-83 | 0.611557  | 2.85   | 2.38E-53 | 0.5793651 | 2.897  | 1.37E-13 | 0.7  |
| RTBDN     | 83546  | NA     | NA       | NA        | 2.6286 | 2.81E-23 | 0.6292135 | 2.4448 | 1.78E-19 | 0.6190476 | 2.4418 | 6.41E-12 | 0.7  |
| C20orf103 | 24141  | 3.2015 | 1.03E-41 | 0.6502732 | 2.8238 | 3.81E-41 | 0.5778491 | 3.2807 | 1.03E-48 | 0.6547619 | 3.138  | 1.16E-10 | 0.7  |
| CNTNAP2   | 26047  | 3.6292 | 4.47E-25 | 0.5519126 | 3.1036 | 8.23E-21 | 0.4783307 | 3.8264 | 4.08E-29 | 0.5873016 | 3.7026 | 5.29E-09 | 0.7  |

Note: NA denotes the gene is not up regulated in that cancer stage.

Supplementary Table 3b. Down regulated genes in 70% of overall patients

| Down-regulated genes |        | StageI |          |           | StageII |           |           | StageIII |          |           | StageIV |          |           |
|----------------------|--------|--------|----------|-----------|---------|-----------|-----------|----------|----------|-----------|---------|----------|-----------|
| GeneName             | GeneID | FC     | FDR      | frequency | FC      | FDR       | frequency | FC       | FDR      | frequency | FC      | FDR      | frequency |
| FHL1                 | 2273   | -4.145 | 1.18E-62 | 1         | -4.4389 | 5.48E-119 | 0.993579  | -4.169   | 4.52E-75 | 0.988095  | -4.615  | 5.64E-19 | 1         |
| GLYAT                | 10249  | -5.924 | 6.39E-62 | 1         | -6.5306 | 1.86E-121 | 0.993579  | -6.388   | 1.08E-75 | 0.992063  | -7.015  | 6.22E-21 | 1         |
| PYGM                 | 5837   | -3.613 | 1.46E-57 | 1         | -3.693  | 4.55E-107 | 1         | -3.457   | 8.54E-63 | 1         | -3.539  | 8.79E-14 | 1         |
| TRDN                 | 10345  | -4.473 | 2.84E-52 | 1         | -4.2383 | 1.82E-74  | 0.991974  | -4.056   | 1.83E-49 | 1         | -4.307  | 5.14E-10 | 1         |
| MYH1                 | 4619   | -3.852 | 1.18E-47 | 1         | -3.9602 | 2.82E-98  | 0.99679   | -3.684   | 6.92E-50 | 0.996032  | -3.957  | 1.92E-09 | 1         |
| TNNT3                | 7140   | -3.956 | 1.04E-40 | 1         | -4.3767 | 1.57E-62  | 0.995185  | -3.809   | 5.24E-38 | 0.992063  | -4.789  | 2.26E-17 | 1         |
| FIGF                 | 2277   | -6.145 | 1.94E-87 | 0.994536  | -6.4651 | 1.52E-142 | 0.982343  | -6.094   | 1.59E-90 | 0.968254  | -6.652  | 4.49E-44 | 1         |
| MYOM1                | 8736   | -3.776 | 5.04E-72 | 0.994536  | -3.9926 | 2.77E-123 | 1         | -3.889   | 2.82E-79 | 0.996032  | -3.979  | 1.17E-20 | 1         |
| MYOC                 | 4653   | -6.046 | 1.53E-63 | 0.994536  | -6.559  | 3.58E-140 | 0.993579  | -6.376   | 5.54E-85 | 1         | -7.181  | 6.07E-21 | 1         |
| LEP                  | 3952   | -6.83  | 5.10E-52 | 0.994536  | -7.6419 | 8.81E-96  | 0.988764  | -7.368   | 1.22E-62 | 0.992063  | -8.241  | 1.18E-20 | 1         |
| HSPB7                | 27129  | -4.319 | 7.46E-52 | 0.994536  | -4.5585 | 1.14E-97  | 0.988764  | -4.208   | 7.45E-60 | 0.984127  | -4.436  | 1.22E-12 | 1         |
| DEFB132              | 400830 | -3.968 | 1.23E-35 | 0.994536  | -4.559  | 2.05E-64  | 0.974318  | -4.486   | 2.82E-48 | 0.984127  | -4.924  | 1.17E-11 | 1         |
| DES                  | 1674   | -3.744 | 1.47E-33 | 0.994536  | -3.9831 | 1.27E-47  | 0.979133  | -3.398   | 1.23E-27 | 0.980159  | -4.005  | 5.93E-10 | 1         |
| AMPD1                | 270    | -2.857 | 3.45E-25 | 0.994536  | -2.7874 | 6.24E-35  | 0.974318  | -2.592   | 1.09E-22 | 0.972222  | -2.981  | 2.60E-06 | 0.95      |
| LOC283392            | 283392 | -5.514 | 8.53E-60 | 0.989071  | -5.997  | 1.07E-113 | 0.99679   | -5.622   | 7.31E-66 | 0.988095  | -6.506  | 1.16E-20 | 1         |
| ACVR1C               | 130399 | -4.692 | 3.49E-56 | 0.989071  | -5.0639 | 3.98E-106 | 0.995185  | -4.967   | 2.05E-68 | 0.992063  | -5.155  | 2.98E-16 | 1         |
| KIAA0408             | 9729   | -5.956 | 5.69E-56 | 0.989071  | -6.1506 | 7.12E-93  | 0.985554  | -5.665   | 7.17E-59 | 0.97619   | -6.701  | 3.35E-22 | 1         |
| CA3                  | 761    | -4.294 | 1.36E-52 | 0.989071  | -4.7378 | 3.04E-78  | 0.991974  | -4.855   | 2.23E-59 | 0.996032  | -5.116  | 1.33E-17 | 1         |
| OXTR                 | 5021   | -4.182 | 6.49E-40 | 0.989071  | -4.3595 | 1.96E-79  | 0.956661  | -4.133   | 7.73E-44 | 0.960317  | -4.455  | 8.58E-09 | 1         |
| GYS2                 | 2998   | -3.354 | 3.43E-38 | 0.989071  | -3.4116 | 5.67E-83  | 0.988764  | -3.531   | 2.05E-51 | 0.988095  | -3.765  | 7.15E-09 | 1         |
| GPAM                 | 57678  | -3.569 | 4.42E-62 | 0.983607  | -3.6716 | 3.13E-133 | 0.985554  | -3.644   | 3.86E-78 | 0.984127  | -3.845  | 1.39E-14 | 1         |
| APOB                 | 338    | -5.136 | 2.67E-59 | 0.983607  | -5.544  | 1.66E-112 | 0.990369  | -5.443   | 5.22E-75 | 0.996032  | -5.614  | 3.42E-17 | 1         |
| GLRA4                | 441509 | -3.297 | 8.97E-57 | 0.983607  | -3.2605 | 2.15E-104 | 0.94703   | -3.184   | 3.65E-59 | 0.944444  | -3.296  | 7.59E-12 | 0.95      |
| LHCGR                | 3973   | -3.404 | 2.00E-46 | 0.983607  | -3.5341 | 4.60E-111 | 0.977528  | -3.482   | 4.06E-58 | 0.960317  | -3.804  | 3.66E-11 | 1         |
| ADH1B                | 125    | -5.896 | 8.85E-43 | 0.983607  | -7.4792 | 8.66E-66  | 0.987159  | -6.53    | 3.36E-47 | 0.97619   | -7.524  | 4.60E-22 | 1         |
| C12orf39             | 80763  | -4.447 | 7.12E-41 | 0.983607  | -4.6661 | 4.30E-89  | 0.979133  | -4.763   | 4.60E-56 | 0.984127  | -4.538  | 6.59E-09 | 0.95      |
| SMYD1                | 150572 | -5.144 | 8.14E-40 | 0.983607  | -5.6981 | 4.50E-79  | 0.977528  | -5.64    | 1.25E-53 | 0.97619   | -5.867  | 1.29E-11 | 0.9       |
| LOC729467            | 729467 | -2.228 | 3.56E-37 | 0.983607  | -2.2097 | 1.24E-90  | 0.982343  | -2.24    | 1.76E-49 | 0.996032  | -2.335  | 5.52E-07 | 1         |
| MYOM2                | 9172   | -2.135 | 5.05E-24 | 0.983607  | -2.555  | 1.17E-47  | 0.991974  | -2.239   | 1.02E-28 | 0.984127  | -2.579  | 1.38E-08 | 1         |
| LYVE1                | 10894  | -4.762 | 6.10E-68 | 0.978142  | -5.1902 | 3.65E-141 | 0.988764  | -4.897   | 1.63E-80 | 0.992063  | -4.904  | 1.01E-19 | 0.95      |
| ADRA1A               | 148    | -4.236 | 1.54E-67 | 0.978142  | -4.2498 | 1.71E-110 | 0.974318  | -4.264   | 6.60E-78 | 0.988095  | -4.196  | 3.40E-17 | 1         |

|         |        |        |          |          |         |           |          |        |          |          |        |          |      |
|---------|--------|--------|----------|----------|---------|-----------|----------|--------|----------|----------|--------|----------|------|
| SLC2A4  | 6517   | -4.324 | 6.09E-67 | 0.978142 | -4.5512 | 3.43E-109 | 0.982343 | -4.186 | 1.41E-73 | 0.992063 | -4.451 | 3.17E-19 | 1    |
| HEPACAM | 220296 | -5.184 | 7.38E-62 | 0.978142 | -5.7882 | 9.86E-111 | 0.987159 | -5.434 | 1.99E-68 | 0.984127 | -5.708 | 9.22E-22 | 1    |
| AQP7P1  | 375719 | -5.174 | 7.91E-62 | 0.978142 | -5.7938 | 6.67E-121 | 0.991974 | -5.548 | 1.11E-73 | 0.984127 | -5.941 | 4.93E-22 | 1    |
| CKMT2   | 1160   | -3.409 | 1.46E-57 | 0.978142 | -3.5543 | 7.91E-72  | 0.969502 | -3.332 | 1.45E-59 | 0.968254 | -3.418 | 1.70E-16 | 0.95 |
| KCNIP2  | 30819  | -4.666 | 1.74E-54 | 0.978142 | -5.2241 | 2.31E-111 | 0.995185 | -4.951 | 2.35E-66 | 0.980159 | -5.159 | 5.28E-16 | 1    |
| ADH1A   | 124    | -4.951 | 1.76E-54 | 0.978142 | -5.7898 | 1.92E-105 | 0.987159 | -5.327 | 1.97E-64 | 0.980159 | -5.518 | 4.87E-19 | 1    |
| AQPEP   | 206338 | -4.566 | 3.58E-54 | 0.978142 | -4.839  | 1.18E-109 | 0.998395 | -4.715 | 6.44E-64 | 0.980159 | -5.088 | 1.40E-15 | 1    |
| AQP7P3  | 441432 | -3.67  | 4.60E-50 | 0.978142 | -3.9221 | 6.86E-119 | 0.982343 | -3.781 | 6.59E-63 | 0.988095 | -3.94  | 9.49E-12 | 1    |
| GPD1    | 2819   | -5.488 | 1.05E-48 | 0.978142 | -6.4797 | 1.28E-84  | 0.985554 | -6.056 | 1.13E-57 | 0.97619  | -6.367 | 7.11E-19 | 1    |
| SLC19A3 | 80704  | -4.859 | 1.55E-46 | 0.978142 | -5.6884 | 2.30E-81  | 0.988764 | -5.435 | 4.63E-53 | 0.968254 | -5.889 | 9.40E-17 | 1    |
| HBB     | 3043   | -4.049 | 3.26E-44 | 0.978142 | -4.5872 | 3.48E-90  | 0.990369 | -4.191 | 3.37E-48 | 0.97619  | -4.52  | 1.05E-12 | 0.95 |
| HBA2    | 3040   | -3.629 | 1.12E-39 | 0.978142 | -4.0269 | 6.26E-78  | 0.977528 | -3.549 | 2.08E-40 | 0.936508 | -3.665 | 1.37E-09 | 0.9  |
| ADIPOQ  | 9370   | -5.735 | 2.21E-38 | 0.978142 | -7.2661 | 6.89E-61  | 0.985554 | -6.586 | 2.43E-44 | 0.972222 | -8.315 | 1.32E-19 | 1    |
| CSN1S1  | 1446   | -3.399 | 7.21E-22 | 0.978142 | -3.6912 | 8.71E-61  | 0.987159 | -3.778 | 1.82E-40 | 0.992063 | -4.156 | 7.27E-07 | 1    |
| LALBA   | 3906   | -3.059 | 6.59E-17 | 0.978142 | -2.9488 | 3.70E-29  | 0.985554 | -3.177 | 1.40E-25 | 0.988095 | -2.707 | 0.004343 | 1    |
| CPA1    | 1357   | -4.356 | 3.73E-81 | 0.972678 | -4.5694 | 3.92E-151 | 0.980738 | -4.297 | 4.22E-86 | 0.968254 | -4.222 | 1.36E-22 | 1    |
| CA4     | 762    | -6.629 | 7.19E-78 | 0.972678 | -7.3688 | 1.26E-156 | 0.985554 | -6.939 | 1.49E-92 | 0.97619  | -7.117 | 8.85E-38 | 1    |
| CD300LG | 146894 | -5.939 | 3.74E-69 | 0.972678 | -6.9294 | 9.86E-112 | 0.988764 | -6.368 | 4.04E-77 | 0.988095 | -6.941 | 2.27E-39 | 1    |
| SCARA5  | 286133 | -6.008 | 3.15E-63 | 0.972678 | -6.7556 | 3.52E-105 | 0.987159 | -6.447 | 3.33E-75 | 0.972222 | -6.801 | 5.34E-34 | 1    |
| LPL     | 4023   | -4.486 | 1.20E-58 | 0.972678 | -4.7867 | 4.53E-103 | 0.979133 | -4.69  | 1.87E-73 | 0.984127 | -4.938 | 2.33E-19 | 1    |
| AQP7    | 364    | -5.417 | 3.83E-55 | 0.972678 | -6.3776 | 2.14E-94  | 0.993579 | -5.685 | 1.03E-59 | 0.972222 | -6.604 | 7.79E-23 | 1    |
| ADH4    | 127    | -3.708 | 1.47E-53 | 0.972678 | -4.0228 | 9.74E-109 | 0.958266 | -3.897 | 3.56E-65 | 0.956349 | -4.303 | 1.44E-15 | 1    |
| KLB     | 152831 | -3.874 | 1.41E-49 | 0.972678 | -4.2424 | 5.03E-98  | 0.983949 | -4.24  | 4.02E-64 | 0.980159 | -4.342 | 3.15E-13 | 1    |
| PLIN1   | 5346   | -5.378 | 1.29E-48 | 0.972678 | -6.4845 | 5.91E-83  | 0.990369 | -5.906 | 1.45E-56 | 0.97619  | -6.97  | 1.54E-19 | 1    |
| PLIN4   | 729359 | -5.19  | 4.66E-48 | 0.972678 | -6.0449 | 3.22E-81  | 0.975923 | -5.605 | 9.07E-59 | 0.968254 | -5.986 | 1.84E-18 | 1    |
| FRMD1   | 79981  | -3.852 | 7.40E-47 | 0.972678 | -4.0517 | 1.77E-85  | 0.972713 | -3.794 | 3.33E-52 | 0.960317 | -4.493 | 2.30E-14 | 1    |
| GYG2    | 8908   | -3.38  | 2.27E-45 | 0.972678 | -3.4548 | 3.31E-75  | 0.987159 | -3.578 | 2.84E-53 | 0.984127 | -3.511 | 2.75E-10 | 0.95 |
| SLC7A10 | 56301  | -4.757 | 5.32E-43 | 0.972678 | -5.0817 | 1.71E-78  | 0.979133 | -4.924 | 1.20E-48 | 0.956349 | -5.257 | 1.70E-12 | 1    |
| TUSC5   | 286753 | -5.726 | 7.03E-43 | 0.972678 | -7.0119 | 2.44E-71  | 0.980738 | -6.393 | 9.87E-49 | 0.956349 | -7.535 | 5.23E-20 | 1    |
| PCK1    | 5105   | -5.246 | 1.57E-40 | 0.972678 | -6.1456 | 6.58E-75  | 0.987159 | -5.575 | 1.97E-47 | 0.980159 | -6.546 | 4.77E-15 | 1    |
| ANGPTL5 | 253935 | -3.006 | 1.16E-34 | 0.972678 | -3.2123 | 5.73E-74  | 0.974318 | -3.14  | 3.89E-46 | 0.972222 | -3.503 | 3.77E-09 | 1    |
| HBA1    | 3039   | -5.089 | 5.14E-34 | 0.972678 | -5.4079 | 1.18E-58  | 0.979133 | -4.529 | 3.86E-32 | 0.956349 | -5.145 | 3.20E-09 | 0.9  |
| GLP2R   | 9340   | -2.614 | 3.65E-32 | 0.972678 | -2.7311 | 5.37E-81  | 0.975923 | -2.812 | 1.54E-50 | 0.992063 | -2.94  | 1.01E-07 | 1    |
| HHATL   | 57467  | -2.761 | 1.02E-29 | 0.972678 | -2.9556 | 6.87E-78  | 0.991974 | -2.939 | 3.21E-51 | 1        | -3.153 | 9.02E-09 | 1    |

|           |        |        |          |          |         |           |          |        |          |          |        |          |      |
|-----------|--------|--------|----------|----------|---------|-----------|----------|--------|----------|----------|--------|----------|------|
| SDPR      | 8436   | -4.43  | 2.30E-82 | 0.967213 | -4.9075 | 3.26E-120 | 0.956661 | -4.328 | 2.82E-79 | 0.920635 | -5.086 | 1.43E-45 | 1    |
| LRRC2     | 79442  | -3.443 | 2.06E-63 | 0.967213 | -3.576  | 5.06E-96  | 0.969502 | -3.366 | 1.35E-70 | 0.956349 | -3.754 | 4.61E-28 | 1    |
| ATP1A2    | 477    | -4.883 | 4.88E-61 | 0.967213 | -5.691  | 1.23E-88  | 0.977528 | -5.009 | 2.97E-65 | 0.988095 | -6.363 | 2.58E-29 | 1    |
| HEPN1     | 641654 | -4.994 | 2.75E-58 | 0.967213 | -5.5186 | 1.23E-106 | 0.977528 | -5.255 | 7.88E-68 | 0.972222 | -5.613 | 8.86E-20 | 1    |
| AOC3      | 8639   | -3.487 | 6.83E-57 | 0.967213 | -3.7736 | 1.12E-104 | 0.967897 | -3.397 | 2.82E-64 | 0.960317 | -3.702 | 4.46E-16 | 1    |
| ALDH1L1   | 10840  | -5.129 | 9.01E-57 | 0.967213 | -5.7279 | 2.48E-92  | 0.980738 | -5.522 | 3.54E-65 | 0.992063 | -5.446 | 1.16E-20 | 1    |
| RDH5      | 5959   | -3.933 | 3.85E-56 | 0.967213 | -4.2588 | 3.66E-106 | 0.974318 | -4.11  | 3.06E-62 | 0.952381 | -4.346 | 2.61E-16 | 1    |
| LIPE      | 3991   | -3.87  | 3.88E-48 | 0.967213 | -4.381  | 3.56E-87  | 0.975923 | -4.064 | 5.60E-56 | 0.952381 | -4.172 | 2.46E-13 | 1    |
| C14orf180 | 400258 | -5.232 | 9.87E-47 | 0.967213 | -6.0396 | 9.58E-90  | 0.982343 | -5.556 | 1.20E-55 | 0.952381 | -5.603 | 7.68E-15 | 1    |
| RBP4      | 5950   | -5.15  | 2.85E-46 | 0.967213 | -5.71   | 1.56E-80  | 0.977528 | -5.534 | 2.27E-58 | 0.980159 | -5.591 | 1.61E-15 | 1    |
| CIDEC     | 63924  | -5.648 | 6.12E-45 | 0.967213 | -6.9027 | 9.83E-80  | 0.985554 | -6.419 | 2.13E-52 | 0.97619  | -7.349 | 1.35E-19 | 1    |
| MRAP      | 56246  | -5.481 | 8.08E-45 | 0.967213 | -6.1325 | 3.12E-88  | 0.977528 | -5.791 | 1.22E-54 | 0.968254 | -6.319 | 1.95E-14 | 1    |
| LOC55908  | 55908  | -3.783 | 2.75E-43 | 0.967213 | -3.9856 | 2.98E-90  | 0.966292 | -3.853 | 2.74E-54 | 0.968254 | -3.835 | 1.23E-09 | 0.95 |
| LGALS12   | 85329  | -4.552 | 8.88E-42 | 0.967213 | -5.3928 | 1.91E-74  | 0.967897 | -4.862 | 8.28E-48 | 0.956349 | -5.24  | 4.03E-13 | 0.95 |
| EPB42     | 2038   | -3.67  | 5.68E-40 | 0.967213 | -3.9887 | 1.43E-94  | 0.974318 | -3.872 | 8.93E-54 | 0.980159 | -4.065 | 9.14E-10 | 1    |
| SLC22A12  | 116085 | -2.738 | 3.54E-37 | 0.967213 | -2.8312 | 4.63E-96  | 0.977528 | -2.794 | 1.22E-47 | 0.97619  | -3.048 | 4.56E-08 | 1    |
| HSD17B13  | 345275 | -4.755 | 1.13E-64 | 0.961749 | -5.1744 | 5.70E-138 | 0.991974 | -5.067 | 4.03E-81 | 0.992063 | -5.041 | 1.64E-18 | 1    |
| TNMD      | 64102  | -5.048 | 8.38E-61 | 0.961749 | -5.4655 | 2.37E-96  | 0.958266 | -5.276 | 1.57E-71 | 0.968254 | -5.606 | 9.21E-26 | 1    |
| HSPB6     | 126393 | -4.353 | 3.25E-60 | 0.961749 | -4.9215 | 3.42E-111 | 0.983949 | -4.408 | 3.14E-70 | 0.964286 | -4.459 | 1.00E-18 | 0.95 |
| SORBS1    | 10580  | -3.155 | 5.59E-58 | 0.961749 | -3.4112 | 1.39E-103 | 0.966292 | -3.435 | 3.46E-69 | 0.964286 | -3.844 | 3.51E-19 | 1    |
| FAM180B   | 399888 | -3.774 | 2.50E-50 | 0.961749 | -3.8352 | 6.50E-80  | 0.945425 | -3.662 | 8.54E-54 | 0.952381 | -4.212 | 4.75E-15 | 1    |
| CRHBP     | 1393   | -3.369 | 2.93E-50 | 0.961749 | -3.6223 | 3.63E-95  | 0.967897 | -3.322 | 1.37E-57 | 0.988095 | -3.949 | 3.21E-15 | 1    |
| CES1      | 1066   | -4.291 | 8.94E-47 | 0.961749 | -4.3916 | 8.27E-73  | 0.948636 | -4.142 | 6.82E-53 | 0.960317 | -4.314 | 2.10E-17 | 1    |
| GSTM5     | 2949   | -3.932 | 3.08E-44 | 0.961749 | -4.399  | 3.02E-81  | 0.967897 | -3.882 | 5.30E-50 | 0.956349 | -3.637 | 1.74E-15 | 0.95 |
| BMP3      | 651    | -3.704 | 1.63E-42 | 0.961749 | -3.8706 | 4.83E-69  | 0.961477 | -3.825 | 5.78E-49 | 0.956349 | -3.615 | 2.18E-11 | 0.9  |
| PRRT4     | 401399 | -3.678 | 9.67E-42 | 0.961749 | -3.6741 | 7.48E-64  | 0.934189 | -3.331 | 6.51E-40 | 0.912698 | -3.473 | 3.21E-10 | 1    |
| TRHDE     | 29953  | -3.883 | 7.99E-40 | 0.961749 | -4.1265 | 2.62E-72  | 0.966292 | -3.793 | 3.83E-45 | 0.952381 | -4.333 | 1.26E-11 | 1    |
| HPD       | 3242   | -3.242 | 2.68E-31 | 0.961749 | -3.2074 | 2.33E-58  | 0.969502 | -3.174 | 7.78E-41 | 0.980159 | -3.585 | 7.99E-09 | 0.95 |
| HSD3B2    | 3284   | -2.34  | 1.33E-13 | 0.961749 | -2.4287 | 7.94E-28  | 0.967897 | -2.497 | 1.21E-17 | 0.956349 | -2.238 | 0.003077 | 0.95 |
| LOC572558 | 572558 | -3.661 | 3.92E-80 | 0.956284 | -3.7853 | 1.46E-137 | 0.94382  | -3.555 | 6.66E-83 | 0.912698 | -3.881 | 1.41E-27 | 0.95 |
| ANGPT4    | 51378  | -3.377 | 7.42E-63 | 0.956284 | -3.5026 | 1.81E-115 | 0.958266 | -3.19  | 3.52E-58 | 0.90873  | -3.843 | 4.83E-19 | 0.9  |
| KCNJ16    | 3773   | -4.851 | 7.40E-57 | 0.956284 | -5.2393 | 1.64E-90  | 0.934189 | -5.091 | 5.13E-68 | 0.928571 | -6.086 | 7.44E-29 | 0.95 |
| ACACB     | 32     | -3.265 | 2.19E-56 | 0.956284 | -3.6018 | 1.56E-96  | 0.955056 | -3.251 | 3.06E-62 | 0.936508 | -3.937 | 1.56E-19 | 1    |
| CHRDL1    | 91851  | -4.961 | 1.01E-54 | 0.956284 | -5.5504 | 8.19E-81  | 0.975923 | -5.232 | 2.54E-58 | 0.972222 | -6.337 | 7.25E-29 | 1    |



|          |        |        |          |          |         |           |          |        |          |          |        |          |      |
|----------|--------|--------|----------|----------|---------|-----------|----------|--------|----------|----------|--------|----------|------|
| TMEM132C | 92293  | -5.105 | 5.81E-53 | 0.956284 | -6.1296 | 1.02E-89  | 0.980738 | -5.459 | 1.20E-56 | 0.952381 | -6.229 | 5.89E-25 | 0.95 |
| C13orf36 | 400120 | -3.151 | 4.25E-48 | 0.956284 | -3.2053 | 1.97E-88  | 0.945425 | -3.271 | 1.34E-62 | 0.960317 | -3.232 | 4.54E-11 | 0.95 |
| RXRG     | 6258   | -3.222 | 8.84E-48 | 0.956284 | -3.0712 | 4.42E-60  | 0.906902 | -2.873 | 7.85E-46 | 0.920635 | -2.292 | 4.06E-07 | 0.75 |
| KLHL31   | 401265 | -2.9   | 2.55E-46 | 0.956284 | -3.2704 | 1.34E-94  | 0.977528 | -3.417 | 2.18E-62 | 0.968254 | -3.668 | 1.47E-15 | 1    |
| PFKFB1   | 5207   | -3.539 | 7.28E-43 | 0.956284 | -3.7535 | 5.79E-72  | 0.951846 | -3.46  | 2.33E-45 | 0.924603 | -4.087 | 9.45E-13 | 0.95 |
| ABCD2    | 225    | -3.704 | 2.86E-42 | 0.956284 | -3.8855 | 5.85E-76  | 0.967897 | -3.982 | 7.02E-55 | 0.980159 | -4.523 | 6.46E-15 | 1    |
| CIDEA    | 1149   | -5.292 | 1.76E-39 | 0.956284 | -6.3158 | 5.58E-75  | 0.977528 | -5.783 | 2.29E-47 | 0.944444 | -6.618 | 2.69E-17 | 1    |
| GPR144   | 347088 | -4.016 | 1.76E-38 | 0.956284 | -4.2483 | 1.37E-90  | 0.974318 | -3.838 | 6.36E-38 | 0.928571 | -4.117 | 5.39E-08 | 0.9  |
| PDE3B    | 5140   | -2.988 | 3.42E-32 | 0.956284 | -3.2604 | 3.79E-56  | 0.959872 | -3.252 | 9.70E-42 | 0.940476 | -3.794 | 2.74E-10 | 1    |
| LRRC3B   | 116135 | -4.103 | 1.00E-72 | 0.95082  | -4.3694 | 1.80E-133 | 0.948636 | -4.191 | 3.38E-84 | 0.952381 | -4.36  | 4.25E-28 | 0.95 |
| BTNL9    | 153579 | -4.09  | 3.26E-70 | 0.95082  | -4.5373 | 6.58E-112 | 0.971108 | -4.086 | 6.63E-72 | 0.940476 | -4.646 | 2.87E-29 | 1    |
| ITIH5    | 80760  | -3.992 | 6.46E-70 | 0.95082  | -4.3841 | 3.19E-115 | 0.966292 | -4.053 | 1.80E-80 | 0.956349 | -4.469 | 1.01E-29 | 1    |
| MESTIT1  | 317751 | -3.616 | 2.48E-68 | 0.95082  | -3.8025 | 1.86E-121 | 0.961477 | -3.652 | 8.21E-83 | 0.964286 | -4.065 | 9.62E-26 | 1    |
| NAALAD2  | 10003  | -3.106 | 1.06E-61 | 0.95082  | -3.2402 | 9.72E-116 | 0.958266 | -3.157 | 8.66E-77 | 0.948413 | -3.067 | 4.15E-16 | 0.85 |
| ACSM5    | 54988  | -3.436 | 1.95E-49 | 0.95082  | -3.7916 | 8.53E-87  | 0.969502 | -3.412 | 4.04E-59 | 0.952381 | -4.178 | 1.04E-16 | 1    |
| PCOLCE2  | 26577  | -4.834 | 4.67E-44 | 0.95082  | -5.2427 | 1.50E-70  | 0.969502 | -5.303 | 2.41E-56 | 0.984127 | -5.463 | 8.36E-17 | 0.95 |
| CASQ2    | 845    | -3.171 | 2.86E-42 | 0.95082  | -3.5986 | 9.21E-65  | 0.924559 | -3.005 | 4.64E-42 | 0.884921 | -4.161 | 9.39E-21 | 0.9  |
| GOS2     | 50486  | -3.801 | 8.13E-41 | 0.95082  | -4.214  | 7.55E-78  | 0.961477 | -4.109 | 3.36E-50 | 0.936508 | -4.092 | 5.25E-13 | 1    |
| ALB      | 213    | -3.88  | 2.53E-21 | 0.95082  | -4.1372 | 8.12E-33  | 0.9374   | -3.932 | 6.06E-23 | 0.93254  | -3.187 | 0.000842 | 0.9  |
| MME      | 4311   | -4.099 | 3.12E-69 | 0.945355 | -4.3227 | 4.77E-95  | 0.939005 | -4.094 | 7.03E-74 | 0.940476 | -4.429 | 1.61E-37 | 0.95 |
| NPR1     | 4881   | -3.376 | 6.09E-67 | 0.945355 | -3.6208 | 2.45E-117 | 0.964687 | -3.326 | 1.33E-70 | 0.936508 | -3.259 | 1.19E-18 | 1    |
| TRPM3    | 80036  | -3.035 | 1.21E-62 | 0.945355 | -3.0463 | 4.91E-118 | 0.918138 | -2.897 | 1.65E-63 | 0.880952 | -2.811 | 6.04E-16 | 0.95 |
| ANGPTL7  | 10218  | -5.414 | 5.27E-60 | 0.945355 | -5.8529 | 3.13E-115 | 0.953451 | -5.575 | 1.22E-73 | 0.952381 | -6.305 | 1.94E-26 | 1    |
| SCN4A    | 6329   | -3.403 | 5.02E-57 | 0.945355 | -3.8356 | 2.88E-87  | 0.966292 | -3.419 | 1.11E-55 | 0.920635 | -3.889 | 4.39E-21 | 0.95 |
| PCDH9    | 5101   | -3.551 | 1.07E-55 | 0.945355 | -3.633  | 6.43E-68  | 0.924559 | -3.801 | 1.13E-57 | 0.944444 | -3.803 | 1.07E-17 | 0.95 |
| ITGA7    | 3679   | -3.34  | 6.23E-55 | 0.945355 | -3.6193 | 6.23E-92  | 0.942215 | -3.339 | 3.48E-56 | 0.900794 | -3.68  | 3.67E-17 | 1    |
| PAPPA2   | 60676  | -3.675 | 4.75E-53 | 0.945355 | -3.812  | 1.36E-93  | 0.950241 | -3.682 | 3.64E-62 | 0.944444 | -3.944 | 9.10E-17 | 0.95 |
| KLHL33   | 123103 | -2.502 | 2.22E-51 | 0.945355 | -2.6146 | 1.34E-99  | 0.963082 | -2.433 | 3.48E-54 | 0.916667 | -2.695 | 6.97E-15 | 0.95 |
| FABP4    | 2167   | -5.453 | 1.92E-45 | 0.945355 | -6.5052 | 1.08E-74  | 0.985554 | -5.917 | 1.35E-51 | 0.968254 | -6.423 | 9.96E-23 | 1    |
| KCNA4    | 3739   | -2.554 | 3.08E-40 | 0.945355 | -2.5453 | 8.55E-70  | 0.94703  | -2.57  | 2.59E-51 | 0.964286 | -2.44  | 1.24E-07 | 0.95 |
| PGA3     | 643834 | -3.129 | 1.20E-36 | 0.945355 | -3.2533 | 5.42E-71  | 0.959872 | -3.219 | 7.22E-44 | 0.948413 | -3.54  | 3.20E-10 | 0.95 |
| SEL1L2   | 80343  | -2.469 | 3.51E-36 | 0.945355 | -2.5107 | 3.44E-80  | 0.963082 | -2.479 | 9.01E-46 | 0.972222 | -2.717 | 1.94E-08 | 1    |
| GABRA4   | 2557   | -2.336 | 7.11E-34 | 0.945355 | -2.3605 | 5.80E-59  | 0.934189 | -2.437 | 2.98E-45 | 0.936508 | -2.562 | 7.48E-08 | 0.95 |
| PENK     | 5179   | -3.794 | 1.49E-33 | 0.945355 | -4.2141 | 3.43E-69  | 0.975923 | -3.795 | 1.55E-43 | 0.964286 | -4.538 | 2.30E-13 | 1    |

|           |        |        |          |          |         |           |          |        |          |          |        |          |      |
|-----------|--------|--------|----------|----------|---------|-----------|----------|--------|----------|----------|--------|----------|------|
| CYP1A1    | 1543   | -2.164 | 8.14E-12 | 0.945355 | -2.3529 | 5.98E-31  | 0.971108 | -2.168 | 8.46E-15 | 0.952381 | -2.513 | 0.001196 | 1    |
| CSN3      | 1448   | -2.56  | 1.46E-11 | 0.945355 | -2.8231 | 1.64E-25  | 0.967897 | -2.841 | 2.73E-16 | 0.968254 | -2.742 | 0.002854 | 0.95 |
| ADAMTS5   | 11096  | -3.541 | 2.29E-80 | 0.939891 | -3.5519 | 2.30E-118 | 0.919743 | -3.527 | 6.01E-81 | 0.892857 | -3.647 | 6.34E-37 | 0.9  |
| CLEC3B    | 7123   | -3.428 | 6.29E-59 | 0.939891 | -3.8036 | 5.47E-103 | 0.956661 | -3.451 | 8.39E-67 | 0.944444 | -3.5   | 5.55E-17 | 1    |
| SVEP1     | 79987  | -3.408 | 3.17E-58 | 0.939891 | -3.6778 | 2.76E-82  | 0.914928 | -3.131 | 3.25E-54 | 0.876984 | -3.674 | 1.27E-19 | 0.95 |
| MAP1LC3C  | 440738 | -3.664 | 6.78E-55 | 0.939891 | -4.1603 | 1.17E-100 | 0.958266 | -3.867 | 3.73E-65 | 0.93254  | -4.472 | 1.74E-20 | 0.85 |
| PKHD1L1   | 93035  | -4.009 | 2.65E-46 | 0.939891 | -4.1699 | 3.55E-81  | 0.950241 | -4.066 | 6.90E-54 | 0.93254  | -3.912 | 1.37E-11 | 0.85 |
| NPY2R     | 4887   | -5.436 | 1.39E-44 | 0.939891 | -6.1143 | 1.10E-95  | 0.951846 | -5.832 | 4.99E-59 | 0.952381 | -5.819 | 2.28E-14 | 0.9  |
| FAM196B   | 1E+08  | -4.296 | 5.29E-44 | 0.939891 | -4.552  | 6.13E-79  | 0.953451 | -4.346 | 9.72E-52 | 0.964286 | -4.691 | 2.44E-13 | 0.95 |
| CDH20     | 28316  | -2.876 | 1.75E-40 | 0.939891 | -3.0373 | 1.05E-70  | 0.930979 | -3.241 | 2.10E-57 | 0.968254 | -3.18  | 1.81E-10 | 0.95 |
| MYBPC1    | 4604   | -3.361 | 6.64E-12 | 0.939891 | -3.9914 | 1.55E-21  | 0.934189 | -4.687 | 3.34E-24 | 0.944444 | -5.396 | 5.46E-07 | 0.9  |
| TNS1      | 7145   | -2.736 | 3.93E-67 | 0.934426 | -2.9229 | 6.03E-124 | 0.94061  | -2.73  | 4.49E-77 | 0.93254  | -2.993 | 6.42E-20 | 0.9  |
| B3GALT1   | 8708   | -3.444 | 3.18E-61 | 0.934426 | -3.5457 | 1.29E-99  | 0.9374   | -3.487 | 1.41E-64 | 0.912698 | -3.443 | 6.46E-16 | 0.9  |
| MASP1     | 5648   | -4.432 | 7.71E-60 | 0.934426 | -4.6159 | 1.73E-99  | 0.94382  | -4.456 | 4.37E-70 | 0.936508 | -5.54  | 3.97E-30 | 1    |
| ABCA9     | 10350  | -4.169 | 1.71E-58 | 0.934426 | -4.6705 | 5.22E-99  | 0.955056 | -4.015 | 2.37E-61 | 0.916667 | -5.076 | 3.06E-28 | 0.95 |
| PDK4      | 5166   | -3.684 | 2.98E-58 | 0.934426 | -4.0935 | 5.78E-86  | 0.94061  | -3.721 | 6.13E-57 | 0.904762 | -4.347 | 3.17E-25 | 1    |
| GDF10     | 2662   | -4.131 | 2.05E-56 | 0.934426 | -4.6728 | 4.20E-85  | 0.935795 | -4.277 | 5.04E-60 | 0.90873  | -4.548 | 1.85E-22 | 0.9  |
| CDO1      | 1036   | -3.623 | 3.02E-55 | 0.934426 | -4.1813 | 2.36E-83  | 0.927769 | -3.838 | 4.25E-60 | 0.928571 | -4.314 | 1.91E-21 | 0.95 |
| CD36      | 948    | -4.573 | 3.04E-53 | 0.934426 | -4.9711 | 1.23E-89  | 0.948636 | -4.552 | 3.25E-64 | 0.960317 | -4.806 | 1.98E-22 | 1    |
| GPX3      | 2878   | -3.356 | 1.39E-48 | 0.934426 | -3.5685 | 4.25E-90  | 0.950241 | -3.328 | 4.54E-53 | 0.904762 | -3.501 | 1.29E-13 | 1    |
| SPHKAP    | 80309  | -4.534 | 2.46E-43 | 0.934426 | -4.6017 | 7.08E-65  | 0.911717 | -4.942 | 4.23E-63 | 0.972222 | -5.236 | 6.93E-14 | 0.95 |
| SAA2      | 6289   | -4.464 | 1.43E-41 | 0.934426 | -4.9282 | 5.79E-57  | 0.930979 | -5.138 | 1.47E-49 | 0.928571 | -4.968 | 3.18E-17 | 1    |
| ALDH3A1   | 218    | -3.557 | 1.67E-38 | 0.934426 | -3.5437 | 5.43E-47  | 0.910112 | -3.659 | 2.82E-44 | 0.924603 | -4.12  | 3.47E-16 | 0.95 |
| CLDN19    | 149461 | -4.138 | 2.66E-37 | 0.934426 | -4.8161 | 2.34E-69  | 0.922953 | -4.387 | 8.47E-43 | 0.924603 | -5.032 | 5.80E-13 | 0.8  |
| SGCG      | 6445   | -3.824 | 1.43E-36 | 0.934426 | -4.1586 | 6.27E-66  | 0.94061  | -3.744 | 1.19E-38 | 0.90873  | -4.66  | 3.71E-14 | 1    |
| PROKR1    | 10887  | -2.364 | 5.02E-30 | 0.934426 | -2.4193 | 1.04E-55  | 0.930979 | -2.441 | 4.70E-39 | 0.936508 | -2.646 | 3.16E-08 | 1    |
| CSF3      | 1440   | -3.176 | 7.76E-28 | 0.934426 | -3.2231 | 1.24E-56  | 0.951846 | -3.209 | 7.85E-34 | 0.956349 | -3.728 | 3.54E-08 | 1    |
| DMD       | 1756   | -3.672 | 1.02E-73 | 0.928962 | -3.7947 | 2.83E-98  | 0.890851 | -3.89  | 8.12E-85 | 0.916667 | -4.147 | 5.54E-38 | 0.9  |
| FXD1      | 5348   | -4.712 | 2.96E-65 | 0.928962 | -5.3153 | 8.48E-98  | 0.942215 | -4.706 | 2.28E-63 | 0.904762 | -5.268 | 1.39E-37 | 1    |
| LOC728264 | 728264 | -3.712 | 1.57E-64 | 0.928962 | -3.934  | 1.17E-105 | 0.926164 | -3.597 | 4.59E-64 | 0.892857 | -3.92  | 7.02E-22 | 0.9  |
| TNXB      | 7148   | -4.124 | 8.86E-64 | 0.928962 | -4.6746 | 1.46E-115 | 0.969502 | -4.244 | 8.17E-70 | 0.948413 | -4.888 | 4.29E-30 | 0.95 |
| KLF15     | 28999  | -3.5   | 3.75E-61 | 0.928962 | -3.6691 | 9.12E-83  | 0.930979 | -3.638 | 1.75E-57 | 0.900794 | -3.811 | 1.07E-22 | 1    |
| ASPA      | 443    | -3.504 | 1.99E-58 | 0.928962 | -3.8764 | 8.96E-95  | 0.94703  | -3.727 | 3.07E-68 | 0.952381 | -3.687 | 2.59E-20 | 0.95 |
| ABC5      | 340273 | -4.304 | 3.17E-57 | 0.928962 | -4.8194 | 1.51E-109 | 0.964687 | -4.147 | 1.13E-57 | 0.880952 | -4.516 | 4.07E-18 | 0.85 |

|          |        |        |          |          |         |           |          |        |          |          |        |          |      |
|----------|--------|--------|----------|----------|---------|-----------|----------|--------|----------|----------|--------|----------|------|
| ACADL    | 33     | -4.582 | 2.02E-52 | 0.928962 | -4.9956 | 1.65E-77  | 0.934189 | -4.948 | 1.30E-62 | 0.924603 | -5.346 | 2.13E-23 | 0.95 |
| ABCA8    | 10351  | -4.634 | 2.93E-52 | 0.928962 | -5.4435 | 2.35E-76  | 0.950241 | -4.742 | 4.99E-57 | 0.940476 | -6.157 | 6.25E-31 | 0.95 |
| GPR109A  | 338442 | -3.038 | 8.58E-50 | 0.928962 | -3.2457 | 3.27E-83  | 0.921348 | -3.178 | 3.23E-56 | 0.90873  | -3.845 | 4.61E-19 | 1    |
| KY       | 339855 | -3.954 | 3.69E-47 | 0.928962 | -4.3319 | 8.68E-78  | 0.926164 | -4.211 | 1.08E-53 | 0.916667 | -4.543 | 6.43E-15 | 0.85 |
| PLXNA4   | 91584  | -2.999 | 3.04E-44 | 0.928962 | -3.2428 | 3.84E-66  | 0.900482 | -3.292 | 1.94E-48 | 0.928571 | -3.538 | 8.81E-14 | 0.95 |
| SGK2     | 10110  | -3.298 | 6.93E-41 | 0.928962 | -3.7538 | 5.46E-73  | 0.94382  | -3.694 | 3.53E-54 | 0.948413 | -3.876 | 2.30E-14 | 1    |
| SLC16A7  | 9194   | -3.097 | 5.82E-39 | 0.928962 | -3.2961 | 2.09E-73  | 0.9374   | -3.204 | 1.11E-52 | 0.948413 | -3.668 | 5.21E-14 | 0.95 |
| OVCH2    | 341277 | -3.089 | 2.60E-35 | 0.928962 | -3.3623 | 4.41E-78  | 0.922953 | -3.054 | 1.80E-38 | 0.904762 | -3.417 | 4.23E-09 | 0.95 |
| DLK1     | 8788   | -4.565 | 4.89E-30 | 0.928962 | -4.9063 | 4.82E-47  | 0.935795 | -4.792 | 5.42E-35 | 0.93254  | -4.722 | 4.23E-09 | 0.9  |
| LOC93432 | 93432  | -3     | 1.87E-27 | 0.928962 | -2.8318 | 2.71E-38  | 0.897271 | -3.231 | 7.01E-45 | 0.952381 | -2.896 | 5.03E-06 | 0.9  |
| KIAA1239 | 57495  | -2.994 | 3.12E-27 | 0.928962 | -3.4017 | 1.63E-56  | 0.94061  | -3.269 | 1.47E-38 | 0.936508 | -3.848 | 2.03E-10 | 1    |
| UGT2B28  | 54490  | -2.048 | 2.43E-06 | 0.928962 | -2.6089 | 5.94E-17  | 0.948636 | -2.347 | 1.17E-09 | 0.93254  | NA     | NA       | NA   |
| HIF3A    | 64344  | -5.007 | 3.12E-69 | 0.923497 | -5.2192 | 1.12E-105 | 0.94382  | -5.167 | 7.10E-75 | 0.936508 | -5.175 | 5.27E-33 | 0.95 |
| EBF1     | 1879   | -2.904 | 2.29E-63 | 0.923497 | -3.1337 | 2.25E-108 | 0.919743 | -2.894 | 6.40E-69 | 0.900794 | -3.048 | 5.73E-19 | 0.9  |
| GPIHBP1  | 338328 | -3.789 | 4.36E-62 | 0.923497 | -4.3009 | 7.84E-96  | 0.934189 | -3.731 | 2.54E-62 | 0.892857 | -3.644 | 4.40E-24 | 0.95 |
| FMO2     | 2327   | -4.127 | 6.24E-60 | 0.923497 | -4.5431 | 3.48E-81  | 0.908507 | -4.203 | 3.02E-62 | 0.884921 | -4.826 | 2.57E-32 | 0.95 |
| IGSF10   | 285313 | -3.803 | 5.13E-56 | 0.923497 | -4.0989 | 3.76E-84  | 0.913323 | -3.944 | 5.88E-68 | 0.90873  | -4.526 | 5.14E-27 | 0.85 |
| STAB2    | 55576  | -4.107 | 2.50E-52 | 0.923497 | -4.4759 | 1.08E-95  | 0.935795 | -4.006 | 1.25E-53 | 0.896825 | -4.76  | 2.83E-19 | 0.85 |
| GCOM1    | 145781 | -3.257 | 2.74E-51 | 0.923497 | -3.3518 | 2.63E-77  | 0.916533 | -3.12  | 1.24E-58 | 0.90873  | -3.156 | 6.92E-17 | 0.8  |
| NMUR1    | 10316  | -3.241 | 5.86E-49 | 0.923497 | -3.266  | 2.31E-77  | 0.914928 | -3.355 | 1.12E-57 | 0.940476 | -3.468 | 3.39E-14 | 1    |
| NNAT     | 4826   | -3.374 | 3.82E-45 | 0.923497 | -3.9508 | 2.00E-75  | 0.935795 | -3.779 | 1.05E-50 | 0.924603 | -4.091 | 6.17E-16 | 1    |
| TIMP4    | 7079   | -4.516 | 3.26E-44 | 0.923497 | -5.173  | 1.66E-77  | 0.969502 | -4.725 | 2.35E-52 | 0.968254 | -4.842 | 2.41E-15 | 1    |
| CLCA4    | 22802  | -4.166 | 1.06E-42 | 0.923497 | -4.3392 | 1.44E-70  | 0.916533 | -4.406 | 3.90E-52 | 0.912698 | -4.849 | 3.69E-13 | 0.95 |
| FGFBP2   | 83888  | -3.804 | 2.20E-39 | 0.923497 | -3.9386 | 9.18E-62  | 0.930979 | -3.981 | 2.09E-51 | 0.944444 | -4.049 | 6.60E-13 | 0.9  |
| KLHL30   | 377007 | -2.702 | 2.47E-34 | 0.923497 | -2.4689 | 9.53E-43  | 0.88764  | -2.339 | 1.61E-32 | 0.884921 | NA     | NA       | NA   |
| AADAC    | 13     | -3.668 | 3.69E-28 | 0.923497 | -3.9608 | 4.04E-65  | 0.971108 | -3.953 | 4.58E-42 | 0.980159 | -3.875 | 5.78E-07 | 0.95 |
| ITIH2    | 3698   | -3.356 | 2.51E-23 | 0.923497 | -3.6636 | 2.27E-46  | 0.9374   | -3.615 | 5.81E-31 | 0.936508 | -4.026 | 1.85E-07 | 0.95 |
| CAV1     | 857    | -3.247 | 4.15E-76 | 0.918033 | -3.4577 | 6.13E-133 | 0.94382  | -3.218 | 1.18E-84 | 0.944444 | -3.612 | 1.36E-27 | 1    |
| RYR3     | 6263   | -3.593 | 6.59E-75 | 0.918033 | -3.7182 | 2.46E-103 | 0.905297 | -3.692 | 1.13E-79 | 0.912698 | -4.264 | 3.36E-34 | 0.95 |
| ABCA10   | 10349  | -4.369 | 5.56E-69 | 0.918033 | -4.788  | 3.53E-112 | 0.945425 | -4.478 | 6.71E-70 | 0.912698 | -5.652 | 2.98E-37 | 0.95 |
| HPSE2    | 60495  | -4.482 | 6.53E-65 | 0.918033 | -4.7232 | 2.02E-110 | 0.939005 | -4.559 | 2.65E-70 | 0.920635 | -5.16  | 3.68E-28 | 0.95 |
| DPP6     | 1804   | -4.232 | 2.86E-59 | 0.918033 | -4.3911 | 1.70E-104 | 0.945425 | -4.409 | 6.36E-81 | 0.936508 | -3.922 | 1.43E-23 | 0.9  |
| AKR1C1   | 1645   | -4.219 | 5.39E-49 | 0.918033 | -4.5705 | 1.21E-72  | 0.932584 | -4.256 | 1.11E-55 | 0.920635 | -4.805 | 1.74E-20 | 1    |
| PPP1R1A  | 5502   | -4.259 | 5.61E-45 | 0.918033 | -4.8481 | 9.05E-64  | 0.935795 | -4.832 | 1.66E-50 | 0.936508 | -5.095 | 1.57E-19 | 0.95 |

|          |        |        |          |          |         |           |          |        |          |          |        |          |      |
|----------|--------|--------|----------|----------|---------|-----------|----------|--------|----------|----------|--------|----------|------|
| DCT      | 1638   | -3.127 | 2.27E-44 | 0.918033 | -3.3361 | 1.93E-90  | 0.959872 | -3.334 | 4.01E-59 | 0.944444 | -3.318 | 1.78E-13 | 0.85 |
| SAA1     | 6288   | -4.254 | 1.24E-43 | 0.918033 | -4.8639 | 6.68E-60  | 0.910112 | -4.934 | 3.79E-48 | 0.920635 | -4.831 | 1.46E-20 | 1    |
| CLEC4G   | 339390 | -3.222 | 8.88E-42 | 0.918033 | -3.4256 | 1.33E-79  | 0.930979 | -3.295 | 2.16E-50 | 0.944444 | -3.141 | 5.20E-10 | 0.9  |
| DPT      | 1805   | -3.388 | 1.04E-41 | 0.918033 | -3.5924 | 1.26E-66  | 0.9374   | -3.275 | 1.21E-47 | 0.920635 | -3.085 | 1.36E-11 | 0.85 |
| MMD      | 23531  | -2.175 | 7.19E-35 | 0.918033 | -2.1847 | 1.22E-67  | 0.894061 | -2.191 | 4.93E-40 | 0.888889 | -2.129 | 1.27E-06 | 0.95 |
| SLCO1A2  | 6579   | -3.626 | 1.45E-27 | 0.918033 | -3.8781 | 2.23E-56  | 0.9374   | -3.985 | 3.61E-42 | 0.940476 | -3.699 | 3.28E-07 | 0.85 |
| IGFBP1   | 3484   | -2.614 | 2.53E-21 | 0.918033 | -2.814  | 3.07E-46  | 0.932584 | -2.937 | 1.12E-35 | 0.956349 | -3.248 | 6.79E-07 | 0.95 |
| PROL1    | 58503  | -4.137 | 1.56E-20 | 0.918033 | -4.9772 | 2.59E-45  | 0.934189 | -4.502 | 1.63E-26 | 0.912698 | -6.419 | 3.09E-11 | 1    |
| NTS      | 4922   | -3.015 | 3.10E-17 | 0.918033 | -3.0653 | 1.00E-23  | 0.906902 | -3.093 | 1.08E-24 | 0.90873  | -3.626 | 4.57E-07 | 0.95 |
| SLC17A7  | 57030  | -3.306 | 6.09E-67 | 0.912568 | -3.447  | 2.56E-97  | 0.913323 | -3.142 | 1.89E-67 | 0.876984 | -3.315 | 9.18E-23 | 0.9  |
| MYH11    | 4629   | -3.93  | 9.14E-61 | 0.912568 | -4.4093 | 8.09E-83  | 0.913323 | -3.846 | 3.86E-59 | 0.873016 | -4.64  | 1.75E-30 | 0.9  |
| ANGPTL1  | 9068   | -3.688 | 2.46E-56 | 0.912568 | -3.9571 | 5.15E-91  | 0.922953 | -3.429 | 2.49E-61 | 0.865079 | -4.416 | 4.76E-26 | 0.9  |
| TMEM100  | 55273  | -3.655 | 3.43E-49 | 0.912568 | -4.1688 | 5.86E-77  | 0.930979 | -3.853 | 6.40E-57 | 0.924603 | -4.486 | 3.42E-24 | 0.95 |
| GRIA4    | 2893   | -4.518 | 4.00E-41 | 0.912568 | -5.0126 | 7.85E-71  | 0.930979 | -4.597 | 3.85E-43 | 0.90873  | -5.189 | 1.42E-13 | 0.9  |
| PKD1L2   | 114780 | -3.047 | 3.14E-39 | 0.912568 | -3.0958 | 5.82E-55  | 0.890851 | -3.286 | 2.18E-51 | 0.948413 | -2.899 | 4.99E-10 | 0.9  |
| BHMT2    | 23743  | -2.837 | 1.10E-37 | 0.912568 | -3.1244 | 5.05E-63  | 0.922953 | -2.837 | 1.71E-42 | 0.880952 | -3.176 | 1.57E-11 | 0.9  |
| MRGPRX2  | 117194 | -2.174 | 2.85E-37 | 0.912568 | -2.3002 | 7.96E-81  | 0.924559 | -2.179 | 7.98E-42 | 0.892857 | -2.259 | 7.46E-08 | 0.9  |
| DGAT2    | 84649  | -3.068 | 6.32E-36 | 0.912568 | -2.9766 | 1.41E-52  | 0.911717 | -3.12  | 1.47E-41 | 0.93254  | -3.186 | 2.81E-09 | 1    |
| PROK1    | 84432  | -2.151 | 9.03E-21 | 0.912568 | -2.1466 | 5.08E-28  | 0.910112 | NA     | NA       | NA       | NA     | NA       | NA   |
| PRG4     | 10216  | -2.126 | 1.41E-10 | 0.912568 | -2.8166 | 1.87E-23  | 0.924559 | -2.47  | 1.93E-14 | 0.924603 | -3.47  | 2.45E-05 | 1    |
| PAMR1    | 25891  | -3.856 | 8.00E-76 | 0.907104 | -4.2634 | 2.94E-125 | 0.935795 | -3.899 | 1.55E-84 | 0.928571 | -4.055 | 5.68E-32 | 0.85 |
| ATOH8    | 84913  | -3.691 | 7.47E-64 | 0.907104 | -3.9883 | 2.26E-107 | 0.926164 | -3.65  | 7.85E-64 | 0.865079 | -3.68  | 2.56E-26 | 0.9  |
| KCNB1    | 3745   | -3.986 | 1.88E-54 | 0.907104 | -4.1104 | 9.00E-78  | 0.916533 | -4.015 | 3.06E-57 | 0.892857 | -4.254 | 1.23E-24 | 0.95 |
| PPARG    | 5468   | -3.07  | 6.73E-51 | 0.907104 | -3.3113 | 1.94E-98  | 0.942215 | -3.127 | 3.71E-64 | 0.924603 | -3.436 | 2.14E-17 | 1    |
| GHR      | 2690   | -3.06  | 1.50E-49 | 0.907104 | -3.3069 | 1.26E-74  | 0.900482 | -2.979 | 2.36E-57 | 0.892857 | -3.536 | 5.37E-20 | 1    |
| CNN1     | 1264   | -3.279 | 1.46E-48 | 0.907104 | -3.6571 | 1.72E-81  | 0.911717 | -3.376 | 1.37E-56 | 0.900794 | -3.743 | 8.03E-17 | 0.9  |
| CLEC4GP1 | 440508 | -2.977 | 1.20E-47 | 0.907104 | -2.9843 | 2.61E-86  | 0.929374 | -2.831 | 2.65E-50 | 0.888889 | -2.82  | 9.28E-12 | 0.85 |
| ANGPT1   | 284    | -3.074 | 1.34E-46 | 0.907104 | -2.9863 | 2.23E-74  | 0.88443  | -3.083 | 1.73E-58 | 0.912698 | -3.045 | 3.86E-14 | 0.9  |
| CYP3A4   | 1576   | -2.191 | 3.46E-41 | 0.907104 | -2.1778 | 1.06E-76  | 0.892456 | -2.231 | 1.01E-49 | 0.912698 | -2.286 | 4.03E-10 | 0.9  |
| P2RX6    | 9127   | -2.659 | 3.51E-41 | 0.907104 | -2.4864 | 1.44E-50  | 0.869984 | -2.584 | 1.05E-42 | 0.869048 | -2.41  | 4.10E-09 | 0.95 |
| RNF186   | 54546  | -3.498 | 2.66E-40 | 0.907104 | -3.7907 | 2.10E-74  | 0.914928 | -3.604 | 1.31E-47 | 0.904762 | -3.629 | 1.37E-10 | 0.9  |
| SLC7A3   | 84889  | -3.725 | 7.53E-32 | 0.907104 | -4.1809 | 1.47E-60  | 0.906902 | -3.704 | 8.28E-32 | 0.853175 | -4.686 | 3.80E-11 | 0.9  |
| DSC1     | 1823   | -3.084 | 9.80E-31 | 0.907104 | -3.1761 | 1.32E-49  | 0.892456 | -3.042 | 7.47E-35 | 0.876984 | -3.032 | 1.14E-06 | 0.9  |
| RPE65    | 6121   | -2.059 | 1.06E-27 | 0.907104 | -2.1043 | 1.06E-50  | 0.916533 | -2.129 | 2.53E-36 | 0.928571 | -2.292 | 9.54E-07 | 0.9  |

|             |        |        |          |          |         |           |          |        |          |          |        |          |      |
|-------------|--------|--------|----------|----------|---------|-----------|----------|--------|----------|----------|--------|----------|------|
| AQP4        | 361    | -2.407 | 1.21E-22 | 0.907104 | -2.8144 | 1.20E-42  | 0.927769 | -3.147 | 2.73E-38 | 0.944444 | -3.203 | 4.08E-11 | 0.9  |
| TSLP        | 85480  | -3.929 | 1.06E-70 | 0.901639 | -4.2692 | 9.77E-99  | 0.905297 | -4.151 | 1.32E-71 | 0.888889 | -4.516 | 1.54E-40 | 0.85 |
| IGFBP6      | 3489   | -3.064 | 1.40E-60 | 0.901639 | -3.4227 | 3.84E-110 | 0.945425 | -3.118 | 7.47E-65 | 0.896825 | -3.039 | 1.55E-18 | 0.95 |
| NIPSNAP3B   | 55335  | -2.42  | 1.13E-55 | 0.901639 | -2.7377 | 1.51E-97  | 0.918138 | -2.763 | 1.68E-65 | 0.924603 | -3.029 | 2.43E-18 | 0.95 |
| CXCL2       | 2920   | -4.228 | 5.83E-55 | 0.901639 | -4.6335 | 3.79E-89  | 0.927769 | -4.799 | 1.49E-65 | 0.880952 | -5.496 | 8.67E-37 | 1    |
| LOC90586    | 90586  | -2.531 | 2.20E-50 | 0.901639 | -2.5761 | 1.08E-89  | 0.898876 | -2.362 | 5.90E-48 | 0.853175 | -2.638 | 9.55E-13 | 0.9  |
| CCDC3       | 83643  | -2.553 | 1.48E-49 | 0.901639 | -2.6133 | 8.68E-75  | 0.886035 | -2.537 | 1.74E-52 | 0.873016 | -2.703 | 1.79E-12 | 0.85 |
| TF          | 7018   | -4.153 | 5.25E-45 | 0.901639 | -4.6536 | 1.88E-51  | 0.863563 | -4.891 | 4.21E-55 | 0.90873  | -4.461 | 4.20E-20 | 0.8  |
| KCNE1       | 3753   | -3.698 | 9.58E-45 | 0.901639 | -4.1235 | 1.66E-75  | 0.913323 | -3.864 | 1.60E-49 | 0.869048 | -4.479 | 5.80E-17 | 0.85 |
| AKR1C2      | 1646   | -4.367 | 1.29E-43 | 0.901639 | -4.8268 | 1.36E-60  | 0.924559 | -4.432 | 8.87E-50 | 0.928571 | -4.894 | 3.86E-18 | 1    |
| DMGDH       | 29958  | -2.738 | 1.47E-42 | 0.901639 | -2.9799 | 1.36E-75  | 0.898876 | -2.858 | 2.96E-53 | 0.896825 | -3.124 | 1.32E-13 | 0.85 |
| PI16        | 221476 | -4.67  | 4.46E-40 | 0.901639 | -5.6245 | 3.72E-65  | 0.927769 | -5.082 | 8.18E-43 | 0.904762 | -6.232 | 7.98E-23 | 1    |
| C2orf84     | 653140 | -2.253 | 3.92E-38 | 0.901639 | -2.4194 | 4.97E-68  | 0.900482 | -2.441 | 1.40E-46 | 0.896825 | -2.111 | 1.51E-07 | 0.9  |
| C4BPA       | 722    | -3.769 | 1.77E-29 | 0.901639 | -3.9881 | 7.94E-45  | 0.879615 | -3.999 | 4.09E-38 | 0.916667 | -4.605 | 8.12E-11 | 0.85 |
| LOC10012469 | 1E+08  | -3.629 | 4.43E-28 | 0.901639 | -3.5529 | 1.68E-37  | 0.882825 | -4.09  | 6.02E-42 | 0.936508 | -3.812 | 1.94E-07 | 0.85 |
| PDE2A       | 5138   | -3.199 | 8.00E-76 | 0.896175 | -3.5541 | 3.86E-117 | 0.918138 | -3.171 | 7.71E-75 | 0.849206 | -3.435 | 1.21E-29 | 0.9  |
| ARHGAP20    | 57569  | -3.29  | 2.71E-68 | 0.896175 | -3.628  | 5.91E-108 | 0.924559 | -3.309 | 3.81E-76 | 0.896825 | -3.849 | 4.69E-30 | 0.95 |
| RERGL       | 79785  | -4.248 | 6.91E-54 | 0.896175 | -4.9676 | 8.25E-79  | 0.902087 | -4.353 | 8.18E-50 | 0.825397 | -5.62  | 6.82E-36 | 0.9  |
| VIT         | 5212   | -4.059 | 5.19E-53 | 0.896175 | -4.6273 | 1.56E-78  | 0.918138 | -4.378 | 3.57E-64 | 0.896825 | -5.084 | 1.70E-31 | 0.85 |
| ADH1C       | 126    | -4.586 | 2.00E-52 | 0.896175 | -5.4064 | 1.97E-83  | 0.924559 | -4.636 | 8.74E-59 | 0.900794 | -5.467 | 1.59E-29 | 0.9  |
| ADCYAP1R1   | 117    | -3.55  | 9.93E-52 | 0.896175 | -3.7608 | 1.02E-82  | 0.906902 | -3.618 | 4.89E-59 | 0.904762 | -3.851 | 1.88E-16 | 0.85 |
| C7orf58     | 79974  | -2.835 | 4.02E-44 | 0.896175 | -3.092  | 9.38E-75  | 0.911717 | -2.805 | 3.10E-49 | 0.892857 | -3.38  | 2.26E-16 | 0.95 |
| TMC2        | 117532 | -2.493 | 5.07E-42 | 0.896175 | -2.5564 | 9.34E-74  | 0.88443  | -2.522 | 1.16E-48 | 0.892857 | -2.813 | 4.75E-12 | 0.95 |
| HS3ST4      | 9951   | -4.183 | 9.58E-38 | 0.896175 | -4.6485 | 5.71E-69  | 0.916533 | -4.587 | 2.04E-52 | 0.944444 | -4.963 | 3.23E-13 | 0.95 |
| KBTBD12     | 166348 | -2.163 | 1.73E-19 | 0.896175 | -2.0711 | 2.27E-21  | 0.873194 | -2.507 | 4.66E-34 | 0.936508 | -2.499 | 6.46E-12 | 0.9  |
| CA6         | 765    | -2.836 | 7.09E-18 | 0.896175 | -2.8076 | 4.52E-29  | 0.905297 | -3.195 | 4.61E-34 | 0.928571 | -2.907 | 3.81E-05 | 0.9  |
| COL25A1     | 84570  | -3.181 | 5.03E-63 | 0.89071  | -3.3481 | 1.24E-83  | 0.897271 | -3.409 | 1.15E-63 | 0.884921 | -3.926 | 1.32E-26 | 0.9  |
| C10orf90    | 118611 | -4.315 | 2.02E-55 | 0.89071  | -4.4047 | 2.28E-71  | 0.87801  | -4.628 | 1.30E-70 | 0.924603 | -4.904 | 1.98E-25 | 0.9  |
| C2orf40     | 84417  | -4.695 | 1.43E-49 | 0.89071  | -5.4507 | 3.01E-79  | 0.905297 | -4.888 | 8.31E-57 | 0.876984 | -5.958 | 3.32E-34 | 0.9  |
| SAMD5       | 389432 | -3.322 | 2.19E-48 | 0.89071  | -3.645  | 1.01E-76  | 0.900482 | -3.431 | 5.73E-51 | 0.869048 | -3.771 | 4.83E-14 | 0.9  |
| NMNAT2      | 23057  | -3.132 | 9.62E-47 | 0.89071  | -2.9148 | 1.96E-50  | 0.826645 | -2.96  | 8.47E-44 | 0.813492 | -2.846 | 3.13E-14 | 0.8  |
| GPLD1       | 2822   | -3.132 | 1.22E-44 | 0.89071  | -3.0858 | 1.50E-63  | 0.88122  | -3.199 | 1.87E-51 | 0.900794 | -3.84  | 3.70E-18 | 1    |
| CFD         | 1675   | -3.529 | 4.96E-44 | 0.89071  | -3.7455 | 8.14E-63  | 0.879615 | -3.21  | 2.07E-41 | 0.845238 | -3.55  | 5.52E-15 | 0.95 |
| FOSB        | 2354   | -3.802 | 1.86E-40 | 0.89071  | -4.3154 | 2.75E-70  | 0.922953 | -4.265 | 6.27E-52 | 0.900794 | -5.65  | 1.18E-23 | 1    |

|           |        |        |          |          |         |           |          |        |          |          |        |          |      |
|-----------|--------|--------|----------|----------|---------|-----------|----------|--------|----------|----------|--------|----------|------|
| MLXIPL    | 51085  | -3.561 | 3.80E-38 | 0.89071  | -3.9294 | 9.46E-68  | 0.939005 | -3.687 | 5.63E-47 | 0.916667 | -3.416 | 1.02E-11 | 0.9  |
| THRSP     | 7069   | -3.766 | 9.36E-36 | 0.89071  | -4.2368 | 9.48E-43  | 0.866774 | -3.821 | 3.02E-37 | 0.857143 | -4.46  | 2.01E-17 | 0.95 |
| FAM150B   | 285016 | -3.598 | 1.32E-35 | 0.89071  | -3.8862 | 2.55E-56  | 0.894061 | -4.019 | 2.66E-54 | 0.904762 | -4.133 | 9.59E-15 | 0.8  |
| PAK7      | 57144  | -3.508 | 6.00E-32 | 0.89071  | -3.9512 | 2.12E-59  | 0.905297 | -3.686 | 1.02E-34 | 0.884921 | -4.869 | 6.42E-12 | 0.9  |
| PTPRQ     | 374462 | -3.63  | 8.14E-31 | 0.89071  | -3.6833 | 2.47E-44  | 0.894061 | -3.558 | 1.62E-34 | 0.892857 | -3.488 | 2.20E-08 | 0.9  |
| WIF1      | 11197  | -4.982 | 8.59E-31 | 0.89071  | -5.3769 | 4.89E-52  | 0.913323 | -5.249 | 1.42E-39 | 0.920635 | -4.751 | 3.20E-08 | 0.75 |
| CALB2     | 794    | -3.054 | 1.16E-29 | 0.89071  | -2.8676 | 1.73E-29  | 0.820225 | -3.041 | 4.36E-29 | 0.84127  | -2.483 | 9.38E-06 | 0.75 |
| LOC284578 | 284578 | -3.68  | 1.38E-54 | 0.885246 | -3.6331 | 9.18E-57  | 0.845907 | -4.018 | 4.37E-68 | 0.896825 | -4.04  | 4.11E-26 | 0.9  |
| CHL1      | 10752  | -3.856 | 4.30E-53 | 0.885246 | -4.2207 | 7.29E-75  | 0.898876 | -4.034 | 2.82E-64 | 0.916667 | -5.05  | 1.56E-28 | 0.9  |
| S100B     | 6285   | -4.103 | 3.80E-47 | 0.885246 | -4.5345 | 2.02E-64  | 0.87801  | -4.774 | 3.57E-68 | 0.944444 | -4.646 | 9.21E-26 | 0.95 |
| CES4      | 51716  | -3.437 | 6.43E-40 | 0.885246 | -3.5507 | 3.44E-63  | 0.905297 | -3.309 | 2.58E-44 | 0.888889 | -3.55  | 1.88E-12 | 0.95 |
| KIT       | 3815   | -3.294 | 2.64E-39 | 0.885246 | -3.6218 | 3.39E-63  | 0.879615 | -3.624 | 2.54E-48 | 0.90873  | -4.502 | 1.48E-17 | 0.95 |
| GPBAR1    | 151306 | -2.391 | 3.53E-36 | 0.885246 | -2.4799 | 1.07E-72  | 0.910112 | -2.278 | 2.21E-37 | 0.845238 | -2.341 | 5.32E-08 | 0.95 |
| EDN3      | 1908   | -4.218 | 2.44E-29 | 0.885246 | -4.7107 | 5.02E-49  | 0.88122  | -4.477 | 3.00E-32 | 0.869048 | -4.757 | 5.12E-09 | 0.85 |
| FAM3D     | 131177 | -3.475 | 7.52E-27 | 0.885246 | -3.4762 | 1.05E-33  | 0.858748 | -3.539 | 1.41E-29 | 0.884921 | -3.268 | 5.24E-06 | 0.75 |
| GSTA1     | 2938   | -3.788 | 5.05E-24 | 0.885246 | -3.5656 | 9.26E-26  | 0.815409 | -3.797 | 3.20E-28 | 0.861111 | -3.364 | 9.42E-06 | 0.8  |
| PIGR      | 5284   | -3.873 | 6.46E-19 | 0.885246 | -4.5084 | 4.09E-32  | 0.895666 | -4.001 | 1.88E-20 | 0.888889 | -3.463 | 0.000577 | 0.9  |
| ARHGAP36  | 158763 | -3.416 | 5.00E-15 | 0.885246 | -3.7603 | 8.15E-28  | 0.902087 | -3.669 | 3.82E-22 | 0.920635 | -3.759 | 9.84E-05 | 0.85 |
| MAMDC2    | 256691 | -3.668 | 1.60E-65 | 0.879781 | -4.1221 | 9.58E-87  | 0.900482 | -3.733 | 3.45E-70 | 0.873016 | -4.56  | 2.36E-40 | 0.9  |
| GPR146    | 115330 | -2.632 | 4.39E-65 | 0.879781 | -2.813  | 1.03E-121 | 0.900482 | -2.585 | 4.59E-66 | 0.813492 | -2.685 | 2.90E-18 | 0.9  |
| CAPN11    | 11131  | -3.311 | 1.15E-63 | 0.879781 | -3.471  | 1.76E-91  | 0.869984 | -3.053 | 7.16E-53 | 0.809524 | -3.283 | 2.42E-22 | 0.9  |
| SYNM      | 23336  | -4.064 | 1.82E-63 | 0.879781 | -4.2264 | 3.32E-90  | 0.88443  | -4.308 | 3.45E-72 | 0.900794 | -4.798 | 1.99E-32 | 0.95 |
| C2orf88   | 84281  | -3.081 | 9.26E-60 | 0.879781 | -3.1235 | 1.51E-76  | 0.834671 | -3.217 | 3.05E-72 | 0.865079 | -3.574 | 4.30E-26 | 0.75 |
| CRYAB     | 1410   | -3.899 | 9.59E-58 | 0.879781 | -4.0406 | 1.87E-66  | 0.865169 | -4.108 | 5.03E-65 | 0.896825 | -4.126 | 1.43E-26 | 0.9  |
| C18orf34  | 374864 | -3.343 | 4.67E-57 | 0.879781 | -3.8991 | 8.19E-97  | 0.905297 | -3.478 | 9.30E-58 | 0.845238 | -4.059 | 9.64E-30 | 0.9  |
| SCN3A     | 6328   | -3.604 | 6.92E-57 | 0.879781 | -4.1215 | 4.41E-86  | 0.906902 | -3.826 | 2.52E-61 | 0.884921 | -4.603 | 1.09E-27 | 0.85 |
| LRRN4CL   | 221091 | -3.438 | 1.24E-54 | 0.879781 | -3.9971 | 1.11E-92  | 0.927769 | -3.451 | 1.66E-60 | 0.857143 | -4.285 | 4.52E-26 | 0.9  |
| SLC6A2    | 6530   | -3.555 | 6.33E-49 | 0.879781 | -3.5254 | 1.23E-49  | 0.82504  | -3.774 | 4.23E-57 | 0.865079 | -3.834 | 3.00E-22 | 0.85 |
| COL6A6    | 131873 | -3.845 | 3.50E-46 | 0.879781 | -4.4438 | 6.66E-85  | 0.935795 | -4.182 | 1.22E-55 | 0.912698 | -4.814 | 1.00E-21 | 0.85 |
| PDE1C     | 5137   | -3.633 | 1.51E-45 | 0.879781 | -3.9219 | 3.49E-76  | 0.889246 | -3.963 | 5.28E-58 | 0.900794 | -4.324 | 1.79E-18 | 0.9  |
| MAOA      | 4128   | -3.496 | 6.18E-44 | 0.879781 | -4.0685 | 2.89E-71  | 0.918138 | -3.832 | 1.12E-58 | 0.888889 | -4.582 | 1.98E-24 | 1    |
| PAK3      | 5063   | -3.461 | 1.58E-41 | 0.879781 | -3.4398 | 3.34E-63  | 0.849117 | -3.655 | 3.83E-61 | 0.912698 | -4.078 | 2.45E-17 | 0.85 |
| MMRN1     | 22915  | -3.65  | 1.88E-40 | 0.879781 | -4.4078 | 3.55E-73  | 0.921348 | -3.59  | 2.51E-42 | 0.880952 | -4.213 | 7.85E-18 | 0.9  |
| PIK3C2G   | 5288   | -3.861 | 7.15E-28 | 0.879781 | -4.0829 | 1.86E-42  | 0.858748 | -3.757 | 1.35E-28 | 0.809524 | -4.105 | 2.74E-08 | 0.85 |

|         |        |        |          |          |         |           |          |        |          |          |        |          |      |
|---------|--------|--------|----------|----------|---------|-----------|----------|--------|----------|----------|--------|----------|------|
| SLC14A2 | 8170   | -2.62  | 6.59E-23 | 0.879781 | -3.0366 | 8.96E-44  | 0.894061 | -2.946 | 8.72E-35 | 0.90873  | -3.75  | 1.87E-11 | 1    |
| SMR3B   | 10879  | -2.075 | 3.27E-09 | 0.879781 | -2.5462 | 1.76E-21  | 0.919743 | -2.189 | 1.27E-11 | 0.892857 | -3.437 | 3.30E-06 | 1    |
| LEPR    | 3953   | -2.996 | 2.79E-61 | 0.874317 | -3.3113 | 6.95E-107 | 0.911717 | -3.048 | 2.18E-65 | 0.853175 | -3.364 | 1.90E-23 | 0.9  |
| DACT2   | 168002 | -4.037 | 1.74E-58 | 0.874317 | -4.3019 | 5.45E-80  | 0.890851 | -4.137 | 3.86E-59 | 0.876984 | -5.203 | 5.10E-31 | 0.95 |
| ANKRD53 | 79998  | -2.801 | 4.43E-54 | 0.874317 | -3.0042 | 1.61E-81  | 0.874799 | -2.893 | 5.15E-56 | 0.833333 | -2.856 | 8.57E-16 | 0.9  |
| SLC7A14 | 57709  | -2.737 | 6.51E-52 | 0.874317 | -2.851  | 1.51E-95  | 0.900482 | -2.782 | 8.86E-57 | 0.900794 | -2.765 | 7.91E-13 | 0.85 |
| HAS3    | 3038   | -3.403 | 1.67E-48 | 0.874317 | -3.4117 | 3.32E-77  | 0.88443  | -3.54  | 7.43E-64 | 0.928571 | -4.124 | 5.04E-19 | 0.95 |
| PLAC9   | 219348 | -3.112 | 1.51E-44 | 0.874317 | -3.6205 | 1.96E-74  | 0.905297 | -3.131 | 1.08E-45 | 0.845238 | -3.37  | 5.74E-17 | 0.95 |
| NRXN1   | 9378   | -3.426 | 2.70E-43 | 0.874317 | -3.5284 | 1.08E-44  | 0.839486 | -3.453 | 2.43E-39 | 0.809524 | -2.79  | 2.63E-10 | 0.7  |
| GRIN2B  | 2904   | -2.555 | 1.07E-42 | 0.874317 | -2.5457 | 2.17E-60  | 0.836276 | -2.743 | 4.62E-58 | 0.900794 | -2.567 | 2.21E-11 | 0.85 |
| MMP27   | 64066  | -2.695 | 1.41E-40 | 0.874317 | -3.0247 | 1.37E-78  | 0.916533 | -2.785 | 1.28E-45 | 0.869048 | -2.728 | 1.62E-09 | 0.75 |
| CAPZA3  | 93661  | -2.718 | 1.56E-40 | 0.874317 | -2.7375 | 2.77E-67  | 0.866774 | -2.743 | 1.47E-44 | 0.876984 | -2.696 | 3.10E-09 | 0.85 |
| IRX6    | 79190  | -3.369 | 1.29E-39 | 0.874317 | -3.2114 | 3.30E-46  | 0.842697 | -3.34  | 3.15E-40 | 0.861111 | -3.042 | 3.41E-10 | 0.75 |
| ANO3    | 63982  | -3.315 | 8.08E-31 | 0.874317 | -3.2257 | 1.40E-32  | 0.823435 | -2.962 | 3.95E-24 | 0.789683 | -2.468 | 6.13E-06 | 0.7  |
| SPINK5  | 11005  | -2.831 | 8.86E-27 | 0.874317 | -2.7425 | 1.28E-27  | 0.823435 | -2.755 | 2.14E-25 | 0.825397 | -2.259 | 6.26E-06 | 0.7  |
| CPA2    | 1358   | -2.007 | 1.21E-26 | 0.874317 | -2.0062 | 2.79E-42  | 0.861958 | -2.221 | 2.58E-43 | 0.924603 | -2.286 | 5.49E-08 | 1    |
| DSG1    | 1828   | -3.817 | 2.68E-26 | 0.874317 | -4.1151 | 1.96E-38  | 0.868379 | -4.284 | 1.32E-34 | 0.849206 | -4.753 | 6.89E-13 | 0.85 |
| FABP7   | 2173   | -3.721 | 7.42E-18 | 0.874317 | -3.4119 | 1.68E-16  | 0.784912 | -4.146 | 1.46E-25 | 0.857143 | -4.593 | 2.63E-08 | 0.85 |
| C6      | 729    | -2.606 | 5.40E-16 | 0.874317 | -3.7168 | 1.11E-36  | 0.914928 | -3.24  | 8.95E-23 | 0.869048 | -3.424 | 5.16E-07 | 0.95 |
| CAV2    | 858    | -2.869 | 5.45E-70 | 0.868852 | -3.0085 | 9.41E-113 | 0.874799 | -2.95  | 1.99E-83 | 0.892857 | -3.234 | 1.70E-26 | 0.9  |
| HOXA5   | 3202   | -3.137 | 3.39E-62 | 0.868852 | -3.2823 | 5.73E-85  | 0.826645 | -2.995 | 4.41E-66 | 0.805556 | -2.91  | 5.00E-30 | 0.8  |
| EBF3    | 253738 | -2.787 | 1.69E-56 | 0.868852 | -3.0488 | 7.45E-92  | 0.861958 | -2.832 | 2.69E-60 | 0.833333 | -3.135 | 4.83E-21 | 0.85 |
| FZD4    | 8322   | -2.276 | 8.21E-50 | 0.868852 | -2.4792 | 2.45E-83  | 0.855538 | -2.271 | 3.65E-56 | 0.84127  | -2.315 | 8.69E-12 | 0.95 |
| BMP5    | 653    | -3.958 | 5.41E-49 | 0.868852 | -3.7954 | 9.99E-47  | 0.847512 | -4.075 | 4.70E-53 | 0.865079 | -4.628 | 3.33E-25 | 0.9  |
| RHOXF1  | 158800 | -2.46  | 6.80E-40 | 0.868852 | -2.5521 | 1.27E-66  | 0.87801  | -2.495 | 1.06E-40 | 0.833333 | -2.217 | 2.12E-08 | 0.9  |
| MOSC1   | 64757  | -2.318 | 1.17E-37 | 0.868852 | -2.2503 | 4.24E-59  | 0.833066 | -2.174 | 3.83E-39 | 0.829365 | -2.352 | 1.34E-08 | 0.8  |
| TMEM37  | 140738 | -2.489 | 1.21E-36 | 0.868852 | -2.6259 | 2.25E-76  | 0.890851 | -2.481 | 2.09E-46 | 0.873016 | -2.403 | 1.74E-08 | 1    |
| CMTM5   | 116173 | -3.047 | 8.22E-36 | 0.868852 | -3.263  | 3.40E-57  | 0.871589 | -3.221 | 1.27E-48 | 0.869048 | -3.215 | 1.37E-13 | 0.85 |
| DRD2    | 1813   | -3.102 | 2.82E-32 | 0.868852 | -3.0509 | 2.46E-38  | 0.817014 | -3.082 | 3.31E-35 | 0.821429 | -3.574 | 1.37E-12 | 0.9  |
| APCDD1L | 164284 | -2.661 | 5.68E-28 | 0.868852 | -2.6198 | 3.12E-35  | 0.820225 | -2.787 | 6.15E-36 | 0.892857 | -2.565 | 4.82E-08 | 0.85 |
| SPOCK3  | 50859  | -2.313 | 2.42E-21 | 0.868852 | -2.5017 | 5.26E-37  | 0.860353 | -2.512 | 6.72E-28 | 0.833333 | -2.96  | 4.19E-08 | 0.95 |
| CDR1    | 1038   | -2.406 | 2.22E-20 | 0.868852 | -2.448  | 3.14E-34  | 0.871589 | -2.739 | 3.59E-33 | 0.93254  | -2.876 | 9.03E-08 | 0.95 |
| TMEM213 | 155006 | -3.16  | 2.69E-20 | 0.868852 | -2.895  | 1.52E-21  | 0.799358 | -3.221 | 3.66E-24 | 0.853175 | -2.481 | 0.000799 | 0.8  |
| AFP     | 174    | -3.045 | 3.00E-18 | 0.868852 | -3.1213 | 1.82E-25  | 0.834671 | -2.655 | 4.18E-14 | 0.797619 | -2.389 | 0.002259 | 0.8  |

|           |        |        |          |          |         |           |          |        |          |          |        |          |      |
|-----------|--------|--------|----------|----------|---------|-----------|----------|--------|----------|----------|--------|----------|------|
| LMOD1     | 25802  | -2.991 | 1.13E-72 | 0.863388 | -3.1787 | 1.00E-95  | 0.845907 | -2.81  | 1.60E-70 | 0.781746 | -3.137 | 9.45E-34 | 0.9  |
| NKAPL     | 222698 | -2.761 | 7.22E-70 | 0.863388 | -2.9019 | 1.34E-114 | 0.873194 | -2.698 | 3.88E-80 | 0.845238 | -2.836 | 8.41E-31 | 0.9  |
| ALDH1A2   | 8854   | -3.638 | 1.06E-59 | 0.863388 | -4.1224 | 5.40E-90  | 0.900482 | -3.717 | 7.52E-60 | 0.849206 | -4.483 | 1.07E-33 | 0.9  |
| C1QTNF9   | 338872 | -3.201 | 1.07E-57 | 0.863388 | -3.5273 | 1.95E-91  | 0.892456 | -3.323 | 7.61E-64 | 0.857143 | -3.143 | 8.76E-23 | 0.85 |
| FREM1     | 158326 | -3.713 | 8.48E-49 | 0.863388 | -4.1443 | 1.97E-76  | 0.902087 | -3.726 | 1.36E-52 | 0.873016 | -5.115 | 2.58E-29 | 0.9  |
| RELN      | 5649   | -4.383 | 4.00E-48 | 0.863388 | -5.0516 | 7.48E-83  | 0.929374 | -4.601 | 6.69E-56 | 0.900794 | -5.276 | 1.42E-26 | 0.95 |
| C14orf139 | 79686  | -2.517 | 1.71E-47 | 0.863388 | -2.9776 | 3.97E-96  | 0.906902 | -2.887 | 6.02E-60 | 0.888889 | -2.818 | 2.63E-14 | 0.9  |
| C3orf55   | 152078 | -3.227 | 1.25E-44 | 0.863388 | -3.282  | 9.20E-65  | 0.879615 | -3.369 | 4.96E-54 | 0.900794 | -3.67  | 5.38E-17 | 0.95 |
| GFAP      | 2670   | -3.7   | 2.27E-44 | 0.863388 | -4.1215 | 1.34E-68  | 0.892456 | -3.849 | 1.21E-48 | 0.869048 | -4.068 | 1.65E-17 | 0.9  |
| GALNTL2   | 117248 | -3.098 | 3.26E-44 | 0.863388 | -3.527  | 7.26E-82  | 0.902087 | -3.281 | 1.68E-57 | 0.884921 | -3.84  | 3.04E-20 | 0.95 |
| CLDND2    | 125875 | -2.557 | 7.04E-44 | 0.863388 | -2.5572 | 8.50E-74  | 0.861958 | -2.524 | 3.34E-50 | 0.833333 | -2.235 | 1.22E-09 | 0.7  |
| PLD5      | 200150 | -2.959 | 3.76E-39 | 0.863388 | -3.199  | 1.23E-70  | 0.87801  | -3.313 | 9.28E-61 | 0.892857 | -3.077 | 8.01E-17 | 0.85 |
| SCN2A     | 6326   | -3.165 | 2.08E-35 | 0.863388 | -3.4083 | 3.07E-50  | 0.853933 | -3.254 | 3.10E-40 | 0.837302 | -3.783 | 4.26E-13 | 0.85 |
| MYEOV     | 26579  | -3.459 | 2.47E-32 | 0.863388 | -3.2557 | 3.81E-35  | 0.807384 | -3.332 | 8.55E-36 | 0.869048 | -2.537 | 5.52E-06 | 0.7  |
| SYN2      | 6854   | -3.752 | 5.47E-58 | 0.857923 | -4.1205 | 6.16E-68  | 0.836276 | -3.949 | 3.04E-49 | 0.81746  | -4.078 | 2.50E-25 | 0.8  |
| NTRK2     | 4915   | -3.756 | 7.81E-58 | 0.857923 | -4.2714 | 5.81E-81  | 0.889246 | -4.196 | 2.33E-65 | 0.888889 | -4.946 | 2.81E-39 | 0.85 |
| BMX       | 660    | -3.363 | 1.67E-51 | 0.857923 | -3.9382 | 4.00E-82  | 0.87801  | -3.324 | 4.86E-49 | 0.789683 | -4.101 | 3.20E-28 | 0.9  |
| RNF150    | 57484  | -3.225 | 7.27E-48 | 0.857923 | -3.1966 | 3.70E-70  | 0.857143 | -3.276 | 5.60E-67 | 0.884921 | -3.708 | 3.74E-20 | 0.85 |
| NLGN1     | 22871  | -3.324 | 1.36E-43 | 0.857923 | -3.5845 | 2.66E-61  | 0.836276 | -3.484 | 8.06E-50 | 0.845238 | -4.074 | 1.91E-25 | 0.9  |
| D4S234E   | 27065  | -3.136 | 1.13E-41 | 0.857923 | -3.5258 | 9.70E-59  | 0.841091 | -3.308 | 8.71E-45 | 0.809524 | -3.81  | 3.95E-17 | 0.9  |
| CNTFR     | 1271   | -3.934 | 1.84E-41 | 0.857923 | -4.1856 | 3.95E-49  | 0.834671 | -3.854 | 5.90E-35 | 0.789683 | -4.549 | 4.02E-22 | 1    |
| C11orf87  | 399947 | -2.184 | 8.27E-39 | 0.857923 | -2.1327 | 5.64E-61  | 0.847512 | -2.143 | 3.27E-39 | 0.880952 | NA     | NA       | NA   |
| ACTG2     | 72     | -3.377 | 2.38E-34 | 0.857923 | -3.7112 | 1.37E-45  | 0.847512 | -3.893 | 5.84E-44 | 0.888889 | -3.914 | 8.11E-14 | 0.85 |
| XPNPEP2   | 7512   | -3.009 | 4.89E-34 | 0.857923 | -3.3793 | 1.36E-62  | 0.897271 | -3.066 | 1.01E-40 | 0.880952 | -3.404 | 7.26E-14 | 0.95 |
| NEUROG2   | 63973  | -3.153 | 2.42E-28 | 0.857923 | -3.2208 | 5.08E-41  | 0.863563 | -3.297 | 5.31E-36 | 0.900794 | -3.425 | 2.35E-09 | 0.9  |
| GRIA1     | 2890   | -3.248 | 6.29E-27 | 0.857923 | -3.4875 | 2.62E-34  | 0.857143 | -3.382 | 3.14E-36 | 0.876984 | -3.895 | 1.12E-16 | 0.95 |
| PTN       | 5764   | -2.82  | 3.77E-26 | 0.857923 | -3.2334 | 1.27E-47  | 0.866774 | -2.975 | 7.24E-29 | 0.849206 | -3.853 | 5.15E-10 | 0.9  |
| GRIK1     | 2897   | -2.831 | 7.92E-21 | 0.857923 | -3.2876 | 2.98E-49  | 0.911717 | -3.14  | 1.04E-30 | 0.896825 | -3.025 | 6.15E-07 | 0.8  |
| GLRA3     | 8001   | -2.788 | 7.54E-11 | 0.857923 | -2.8547 | 3.45E-17  | 0.858748 | -2.348 | 1.29E-08 | 0.793651 | -2.978 | 0.001111 | 0.85 |
| SLC26A3   | 1811   | -2.279 | 6.23E-09 | 0.857923 | -2.9937 | 9.48E-21  | 0.882825 | -2.714 | 7.28E-14 | 0.876984 | -3.554 | 2.33E-05 | 0.9  |
| MEOX2     | 4223   | -3.159 | 1.78E-56 | 0.852459 | -3.6425 | 3.06E-73  | 0.853933 | -3.065 | 1.89E-56 | 0.785714 | -3.609 | 1.39E-29 | 0.95 |
| PRRG3     | 79057  | -2.933 | 5.68E-52 | 0.852459 | -3.1779 | 1.18E-92  | 0.87801  | -3.158 | 4.58E-73 | 0.90873  | -3.39  | 3.92E-25 | 0.95 |
| CCL14     | 6358   | -3.546 | 3.77E-51 | 0.852459 | -4.3878 | 1.79E-72  | 0.871589 | -3.627 | 8.46E-50 | 0.821429 | -3.824 | 7.74E-28 | 0.85 |
| KLHL13    | 90293  | -3.347 | 6.10E-49 | 0.852459 | -3.3688 | 6.63E-65  | 0.853933 | -3.21  | 4.53E-44 | 0.801587 | -4.047 | 1.15E-18 | 0.85 |



|          |        |        |          |          |         |           |          |        |          |          |        |          |      |
|----------|--------|--------|----------|----------|---------|-----------|----------|--------|----------|----------|--------|----------|------|
| SAA4     | 6291   | -3.459 | 2.15E-43 | 0.852459 | -3.438  | 2.30E-50  | 0.817014 | -3.703 | 2.27E-50 | 0.84127  | -3.802 | 1.09E-19 | 0.85 |
| TMEM195  | 392636 | -2.984 | 8.62E-42 | 0.852459 | -3.1858 | 4.21E-72  | 0.900482 | -2.978 | 1.96E-45 | 0.853175 | -3.542 | 1.88E-17 | 0.9  |
| GPR133   | 283383 | -2.786 | 4.68E-39 | 0.852459 | -3.078  | 3.87E-58  | 0.836276 | -2.691 | 5.20E-38 | 0.765873 | -3.591 | 4.82E-16 | 0.95 |
| RNASE7   | 84659  | -3.134 | 4.06E-35 | 0.852459 | -3.4387 | 7.23E-57  | 0.853933 | -3.206 | 2.03E-38 | 0.829365 | -3.903 | 7.31E-13 | 0.85 |
| DMRT2    | 10655  | -2.754 | 8.21E-35 | 0.852459 | -2.9965 | 3.73E-57  | 0.850722 | -2.952 | 5.25E-46 | 0.876984 | -3.259 | 1.10E-13 | 0.85 |
| KCNA2    | 3737   | -2.395 | 7.85E-33 | 0.852459 | -2.4614 | 9.79E-57  | 0.87801  | -2.508 | 2.01E-44 | 0.884921 | -2.705 | 5.84E-10 | 0.85 |
| CCDC141  | 285025 | -2.275 | 1.32E-32 | 0.852459 | -2.4768 | 2.03E-61  | 0.910112 | -2.451 | 6.24E-43 | 0.884921 | -2.859 | 1.16E-13 | 0.9  |
| DKK4     | 27121  | -2.049 | 1.20E-30 | 0.852459 | NA      | NA        | NA       | -2.018 | 4.26E-36 | 0.813492 | -2.447 | 9.06E-12 | 0.95 |
| CLDN10   | 9071   | -2.83  | 1.74E-26 | 0.852459 | -2.8158 | 1.64E-27  | 0.817014 | -3.16  | 1.30E-34 | 0.873016 | -3.476 | 5.25E-12 | 0.85 |
| RASGEF1C | 255426 | -2.801 | 1.47E-25 | 0.852459 | -2.6821 | 3.50E-31  | 0.805778 | -3.143 | 1.11E-43 | 0.892857 | -2.949 | 4.76E-09 | 0.8  |
| LIFR     | 3977   | -2.862 | 3.06E-68 | 0.846995 | -3.0362 | 4.76E-90  | 0.834671 | -2.96  | 7.17E-67 | 0.801587 | -3.379 | 2.65E-32 | 0.95 |
| PALMD    | 54873  | -2.753 | 4.11E-67 | 0.846995 | -3.0125 | 4.76E-104 | 0.879615 | -2.867 | 3.36E-72 | 0.865079 | -2.996 | 1.32E-23 | 0.9  |
| FAM107A  | 11170  | -3.573 | 1.22E-58 | 0.846995 | -3.9552 | 4.56E-77  | 0.873194 | -3.766 | 8.14E-62 | 0.861111 | -4.289 | 1.44E-31 | 0.9  |
| FGF2     | 2247   | -3.194 | 5.05E-52 | 0.846995 | -3.6519 | 2.66E-77  | 0.857143 | -3.563 | 1.04E-63 | 0.869048 | -4.385 | 9.45E-34 | 0.95 |
| AVPR2    | 554    | -2.998 | 1.78E-50 | 0.846995 | -3.4475 | 4.24E-79  | 0.857143 | -3.017 | 8.74E-45 | 0.738095 | -3.181 | 4.25E-22 | 0.8  |
| CCDC69   | 26112  | -2.619 | 1.00E-49 | 0.846995 | -2.8758 | 4.56E-86  | 0.88764  | -2.703 | 4.53E-58 | 0.869048 | -3.073 | 1.41E-16 | 0.9  |
| SFRP1    | 6422   | -4.455 | 2.68E-45 | 0.846995 | -4.8283 | 3.59E-53  | 0.82183  | -4.946 | 2.37E-49 | 0.857143 | -5.85  | 1.59E-27 | 0.8  |
| EPHB1    | 2047   | -3.01  | 9.21E-42 | 0.846995 | -3.0125 | 6.77E-58  | 0.81862  | -3.194 | 4.63E-56 | 0.888889 | -3.463 | 4.21E-15 | 0.85 |
| HTR2A    | 3356   | -2.961 | 2.16E-38 | 0.846995 | -3.1552 | 3.10E-60  | 0.874799 | -3.121 | 1.75E-47 | 0.884921 | -3.527 | 7.41E-14 | 0.9  |
| TEPP     | 374739 | -2.376 | 1.34E-35 | 0.846995 | -2.5319 | 1.10E-62  | 0.866774 | -2.35  | 4.43E-36 | 0.813492 | -2.408 | 4.62E-08 | 0.8  |
| CMA1     | 1215   | -3.416 | 2.35E-35 | 0.846995 | -3.8423 | 7.83E-63  | 0.876404 | -3.61  | 5.81E-42 | 0.853175 | -4.373 | 1.14E-15 | 0.9  |
| CD209    | 30835  | -2.802 | 4.41E-35 | 0.846995 | -2.7397 | 1.35E-53  | 0.844302 | -2.616 | 1.58E-38 | 0.821429 | -2.684 | 1.36E-09 | 0.95 |
| FGFBP1   | 9982   | -4.173 | 6.32E-34 | 0.846995 | -4.1666 | 2.01E-40  | 0.823435 | -4.647 | 3.39E-49 | 0.892857 | -5.307 | 7.45E-19 | 0.9  |
| ALX4     | 60529  | -3.052 | 1.22E-33 | 0.846995 | -3.1857 | 9.02E-50  | 0.845907 | -3.125 | 3.28E-38 | 0.849206 | -3.576 | 4.12E-12 | 0.85 |
| GABRA2   | 2555   | -2.66  | 1.25E-30 | 0.846995 | -2.8632 | 3.45E-41  | 0.836276 | -2.866 | 1.16E-36 | 0.84127  | -2.87  | 7.66E-10 | 0.85 |
| LMX1A    | 4009   | -2.376 | 7.34E-28 | 0.846995 | -2.5562 | 6.51E-49  | 0.869984 | -2.543 | 4.53E-36 | 0.857143 | -2.704 | 9.28E-09 | 0.85 |
| TTYH1    | 57348  | -3.421 | 3.02E-27 | 0.846995 | -3.1753 | 5.96E-27  | 0.810594 | -3.549 | 2.32E-38 | 0.873016 | -3.773 | 8.37E-12 | 0.85 |
| IL6      | 3569   | -2.844 | 5.64E-23 | 0.846995 | -3.1711 | 2.35E-39  | 0.855538 | -3.109 | 2.22E-31 | 0.876984 | -3.827 | 2.69E-11 | 0.95 |
| OLFM4    | 10562  | -3.801 | 3.61E-20 | 0.846995 | -4.0418 | 6.81E-26  | 0.834671 | -4.112 | 5.65E-27 | 0.837302 | -5.036 | 8.38E-12 | 0.85 |
| CITED1   | 4435   | -2.67  | 4.03E-19 | 0.846995 | -2.8808 | 6.01E-29  | 0.812199 | -2.778 | 6.73E-22 | 0.805556 | -2.876 | 3.76E-06 | 0.8  |
| COL17A1  | 1308   | -3.438 | 1.82E-18 | 0.846995 | -4.2492 | 1.41E-37  | 0.869984 | -3.635 | 6.14E-21 | 0.809524 | -5.015 | 3.07E-08 | 0.85 |
| MUCL1    | 118430 | -3.45  | 2.41E-10 | 0.846995 | -3.9755 | 3.46E-17  | 0.823435 | -3.464 | 1.61E-11 | 0.809524 | -3.734 | 0.002063 | 0.8  |
| PLA2G2A  | 5320   | -2.225 | 4.55E-10 | 0.846995 | -2.703  | 5.72E-16  | 0.82504  | -2.469 | 8.33E-12 | 0.789683 | -3.042 | 6.75E-05 | 0.9  |
| LRRTM2   | 26045  | -2.94  | 6.39E-62 | 0.84153  | -3.1289 | 3.36E-95  | 0.874799 | -2.907 | 8.06E-68 | 0.833333 | -3.427 | 5.49E-29 | 0.9  |

|           |        |        |          |          |         |           |          |        |          |          |        |          |      |
|-----------|--------|--------|----------|----------|---------|-----------|----------|--------|----------|----------|--------|----------|------|
| PGM5      | 5239   | -3.009 | 6.00E-61 | 0.84153  | -3.4957 | 2.90E-74  | 0.817014 | -2.945 | 9.65E-54 | 0.742063 | -3.107 | 1.28E-26 | 0.75 |
| SIK2      | 23235  | -2.194 | 6.58E-61 | 0.84153  | -2.2308 | 4.05E-106 | 0.810594 | -2.245 | 7.44E-71 | 0.813492 | -2.422 | 1.87E-17 | 0.9  |
| HLF       | 3131   | -3.407 | 1.15E-56 | 0.84153  | -3.8769 | 6.79E-83  | 0.866774 | -3.822 | 6.56E-64 | 0.865079 | -3.665 | 6.84E-30 | 0.9  |
| NRG2      | 9542   | -3.776 | 1.37E-51 | 0.84153  | -3.8553 | 3.04E-66  | 0.820225 | -3.932 | 1.49E-55 | 0.865079 | -4.047 | 4.12E-23 | 0.7  |
| LRRN3     | 54674  | -2.741 | 2.48E-42 | 0.84153  | -2.9832 | 4.28E-58  | 0.852327 | -2.912 | 1.26E-49 | 0.821429 | -2.905 | 3.46E-13 | 0.8  |
| ART4      | 420    | -2.753 | 1.98E-37 | 0.84153  | -2.9357 | 2.47E-51  | 0.850722 | -2.839 | 6.04E-48 | 0.84127  | -3.151 | 5.33E-14 | 0.9  |
| LPPR1     | 54886  | -3.356 | 3.48E-36 | 0.84153  | -3.4054 | 2.06E-50  | 0.829856 | -3.348 | 2.31E-38 | 0.809524 | -3.759 | 6.28E-13 | 0.85 |
| FLNC      | 2318   | -2.008 | 3.77E-26 | 0.84153  | -2.2612 | 1.12E-41  | 0.88764  | NA     | NA       | NA       | -2.191 | 2.56E-11 | 0.85 |
| PI3       | 5266   | -3.55  | 3.89E-24 | 0.84153  | -3.2395 | 3.65E-22  | 0.76886  | -3.783 | 2.33E-29 | 0.873016 | -4.385 | 2.73E-12 | 0.9  |
| C8orf34   | 116328 | -2.31  | 8.10E-22 | 0.84153  | -2.646  | 3.72E-39  | 0.842697 | -2.532 | 4.88E-33 | 0.853175 | -2.951 | 4.79E-12 | 0.9  |
| NTF4      | 4909   | -2.536 | 3.26E-21 | 0.84153  | -2.8384 | 9.59E-39  | 0.807384 | -2.681 | 1.62E-22 | 0.769841 | -2.928 | 5.24E-06 | 0.85 |
| NROB1     | 190    | -2.007 | 4.30E-20 | 0.84153  | NA      | NA        | NA       | NA     | NA       | NA       | -2.473 | 1.60E-10 | 0.95 |
| C5orf23   | 79614  | -2.098 | 2.14E-19 | 0.84153  | -2.1365 | 3.56E-26  | 0.791332 | -2.05  | 1.02E-20 | 0.813492 | -2.434 | 5.00E-06 | 0.8  |
| ROPN1B    | 152015 | -3.242 | 2.30E-19 | 0.84153  | -3.2114 | 7.07E-23  | 0.797753 | -3.726 | 5.14E-31 | 0.880952 | -3.906 | 2.47E-08 | 0.8  |
| RSPO3     | 84870  | -2.929 | 3.05E-51 | 0.836066 | -3.0618 | 4.72E-73  | 0.837881 | -2.943 | 2.86E-57 | 0.821429 | -3.033 | 1.98E-22 | 0.9  |
| PDZD2     | 23037  | -2.576 | 3.89E-46 | 0.836066 | -2.7407 | 1.51E-72  | 0.815409 | -2.643 | 1.39E-50 | 0.793651 | -3.051 | 3.84E-17 | 0.8  |
| SHISA3    | 152573 | -2.741 | 7.77E-40 | 0.836066 | -2.9446 | 9.52E-58  | 0.842697 | -2.714 | 1.49E-32 | 0.769841 | -2.961 | 2.54E-12 | 0.9  |
| MUSTN1    | 389125 | -2.099 | 4.52E-34 | 0.836066 | -2.3257 | 2.32E-51  | 0.874799 | NA     | NA       | NA       | -2.615 | 7.27E-15 | 0.9  |
| LILRB5    | 10990  | -2.672 | 8.95E-30 | 0.836066 | -2.5534 | 9.63E-44  | 0.839486 | -2.38  | 2.94E-29 | 0.81746  | -2.387 | 1.09E-06 | 0.85 |
| LOC286002 | 286002 | -2.49  | 1.52E-23 | 0.836066 | -2.3689 | 1.39E-28  | 0.783307 | -2.665 | 1.79E-30 | 0.84127  | -2.232 | 1.80E-05 | 0.65 |
| CFTR      | 1080   | -2.049 | 2.44E-16 | 0.836066 | NA      | NA        | NA       | NA     | NA       | NA       | NA     | NA       | NA   |
| KLK5      | 25818  | -3.301 | 4.52E-15 | 0.836066 | -3.52   | 1.47E-19  | 0.788122 | -3.568 | 1.47E-17 | 0.825397 | -5.525 | 2.76E-09 | 0.9  |
| HOXA4     | 3201   | -2.862 | 8.97E-73 | 0.830601 | -2.9796 | 1.56E-85  | 0.789727 | -2.714 | 4.03E-69 | 0.761905 | -2.831 | 1.34E-35 | 0.85 |
| ENPP2     | 5168   | -2.956 | 8.82E-57 | 0.830601 | -3.2162 | 4.91E-87  | 0.844302 | -2.997 | 1.01E-61 | 0.81746  | -3.121 | 1.85E-22 | 0.9  |
| SEMA3G    | 56920  | -2.653 | 3.99E-52 | 0.830601 | -3.0678 | 2.84E-83  | 0.866774 | -2.789 | 5.16E-59 | 0.837302 | -3.301 | 4.12E-22 | 0.9  |
| SLC22A3   | 6581   | -3.352 | 1.30E-45 | 0.830601 | -3.5775 | 1.54E-67  | 0.871589 | -3.386 | 9.58E-55 | 0.865079 | -3.655 | 5.61E-21 | 0.95 |
| ZBTB16    | 7704   | -4.059 | 5.57E-42 | 0.830601 | -4.7923 | 4.36E-68  | 0.903692 | -4.384 | 4.56E-49 | 0.876984 | -5.084 | 1.22E-28 | 1    |
| CNKSR2    | 22866  | -3.033 | 2.63E-40 | 0.830601 | -3.0425 | 2.43E-53  | 0.826645 | -3.227 | 5.00E-53 | 0.845238 | -3.645 | 1.71E-17 | 0.8  |
| SLC16A12  | 387700 | -3.185 | 9.16E-40 | 0.830601 | -3.4709 | 3.94E-65  | 0.866774 | -3.112 | 9.69E-46 | 0.813492 | -3.51  | 9.14E-20 | 0.95 |
| ELANE     | 1991   | -2.26  | 2.77E-38 | 0.830601 | -2.3508 | 9.10E-62  | 0.826645 | -2.132 | 2.02E-36 | 0.793651 | -2.521 | 2.19E-12 | 0.8  |
| ACSL1     | 2180   | -2.362 | 2.48E-36 | 0.830601 | -2.4077 | 2.45E-63  | 0.868379 | -2.336 | 9.63E-45 | 0.857143 | -2.441 | 1.10E-09 | 0.95 |
| DLK2      | 65989  | -2.787 | 2.71E-28 | 0.830601 | -3.0619 | 1.57E-45  | 0.826645 | -2.928 | 8.37E-31 | 0.777778 | -3.597 | 8.74E-10 | 0.85 |
| PTCHD3    | 374308 | -2.783 | 1.23E-26 | 0.830601 | -2.8015 | 2.17E-36  | 0.82183  | -2.826 | 1.31E-30 | 0.837302 | -3.507 | 1.62E-13 | 0.95 |
| BBOX1     | 8424   | -3.578 | 9.70E-26 | 0.830601 | -3.8517 | 4.17E-34  | 0.781701 | -3.873 | 6.71E-30 | 0.813492 | -4.267 | 1.94E-10 | 0.75 |

|          |        |        |          |          |         |          |          |        |          |          |        |          |      |
|----------|--------|--------|----------|----------|---------|----------|----------|--------|----------|----------|--------|----------|------|
| MYO16    | 23026  | -2.261 | 3.06E-25 | 0.830601 | -2.2455 | 4.03E-30 | 0.781701 | -2.399 | 9.81E-28 | 0.809524 | -2.727 | 1.44E-08 | 0.85 |
| SLC4A4   | 8671   | -2.776 | 7.90E-24 | 0.830601 | -3.2063 | 1.19E-45 | 0.897271 | -3.11  | 9.67E-35 | 0.888889 | -3.619 | 2.96E-13 | 0.95 |
| CDH4     | 1002   | -2.252 | 9.01E-24 | 0.830601 | -2.3387 | 1.43E-38 | 0.836276 | -2.418 | 3.75E-36 | 0.880952 | -2.415 | 5.64E-08 | 0.85 |
| CHST9    | 83539  | -3.206 | 2.19E-23 | 0.830601 | -3.537  | 2.49E-36 | 0.82183  | -3.397 | 3.97E-29 | 0.857143 | -3.816 | 8.45E-08 | 0.8  |
| ATP13A5  | 344905 | -3.239 | 2.74E-18 | 0.830601 | -3.4113 | 2.55E-25 | 0.799358 | -3.347 | 1.41E-17 | 0.769841 | -3.277 | 4.87E-05 | 0.75 |
| B3GAT1   | 27087  | -2.283 | 2.55E-17 | 0.830601 | -2.3318 | 4.08E-23 | 0.791332 | -2.414 | 3.43E-21 | 0.81746  | -2.669 | 3.29E-07 | 0.9  |
| SIM1     | 6492   | -2.322 | 1.57E-16 | 0.830601 | -2.473  | 3.10E-25 | 0.82183  | -2.586 | 4.34E-23 | 0.849206 | NA     | NA       | NA   |
| RFX6     | 222546 | -2.292 | 6.27E-16 | 0.830601 | -2.6342 | 5.14E-32 | 0.858748 | -2.189 | 1.64E-14 | 0.81746  | -2.359 | 0.000131 | 0.8  |
| MAB21L1  | 4081   | -3.204 | 3.02E-63 | 0.825137 | -3.4732 | 3.78E-83 | 0.860353 | -2.979 | 4.31E-51 | 0.753968 | -3     | 2.50E-25 | 0.85 |
| GIPC2    | 54810  | -3.054 | 2.47E-62 | 0.825137 | -3.4372 | 1.64E-90 | 0.829856 | -3.209 | 3.37E-68 | 0.813492 | -3.551 | 6.41E-36 | 0.9  |
| SSTR1    | 6751   | -3.107 | 6.50E-56 | 0.825137 | -3.4571 | 6.35E-74 | 0.823435 | -3.095 | 3.04E-50 | 0.777778 | -2.969 | 3.38E-15 | 0.8  |
| F10      | 2159   | -2.888 | 1.78E-52 | 0.825137 | -3.1631 | 4.45E-80 | 0.866774 | -2.765 | 7.82E-49 | 0.781746 | -2.845 | 1.79E-16 | 0.75 |
| FHL5     | 9457   | -2.775 | 8.80E-50 | 0.825137 | -3.0898 | 1.52E-68 | 0.857143 | -2.6   | 9.40E-44 | 0.77381  | -3.242 | 3.42E-20 | 0.9  |
| RGS6     | 9628   | -3.291 | 1.96E-49 | 0.825137 | -3.6055 | 1.14E-63 | 0.808989 | -3.589 | 1.87E-51 | 0.813492 | -3.471 | 2.15E-28 | 0.75 |
| SCN2B    | 6327   | -3.547 | 1.79E-46 | 0.825137 | -4.1734 | 2.48E-73 | 0.863563 | -3.715 | 2.84E-52 | 0.837302 | -4.12  | 1.36E-22 | 0.8  |
| DNASE1L3 | 1776   | -3.38  | 5.43E-45 | 0.825137 | -3.938  | 1.08E-65 | 0.841091 | -3.724 | 1.62E-51 | 0.821429 | -3.984 | 4.09E-24 | 0.85 |
| BMP2     | 650    | -2.558 | 2.80E-42 | 0.825137 | -2.682  | 1.16E-58 | 0.810594 | -2.768 | 5.73E-52 | 0.853175 | -2.834 | 3.47E-14 | 0.8  |
| PLP1     | 5354   | -3.433 | 9.55E-42 | 0.825137 | -3.8633 | 7.58E-50 | 0.820225 | -3.497 | 1.05E-38 | 0.785714 | -4.195 | 3.43E-23 | 0.75 |
| LOXL4    | 84171  | -2.785 | 4.30E-40 | 0.825137 | -2.8426 | 9.66E-52 | 0.778491 | -2.954 | 1.03E-62 | 0.829365 | -3.325 | 8.68E-28 | 0.85 |
| AOC2     | 314    | -2.249 | 4.96E-40 | 0.825137 | -2.2835 | 3.67E-58 | 0.81862  | -2.422 | 1.93E-48 | 0.845238 | -2.741 | 6.80E-14 | 0.9  |
| PTPRZ1   | 5803   | -4.099 | 3.24E-31 | 0.825137 | -4.2034 | 1.85E-38 | 0.82183  | -4.299 | 1.21E-32 | 0.813492 | -5.658 | 1.27E-17 | 0.95 |
| CSRNP3   | 80034  | -2.578 | 6.70E-31 | 0.825137 | -2.775  | 1.26E-49 | 0.839486 | -2.734 | 2.06E-39 | 0.861111 | -3.082 | 1.84E-10 | 0.85 |
| PTGS2    | 5743   | -2.712 | 1.65E-27 | 0.825137 | -3.0865 | 8.82E-41 | 0.82504  | -3.365 | 7.79E-46 | 0.880952 | -4.528 | 4.41E-21 | 0.95 |
| SOX10    | 6663   | -4.041 | 4.49E-22 | 0.825137 | -4.5303 | 4.98E-28 | 0.784912 | -4.588 | 9.38E-28 | 0.821429 | -5.791 | 3.19E-12 | 0.75 |
| MARCO    | 8685   | -3.15  | 3.07E-21 | 0.825137 | -2.7378 | 2.68E-19 | 0.75923  | -3.095 | 3.12E-23 | 0.801587 | -2.615 | 2.10E-06 | 0.8  |
| ROPN1    | 54763  | -3.489 | 7.17E-21 | 0.825137 | -3.4246 | 2.23E-23 | 0.778491 | -3.996 | 2.48E-32 | 0.865079 | -4.379 | 1.39E-09 | 0.8  |
| OCA2     | 4948   | -2.37  | 8.76E-19 | 0.825137 | -2.2491 | 3.83E-19 | 0.760835 | -2.78  | 1.18E-35 | 0.849206 | -2.266 | 1.88E-06 | 0.75 |
| SYCE1    | 93426  | -2.581 | 1.08E-18 | 0.825137 | -2.9057 | 3.28E-34 | 0.861958 | -2.724 | 4.21E-24 | 0.849206 | -2.684 | 4.50E-06 | 0.8  |
| CDH19    | 28513  | -2.603 | 1.53E-18 | 0.825137 | -2.5492 | 4.09E-19 | 0.792937 | -3.2   | 2.07E-40 | 0.857143 | -2.609 | 2.54E-08 | 0.8  |
| KLK7     | 5650   | -3.364 | 4.16E-18 | 0.825137 | -3.4312 | 5.04E-21 | 0.776886 | -3.609 | 1.06E-20 | 0.81746  | -5.209 | 3.52E-10 | 0.85 |
| C4orf49  | 84709  | -2.523 | 3.55E-53 | 0.819672 | -2.634  | 2.22E-79 | 0.81862  | -2.472 | 1.23E-52 | 0.769841 | -2.404 | 1.02E-13 | 0.7  |
| LPHN3    | 23284  | -3.237 | 1.41E-47 | 0.819672 | -3.451  | 5.83E-61 | 0.844302 | -3.218 | 1.46E-47 | 0.829365 | -3.426 | 8.39E-21 | 0.9  |
| JPH2     | 57158  | -2.901 | 1.65E-46 | 0.819672 | -2.9283 | 3.31E-55 | 0.812199 | -2.941 | 2.74E-47 | 0.845238 | -2.606 | 5.48E-14 | 0.85 |
| MYOCD    | 93649  | -2.762 | 1.11E-43 | 0.819672 | -3.0911 | 1.42E-60 | 0.857143 | -2.719 | 5.24E-43 | 0.801587 | -3.702 | 9.08E-22 | 0.9  |

|            |        |        |          |          |         |           |          |        |          |          |        |          |      |
|------------|--------|--------|----------|----------|---------|-----------|----------|--------|----------|----------|--------|----------|------|
| SCN9A      | 6335   | -2.593 | 1.48E-42 | 0.819672 | -2.6204 | 5.50E-68  | 0.841091 | -2.417 | 2.78E-47 | 0.805556 | -2.869 | 3.72E-16 | 0.85 |
| LOC201651  | 201651 | -2.082 | 1.72E-42 | 0.819672 | -2.265  | 2.50E-73  | 0.844302 | -2.168 | 4.78E-48 | 0.81746  | -2.396 | 8.74E-15 | 0.9  |
| LOC339524  | 339524 | -2.52  | 2.74E-41 | 0.819672 | -2.8218 | 3.04E-68  | 0.842697 | -2.62  | 1.63E-49 | 0.805556 | -3.083 | 3.36E-16 | 0.9  |
| KCTD4      | 386618 | -2.178 | 1.09E-40 | 0.819672 | -2.3017 | 5.70E-78  | 0.906902 | -2.262 | 2.12E-47 | 0.880952 | -2.418 | 8.38E-12 | 0.9  |
| GABRE      | 2564   | -3.597 | 1.39E-40 | 0.819672 | -3.553  | 4.57E-52  | 0.831461 | -3.722 | 2.98E-47 | 0.861111 | -3.521 | 8.40E-15 | 0.8  |
| PHKG1      | 5260   | -2.431 | 2.95E-39 | 0.819672 | -2.5898 | 6.00E-50  | 0.842697 | -2.586 | 2.12E-40 | 0.829365 | -2.481 | 6.94E-12 | 0.8  |
| PTCHD1     | 139411 | -3.655 | 8.70E-33 | 0.819672 | -3.6349 | 1.61E-37  | 0.778491 | -4.017 | 5.11E-43 | 0.857143 | -3.418 | 1.15E-09 | 0.75 |
| FLJ35024   | 401491 | -2.424 | 2.51E-32 | 0.819672 | -2.1156 | 5.20E-35  | 0.744783 | -2.473 | 1.93E-40 | 0.809524 | NA     | NA       | NA   |
| EFCAB1     | 79645  | -3.066 | 3.96E-31 | 0.819672 | -3.4059 | 9.66E-54  | 0.831461 | -3.227 | 1.58E-36 | 0.829365 | -2.755 | 1.62E-07 | 0.75 |
| IL17B      | 27190  | -2.978 | 3.46E-27 | 0.819672 | -3.5183 | 1.64E-54  | 0.874799 | -3.191 | 4.70E-34 | 0.861111 | -3.607 | 1.12E-10 | 0.85 |
| SLC29A4    | 222962 | -2.281 | 2.46E-26 | 0.819672 | -2.0928 | 1.87E-34  | 0.778491 | -2.084 | 8.05E-26 | 0.789683 | NA     | NA       | NA   |
| ADRB1      | 153    | -2.592 | 1.21E-25 | 0.819672 | -2.7862 | 1.81E-31  | 0.810594 | -2.831 | 1.62E-30 | 0.813492 | -2.619 | 6.19E-09 | 0.8  |
| SOSTDC1    | 25928  | -3.426 | 5.48E-24 | 0.819672 | -3.5752 | 7.36E-29  | 0.776886 | -4.05  | 2.60E-34 | 0.873016 | -4.341 | 6.62E-10 | 0.8  |
| EDAR       | 10913  | -2.523 | 1.54E-21 | 0.819672 | -2.7103 | 1.00E-36  | 0.823435 | -2.82  | 2.97E-30 | 0.84127  | -3.192 | 2.79E-08 | 0.8  |
| STAC2      | 342667 | -3.861 | 5.89E-19 | 0.819672 | -4.3613 | 8.13E-29  | 0.808989 | -4.395 | 2.87E-22 | 0.829365 | -5.453 | 1.25E-08 | 0.75 |
| KRT5       | 3852   | -3.263 | 9.80E-17 | 0.819672 | -3.8548 | 4.57E-22  | 0.767255 | -3.959 | 4.00E-20 | 0.821429 | -4.948 | 2.84E-08 | 0.8  |
| KRT14      | 3861   | -3.341 | 7.42E-16 | 0.819672 | -4.2104 | 3.63E-25  | 0.849117 | -4.141 | 6.81E-20 | 0.833333 | -5.293 | 1.99E-08 | 0.9  |
| C2orf82    | 389084 | -2.351 | 2.63E-11 | 0.819672 | -2.6903 | 2.10E-21  | 0.837881 | -2.686 | 1.02E-18 | 0.84127  | -2.84  | 4.73E-05 | 0.8  |
| GSN        | 2934   | -2.269 | 2.34E-64 | 0.814208 | -2.4202 | 3.19E-115 | 0.82825  | -2.331 | 4.32E-67 | 0.753968 | -2.381 | 8.64E-19 | 0.9  |
| ADRB2      | 154    | -2.829 | 3.18E-61 | 0.814208 | -3.2967 | 1.04E-90  | 0.857143 | -3.03  | 1.79E-68 | 0.853175 | -3.506 | 1.31E-27 | 0.9  |
| HOXA6      | 3203   | -3.04  | 1.13E-51 | 0.814208 | -3.1828 | 3.06E-68  | 0.791332 | -2.924 | 1.70E-54 | 0.805556 | -2.712 | 2.20E-19 | 0.8  |
| GPC3       | 2719   | -3.449 | 1.07E-46 | 0.814208 | -3.8842 | 1.48E-66  | 0.871589 | -3.631 | 2.86E-57 | 0.869048 | -3.855 | 2.01E-25 | 0.8  |
| AKAP12     | 9590   | -2.587 | 1.40E-42 | 0.814208 | -2.8708 | 1.21E-76  | 0.836276 | -2.584 | 1.86E-52 | 0.821429 | -2.962 | 1.22E-16 | 0.85 |
| RGS7BP     | 401190 | -2.807 | 3.82E-42 | 0.814208 | -2.8246 | 7.10E-48  | 0.778491 | -2.659 | 2.57E-38 | 0.742063 | -3.209 | 4.02E-15 | 0.75 |
| AOX1       | 316    | -2.933 | 6.94E-41 | 0.814208 | -3.1799 | 3.15E-56  | 0.833066 | -2.908 | 7.17E-42 | 0.809524 | -3.764 | 4.66E-19 | 0.85 |
| FAM89A     | 375061 | -2.326 | 1.61E-38 | 0.814208 | -2.4504 | 1.96E-63  | 0.836276 | -2.393 | 4.39E-44 | 0.821429 | -2.53  | 4.66E-11 | 0.8  |
| NCRNA00092 | 1E+08  | -2.947 | 2.60E-35 | 0.814208 | -2.8729 | 1.20E-39  | 0.810594 | -3.199 | 5.43E-51 | 0.849206 | -3.302 | 3.16E-17 | 0.85 |
| UNC13C     | 440279 | -2.002 | 1.52E-31 | 0.814208 | -2.1285 | 3.80E-45  | 0.823435 | -2.043 | 2.70E-34 | 0.769841 | NA     | NA       | NA   |
| NAT8L      | 339983 | -2.757 | 6.83E-30 | 0.814208 | -2.9348 | 1.07E-45  | 0.839486 | -2.733 | 1.91E-34 | 0.821429 | -2.735 | 6.34E-09 | 0.85 |
| BCHE       | 590    | -2.537 | 6.17E-28 | 0.814208 | -2.7456 | 1.12E-40  | 0.815409 | -2.607 | 3.03E-30 | 0.821429 | NA     | NA       | NA   |
| EMILIN3    | 90187  | -2.93  | 1.93E-26 | 0.814208 | -2.9175 | 1.65E-35  | 0.807384 | -2.945 | 1.40E-31 | 0.821429 | -3.034 | 1.26E-10 | 0.85 |
| MPZ        | 4359   | -2.02  | 3.04E-24 | 0.814208 | NA      | NA        | NA       | -2.158 | 1.91E-34 | 0.837302 | -2.13  | 8.12E-09 | 0.75 |
| IL22RA2    | 116379 | -2.32  | 2.88E-14 | 0.814208 | -2.1174 | 1.92E-17  | 0.733547 | -2.559 | 1.85E-22 | 0.833333 | -2.086 | 0.00092  | 0.75 |
| TAT        | 6898   | -3.987 | 7.41E-14 | 0.814208 | -4.7331 | 3.69E-29  | 0.869984 | -4.317 | 4.59E-19 | 0.857143 | -6.48  | 4.00E-09 | 0.9  |

|           |        |        |          |          |         |           |          |        |          |          |        |          |      |
|-----------|--------|--------|----------|----------|---------|-----------|----------|--------|----------|----------|--------|----------|------|
| KLHL29    | 114818 | -2.936 | 1.56E-68 | 0.808743 | -3.1928 | 2.04E-101 | 0.841091 | -3.165 | 4.54E-76 | 0.845238 | -3.569 | 3.98E-36 | 0.85 |
| LOC286367 | 286367 | -2.475 | 3.24E-63 | 0.808743 | -2.7398 | 6.50E-106 | 0.831461 | -2.8   | 4.67E-70 | 0.81746  | -2.72  | 8.94E-25 | 0.8  |
| DENND2A   | 27147  | -2.542 | 1.12E-60 | 0.808743 | -2.5047 | 1.03E-81  | 0.760835 | -2.439 | 3.07E-68 | 0.769841 | -2.221 | 1.11E-17 | 0.7  |
| MATN2     | 4147   | -3.214 | 1.92E-57 | 0.808743 | -3.5789 | 4.33E-82  | 0.81862  | -3.252 | 7.71E-64 | 0.777778 | -3.743 | 1.50E-34 | 0.85 |
| SYNPO2    | 171024 | -2.755 | 5.45E-56 | 0.808743 | -3.0177 | 8.90E-70  | 0.813804 | -2.657 | 4.15E-55 | 0.781746 | -3.246 | 8.17E-29 | 0.85 |
| ADAM33    | 80332  | -3.347 | 3.40E-50 | 0.808743 | -3.9042 | 4.17E-78  | 0.850722 | -3.327 | 2.36E-47 | 0.761905 | -4.022 | 4.25E-28 | 0.9  |
| GPR17     | 2840   | -2.609 | 3.07E-42 | 0.808743 | -2.9676 | 6.14E-71  | 0.836276 | -2.705 | 1.93E-44 | 0.793651 | -2.883 | 3.71E-18 | 0.85 |
| BMPER     | 168667 | -3.019 | 3.34E-38 | 0.808743 | -3.5034 | 3.90E-65  | 0.855538 | -3.276 | 3.21E-51 | 0.821429 | -3.373 | 1.03E-15 | 0.85 |
| SNTG2     | 54221  | -2.755 | 7.24E-36 | 0.808743 | -3.042  | 9.98E-58  | 0.850722 | -2.986 | 1.85E-43 | 0.825397 | -3.35  | 3.64E-16 | 0.9  |
| GPR12     | 2835   | -3.39  | 4.96E-30 | 0.808743 | -3.4346 | 3.81E-35  | 0.778491 | -3.714 | 2.83E-45 | 0.833333 | -3.673 | 2.21E-16 | 0.75 |
| ACE2      | 59272  | -2.549 | 1.81E-22 | 0.808743 | -2.1798 | 5.00E-16  | 0.70305  | -2.613 | 7.37E-28 | 0.75     | -2.521 | 1.48E-12 | 0.65 |
| TSPAN8    | 7103   | -3.134 | 2.05E-22 | 0.808743 | -3.1251 | 3.51E-22  | 0.739968 | -3.064 | 1.16E-21 | 0.694444 | -3.516 | 6.82E-11 | 0.75 |
| KLK8      | 11202  | -3.199 | 9.22E-20 | 0.808743 | -2.9563 | 3.28E-19  | 0.749599 | -3.173 | 1.11E-19 | 0.781746 | -4.45  | 3.23E-10 | 0.85 |
| CLDN8     | 9073   | -2.286 | 9.21E-12 | 0.808743 | -2.787  | 1.65E-23  | 0.81862  | -2.713 | 7.94E-17 | 0.805556 | -2.875 | 0.000892 | 0.8  |
| HSPB2     | 3316   | -2.789 | 3.39E-63 | 0.803279 | -2.9041 | 1.18E-83  | 0.829856 | -2.67  | 1.98E-62 | 0.781746 | -2.609 | 6.18E-24 | 0.85 |
| C1QTNF9B  | 387911 | -2.536 | 1.78E-50 | 0.803279 | -2.7387 | 1.14E-74  | 0.81862  | -2.618 | 4.54E-53 | 0.813492 | -2.35  | 9.54E-16 | 0.65 |
| TPO       | 7173   | -3.049 | 4.16E-49 | 0.803279 | -3.5648 | 8.09E-79  | 0.876404 | -3.088 | 1.24E-54 | 0.809524 | -3.611 | 8.19E-24 | 0.85 |
| ALDH1A1   | 216    | -2.832 | 2.55E-48 | 0.803279 | -2.9683 | 3.66E-75  | 0.812199 | -2.655 | 1.47E-60 | 0.753968 | -3.258 | 5.49E-24 | 0.9  |
| CLDN5     | 7122   | -2.719 | 4.00E-48 | 0.803279 | -3.088  | 1.34E-76  | 0.829856 | -2.601 | 7.13E-40 | 0.730159 | -2.557 | 2.24E-17 | 0.7  |
| TCF21     | 6943   | -2.149 | 1.32E-42 | 0.803279 | -2.2149 | 1.08E-67  | 0.820225 | -2.033 | 9.42E-42 | 0.797619 | NA     | NA       | NA   |
| HOXA9     | 3205   | -2.614 | 2.29E-42 | 0.803279 | -2.7524 | 7.56E-54  | 0.807384 | -2.58  | 4.16E-48 | 0.805556 | -2.812 | 1.05E-25 | 0.85 |
| KCNMB1    | 3779   | -2.598 | 4.85E-38 | 0.803279 | -2.8122 | 1.40E-65  | 0.82504  | -2.749 | 5.11E-46 | 0.833333 | -2.768 | 5.59E-11 | 0.8  |
| LOC158376 | 158376 | -2.246 | 1.64E-37 | 0.803279 | -2.4003 | 9.49E-59  | 0.802568 | -2.439 | 6.33E-54 | 0.793651 | -2.622 | 4.64E-19 | 0.85 |
| GLDN      | 342035 | -2.575 | 9.55E-36 | 0.803279 | -2.7719 | 7.11E-48  | 0.81862  | -2.344 | 1.11E-33 | 0.765873 | -2.894 | 3.81E-13 | 0.85 |
| ASTN1     | 460    | -2.889 | 3.37E-35 | 0.803279 | -3.1604 | 8.65E-46  | 0.807384 | -2.98  | 1.11E-31 | 0.785714 | -3.606 | 8.74E-14 | 0.8  |
| DDR2      | 4921   | -2.587 | 1.95E-33 | 0.803279 | -2.6354 | 2.35E-50  | 0.815409 | -2.593 | 2.07E-39 | 0.837302 | -2.802 | 1.46E-11 | 0.9  |
| PSD2      | 84249  | -2.397 | 4.14E-33 | 0.803279 | -2.408  | 9.53E-45  | 0.786517 | -2.273 | 2.25E-31 | 0.777778 | -2.364 | 1.49E-07 | 0.75 |
| C1QTNF7   | 114905 | -2.614 | 4.24E-31 | 0.803279 | -3.0386 | 1.13E-45  | 0.817014 | -2.543 | 2.25E-35 | 0.809524 | -3.179 | 9.40E-13 | 0.9  |
| CCL28     | 56477  | -2.967 | 7.22E-26 | 0.803279 | -3.2819 | 1.13E-39  | 0.82504  | -3.213 | 3.63E-35 | 0.849206 | -4.081 | 2.02E-12 | 0.95 |
| TP53AIP1  | 63970  | -2.368 | 1.48E-21 | 0.803279 | -2.6162 | 2.45E-40  | 0.817014 | -2.54  | 4.62E-26 | 0.84127  | -2.571 | 1.99E-05 | 0.75 |
| PI15      | 51050  | -2.781 | 1.13E-15 | 0.803279 | -3.3593 | 9.69E-32  | 0.853933 | -3.284 | 4.69E-24 | 0.861111 | -3.571 | 1.27E-06 | 0.8  |
| FAM13A    | 10144  | -2.499 | 2.72E-69 | 0.797814 | -2.5634 | 4.59E-119 | 0.841091 | -2.639 | 1.13E-84 | 0.849206 | -2.771 | 2.05E-25 | 0.85 |
| GNAI1     | 2770   | -2.487 | 7.58E-57 | 0.797814 | -2.5368 | 2.66E-81  | 0.776886 | -2.503 | 1.06E-59 | 0.789683 | -2.632 | 7.52E-18 | 0.8  |
| PID1      | 55022  | -2.732 | 5.81E-54 | 0.797814 | -2.8095 | 2.93E-71  | 0.788122 | -2.714 | 2.63E-56 | 0.777778 | -2.868 | 1.14E-17 | 0.75 |

|           |        |        |          |          |         |          |          |        |          |          |        |          |      |
|-----------|--------|--------|----------|----------|---------|----------|----------|--------|----------|----------|--------|----------|------|
| INMT      | 11185  | -2.937 | 1.27E-51 | 0.797814 | -3.2408 | 4.65E-71 | 0.799358 | -2.621 | 5.91E-47 | 0.714286 | -3.11  | 2.16E-22 | 0.75 |
| IQSEC3    | 440073 | -2.586 | 8.61E-42 | 0.797814 | -2.7404 | 2.71E-59 | 0.789727 | -2.641 | 1.19E-45 | 0.797619 | -3.19  | 8.27E-20 | 0.95 |
| AKAP6     | 9472   | -2.218 | 2.02E-41 | 0.797814 | -2.2955 | 7.96E-66 | 0.773676 | -2.227 | 4.41E-52 | 0.813492 | -2.627 | 6.14E-18 | 0.9  |
| EGR1      | 1958   | -2.72  | 6.21E-41 | 0.797814 | -3.1661 | 7.58E-73 | 0.831461 | -3.075 | 2.91E-48 | 0.801587 | -3.98  | 5.76E-24 | 0.9  |
| C11orf92  | 399948 | -2.849 | 5.11E-37 | 0.797814 | -2.7632 | 1.07E-35 | 0.760835 | -2.55  | 3.45E-29 | 0.72619  | -3.137 | 2.43E-13 | 0.8  |
| NCAM1     | 4684   | -2.666 | 5.14E-34 | 0.797814 | -2.7915 | 1.08E-47 | 0.776886 | -2.937 | 1.64E-52 | 0.797619 | -3.095 | 9.76E-24 | 0.8  |
| PIWIL2    | 55124  | -2.223 | 2.74E-27 | 0.797814 | -2.44   | 9.80E-39 | 0.805778 | -2.503 | 5.58E-37 | 0.821429 | -2.721 | 2.30E-11 | 0.85 |
| HSD11B1   | 3290   | -2.338 | 1.17E-23 | 0.797814 | -2.5272 | 1.38E-40 | 0.841091 | -2.447 | 5.81E-31 | 0.833333 | -3     | 1.37E-09 | 0.9  |
| FAM166B   | 730112 | -2.09  | 2.71E-22 | 0.797814 | -2.3349 | 2.09E-39 | 0.849117 | -2.193 | 1.07E-27 | 0.81746  | NA     | NA       | NA   |
| C1QL2     | 165257 | -2.391 | 1.72E-19 | 0.797814 | -2.1775 | 9.79E-18 | 0.743178 | -2.548 | 4.29E-24 | 0.805556 | -2.833 | 4.11E-07 | 0.8  |
| LOC121838 | 121838 | -2.371 | 1.97E-19 | 0.797814 | -2.4963 | 3.59E-28 | 0.780096 | -2.517 | 1.27E-26 | 0.801587 | -2.242 | 4.17E-06 | 0.7  |
| DCX       | 1641   | -2.612 | 5.60E-17 | 0.797814 | -2.5841 | 3.42E-17 | 0.752809 | -2.998 | 2.30E-22 | 0.845238 | -3.404 | 7.22E-09 | 0.75 |
| GABRP     | 2568   | -3.249 | 8.12E-14 | 0.797814 | -3.4951 | 2.76E-18 | 0.760835 | -3.962 | 1.76E-21 | 0.857143 | -5.207 | 1.87E-08 | 0.75 |
| HOXA7     | 3204   | -2.752 | 1.78E-52 | 0.79235  | -2.937  | 2.90E-65 | 0.752809 | -2.709 | 4.74E-57 | 0.746032 | -2.68  | 6.98E-35 | 0.8  |
| PHYHIP    | 9796   | -2.753 | 6.03E-51 | 0.79235  | -2.9994 | 1.38E-74 | 0.802568 | -2.636 | 7.17E-53 | 0.714286 | -3.031 | 1.05E-24 | 0.75 |
| CNTNAP3   | 79937  | -3.37  | 1.83E-50 | 0.79235  | -3.8546 | 2.18E-61 | 0.799358 | -3.866 | 6.37E-59 | 0.837302 | -4.76  | 6.10E-34 | 0.85 |
| ABCA6     | 23460  | -3.148 | 5.10E-48 | 0.79235  | -3.5169 | 1.39E-73 | 0.855538 | -3.039 | 7.87E-53 | 0.805556 | -3.777 | 2.81E-24 | 0.95 |
| IL33      | 90865  | -3.378 | 9.96E-47 | 0.79235  | -4.1278 | 7.67E-68 | 0.839486 | -3.714 | 2.94E-47 | 0.789683 | -4.771 | 1.23E-36 | 0.9  |
| TACR1     | 6869   | -3.276 | 4.65E-46 | 0.79235  | -3.9085 | 1.72E-64 | 0.82825  | -3.822 | 3.49E-54 | 0.801587 | -4.103 | 2.39E-25 | 0.8  |
| AKR1C3    | 8644   | -2.548 | 2.38E-41 | 0.79235  | -2.7788 | 1.23E-59 | 0.788122 | -2.572 | 9.10E-48 | 0.821429 | -2.816 | 2.18E-15 | 0.8  |
| CXCL3     | 2921   | -2.872 | 1.07E-38 | 0.79235  | -2.8589 | 6.66E-50 | 0.76886  | -3.141 | 5.75E-50 | 0.813492 | -3.413 | 4.49E-21 | 0.9  |
| FLJ37543  | 285668 | -2.039 | 7.06E-32 | 0.79235  | -2.1117 | 1.39E-46 | 0.805778 | -2.143 | 2.51E-38 | 0.809524 | -2.674 | 1.18E-13 | 0.9  |
| LMO3      | 55885  | -2.638 | 7.47E-27 | 0.79235  | -2.4755 | 1.48E-24 | 0.741573 | -2.415 | 3.65E-25 | 0.777778 | -2.095 | 6.73E-06 | 0.6  |
| CXCL5     | 6374   | -2.467 | 3.54E-18 | 0.79235  | -2.1464 | 2.11E-15 | 0.772071 | -2.864 | 1.32E-27 | 0.892857 | -2.821 | 3.87E-07 | 0.95 |
| SCGB3A1   | 92304  | -2.494 | 1.04E-10 | 0.79235  | -3.4644 | 1.79E-24 | 0.831461 | -3.409 | 1.52E-19 | 0.861111 | -3.244 | 3.37E-05 | 0.8  |
| UGT2B11   | 10720  | -2.276 | 3.19E-05 | 0.79235  | -3.2451 | 2.10E-14 | 0.873194 | -2.844 | 3.03E-09 | 0.845238 | NA     | NA       | NA   |
| NRN1      | 51299  | -2.514 | 9.27E-57 | 0.786885 | -2.5092 | 3.30E-71 | 0.757624 | -2.401 | 1.40E-58 | 0.746032 | -2.495 | 2.28E-19 | 0.8  |
| LOC145820 | 145820 | -2.542 | 7.24E-50 | 0.786885 | -2.8486 | 6.69E-72 | 0.820225 | -2.501 | 2.97E-48 | 0.742063 | -2.992 | 4.77E-21 | 0.85 |
| KLF4      | 9314   | -2.388 | 7.29E-47 | 0.786885 | -2.6472 | 5.85E-76 | 0.820225 | -2.556 | 1.17E-52 | 0.785714 | -3.041 | 6.00E-18 | 0.9  |
| MEOX1     | 4222   | -3.06  | 2.25E-41 | 0.786885 | -3.786  | 1.02E-60 | 0.812199 | -3.355 | 7.91E-43 | 0.761905 | -3.966 | 5.17E-26 | 0.85 |
| OSR1      | 130497 | -3.129 | 1.01E-37 | 0.786885 | -3.6254 | 9.75E-47 | 0.754414 | -3.532 | 3.03E-40 | 0.753968 | -4.244 | 4.90E-24 | 0.8  |
| WSCD2     | 9671   | -2.864 | 9.98E-37 | 0.786885 | -3.2716 | 1.91E-58 | 0.82825  | -3.043 | 2.00E-52 | 0.825397 | -3.302 | 1.39E-24 | 0.85 |
| C14orf49  | 161176 | -2.385 | 1.27E-36 | 0.786885 | -2.6699 | 1.87E-68 | 0.857143 | -2.536 | 9.30E-47 | 0.825397 | -2.685 | 5.15E-12 | 0.85 |
| PTGFR     | 5737   | -2.962 | 2.35E-36 | 0.786885 | -3.1083 | 6.01E-48 | 0.799358 | -3.204 | 1.89E-49 | 0.84127  | -3.893 | 2.46E-21 | 0.9  |

|           |        |        |          |          |         |          |          |        |          |          |        |          |      |
|-----------|--------|--------|----------|----------|---------|----------|----------|--------|----------|----------|--------|----------|------|
| LOC440173 | 440173 | -2.233 | 3.16E-34 | 0.786885 | -2.214  | 6.42E-35 | 0.76244  | -2.124 | 6.99E-27 | 0.761905 | -2.003 | 1.70E-08 | 0.8  |
| MYO1H     | 283446 | -2.339 | 3.50E-34 | 0.786885 | -2.2593 | 3.08E-40 | 0.756019 | -2.236 | 5.09E-31 | 0.738095 | NA     | NA       | NA   |
| PROX1     | 5629   | -2.835 | 5.72E-33 | 0.786885 | -3.1218 | 1.95E-51 | 0.820225 | -3.163 | 3.79E-46 | 0.84127  | -3.536 | 3.62E-16 | 0.9  |
| OGN       | 4969   | -3.351 | 1.03E-32 | 0.786885 | -4.1261 | 8.99E-51 | 0.820225 | -3.568 | 2.48E-41 | 0.813492 | -4.58  | 1.52E-24 | 0.9  |
| PCDH11X   | 27328  | -2.619 | 1.08E-22 | 0.786885 | -2.8165 | 1.06E-35 | 0.796148 | -3.111 | 1.36E-41 | 0.853175 | -3.604 | 3.86E-19 | 0.85 |
| KCNS1     | 3787   | -2.362 | 8.95E-18 | 0.786885 | -2.4987 | 2.21E-25 | 0.775281 | -2.857 | 2.92E-29 | 0.861111 | -2.524 | 1.39E-05 | 0.75 |
| SLC6A14   | 11254  | -3.237 | 4.26E-16 | 0.786885 | -3.2871 | 1.11E-19 | 0.76886  | -3.947 | 1.35E-26 | 0.849206 | -4.038 | 3.02E-06 | 0.75 |
| KLK6      | 5653   | -2.742 | 2.70E-13 | 0.786885 | -2.6828 | 3.68E-13 | 0.720706 | -2.912 | 1.47E-14 | 0.761905 | -4.113 | 2.04E-07 | 0.85 |
| USP44     | 84101  | -2.842 | 7.80E-54 | 0.781421 | -3.1636 | 7.61E-79 | 0.820225 | -3.081 | 2.26E-61 | 0.84127  | -3.524 | 2.50E-29 | 0.9  |
| TSHZ2     | 128553 | -3.084 | 8.28E-52 | 0.781421 | -3.316  | 5.60E-76 | 0.826645 | -2.955 | 8.01E-57 | 0.793651 | -3.774 | 5.40E-29 | 0.9  |
| CCL16     | 6360   | -2.305 | 3.31E-46 | 0.781421 | -2.584  | 6.35E-84 | 0.815409 | -2.186 | 6.77E-42 | 0.714286 | -2.573 | 2.83E-18 | 0.8  |
| C10orf108 | 414235 | -2.44  | 2.20E-44 | 0.781421 | -2.6364 | 2.56E-61 | 0.81862  | -2.6   | 2.47E-58 | 0.813492 | -2.568 | 5.34E-17 | 0.75 |
| TMEM178   | 130733 | -2.331 | 3.68E-39 | 0.781421 | -2.648  | 5.64E-61 | 0.810594 | -2.432 | 1.89E-40 | 0.757937 | -2.599 | 7.83E-13 | 0.85 |
| SOD3      | 6649   | -2.578 | 6.59E-39 | 0.781421 | -2.9242 | 4.11E-63 | 0.796148 | -2.748 | 4.71E-43 | 0.753968 | -3.026 | 6.27E-19 | 0.85 |
| ECM2      | 1842   | -2.372 | 1.09E-38 | 0.781421 | -2.6105 | 1.34E-63 | 0.807384 | -2.36  | 3.96E-43 | 0.781746 | -2.714 | 1.31E-12 | 0.9  |
| STK32A    | 202374 | -2.496 | 3.46E-36 | 0.781421 | -2.6999 | 2.55E-61 | 0.831461 | -2.733 | 1.89E-55 | 0.869048 | -3.082 | 3.48E-18 | 1    |
| CRTAC1    | 55118  | -2.818 | 4.02E-30 | 0.781421 | -3.1435 | 1.08E-36 | 0.749599 | -3.267 | 1.61E-39 | 0.777778 | -2.627 | 1.35E-11 | 0.75 |
| TP63      | 8626   | -3.114 | 4.24E-25 | 0.781421 | -3.539  | 4.42E-41 | 0.810594 | -3.207 | 1.48E-26 | 0.777778 | -4.578 | 1.16E-11 | 0.85 |
| MUC15     | 143662 | -3.339 | 2.19E-16 | 0.781421 | -3.0981 | 5.13E-19 | 0.717496 | -3.149 | 1.79E-16 | 0.753968 | -2.636 | 0.0025   | 0.55 |
| FOLR1     | 2348   | -2.933 | 2.80E-15 | 0.781421 | -3.045  | 5.73E-19 | 0.727127 | -2.832 | 2.04E-14 | 0.718254 | -3.098 | 6.17E-05 | 0.6  |
| LY6D      | 8581   | -2.611 | 4.11E-15 | 0.781421 | -2.1106 | 1.31E-09 | 0.741573 | -2.47  | 4.98E-15 | 0.785714 | -2.934 | 3.13E-06 | 0.8  |
| TAC1      | 6863   | -2.18  | 4.70E-15 | 0.781421 | -2.6808 | 1.10E-30 | 0.789727 | -2.101 | 1.24E-15 | 0.714286 | -3.089 | 6.65E-08 | 0.85 |
| C7orf41   | 222166 | -2.262 | 1.03E-54 | 0.775956 | -2.473  | 2.18E-93 | 0.823435 | -2.506 | 2.36E-67 | 0.829365 | -2.695 | 1.69E-19 | 0.9  |
| MRAS      | 22808  | -2.392 | 1.12E-53 | 0.775956 | -2.3237 | 1.49E-76 | 0.756019 | -2.485 | 9.12E-80 | 0.825397 | -2.331 | 6.82E-21 | 0.75 |
| NECAB1    | 64168  | -2.68  | 6.39E-50 | 0.775956 | -2.7171 | 1.54E-64 | 0.788122 | -2.566 | 6.03E-51 | 0.730159 | -3.139 | 1.56E-28 | 0.9  |
| EGFR      | 1956   | -3.279 | 1.09E-46 | 0.775956 | -3.2922 | 5.30E-51 | 0.75923  | -3.479 | 2.23E-53 | 0.825397 | -3.986 | 1.39E-28 | 0.85 |
| CX3CL1    | 6376   | -2.806 | 2.92E-44 | 0.775956 | -2.9159 | 3.37E-65 | 0.781701 | -3.009 | 9.39E-53 | 0.805556 | -3.304 | 1.87E-19 | 0.9  |
| PPP1R14A  | 94274  | -2.781 | 3.42E-43 | 0.775956 | -2.8587 | 3.16E-52 | 0.756019 | -2.628 | 3.67E-38 | 0.690476 | -2.383 | 2.83E-17 | 0.75 |
| ODZ1      | 10178  | -2.881 | 1.42E-42 | 0.775956 | -2.9637 | 1.86E-54 | 0.788122 | -2.876 | 3.33E-42 | 0.765873 | -2.968 | 1.62E-17 | 0.75 |
| SCN5A     | 6331   | -2.658 | 4.13E-39 | 0.775956 | -2.8878 | 3.23E-60 | 0.813804 | -2.965 | 8.39E-48 | 0.789683 | -3.271 | 9.10E-17 | 0.8  |
| GFRA2     | 2675   | -2.437 | 1.55E-33 | 0.775956 | -2.8002 | 2.62E-55 | 0.81862  | -2.698 | 1.33E-40 | 0.813492 | -2.806 | 1.31E-12 | 0.9  |
| PPARGC1A  | 10891  | -2.549 | 1.84E-33 | 0.775956 | -2.5503 | 3.40E-34 | 0.731942 | -2.751 | 3.85E-43 | 0.765873 | -2.78  | 8.89E-15 | 0.7  |
| LCN6      | 158062 | -2.194 | 1.02E-29 | 0.775956 | -2.5373 | 3.00E-62 | 0.82825  | -2.266 | 1.85E-31 | 0.753968 | -2.588 | 1.65E-11 | 0.9  |
| CLDN2     | 9075   | -2.217 | 2.48E-26 | 0.775956 | -2.0889 | 5.18E-27 | 0.736758 | -2.225 | 9.70E-26 | 0.757937 | -2.04  | 5.84E-07 | 0.85 |

|           |        |        |          |          |         |          |          |        |          |          |        |          |      |
|-----------|--------|--------|----------|----------|---------|----------|----------|--------|----------|----------|--------|----------|------|
| OR2L13    | 284521 | -2.037 | 3.32E-22 | 0.775956 | -2.3434 | 2.15E-47 | 0.808989 | -2.141 | 6.23E-26 | 0.769841 | -2.509 | 1.14E-07 | 0.85 |
| ELOVL3    | 83401  | -2.047 | 3.27E-21 | 0.775956 | NA      | NA       | NA       | -2.115 | 4.18E-23 | 0.753968 | NA     | NA       | NA   |
| CCDC129   | 223075 | -2.568 | 8.60E-18 | 0.775956 | -2.4062 | 2.29E-20 | 0.752809 | -2.73  | 2.55E-23 | 0.789683 | -2.751 | 3.87E-06 | 0.8  |
| VGLL1     | 51442  | -2.859 | 7.86E-13 | 0.775956 | -2.6402 | 1.89E-12 | 0.715891 | -2.972 | 7.86E-17 | 0.789683 | -3.253 | 1.33E-05 | 0.8  |
| SCGN      | 10590  | -2.134 | 1.88E-11 | 0.775956 | -2.2672 | 1.21E-14 | 0.783307 | -2.344 | 2.44E-15 | 0.781746 | NA     | NA       | NA   |
| LGI4      | 163175 | -2.541 | 5.78E-55 | 0.770492 | -2.678  | 2.48E-82 | 0.789727 | -2.405 | 9.75E-53 | 0.714286 | -2.451 | 2.96E-19 | 0.75 |
| TGFBR3    | 7049   | -2.953 | 6.31E-52 | 0.770492 | -3.4991 | 4.98E-71 | 0.799358 | -3.214 | 1.10E-59 | 0.77381  | -3.602 | 6.08E-31 | 0.8  |
| RGN       | 9104   | -3.124 | 7.90E-46 | 0.770492 | -3.3784 | 2.30E-56 | 0.760835 | -3.49  | 4.17E-56 | 0.801587 | -3.492 | 3.11E-31 | 0.8  |
| COX7A1    | 1346   | -2.288 | 1.21E-40 | 0.770492 | -2.5928 | 2.59E-67 | 0.82504  | -2.277 | 7.72E-43 | 0.761905 | -2.007 | 1.34E-10 | 0.8  |
| ODF3L1    | 161753 | -2.363 | 5.72E-40 | 0.770492 | -2.5166 | 1.71E-62 | 0.791332 | -2.44  | 1.19E-45 | 0.789683 | -3.046 | 6.21E-17 | 0.85 |
| EBF2      | 64641  | -2.563 | 2.31E-35 | 0.770492 | -2.8022 | 1.47E-52 | 0.789727 | -2.541 | 1.77E-36 | 0.765873 | -2.941 | 1.13E-12 | 0.9  |
| ABCC9     | 10060  | -2.166 | 3.15E-35 | 0.770492 | -2.3136 | 1.36E-54 | 0.770465 | NA     | NA       | NA       | -2.215 | 2.08E-09 | 0.9  |
| KCNA1     | 3736   | -2.616 | 1.32E-28 | 0.770492 | -3.0313 | 3.51E-46 | 0.81862  | -2.835 | 4.98E-33 | 0.757937 | -3.962 | 1.41E-16 | 0.9  |
| BNC1      | 646    | -2.602 | 1.44E-27 | 0.770492 | -2.9135 | 1.71E-36 | 0.807384 | -3.007 | 1.06E-33 | 0.853175 | -3.467 | 2.32E-14 | 0.9  |
| SLC27A6   | 28965  | -3.204 | 3.17E-26 | 0.770492 | -3.5615 | 8.64E-39 | 0.786517 | -3.667 | 1.22E-32 | 0.801587 | -3.981 | 2.06E-11 | 0.8  |
| CCL23     | 6368   | -2.038 | 4.54E-25 | 0.770492 | -2.1892 | 1.70E-40 | 0.764045 | NA     | NA       | NA       | -2.459 | 3.24E-09 | 0.8  |
| DEFB1     | 1672   | -2.849 | 1.21E-23 | 0.770492 | -2.8721 | 5.75E-25 | 0.712681 | -2.937 | 1.70E-26 | 0.722222 | -3.405 | 6.21E-11 | 0.75 |
| GPR64     | 10149  | -2.129 | 1.03E-22 | 0.770492 | -2.3066 | 7.23E-33 | 0.783307 | -2.525 | 1.73E-35 | 0.876984 | -2.344 | 5.18E-10 | 0.75 |
| AK5       | 26289  | -2.911 | 8.85E-22 | 0.770492 | -3.4771 | 1.39E-40 | 0.82504  | -3.234 | 8.41E-30 | 0.829365 | -3.093 | 7.54E-07 | 0.8  |
| NRG1      | 3084   | -2.561 | 1.66E-20 | 0.770492 | -2.8473 | 1.72E-33 | 0.804173 | -2.909 | 9.26E-27 | 0.81746  | -3.506 | 7.28E-08 | 0.9  |
| SLC13A2   | 9058   | -2.966 | 6.33E-15 | 0.770492 | -3.35   | 1.81E-25 | 0.820225 | -2.874 | 4.04E-15 | 0.765873 | -3.246 | 6.21E-05 | 0.85 |
| KL        | 9365   | -2.778 | 1.48E-61 | 0.765027 | -3.1778 | 1.24E-87 | 0.836276 | -2.838 | 5.94E-65 | 0.801587 | -3.454 | 1.52E-34 | 0.95 |
| NDRG2     | 57447  | -2.511 | 2.85E-60 | 0.765027 | -2.6649 | 3.30E-77 | 0.76565  | -2.744 | 2.60E-68 | 0.781746 | -3.011 | 1.60E-27 | 0.75 |
| GNAL      | 2774   | -2.693 | 3.99E-58 | 0.765027 | -2.9957 | 1.34E-76 | 0.788122 | -2.904 | 2.59E-59 | 0.777778 | -3.302 | 5.68E-27 | 0.8  |
| LOC134466 | 134466 | -2.581 | 1.34E-51 | 0.765027 | -2.6904 | 8.25E-71 | 0.747994 | -2.425 | 1.15E-51 | 0.698413 | -2.267 | 1.57E-17 | 0.55 |
| HOXA2     | 3199   | -2.783 | 1.11E-48 | 0.765027 | -3.0388 | 4.57E-72 | 0.792937 | -2.76  | 2.86E-56 | 0.77381  | -2.585 | 2.25E-20 | 0.7  |
| STXBP6    | 29091  | -2.615 | 1.45E-39 | 0.765027 | -2.5767 | 1.63E-36 | 0.719101 | -2.896 | 5.90E-51 | 0.789683 | -2.358 | 2.07E-12 | 0.7  |
| FOXP2     | 93986  | -2.796 | 2.96E-37 | 0.765027 | -2.8898 | 9.44E-50 | 0.800963 | -2.734 | 2.09E-39 | 0.77381  | -3.104 | 3.98E-14 | 0.8  |
| TESC      | 54997  | -2.461 | 2.31E-36 | 0.765027 | -2.6247 | 1.09E-51 | 0.796148 | -2.471 | 2.73E-35 | 0.793651 | -2.394 | 1.25E-11 | 0.7  |
| C2orf71   | 388939 | -2.338 | 1.10E-35 | 0.765027 | -2.3153 | 3.76E-42 | 0.75923  | -2.59  | 6.40E-57 | 0.837302 | -2.053 | 6.27E-11 | 0.7  |
| PLCXD3    | 345557 | -2.923 | 1.55E-32 | 0.765027 | -3.7114 | 2.22E-53 | 0.823435 | -3.126 | 8.72E-34 | 0.75     | -3.746 | 1.35E-16 | 0.85 |
| CAPN6     | 827    | -3.435 | 3.04E-30 | 0.765027 | -3.828  | 8.39E-34 | 0.781701 | -3.821 | 1.26E-34 | 0.801587 | -4.323 | 7.51E-18 | 0.8  |
| CNTN6     | 27255  | -2.155 | 4.30E-29 | 0.765027 | -2.3395 | 1.85E-43 | 0.802568 | -2.365 | 3.17E-37 | 0.833333 | NA     | NA       | NA   |
| PTX3      | 5806   | -2.822 | 7.99E-27 | 0.765027 | -2.992  | 7.44E-34 | 0.752809 | -3.159 | 8.95E-37 | 0.777778 | -3.673 | 9.28E-18 | 0.85 |



|          |        |        |          |          |         |          |          |        |          |          |        |          |      |
|----------|--------|--------|----------|----------|---------|----------|----------|--------|----------|----------|--------|----------|------|
| IRX1     | 79192  | -2.855 | 1.21E-25 | 0.765027 | -3.1917 | 6.97E-33 | 0.744783 | -3.072 | 1.37E-26 | 0.746032 | -3.061 | 4.49E-09 | 0.75 |
| TUBB2B   | 347733 | -2.567 | 1.54E-24 | 0.765027 | -2.6979 | 2.53E-27 | 0.696629 | -3.091 | 3.60E-34 | 0.742063 | -2.789 | 3.59E-12 | 0.75 |
| NR4A1    | 3164   | -2.023 | 3.53E-22 | 0.765027 | -2.0625 | 1.78E-33 | 0.741573 | -2.063 | 4.86E-26 | 0.734127 | -2.491 | 5.72E-08 | 0.8  |
| DBC1     | 1620   | -2.494 | 1.57E-15 | 0.765027 | -3.2256 | 1.75E-32 | 0.800963 | -2.968 | 5.68E-23 | 0.781746 | -4.003 | 9.41E-10 | 0.8  |
| SCN4B    | 6330   | -2.94  | 1.56E-68 | 0.759563 | -3.2715 | 4.38E-93 | 0.812199 | -2.915 | 4.59E-63 | 0.75     | -3.358 | 1.55E-37 | 0.8  |
| ITPRIPL1 | 150771 | -2.781 | 1.40E-53 | 0.759563 | -2.9807 | 1.42E-82 | 0.792937 | -2.893 | 1.33E-67 | 0.793651 | -3.158 | 1.77E-25 | 0.75 |
| ASAM     | 79827  | -2.574 | 7.53E-42 | 0.759563 | -2.6312 | 1.66E-61 | 0.776886 | -2.508 | 2.52E-46 | 0.769841 | -3.038 | 1.36E-17 | 0.9  |
| ANK2     | 287    | -2.369 | 1.66E-40 | 0.759563 | -2.6277 | 3.44E-66 | 0.764045 | -2.41  | 9.62E-46 | 0.746032 | -2.666 | 1.36E-14 | 0.75 |
| OXGR1    | 27199  | -3.079 | 1.99E-31 | 0.759563 | -2.8189 | 2.43E-27 | 0.714286 | -3.075 | 2.66E-32 | 0.769841 | -2.764 | 5.41E-09 | 0.7  |
| LUZP2    | 338645 | -2.717 | 3.04E-27 | 0.759563 | -3.1731 | 6.56E-44 | 0.792937 | -2.795 | 4.65E-26 | 0.738095 | -3.309 | 2.68E-12 | 0.75 |
| GLB1L3   | 112937 | -2.025 | 2.77E-21 | 0.759563 | -2.185  | 6.99E-38 | 0.786517 | -2.152 | 4.52E-27 | 0.813492 | -2.268 | 1.60E-07 | 0.75 |
| TFPI2    | 7980   | -2.436 | 3.07E-16 | 0.759563 | -2.7772 | 3.73E-22 | 0.794543 | -2.565 | 8.86E-19 | 0.742063 | -3.91  | 1.75E-14 | 0.9  |
| ELF5     | 2001   | -2.877 | 5.03E-12 | 0.759563 | -2.9326 | 1.66E-14 | 0.736758 | -3.012 | 3.89E-16 | 0.833333 | -2.477 | 0.006033 | 0.75 |
| SRPX     | 8406   | -2.816 | 7.21E-55 | 0.754098 | -2.9528 | 1.37E-85 | 0.813804 | -2.68  | 9.91E-55 | 0.761905 | -2.876 | 1.26E-22 | 0.9  |
| TMTC1    | 83857  | -2.995 | 8.43E-48 | 0.754098 | -3.1249 | 9.22E-68 | 0.778491 | -2.845 | 9.17E-46 | 0.72619  | -4.063 | 6.23E-38 | 0.9  |
| MT1M     | 4499   | -2.688 | 1.56E-39 | 0.754098 | -2.9543 | 6.59E-57 | 0.773676 | -2.693 | 2.65E-44 | 0.746032 | -3.246 | 4.19E-25 | 0.9  |
| KLF14    | 136259 | -2.126 | 2.65E-34 | 0.754098 | -2.098  | 5.06E-43 | 0.773676 | -2.008 | 1.82E-30 | 0.757937 | -2.37  | 2.19E-11 | 0.9  |
| EMX2OS   | 196047 | -2.461 | 7.92E-34 | 0.754098 | -2.6109 | 3.85E-52 | 0.760835 | -2.368 | 2.22E-38 | 0.730159 | -2.342 | 3.09E-11 | 0.8  |
| RGS2     | 5997   | -2.273 | 6.12E-31 | 0.754098 | -2.3498 | 1.95E-46 | 0.736758 | -2.463 | 6.39E-44 | 0.801587 | -2.89  | 8.99E-15 | 0.85 |
| APOD     | 347    | -2.986 | 2.56E-30 | 0.754098 | -3.4521 | 1.02E-38 | 0.789727 | -3.051 | 1.62E-32 | 0.757937 | -4.187 | 1.95E-23 | 0.85 |
| MRGPRX3  | 117195 | -2.555 | 1.96E-19 | 0.754098 | -3.0352 | 2.66E-41 | 0.834671 | -2.916 | 6.44E-29 | 0.853175 | -3.193 | 3.03E-07 | 0.8  |
| DNER     | 92737  | -2.529 | 1.24E-18 | 0.754098 | -2.4678 | 5.83E-21 | 0.720706 | -2.717 | 2.36E-26 | 0.765873 | -2.239 | 1.46E-07 | 0.7  |
| UGT8     | 7368   | -2.366 | 5.41E-15 | 0.754098 | -2.174  | 4.34E-14 | 0.701445 | -2.805 | 4.07E-23 | 0.813492 | -2.832 | 5.54E-06 | 0.75 |
| SCRG1    | 11341  | -2.259 | 1.68E-14 | 0.754098 | -2.2364 | 4.50E-15 | 0.733547 | -2.76  | 1.26E-25 | 0.793651 | -2.85  | 1.84E-10 | 0.8  |
| SLC6A15  | 55117  | -2.053 | 5.36E-13 | 0.754098 | NA      | NA       | NA       | -2.594 | 1.58E-26 | 0.793651 | -2.773 | 1.36E-09 | 0.8  |
| CYP2A6   | 1548   | -2.132 | 1.14E-07 | 0.754098 | -2.7577 | 3.32E-13 | 0.789727 | -2.667 | 2.21E-12 | 0.789683 | -2.795 | 2.01E-06 | 0.7  |
| C4orf7   | 260436 | -2.265 | 9.74E-07 | 0.754098 | -2.7379 | 3.95E-10 | 0.778491 | -3.018 | 8.50E-12 | 0.797619 | -3.801 | 7.39E-05 | 0.9  |
| DST      | 667    | -2.671 | 8.37E-59 | 0.748634 | -2.7567 | 1.78E-92 | 0.807384 | -2.699 | 1.30E-70 | 0.801587 | -3.09  | 8.99E-24 | 0.8  |
| AGAP11   | 119385 | -2.53  | 8.20E-49 | 0.748634 | -2.8016 | 3.86E-70 | 0.786517 | -2.515 | 8.21E-49 | 0.730159 | -3.117 | 2.94E-22 | 0.85 |
| ADAMTS1  | 9510   | -2.502 | 6.66E-47 | 0.748634 | -2.6258 | 4.25E-67 | 0.739968 | -2.605 | 1.86E-53 | 0.765873 | -2.991 | 3.30E-23 | 0.85 |
| CLIC5    | 53405  | -2.227 | 1.64E-43 | 0.748634 | -2.5316 | 7.60E-72 | 0.826645 | -2.227 | 2.33E-43 | 0.706349 | -2.964 | 8.76E-23 | 0.85 |
| PDE11A   | 50940  | -2.595 | 1.13E-37 | 0.748634 | -3.0964 | 2.96E-57 | 0.826645 | -3.007 | 2.39E-50 | 0.825397 | -3.102 | 5.22E-18 | 0.75 |
| VIP      | 7432   | -2.072 | 5.03E-35 | 0.748634 | -2.153  | 3.32E-64 | 0.76565  | NA     | NA       | NA       | NA     | NA       | NA   |
| SLITRK2  | 84631  | -2.02  | 3.50E-27 | 0.748634 | NA      | NA       | NA       | NA     | NA       | NA       | -2.249 | 8.47E-08 | 0.85 |

|          |        |        |          |          |         |           |          |        |          |          |        |          |      |
|----------|--------|--------|----------|----------|---------|-----------|----------|--------|----------|----------|--------|----------|------|
| C13orf33 | 84935  | -2.108 | 3.08E-26 | 0.748634 | -2.6063 | 7.65E-59  | 0.813804 | -2.317 | 2.41E-40 | 0.781746 | -2.816 | 7.28E-12 | 0.85 |
| TCEAL2   | 140597 | -2.321 | 1.00E-25 | 0.748634 | -2.8113 | 1.03E-43  | 0.773676 | -2.652 | 3.52E-30 | 0.710317 | -3.095 | 5.70E-15 | 0.8  |
| NPY5R    | 4889   | -3     | 8.39E-22 | 0.748634 | -3.3291 | 1.83E-28  | 0.767255 | -3.626 | 8.37E-32 | 0.821429 | -3.849 | 4.93E-14 | 0.9  |
| HAP1     | 9001   | -2.172 | 3.14E-18 | 0.748634 | -2.1528 | 1.39E-25  | 0.744783 | NA     | NA       | NA       | NA     | NA       | NA   |
| CCL13    | 6357   | -2.397 | 5.78E-17 | 0.748634 | -2.3781 | 2.01E-23  | 0.747994 | -2.408 | 3.12E-22 | 0.81746  | -2.738 | 3.45E-07 | 0.95 |
| IGSF1    | 3547   | -2.739 | 1.95E-15 | 0.748634 | -3.056  | 6.31E-21  | 0.767255 | -3.525 | 7.36E-26 | 0.797619 | -3.242 | 5.28E-08 | 0.7  |
| GPX2     | 2877   | -2.352 | 2.19E-15 | 0.748634 | -2.4628 | 2.17E-19  | 0.741573 | NA     | NA       | NA       | -2.343 | 0.000365 | 0.65 |
| SPRY2    | 10253  | -2.692 | 8.24E-77 | 0.743169 | -2.9063 | 1.31E-109 | 0.802568 | -2.912 | 1.38E-80 | 0.801587 | -3.253 | 3.94E-46 | 0.85 |
| FAM13C   | 220965 | -2.649 | 1.37E-60 | 0.743169 | -2.7881 | 1.91E-75  | 0.757624 | -2.665 | 9.18E-51 | 0.714286 | -2.85  | 7.44E-24 | 0.75 |
| PRELP    | 5549   | -2.408 | 2.36E-34 | 0.743169 | -2.5669 | 1.87E-46  | 0.730337 | -2.378 | 2.05E-37 | 0.65873  | -2.428 | 1.06E-12 | 0.6  |
| CADM3    | 57863  | -3.035 | 6.19E-32 | 0.743169 | -3.8182 | 7.17E-52  | 0.815409 | -3.375 | 4.12E-37 | 0.777778 | -3.948 | 1.69E-20 | 0.8  |
| ATF3     | 467    | -2.293 | 7.58E-31 | 0.743169 | -2.398  | 1.27E-46  | 0.76886  | -2.368 | 6.01E-38 | 0.75     | -3.025 | 1.60E-13 | 0.9  |
| FOS      | 2353   | -2.438 | 1.19E-28 | 0.743169 | -3.0628 | 5.45E-58  | 0.820225 | -3.058 | 1.06E-43 | 0.801587 | -4.173 | 2.52E-22 | 1    |
| FGF9     | 2254   | -2.306 | 1.98E-28 | 0.743169 | -2.3477 | 2.72E-29  | 0.690209 | -2.397 | 1.15E-32 | 0.686508 | -3.028 | 7.83E-18 | 0.75 |
| PPYR1    | 5540   | -2.05  | 1.26E-27 | 0.743169 | -2.1468 | 3.64E-38  | 0.76244  | -2.275 | 3.94E-37 | 0.813492 | -2.203 | 4.08E-11 | 0.8  |
| CACNA2D1 | 781    | -2.699 | 3.70E-25 | 0.743169 | -2.8194 | 4.45E-32  | 0.715891 | -2.674 | 4.99E-27 | 0.734127 | -3.225 | 5.37E-11 | 0.8  |
| TRIM29   | 23650  | -2.468 | 1.19E-15 | 0.743169 | -2.692  | 8.79E-19  | 0.685393 | -2.936 | 1.58E-18 | 0.753968 | -3.278 | 8.63E-06 | 0.7  |
| CLCA2    | 9635   | -2.7   | 4.01E-13 | 0.743169 | -2.9341 | 2.66E-15  | 0.728732 | -2.961 | 8.14E-16 | 0.75     | -4.298 | 8.55E-12 | 0.8  |
| HSD17B2  | 3294   | -2.452 | 7.00E-13 | 0.743169 | -2.6883 | 7.34E-20  | 0.725522 | -2.837 | 2.55E-18 | 0.746032 | -2.094 | 0.002353 | 0.7  |
| MIA      | 8190   | -2.44  | 7.30E-12 | 0.743169 | -2.7067 | 8.63E-16  | 0.70947  | -3.03  | 4.68E-19 | 0.769841 | -3.705 | 1.08E-07 | 0.8  |
| MUC6     | 4588   | -2.517 | 3.22E-08 | 0.743169 | -2.6663 | 1.79E-10  | 0.736758 | -2.236 | 1.69E-06 | 0.678571 | -2.269 | 0.002498 | 0.7  |
| ANXA1    | 301    | -2.501 | 2.46E-63 | 0.737705 | -2.5939 | 1.70E-86  | 0.746388 | -2.639 | 5.93E-73 | 0.789683 | -2.883 | 5.00E-30 | 0.8  |
| DLGAP2   | 9228   | -2.5   | 3.70E-52 | 0.737705 | -2.6941 | 8.04E-65  | 0.75923  | -2.684 | 8.20E-59 | 0.75     | -3.194 | 1.63E-29 | 0.85 |
| BAI3     | 577    | -2.522 | 1.28E-49 | 0.737705 | -2.696  | 2.62E-60  | 0.780096 | -2.63  | 4.37E-53 | 0.75     | -3.327 | 1.27E-26 | 0.8  |
| RBP7     | 116362 | -2.434 | 2.58E-44 | 0.737705 | -2.5769 | 1.08E-58  | 0.701445 | -2.542 | 7.53E-48 | 0.710317 | -2.652 | 2.68E-18 | 0.7  |
| C10orf10 | 11067  | -2.267 | 5.89E-42 | 0.737705 | -2.376  | 4.23E-64  | 0.717496 | -2.174 | 9.09E-41 | 0.68254  | -2.242 | 1.32E-13 | 0.7  |
| MGLL     | 11343  | -2.176 | 1.53E-40 | 0.737705 | -2.2528 | 9.32E-62  | 0.701445 | NA     | NA       | NA       | NA     | NA       | NA   |
| P2RY12   | 64805  | -2.633 | 1.14E-39 | 0.737705 | -3.2573 | 3.37E-65  | 0.82183  | -3.088 | 3.91E-49 | 0.813492 | -3.699 | 7.17E-23 | 0.9  |
| SOX5     | 6660   | -2.375 | 1.04E-27 | 0.737705 | -2.4883 | 1.32E-38  | 0.751204 | -2.369 | 9.55E-36 | 0.777778 | -3.29  | 6.20E-17 | 0.9  |
| C5orf27  | 202299 | -2.201 | 5.21E-21 | 0.737705 | -2.221  | 3.22E-28  | 0.723917 | -2.516 | 9.43E-37 | 0.781746 | -2.299 | 2.13E-09 | 0.8  |
| FGF10    | 2255   | -2.601 | 1.94E-18 | 0.737705 | -3.1883 | 7.24E-30  | 0.744783 | -3.088 | 4.47E-28 | 0.765873 | -3.737 | 4.30E-21 | 0.75 |
| C1orf130 | 400746 | -2.017 | 3.92E-12 | 0.737705 | -2.1646 | 7.86E-18  | 0.699839 | -2.438 | 2.29E-20 | 0.765873 | -2.672 | 2.44E-05 | 0.75 |
| SCN11A   | 11280  | -2.396 | 4.46E-46 | 0.73224  | -2.6044 | 5.56E-68  | 0.783307 | -2.391 | 5.33E-47 | 0.718254 | -3.037 | 1.44E-24 | 0.95 |
| PLA2G4A  | 5321   | -2.541 | 7.26E-45 | 0.73224  | -2.558  | 6.53E-50  | 0.728732 | -2.717 | 3.11E-65 | 0.793651 | -3.372 | 8.43E-33 | 0.8  |

|             |        |        |          |          |         |          |          |        |          |          |        |          |      |
|-------------|--------|--------|----------|----------|---------|----------|----------|--------|----------|----------|--------|----------|------|
| SLC10A6     | 345274 | -2.339 | 6.28E-37 | 0.73224  | -2.519  | 3.02E-53 | 0.76886  | -2.524 | 4.83E-37 | 0.718254 | -2.955 | 1.39E-17 | 0.75 |
| FAT2        | 2196   | -3.431 | 5.60E-33 | 0.73224  | -3.7888 | 1.79E-44 | 0.784912 | -3.651 | 1.36E-36 | 0.781746 | -4.566 | 7.93E-18 | 0.8  |
| DNAH9       | 1770   | -2.271 | 1.23E-26 | 0.73224  | -2.7032 | 2.05E-39 | 0.770465 | -2.615 | 1.40E-36 | 0.730159 | -2.896 | 1.87E-15 | 0.75 |
| KCNH8       | 131096 | -2.67  | 1.22E-22 | 0.73224  | -3.0566 | 6.68E-39 | 0.789727 | -3.289 | 1.41E-37 | 0.833333 | -3.492 | 1.01E-09 | 0.8  |
| C8orf47     | 203111 | -2.099 | 1.61E-18 | 0.73224  | NA      | NA       | NA       | -2.297 | 2.95E-22 | 0.753968 | -2.669 | 1.29E-09 | 0.8  |
| ANKRD29     | 147463 | -2.878 | 4.68E-57 | 0.726776 | -3.0903 | 2.05E-69 | 0.757624 | -2.985 | 1.92E-62 | 0.738095 | -3.393 | 2.20E-30 | 0.75 |
| TDRD10      | 126668 | -2.553 | 6.31E-52 | 0.726776 | -2.8058 | 1.73E-72 | 0.757624 | -2.412 | 3.35E-45 | 0.68254  | -2.633 | 3.96E-24 | 0.75 |
| MYLK        | 4638   | -2.458 | 2.51E-50 | 0.726776 | -2.595  | 1.76E-71 | 0.756019 | -2.511 | 2.11E-56 | 0.734127 | -2.733 | 1.22E-18 | 0.85 |
| CASP12      | 120329 | -2.245 | 1.43E-47 | 0.726776 | -2.3609 | 7.67E-79 | 0.794543 | -2.007 | 2.49E-41 | 0.702381 | -2.224 | 3.03E-14 | 0.7  |
| CABP1       | 9478   | -2.287 | 1.70E-41 | 0.726776 | -2.3886 | 2.26E-67 | 0.76886  | -2.155 | 1.80E-41 | 0.730159 | NA     | NA       | NA   |
| ID4         | 3400   | -2.802 | 2.34E-39 | 0.726776 | -3.1842 | 7.07E-54 | 0.754414 | -3.14  | 6.48E-49 | 0.769841 | -3.239 | 3.02E-20 | 0.7  |
| CCDC85A     | 114800 | -2.292 | 7.76E-39 | 0.726776 | -2.6569 | 1.38E-57 | 0.764045 | -2.538 | 5.90E-48 | 0.753968 | -3.171 | 2.03E-23 | 0.9  |
| HFM1        | 164045 | -2     | 9.93E-31 | 0.726776 | -2.2125 | 6.59E-49 | 0.756019 | -2.206 | 1.28E-38 | 0.753968 | -2.996 | 9.53E-19 | 0.9  |
| KCNMB2      | 10242  | -2.181 | 1.51E-30 | 0.726776 | -2.2945 | 1.08E-46 | 0.780096 | -2.166 | 9.72E-31 | 0.738095 | -2.255 | 2.11E-09 | 0.75 |
| SNCG        | 6623   | -2.478 | 2.42E-30 | 0.726776 | -2.8181 | 9.40E-38 | 0.739968 | -2.159 | 1.38E-20 | 0.642857 | -2.138 | 2.60E-08 | 0.6  |
| PREX2       | 80243  | -2.694 | 5.46E-30 | 0.726776 | -3.2459 | 5.39E-50 | 0.810594 | -2.774 | 9.00E-34 | 0.77381  | -3.808 | 1.53E-17 | 0.9  |
| RAB3C       | 115827 | -2.191 | 4.52E-28 | 0.726776 | -2.3101 | 3.81E-32 | 0.743178 | -2.17  | 8.55E-24 | 0.686508 | -2.769 | 9.17E-12 | 0.95 |
| PDE8B       | 8622   | -2.341 | 4.45E-27 | 0.726776 | -2.5438 | 6.24E-35 | 0.696629 | -2.418 | 1.35E-28 | 0.698413 | -2.628 | 3.58E-11 | 0.7  |
| MRC1        | 4360   | -2.3   | 1.72E-25 | 0.726776 | -2.3571 | 2.17E-35 | 0.725522 | -2.209 | 3.15E-27 | 0.694444 | -2.449 | 1.46E-08 | 0.85 |
| EPHA7       | 2045   | -2.243 | 1.34E-21 | 0.726776 | NA      | NA       | NA       | -2.023 | 4.99E-19 | 0.654762 | NA     | NA       | NA   |
| STON1-GTF2A | 286749 | -2.025 | 3.35E-11 | 0.726776 | -2.1009 | 4.09E-18 | 0.720706 | -2.139 | 1.11E-14 | 0.734127 | NA     | NA       | NA   |
| KRT17       | 3872   | -2.338 | 1.13E-08 | 0.726776 | -2.7519 | 3.37E-14 | 0.720706 | -2.896 | 7.08E-12 | 0.769841 | -3.511 | 0.000387 | 0.8  |
| HMGCS2      | 3158   | -2.611 | 2.52E-07 | 0.726776 | -3.4769 | 1.78E-14 | 0.760835 | -2.63  | 1.63E-08 | 0.75     | -3.93  | 8.36E-05 | 0.9  |
| APCDD1      | 147495 | -2.448 | 1.82E-63 | 0.721311 | -2.537  | 5.46E-76 | 0.714286 | -2.479 | 1.92E-57 | 0.702381 | -2.453 | 2.97E-24 | 0.65 |
| ALDOC       | 230    | -2.554 | 1.83E-40 | 0.721311 | -2.4135 | 2.32E-45 | 0.686998 | -2.345 | 1.17E-39 | 0.670635 | NA     | NA       | NA   |
| FLJ42875    | 440556 | -2.319 | 5.26E-40 | 0.721311 | -2.4934 | 5.40E-61 | 0.76244  | -2.174 | 1.05E-36 | 0.670635 | -2.984 | 9.10E-23 | 0.85 |
| TBX15       | 6913   | -2.005 | 7.33E-39 | 0.721311 | -2.1946 | 1.36E-61 | 0.733547 | -2.034 | 2.98E-44 | 0.710317 | NA     | NA       | NA   |
| TRPM6       | 140803 | -2.717 | 9.24E-36 | 0.721311 | -3.1145 | 9.07E-53 | 0.751204 | -2.959 | 3.74E-42 | 0.72619  | -3.89  | 3.27E-26 | 0.8  |
| PTH1R       | 5745   | -2.546 | 8.23E-35 | 0.721311 | -2.8167 | 5.42E-55 | 0.781701 | -2.497 | 1.13E-39 | 0.734127 | -2.094 | 8.89E-10 | 0.65 |
| DOCK11      | 139818 | -2.126 | 7.68E-33 | 0.721311 | -2.1337 | 4.01E-54 | 0.751204 | -2.05  | 2.12E-39 | 0.761905 | -2.28  | 1.01E-09 | 0.75 |
| ANGPTL4     | 51129  | -2.491 | 9.33E-30 | 0.721311 | -2.5692 | 8.16E-38 | 0.715891 | -2.581 | 2.67E-31 | 0.690476 | -2.157 | 7.08E-09 | 0.55 |
| MAPK4       | 5596   | -2.717 | 1.97E-21 | 0.721311 | -2.9447 | 4.92E-23 | 0.720706 | -3.365 | 8.88E-35 | 0.801587 | -3.549 | 3.97E-15 | 0.7  |
| KRT15       | 3866   | -2.083 | 3.05E-07 | 0.721311 | -2.4301 | 6.07E-14 | 0.741573 | -2.643 | 2.11E-12 | 0.769841 | -3.984 | 0.000117 | 0.85 |
| NR3C2       | 4306   | -2.77  | 2.68E-63 | 0.715847 | -2.793  | 1.67E-73 | 0.720706 | -2.597 | 7.85E-64 | 0.714286 | -3.011 | 2.19E-31 | 0.75 |

|            |        |        |          |          |         |           |          |        |          |          |        |          |      |
|------------|--------|--------|----------|----------|---------|-----------|----------|--------|----------|----------|--------|----------|------|
| TSPAN7     | 7102   | -2.563 | 7.57E-56 | 0.715847 | -3.0803 | 1.25E-80  | 0.804173 | -2.891 | 1.21E-57 | 0.746032 | -3.505 | 8.17E-33 | 0.85 |
| SCN3B      | 55800  | -2.749 | 2.64E-50 | 0.715847 | -3.2695 | 1.76E-68  | 0.815409 | -2.764 | 2.68E-46 | 0.702381 | -3.366 | 5.14E-27 | 0.75 |
| FAM149A    | 25854  | -2.313 | 1.23E-48 | 0.715847 | -2.5175 | 3.41E-62  | 0.707865 | -2.479 | 6.29E-51 | 0.710317 | -2.937 | 3.27E-22 | 0.8  |
| CLDN11     | 5010   | -2.807 | 1.76E-44 | 0.715847 | -3.4048 | 1.16E-76  | 0.817014 | -2.919 | 4.42E-46 | 0.702381 | -3.72  | 9.61E-25 | 0.8  |
| SLC25A27   | 9481   | -2.746 | 3.26E-44 | 0.715847 | -2.7894 | 3.41E-59  | 0.704655 | -2.745 | 8.05E-46 | 0.694444 | -2.829 | 2.15E-22 | 0.7  |
| DHDPSL     | 112817 | -2.602 | 1.46E-30 | 0.715847 | -2.558  | 1.45E-34  | 0.685393 | -2.531 | 8.09E-34 | 0.714286 | -2.46  | 4.88E-13 | 0.65 |
| PKNOX2     | 63876  | -2.247 | 5.30E-30 | 0.715847 | -2.3972 | 9.37E-36  | 0.698234 | -2.246 | 1.28E-29 | 0.722222 | -2.776 | 5.69E-18 | 0.8  |
| EGR3       | 1960   | -2.372 | 9.24E-26 | 0.715847 | -2.7197 | 2.57E-41  | 0.757624 | -2.542 | 7.32E-32 | 0.730159 | -4.044 | 2.45E-18 | 0.95 |
| SMOC1      | 64093  | -2.615 | 1.11E-24 | 0.715847 | -2.551  | 3.85E-21  | 0.674157 | -2.924 | 1.04E-32 | 0.710317 | -2.747 | 3.48E-14 | 0.7  |
| GPR88      | 54112  | -2.059 | 1.06E-21 | 0.715847 | -2.3017 | 1.28E-30  | 0.772071 | -2.095 | 6.73E-27 | 0.746032 | -2.536 | 4.91E-11 | 0.85 |
| GPM6A      | 2823   | -2.523 | 7.22E-21 | 0.715847 | -3.0622 | 2.33E-31  | 0.794543 | -3.062 | 1.03E-31 | 0.753968 | -3.547 | 6.78E-14 | 0.8  |
| LGR6       | 59352  | -2.526 | 6.52E-17 | 0.715847 | -2.8345 | 3.84E-24  | 0.739968 | -2.685 | 2.20E-19 | 0.706349 | -3.622 | 2.57E-09 | 0.8  |
| PPP1R12B   | 4660   | -2.192 | 1.06E-78 | 0.710383 | -2.2857 | 3.19E-115 | 0.722311 | -2.166 | 2.31E-77 | 0.670635 | -2.301 | 2.29E-27 | 0.65 |
| CORO2B     | 10391  | -2.507 | 1.01E-60 | 0.710383 | -2.837  | 3.26E-87  | 0.776886 | -2.422 | 3.75E-57 | 0.698413 | -2.91  | 1.04E-28 | 0.8  |
| PER1       | 5187   | -2.183 | 2.68E-46 | 0.710383 | -2.2971 | 1.05E-75  | 0.725522 | -2.181 | 8.21E-49 | 0.674603 | -2.261 | 3.64E-18 | 0.8  |
| NCRNA00086 | 399668 | -2.561 | 4.05E-43 | 0.710383 | -2.7946 | 1.01E-58  | 0.76565  | -2.825 | 1.35E-43 | 0.718254 | -2.557 | 6.59E-14 | 0.7  |
| ASXL3      | 80816  | -2.634 | 5.16E-42 | 0.710383 | -2.7243 | 1.21E-46  | 0.711075 | -2.635 | 3.02E-44 | 0.738095 | -2.851 | 1.67E-16 | 0.8  |
| EGR2       | 1959   | -2.239 | 1.08E-30 | 0.710383 | -2.4625 | 4.98E-55  | 0.770465 | -2.39  | 2.43E-39 | 0.781746 | -3.043 | 3.68E-14 | 0.9  |
| ADAMTS18   | 170692 | -2.462 | 2.96E-24 | 0.710383 | -2.97   | 1.73E-36  | 0.75923  | -2.684 | 5.08E-28 | 0.72619  | -3.575 | 9.67E-17 | 0.85 |
| CCL21      | 6366   | -3.131 | 3.24E-24 | 0.710383 | -4.0901 | 4.07E-38  | 0.808989 | -3.375 | 3.83E-28 | 0.742063 | -4.999 | 2.90E-17 | 0.85 |
| NPM2       | 10361  | -2.069 | 1.63E-20 | 0.710383 | NA      | NA        | NA       | NA     | NA       | NA       | NA     | NA       | NA   |
| LRP1B      | 53353  | -2.351 | 1.24E-12 | 0.710383 | -2.5863 | 1.57E-16  | 0.711075 | -2.477 | 6.69E-14 | 0.706349 | -2.75  | 1.20E-08 | 0.7  |
| SLC34A2    | 10568  | -2.532 | 1.12E-09 | 0.710383 | -2.7007 | 1.11E-12  | 0.704655 | -3.046 | 1.30E-13 | 0.753968 | -3.102 | 0.001307 | 0.65 |
| GPM6B      | 2824   | -2.23  | 3.95E-36 | 0.704918 | -2.2555 | 4.29E-44  | 0.707865 | -2.41  | 1.45E-40 | 0.706349 | -2.368 | 1.92E-10 | 0.7  |
| FAM189A2   | 9413   | -2.508 | 1.91E-34 | 0.704918 | -2.9388 | 3.99E-41  | 0.699839 | -2.833 | 2.98E-33 | 0.694444 | -3.349 | 1.90E-14 | 0.7  |
| PACRG      | 135138 | -2.187 | 7.67E-32 | 0.704918 | -2.4718 | 8.34E-47  | 0.711075 | -2.281 | 2.56E-32 | 0.650794 | -2.773 | 2.30E-14 | 0.85 |
| WNT11      | 7481   | -2.355 | 5.19E-26 | 0.704918 | -2.4318 | 1.76E-28  | 0.70626  | -2.434 | 4.49E-28 | 0.710317 | NA     | NA       | NA   |
| HRASLS5    | 117245 | -2.751 | 1.08E-24 | 0.704918 | -3.5466 | 4.68E-37  | 0.770465 | -3.065 | 2.07E-29 | 0.746032 | -3.778 | 1.55E-16 | 0.8  |
| HRCT1      | 646962 | -2.379 | 1.51E-19 | 0.704918 | -2.4626 | 6.45E-27  | 0.739968 | -2.707 | 5.94E-30 | 0.742063 | -2.776 | 2.39E-12 | 0.85 |
| SLC28A3    | 64078  | -2.599 | 1.96E-13 | 0.704918 | -2.8232 | 8.18E-20  | 0.728732 | -3.393 | 9.79E-25 | 0.809524 | -4.342 | 1.44E-09 | 0.95 |
| SULT1C3    | 442038 | NA     | NA       | NA       | -2.1162 | 3.60E-28  | 0.991974 | NA     | NA       | NA       | NA     | NA       | NA   |
| MYOZ2      | 51778  | NA     | NA       | NA       | -2.1139 | 8.99E-47  | 0.987159 | -2.047 | 2.63E-33 | 0.97619  | NA     | NA       | NA   |
| HBG1       | 3047   | NA     | NA       | NA       | -2.1468 | 1.10E-58  | 0.983949 | NA     | NA       | NA       | NA     | NA       | NA   |
| ALAS2      | 212    | NA     | NA       | NA       | -2.1328 | 6.87E-58  | 0.982343 | NA     | NA       | NA       | NA     | NA       | NA   |

|            |        |        |          |          |         |          |          |        |          |          |        |          |      |
|------------|--------|--------|----------|----------|---------|----------|----------|--------|----------|----------|--------|----------|------|
| SRL        | 6345   | NA     | NA       | NA       | -2.2124 | 2.82E-53 | 0.982343 | NA     | NA       | NA       | -2.36  | 2.18E-13 | 1    |
| KLK3       | 354    | NA     | NA       | NA       | -2.5396 | 8.75E-25 | 0.932584 | -2.335 | 4.52E-16 | 0.93254  | -2.084 | 0.007105 | 0.8  |
| MUC7       | 4589   | NA     | NA       | NA       | -2.096  | 8.03E-15 | 0.906902 | -2.03  | 5.36E-10 | 0.873016 | -2.511 | 0.002153 | 0.95 |
| PMP2       | 5375   | NA     | NA       | NA       | -2.0986 | 5.31E-39 | 0.889246 | -2.152 | 2.26E-33 | 0.869048 | -2.713 | 1.87E-11 | 1    |
| NXNL1      | 115861 | NA     | NA       | NA       | -2.0242 | 1.17E-68 | 0.879615 | NA     | NA       | NA       | NA     | NA       | NA   |
| HRC        | 3270   | NA     | NA       | NA       | -2.0333 | 9.98E-36 | 0.861958 | NA     | NA       | NA       | NA     | NA       | NA   |
| SPATA22    | 84690  | NA     | NA       | NA       | -2.0945 | 3.07E-36 | 0.857143 | -2.131 | 5.44E-30 | 0.84127  | NA     | NA       | NA   |
| FCER2      | 2208   | NA     | NA       | NA       | -2.4782 | 4.12E-23 | 0.820225 | -2.385 | 4.64E-19 | 0.809524 | -3.097 | 3.78E-08 | 0.9  |
| RSPO1      | 284654 | NA     | NA       | NA       | -2.3313 | 1.27E-22 | 0.820225 | -2.12  | 3.89E-16 | 0.813492 | -2.801 | 1.43E-05 | 0.95 |
| C2CD4B     | 388125 | NA     | NA       | NA       | -2.1152 | 9.24E-25 | 0.808989 | NA     | NA       | NA       | NA     | NA       | NA   |
| CUX2       | 23316  | NA     | NA       | NA       | -2.1338 | 4.51E-18 | 0.808989 | -2.134 | 7.69E-15 | 0.821429 | -2.512 | 2.60E-05 | 0.85 |
| KIF25      | 3834   | NA     | NA       | NA       | -2.0589 | 1.43E-31 | 0.799358 | -2.099 | 2.16E-26 | 0.797619 | -2.619 | 9.28E-09 | 0.8  |
| MYL7       | 58498  | NA     | NA       | NA       | -2.404  | 1.66E-22 | 0.799358 | -2.376 | 7.99E-17 | 0.809524 | -2.76  | 3.25E-05 | 0.9  |
| MFAP4      | 4239   | -2.587 | 3.99E-32 | 0.644809 | -3.2331 | 8.54E-54 | 0.797753 | -2.667 | 1.01E-35 | 0.702381 | -3.376 | 3.94E-18 | 0.7  |
| DTX1       | 1840   | -2.333 | 4.33E-38 | 0.699454 | -2.5011 | 1.73E-67 | 0.792937 | -2.414 | 1.23E-47 | 0.75     | -2.36  | 2.58E-12 | 0.75 |
| NR4A3      | 8013   | NA     | NA       | NA       | -2.0181 | 3.10E-29 | 0.792937 | -2.1   | 1.16E-23 | 0.825397 | -2.568 | 4.45E-07 | 0.8  |
| NCRNA00110 | 642976 | NA     | NA       | NA       | -2.4357 | 6.50E-28 | 0.791332 | -2.419 | 4.84E-22 | 0.781746 | -2.707 | 1.84E-06 | 0.8  |
| LRFN5      | 145581 | -2.53  | 5.43E-40 | 0.688525 | -3.0006 | 2.65E-58 | 0.789727 | -2.697 | 7.40E-43 | 0.718254 | -3.003 | 3.42E-18 | 0.7  |
| GPR182     | 11318  | NA     | NA       | NA       | -2.1124 | 5.50E-58 | 0.789727 | NA     | NA       | NA       | -2.352 | 1.04E-09 | 0.85 |
| C21orf34   | 388815 | -2.827 | 1.22E-55 | 0.699454 | -3.1199 | 5.66E-81 | 0.781701 | -2.819 | 7.62E-57 | 0.730159 | -3.27  | 3.20E-31 | 0.85 |
| SLCO1C1    | 53919  | NA     | NA       | NA       | -2.1405 | 8.60E-52 | 0.781701 | NA     | NA       | NA       | -2.291 | 9.21E-10 | 0.8  |
| EFHA2      | 286097 | -2.544 | 2.49E-54 | 0.677596 | -2.8446 | 2.09E-76 | 0.780096 | -2.703 | 3.13E-59 | 0.730159 | -3.136 | 7.74E-24 | 0.7  |
| DARC       | 2532   | -2.936 | 3.34E-31 | 0.68306  | -4.1438 | 7.69E-45 | 0.780096 | -3.283 | 1.56E-29 | 0.734127 | -4.168 | 4.82E-24 | 0.85 |
| ITM2A      | 9452   | -2.584 | 1.59E-52 | 0.68306  | -3.0084 | 1.45E-79 | 0.773676 | -2.749 | 8.60E-56 | 0.68254  | -3.059 | 9.56E-36 | 0.8  |
| KCNC2      | 3747   | NA     | NA       | NA       | -2.4996 | 8.80E-11 | 0.772071 | -2.459 | 8.30E-10 | 0.769841 | -2.097 | 0.009739 | 0.7  |
| RASL10A    | 10633  | NA     | NA       | NA       | -2.0033 | 1.45E-37 | 0.770465 | NA     | NA       | NA       | NA     | NA       | NA   |
| CCBE1      | 147372 | -2.329 | 6.08E-30 | 0.699454 | -2.3781 | 5.67E-44 | 0.76886  | -2.357 | 1.19E-32 | 0.714286 | -2.085 | 1.72E-07 | 0.55 |
| GREM2      | 64388  | -2.426 | 1.47E-29 | 0.699454 | -3.0322 | 3.02E-48 | 0.767255 | -2.444 | 1.97E-30 | 0.623016 | -2.992 | 9.30E-14 | 0.85 |
| TCEAL7     | 56849  | -2.454 | 2.27E-53 | 0.677596 | -2.7203 | 1.43E-84 | 0.76565  | -2.413 | 2.13E-55 | 0.662698 | -2.715 | 1.60E-24 | 0.8  |
| SEMA3D     | 223117 | -2.828 | 1.17E-35 | 0.672131 | -3.1844 | 5.21E-55 | 0.76565  | -3.199 | 3.39E-49 | 0.797619 | -3.358 | 2.94E-19 | 0.8  |
| PRKAR2B    | 5577   | NA     | NA       | NA       | -2.1151 | 2.89E-41 | 0.76565  | -2.06  | 1.87E-30 | 0.77381  | -2.219 | 1.04E-07 | 0.9  |
| CRB2       | 286204 | NA     | NA       | NA       | -2.4031 | 6.58E-41 | 0.76244  | -2.242 | 1.16E-27 | 0.753968 | -2.799 | 1.69E-08 | 0.9  |
| ZFP36      | 7538   | NA     | NA       | NA       | -2.3122 | 5.45E-61 | 0.760835 | -2.169 | 3.91E-40 | 0.722222 | -2.932 | 9.52E-17 | 0.85 |
| NPAS4      | 266743 | NA     | NA       | NA       | -2.0179 | 1.67E-42 | 0.75923  | -2.182 | 6.91E-45 | 0.81746  | -2.374 | 4.14E-11 | 0.85 |

|         |        |        |          |          |         |           |          |        |          |          |        |          |      |
|---------|--------|--------|----------|----------|---------|-----------|----------|--------|----------|----------|--------|----------|------|
| GRRP1   | 79927  | -2.027 | 2.10E-37 | 0.622951 | -2.4807 | 3.67E-69  | 0.756019 | -2.119 | 1.32E-35 | 0.619048 | -2.095 | 2.65E-13 | 0.7  |
| EDNRB   | 1910   | -2.361 | 1.37E-57 | 0.655738 | -2.6632 | 4.83E-79  | 0.754414 | -2.502 | 3.61E-55 | 0.690476 | -2.829 | 1.10E-32 | 0.9  |
| CDH12   | 1010   | NA     | NA       | NA       | -2.0013 | 3.22E-34  | 0.754414 | NA     | NA       | NA       | NA     | NA       | NA   |
| C7      | 730    | -2.671 | 7.84E-19 | 0.644809 | -3.9941 | 7.95E-33  | 0.754414 | -3.15  | 1.68E-22 | 0.68254  | -4.065 | 1.60E-15 | 0.8  |
| SOX17   | 64321  | NA     | NA       | NA       | -2.2884 | 8.64E-72  | 0.752809 | NA     | NA       | NA       | -2.265 | 5.36E-14 | 0.75 |
| IGF1    | 3479   | -2.5   | 2.19E-34 | 0.677596 | -3.0803 | 3.28E-53  | 0.752809 | -2.592 | 2.06E-38 | 0.690476 | -3.84  | 1.79E-24 | 0.9  |
| GPR97   | 222487 | -2.175 | 1.24E-24 | 0.699454 | -2.3835 | 6.76E-44  | 0.752809 | -2.322 | 5.89E-31 | 0.734127 | NA     | NA       | NA   |
| LCN10   | 414332 | -2.307 | 2.50E-25 | 0.63388  | -2.7943 | 3.88E-47  | 0.751204 | -2.412 | 6.89E-29 | 0.65873  | -2.972 | 8.78E-18 | 0.8  |
| RIMBP2  | 23504  | -2.276 | 4.77E-27 | 0.68306  | -2.6164 | 1.13E-42  | 0.749599 | -2.53  | 2.85E-40 | 0.68254  | -2.842 | 1.49E-18 | 0.7  |
| COL4A6  | 1288   | -2.441 | 8.82E-22 | 0.677596 | -2.998  | 2.06E-31  | 0.749599 | -2.939 | 5.11E-30 | 0.746032 | -3.651 | 1.51E-13 | 0.75 |
| FCN2    | 2220   | NA     | NA       | NA       | -2.1822 | 8.71E-22  | 0.749599 | NA     | NA       | NA       | NA     | NA       | NA   |
| RBMS3   | 27303  | -2.577 | 3.06E-47 | 0.677596 | -2.7844 | 1.34E-71  | 0.747994 | -2.519 | 4.51E-56 | 0.734127 | -2.91  | 2.34E-23 | 0.85 |
| ABCY1   | 5243   | -2.302 | 8.23E-37 | 0.63388  | -2.8656 | 3.10E-59  | 0.747994 | -2.477 | 2.73E-37 | 0.654762 | -3.136 | 1.29E-19 | 0.8  |
| ISM1    | 140862 | -2.472 | 2.06E-47 | 0.672131 | -2.8698 | 1.04E-64  | 0.746388 | -2.553 | 1.30E-44 | 0.678571 | -3.009 | 1.74E-20 | 0.75 |
| KLHL4   | 56062  | NA     | NA       | NA       | -2.2231 | 5.66E-46  | 0.744783 | -2.005 | 1.04E-31 | 0.68254  | -2.219 | 1.11E-08 | 0.85 |
| DBX2    | 440097 | -2.375 | 1.67E-36 | 0.655738 | -2.7452 | 1.06E-55  | 0.743178 | -2.349 | 5.49E-36 | 0.650794 | -3.028 | 7.81E-19 | 0.75 |
| TGFBR2  | 7048   | -2.244 | 5.26E-58 | 0.655738 | -2.4958 | 3.33E-96  | 0.741573 | -2.268 | 1.25E-61 | 0.654762 | -2.66  | 4.11E-26 | 0.8  |
| SEMA6D  | 80031  | -2.279 | 1.53E-40 | 0.644809 | -2.708  | 2.94E-54  | 0.741573 | -2.547 | 2.46E-48 | 0.714286 | -2.97  | 2.52E-22 | 0.8  |
| TWIST2  | 117581 | -2.119 | 5.26E-27 | 0.63388  | -2.3966 | 3.57E-48  | 0.741573 | -2.088 | 1.80E-30 | 0.666667 | -2.297 | 1.16E-10 | 0.7  |
| ABI3BP  | 25890  | -2.476 | 1.10E-29 | 0.666667 | -2.9172 | 5.75E-45  | 0.741573 | -2.517 | 8.47E-35 | 0.686508 | -3.477 | 8.92E-19 | 0.8  |
| PM20D1  | 148811 | NA     | NA       | NA       | -2.0072 | 2.55E-41  | 0.738363 | NA     | NA       | NA       | -2.605 | 1.51E-09 | 0.8  |
| ST8SIA2 | 8128   | NA     | NA       | NA       | -2.0937 | 3.14E-20  | 0.738363 | NA     | NA       | NA       | NA     | NA       | NA   |
| HP      | 3240   | NA     | NA       | NA       | -2.0608 | 7.34E-13  | 0.738363 | NA     | NA       | NA       | NA     | NA       | NA   |
| TMEM220 | 388335 | -2.388 | 7.30E-71 | 0.672131 | -2.6639 | 4.27E-101 | 0.736758 | -2.686 | 2.42E-84 | 0.77381  | -2.926 | 2.98E-37 | 0.8  |
| FAM70A  | 55026  | -2.639 | 1.36E-45 | 0.699454 | -2.7892 | 2.64E-68  | 0.736758 | -2.543 | 1.97E-52 | 0.734127 | -2.797 | 4.30E-20 | 0.7  |
| VWCE    | 220001 | -2.175 | 2.59E-39 | 0.677596 | -2.3707 | 1.85E-67  | 0.736758 | -2.202 | 1.07E-42 | 0.662698 | -2.045 | 9.56E-12 | 0.75 |
| SLC47A2 | 146802 | NA     | NA       | NA       | -2.1043 | 4.81E-50  | 0.736758 | -2.03  | 1.63E-40 | 0.694444 | -2.262 | 1.10E-16 | 0.8  |
| CALCR   | 799    | NA     | NA       | NA       | -2.1177 | 9.88E-35  | 0.736758 | NA     | NA       | NA       | NA     | NA       | NA   |
| SCN7A   | 6332   | -2.675 | 9.04E-25 | 0.677596 | -3.3781 | 7.72E-38  | 0.735152 | -2.72  | 6.51E-26 | 0.678571 | -4.092 | 2.26E-18 | 0.85 |
| PDLIM3  | 27295  | NA     | NA       | NA       | -2.1172 | 3.58E-47  | 0.733547 | -2.031 | 2.71E-38 | 0.746032 | NA     | NA       | NA   |
| CYP26B1 | 56603  | NA     | NA       | NA       | -2.12   | 5.01E-40  | 0.731942 | -2.366 | 1.88E-38 | 0.793651 | NA     | NA       | NA   |
| CALN1   | 83698  | NA     | NA       | NA       | -2.5209 | 3.14E-36  | 0.731942 | -2.425 | 1.23E-31 | 0.72619  | -2.806 | 1.32E-13 | 0.8  |
| IGJ     | 3512   | -2.557 | 9.89E-15 | 0.68306  | -2.8182 | 4.13E-22  | 0.731942 | -2.5   | 1.37E-17 | 0.678571 | -3.8   | 3.54E-08 | 0.75 |
| FAM162B | 221303 | -2.313 | 5.69E-50 | 0.672131 | -2.5892 | 2.07E-78  | 0.730337 | -2.3   | 3.16E-48 | 0.623016 | -2.341 | 6.79E-20 | 0.7  |

|           |        |        |          |          |         |           |          |        |          |          |        |          |      |
|-----------|--------|--------|----------|----------|---------|-----------|----------|--------|----------|----------|--------|----------|------|
| WDR86     | 349136 | -2.483 | 1.62E-31 | 0.672131 | -2.664  | 2.39E-49  | 0.730337 | -2.292 | 1.25E-26 | 0.65873  | -2.386 | 3.61E-10 | 0.7  |
| KCNA6     | 3742   | -2.25  | 8.15E-33 | 0.666667 | -2.6246 | 1.39E-48  | 0.730337 | -2.474 | 2.06E-39 | 0.694444 | -2.792 | 1.68E-17 | 0.7  |
| CTSG      | 1511   | -2.417 | 2.76E-19 | 0.655738 | -2.9139 | 1.51E-32  | 0.730337 | -2.437 | 8.35E-22 | 0.674603 | -3.482 | 3.98E-13 | 0.85 |
| TCN1      | 6947   | NA     | NA       | NA       | -2.3553 | 9.06E-10  | 0.730337 | -2.768 | 3.49E-12 | 0.793651 | -3.677 | 1.21E-05 | 0.8  |
| CXCR2     | 3579   | NA     | NA       | NA       | -2.0092 | 6.71E-48  | 0.728732 | NA     | NA       | NA       | -2.082 | 1.40E-11 | 0.85 |
| HRNR      | 388697 | -2.026 | 1.68E-29 | 0.661202 | -2.2976 | 1.04E-43  | 0.728732 | -2.068 | 2.84E-29 | 0.638889 | -2.768 | 6.99E-13 | 0.75 |
| ZNF676    | 163223 | -2.366 | 5.32E-22 | 0.688525 | -2.7279 | 5.80E-34  | 0.728732 | -2.46  | 1.10E-29 | 0.706349 | -3.198 | 1.39E-19 | 0.75 |
| CDH23     | 64072  | -2.178 | 7.43E-37 | 0.644809 | -2.5237 | 1.29E-56  | 0.727127 | -2.183 | 6.41E-38 | 0.650794 | -2.255 | 4.00E-12 | 0.7  |
| SV2B      | 9899   | -2.505 | 4.02E-38 | 0.68306  | -2.6973 | 3.44E-48  | 0.727127 | -2.39  | 6.46E-38 | 0.642857 | -2.62  | 1.73E-17 | 0.75 |
| GPRASP1   | 9737   | -2.342 | 2.76E-65 | 0.693989 | -2.554  | 1.48E-88  | 0.725522 | -2.369 | 1.04E-60 | 0.650794 | -2.608 | 9.62E-25 | 0.75 |
| GPR109B   | 8843   | -2.188 | 6.87E-41 | 0.688525 | -2.3848 | 5.29E-60  | 0.725522 | -2.241 | 2.98E-44 | 0.65873  | -2.641 | 4.75E-17 | 0.8  |
| LOC643763 | 643763 | NA     | NA       | NA       | -2.1828 | 1.50E-29  | 0.725522 | -2.27  | 8.88E-30 | 0.718254 | -2.245 | 6.80E-09 | 0.75 |
| C5orf4    | 10826  | -2.642 | 1.80E-47 | 0.699454 | -2.883  | 1.04E-63  | 0.722311 | -2.669 | 3.64E-53 | 0.662698 | -3.44  | 1.04E-34 | 0.8  |
| GRM7      | 2917   | NA     | NA       | NA       | -2.1866 | 7.47E-41  | 0.722311 | NA     | NA       | NA       | -2.537 | 4.94E-16 | 0.85 |
| CPB1      | 1360   | NA     | NA       | NA       | -2.1537 | 5.70E-05  | 0.722311 | NA     | NA       | NA       | NA     | NA       | NA   |
| IGFN1     | 91156  | NA     | NA       | NA       | -2.0558 | 5.89E-26  | 0.720706 | NA     | NA       | NA       | -2.516 | 6.47E-10 | 0.85 |
| CSMD1     | 64478  | NA     | NA       | NA       | -2.306  | 1.01E-21  | 0.720706 | -2.299 | 1.91E-20 | 0.690476 | NA     | NA       | NA   |
| AQP1      | 358    | -2.28  | 7.57E-62 | 0.63388  | -2.549  | 6.03E-86  | 0.719101 | -2.268 | 2.53E-57 | 0.650794 | -2.344 | 6.22E-27 | 0.75 |
| SHE       | 126669 | -2.171 | 1.10E-53 | 0.628415 | -2.4358 | 2.45E-82  | 0.719101 | -2.095 | 2.75E-51 | 0.599206 | -2.499 | 2.16E-22 | 0.75 |
| CREB5     | 9586   | -2.229 | 5.66E-49 | 0.661202 | -2.4804 | 1.63E-74  | 0.719101 | -2.474 | 3.73E-57 | 0.72619  | -2.639 | 3.15E-20 | 0.7  |
| C11orf53  | 341032 | NA     | NA       | NA       | -2.1558 | 6.93E-35  | 0.719101 | NA     | NA       | NA       | -2.369 | 3.06E-09 | 0.75 |
| WISP3     | 8838   | -2.318 | 3.81E-16 | 0.677596 | -2.6163 | 6.69E-24  | 0.719101 | -2.515 | 1.45E-20 | 0.738095 | -2.002 | 0.000126 | 0.65 |
| LDB2      | 9079   | -2.192 | 2.71E-68 | 0.655738 | -2.4026 | 9.19E-104 | 0.717496 | -2.111 | 3.23E-62 | 0.59127  | -2.35  | 3.66E-26 | 0.8  |
| PEAR1     | 375033 | -2.267 | 5.95E-57 | 0.661202 | -2.4627 | 1.07E-82  | 0.717496 | -2.172 | 4.85E-54 | 0.626984 | -2.424 | 3.46E-25 | 0.7  |
| CNR1      | 1268   | -2.3   | 7.06E-27 | 0.639344 | -2.7186 | 4.29E-33  | 0.717496 | -2.613 | 1.02E-28 | 0.698413 | -2.807 | 1.57E-11 | 0.75 |
| SYT8      | 90019  | -2.041 | 1.07E-08 | 0.68306  | -2.4315 | 3.72E-15  | 0.717496 | -2.537 | 1.41E-12 | 0.730159 | -2.947 | 0.000149 | 0.75 |
| GNG11     | 2791   | -2.082 | 1.22E-56 | 0.677596 | -2.2683 | 7.31E-97  | 0.715891 | -2.013 | 1.43E-59 | 0.607143 | -2.083 | 1.70E-18 | 0.7  |
| PIP       | 5304   | NA     | NA       | NA       | -2.5829 | 6.19E-08  | 0.715891 | -2.458 | 6.77E-07 | 0.761905 | NA     | NA       | NA   |
| HYAL1     | 3373   | -2.021 | 1.74E-43 | 0.595628 | -2.287  | 4.64E-68  | 0.714286 | NA     | NA       | NA       | NA     | NA       | NA   |
| AQP5      | 362    | NA     | NA       | NA       | -2.3267 | 1.76E-10  | 0.714286 | -2.907 | 9.35E-15 | 0.777778 | -2.814 | 0.000141 | 0.8  |
| LRRC70    | 1E+08  | -2.053 | 1.00E-52 | 0.639344 | -2.3539 | 9.10E-82  | 0.712681 | -2.081 | 2.64E-49 | 0.615079 | -2.561 | 1.51E-22 | 0.8  |
| THSD7B    | 80731  | -2.546 | 3.82E-35 | 0.693989 | -2.9372 | 1.16E-47  | 0.712681 | -2.606 | 1.67E-32 | 0.638889 | -3.573 | 4.29E-24 | 0.85 |
| GAS2      | 2620   | NA     | NA       | NA       | -2.1543 | 1.42E-43  | 0.712681 | -2.282 | 2.32E-42 | 0.738095 | -2.393 | 7.52E-12 | 0.6  |
| C9orf125  | 84302  | -2.288 | 4.71E-60 | 0.655738 | -2.3926 | 1.96E-76  | 0.711075 | -2.267 | 6.78E-63 | 0.65873  | -2.445 | 4.40E-28 | 0.9  |

|             |        |        |          |          |         |          |          |        |          |          |        |          |      |
|-------------|--------|--------|----------|----------|---------|----------|----------|--------|----------|----------|--------|----------|------|
| TFPI        | 7035   | -2.309 | 2.02E-52 | 0.68306  | -2.3915 | 3.40E-70 | 0.711075 | -2.16  | 1.34E-47 | 0.630952 | NA     | NA       | NA   |
| BMP6        | 654    | -2.116 | 1.98E-41 | 0.650273 | -2.3488 | 5.75E-58 | 0.711075 | -2.212 | 1.69E-44 | 0.65873  | -2.568 | 3.67E-18 | 0.8  |
| C8orf79     | 57604  | -2.308 | 5.14E-33 | 0.590164 | -2.9519 | 3.32E-47 | 0.711075 | -2.774 | 1.98E-34 | 0.646825 | -3.523 | 4.49E-20 | 0.75 |
| NGFR        | 4804   | -2.496 | 5.19E-29 | 0.63388  | -2.9866 | 1.37E-42 | 0.711075 | -2.647 | 2.72E-28 | 0.654762 | -3.339 | 6.08E-16 | 0.8  |
| ODZ2        | 57451  | -2.401 | 6.11E-19 | 0.655738 | -2.7471 | 5.48E-30 | 0.711075 | -2.514 | 2.62E-22 | 0.72619  | -3.079 | 7.07E-08 | 0.85 |
| ADAMTS8     | 11095  | NA     | NA       | NA       | -2.1218 | 7.94E-24 | 0.70947  | NA     | NA       | NA       | -3.155 | 3.24E-11 | 0.85 |
| PALM2-AKAP1 | 445815 | -2.047 | 5.14E-55 | 0.644809 | -2.1713 | 4.78E-96 | 0.707865 | -2.154 | 1.90E-65 | 0.690476 | -2.3   | 3.94E-19 | 0.65 |
| RASSF9      | 9182   | -2.354 | 5.63E-49 | 0.63388  | -2.6972 | 5.94E-63 | 0.707865 | -2.643 | 1.52E-56 | 0.75     | -3.35  | 9.52E-32 | 0.85 |
| KCNIP1      | 30820  | NA     | NA       | NA       | -2.1467 | 4.58E-39 | 0.707865 | -2.103 | 2.99E-30 | 0.650794 | -2.674 | 9.87E-13 | 0.8  |
| C16orf89    | 146556 | -2.442 | 1.67E-17 | 0.606557 | -3.4513 | 3.88E-32 | 0.707865 | -2.64  | 3.31E-20 | 0.595238 | -3.978 | 6.60E-25 | 0.8  |
| NTF3        | 4908   | NA     | NA       | NA       | -2.3332 | 4.66E-31 | 0.70626  | -2.483 | 2.99E-33 | 0.72619  | -2.296 | 1.54E-10 | 0.75 |
| AGTR1       | 185    | NA     | NA       | NA       | -2.4664 | 1.43E-17 | 0.70626  | -2.265 | 9.28E-18 | 0.678571 | -2.166 | 8.08E-07 | 0.55 |
| CCDC36      | 339834 | -2.206 | 4.73E-39 | 0.693989 | -2.1997 | 3.16E-62 | 0.704655 | NA     | NA       | NA       | -2.049 | 9.49E-12 | 0.8  |
| LOC285419   | 285419 | NA     | NA       | NA       | -2.0424 | 8.23E-49 | 0.70305  | NA     | NA       | NA       | -2.172 | 2.49E-17 | 0.7  |
| MAPK10      | 5602   | -2.237 | 1.70E-26 | 0.655738 | -2.4228 | 3.55E-35 | 0.70305  | -2.431 | 9.11E-34 | 0.734127 | NA     | NA       | NA   |
| BANK1       | 55024  | NA     | NA       | NA       | -2.1287 | 3.50E-22 | 0.70305  | -2.134 | 1.41E-21 | 0.710317 | -2.577 | 3.48E-08 | 0.85 |
| ATP13A4     | 84239  | NA     | NA       | NA       | -2.1748 | 3.70E-14 | 0.70305  | -2.213 | 3.27E-11 | 0.710317 | -2.367 | 0.001022 | 0.6  |
| KCNAB1      | 7881   | -2.014 | 3.38E-50 | 0.639344 | -2.0984 | 2.09E-68 | 0.701445 | -2.128 | 2.22E-58 | 0.666667 | -2.478 | 1.23E-22 | 0.9  |
| ALDH2       | 217    | NA     | NA       | NA       | -2.046  | 1.09E-48 | 0.701445 | NA     | NA       | NA       | -2.071 | 6.29E-09 | 0.8  |
| PRSS12      | 8492   | -2.758 | 7.20E-28 | 0.688525 | -2.8589 | 3.16E-31 | 0.701445 | -3.159 | 1.57E-44 | 0.761905 | -3.064 | 1.49E-14 | 0.75 |
| C6orf142    | 90523  | NA     | NA       | NA       | NA      | NA       | NA       | -2.025 | 1.94E-28 | 0.984127 | -2.178 | 2.10E-07 | 0.95 |
| GDA         | 9615   | NA     | NA       | NA       | NA      | NA       | NA       | -2.01  | 9.98E-26 | 0.960317 | -2.122 | 4.08E-05 | 1    |
| KRT79       | 338785 | NA     | NA       | NA       | NA      | NA       | NA       | -2.095 | 7.46E-18 | 0.876984 | -2.424 | 3.21E-05 | 0.9  |
| MATN4       | 8785   | NA     | NA       | NA       | NA      | NA       | NA       | -2.119 | 3.88E-26 | 0.825397 | NA     | NA       | NA   |
| UTS2D       | 257313 | NA     | NA       | NA       | NA      | NA       | NA       | -2.032 | 5.98E-43 | 0.813492 | -2.197 | 1.11E-10 | 0.95 |
| ABCA13      | 154664 | NA     | NA       | NA       | NA      | NA       | NA       | -2.177 | 1.97E-14 | 0.809524 | -2.206 | 0.000355 | 0.8  |
| CXCL6       | 6372   | NA     | NA       | NA       | NA      | NA       | NA       | -2.139 | 5.47E-21 | 0.777778 | -2.254 | 1.41E-06 | 0.75 |
| SOX6        | 55553  | -2.017 | 2.55E-20 | 0.68306  | -2.18   | 1.88E-25 | 0.669342 | -2.637 | 2.87E-36 | 0.765873 | -2.968 | 1.07E-22 | 0.9  |
| C6orf15     | 29113  | NA     | NA       | NA       | NA      | NA       | NA       | -2.043 | 2.20E-15 | 0.765873 | -2.11  | 0.000185 | 0.65 |
| XDH         | 7498   | NA     | NA       | NA       | NA      | NA       | NA       | -2.117 | 1.34E-14 | 0.765873 | NA     | NA       | NA   |
| DAPL1       | 92196  | NA     | NA       | NA       | NA      | NA       | NA       | -2.297 | 1.27E-18 | 0.757937 | -3.219 | 1.22E-08 | 0.85 |
| TMEM71      | 137835 | NA     | NA       | NA       | -2.2472 | 8.47E-37 | 0.680578 | -2.297 | 2.79E-40 | 0.753968 | -2.966 | 1.53E-18 | 0.85 |
| ANXA8L2     | 244    | -2.206 | 1.30E-11 | 0.677596 | -2.5123 | 5.00E-16 | 0.688604 | -2.669 | 5.68E-17 | 0.746032 | -3.634 | 6.04E-08 | 0.8  |
| KCTD14      | 65987  | -2.245 | 1.68E-24 | 0.693989 | -2.5266 | 1.53E-36 | 0.698234 | -2.587 | 2.32E-33 | 0.738095 | -2.785 | 3.05E-11 | 0.7  |



|           |        |        |          |          |         |          |          |        |          |          |        |          |      |
|-----------|--------|--------|----------|----------|---------|----------|----------|--------|----------|----------|--------|----------|------|
| AMY1A     | 276    | NA     | NA       | NA       | NA      | NA       | NA       | -2.118 | 4.37E-19 | 0.734127 | NA     | NA       | NA   |
| SERPINB5  | 5268   | -2.063 | 1.09E-08 | 0.672131 | -2.2019 | 2.43E-11 | 0.65008  | -2.8   | 1.81E-14 | 0.734127 | -3.254 | 0.000205 | 0.7  |
| PKDCC     | 91461  | NA     | NA       | NA       | NA      | NA       | NA       | -2.116 | 1.48E-36 | 0.730159 | -2.169 | 1.40E-08 | 0.8  |
| DSG3      | 1830   | -2.421 | 1.03E-09 | 0.688525 | -2.7345 | 8.24E-13 | 0.690209 | -2.976 | 5.43E-14 | 0.730159 | -4.064 | 4.24E-06 | 0.75 |
| RIC3      | 79608  | -2.531 | 1.95E-24 | 0.562842 | -3.1269 | 1.92E-37 | 0.675762 | -3.177 | 9.15E-37 | 0.72619  | -3.671 | 1.14E-16 | 0.6  |
| COL4A3    | 1285   | NA     | NA       | NA       | -2.0831 | 8.26E-24 | 0.698234 | -2.159 | 2.96E-21 | 0.72619  | -2.487 | 5.85E-07 | 0.75 |
| MAML2     | 84441  | -2.49  | 1.76E-44 | 0.68306  | -2.4423 | 7.67E-59 | 0.677368 | -2.539 | 1.97E-52 | 0.722222 | -2.998 | 1.97E-23 | 0.85 |
| KLK11     | 11012  | -2.471 | 1.92E-09 | 0.688525 | -2.7003 | 3.55E-12 | 0.683788 | -3.119 | 3.50E-13 | 0.722222 | -3.487 | 8.52E-06 | 0.65 |
| STAC      | 6769   | -2.269 | 3.50E-28 | 0.644809 | -2.2384 | 7.51E-27 | 0.638844 | -2.621 | 1.88E-38 | 0.718254 | -2.913 | 4.28E-19 | 0.75 |
| SLC26A4   | 5172   | -2.08  | 1.59E-33 | 0.677596 | -2.03   | 3.79E-32 | 0.634029 | -2.129 | 5.00E-31 | 0.718254 | -2.039 | 2.58E-12 | 0.65 |
| SOX8      | 30812  | NA     | NA       | NA       | NA      | NA       | NA       | -2.167 | 1.90E-22 | 0.718254 | -2.242 | 1.12E-07 | 0.75 |
| DSC3      | 1825   | -2.348 | 1.11E-11 | 0.644809 | -2.7391 | 1.78E-16 | 0.659711 | -2.852 | 5.12E-17 | 0.718254 | -4.181 | 9.29E-08 | 0.7  |
| KIAA1045  | 23349  | -2.116 | 4.01E-26 | 0.639344 | -2.3491 | 1.97E-34 | 0.683788 | -2.532 | 5.98E-39 | 0.714286 | -3.072 | 4.48E-23 | 0.85 |
| GDF5      | 8200   | -2.081 | 6.36E-22 | 0.655738 | -2.2866 | 4.92E-23 | 0.667737 | -2.641 | 1.93E-34 | 0.714286 | -2.239 | 8.55E-11 | 0.6  |
| PTH2R     | 5746   | -2.15  | 2.84E-25 | 0.693989 | -2.1494 | 1.19E-23 | 0.661316 | -2.2   | 6.66E-28 | 0.714286 | -2.081 | 1.12E-07 | 0.7  |
| STX19     | 415117 | NA     | NA       | NA       | NA      | NA       | NA       | -2.09  | 1.91E-22 | 0.714286 | -2.135 | 3.93E-05 | 0.6  |
| GAS2L2    | 246176 | -2.38  | 1.20E-26 | 0.677596 | -2.5612 | 4.67E-36 | 0.695024 | -2.553 | 8.00E-32 | 0.710317 | -2.367 | 1.84E-10 | 0.65 |
| CACHD1    | 57685  | -2.578 | 6.16E-62 | 0.699454 | -2.6282 | 1.45E-78 | 0.696629 | -2.546 | 1.19E-65 | 0.706349 | -2.896 | 1.41E-28 | 0.65 |
| KLK10     | 5655   | -2.333 | 8.88E-11 | 0.699454 | -2.425  | 4.35E-12 | 0.651685 | -2.775 | 2.54E-14 | 0.706349 | -3.736 | 2.79E-08 | 0.75 |
| KRT6B     | 3854   | NA     | NA       | NA       | NA      | NA       | NA       | -2.702 | 3.93E-11 | 0.706349 | -3.731 | 7.06E-05 | 0.75 |
| FRMD3     | 257019 | -2.197 | 6.84E-30 | 0.672131 | -2.3157 | 5.20E-34 | 0.664526 | -2.52  | 9.72E-39 | 0.702381 | -3.255 | 1.22E-20 | 0.85 |
| TGM5      | 9333   | NA     | NA       | NA       | NA      | NA       | NA       | -2.182 | 1.75E-18 | 0.702381 | -2.491 | 5.55E-06 | 0.7  |
| SLC5A1    | 6523   | NA     | NA       | NA       | -2.3598 | 6.82E-13 | 0.656501 | -2.61  | 1.52E-13 | 0.702381 | NA     | NA       | NA   |
| LDB3      | 11155  | NA     | NA       | NA       | NA      | NA       | NA       | NA     | NA       | NA       | -2.171 | 5.15E-09 | 1    |
| LOC415056 | 415056 | NA     | NA       | NA       | NA      | NA       | NA       | NA     | NA       | NA       | -2.005 | 4.49E-09 | 0.95 |
| GABRG1    | 2565   | NA     | NA       | NA       | NA      | NA       | NA       | NA     | NA       | NA       | -2.207 | 8.83E-09 | 0.95 |
| FOXE1     | 2304   | NA     | NA       | NA       | NA      | NA       | NA       | NA     | NA       | NA       | -2.129 | 1.88E-07 | 0.95 |
| PEBP4     | 157310 | NA     | NA       | NA       | NA      | NA       | NA       | NA     | NA       | NA       | -2.5   | 2.09E-07 | 0.95 |
| GPR112    | 139378 | NA     | NA       | NA       | NA      | NA       | NA       | NA     | NA       | NA       | -2.139 | 5.14E-07 | 0.95 |
| PEG3AS    | 1E+08  | NA     | NA       | NA       | NA      | NA       | NA       | NA     | NA       | NA       | -2.237 | 2.10E-06 | 0.95 |
| ABCB11    | 8647   | NA     | NA       | NA       | NA      | NA       | NA       | NA     | NA       | NA       | -2.065 | 9.25E-06 | 0.95 |
| PNLIPRP3  | 119548 | NA     | NA       | NA       | NA      | NA       | NA       | NA     | NA       | NA       | -2.006 | 0.00167  | 0.95 |
| F3        | 2152   | -2.046 | 1.44E-34 | 0.590164 | -2.4183 | 2.76E-52 | 0.632424 | -2.285 | 1.10E-40 | 0.650794 | -3.044 | 7.94E-29 | 0.9  |
| CAPN3     | 825    | NA     | NA       | NA       | NA      | NA       | NA       | NA     | NA       | NA       | -2.024 | 9.07E-14 | 0.9  |

|            |        |        |          |          |         |          |          |        |          |          |        |          |      |
|------------|--------|--------|----------|----------|---------|----------|----------|--------|----------|----------|--------|----------|------|
| ESR2       | 2100   | NA     | NA       | NA       | NA      | NA       | NA       | NA     | NA       | NA       | -2.18  | 1.95E-10 | 0.9  |
| RYR1       | 6261   | NA     | NA       | NA       | NA      | NA       | NA       | NA     | NA       | NA       | -2.374 | 1.03E-09 | 0.9  |
| GALR1      | 2587   | NA     | NA       | NA       | NA      | NA       | NA       | NA     | NA       | NA       | -2.041 | 3.42E-09 | 0.9  |
| PLN        | 5350   | NA     | NA       | NA       | NA      | NA       | NA       | NA     | NA       | NA       | -2.018 | 1.92E-07 | 0.9  |
| CYP24A1    | 1591   | NA     | NA       | NA       | NA      | NA       | NA       | NA     | NA       | NA       | -2.083 | 0.001673 | 0.9  |
| DUSP1      | 1843   | -2.122 | 3.77E-37 | 0.622951 | -2.3872 | 1.85E-56 | 0.683788 | -2.21  | 3.92E-40 | 0.619048 | -3.113 | 1.35E-23 | 0.85 |
| NTRK3      | 4916   | -2.367 | 6.56E-23 | 0.628415 | -3.0373 | 1.46E-32 | 0.693419 | -2.976 | 1.97E-29 | 0.674603 | -3.451 | 3.10E-21 | 0.85 |
| EDN1       | 1906   | NA     | NA       | NA       | -2.0346 | 9.18E-36 | 0.553772 | NA     | NA       | NA       | -2.684 | 1.74E-17 | 0.85 |
| ARC        | 23237  | -2.251 | 2.53E-17 | 0.666667 | -2.5585 | 8.00E-29 | 0.669342 | -2.094 | 2.15E-17 | 0.650794 | -3.372 | 3.47E-16 | 0.85 |
| ZSCAN23    | 222696 | NA     | NA       | NA       | -2.185  | 1.55E-27 | 0.59069  | -2.193 | 1.09E-25 | 0.619048 | -2.905 | 1.76E-14 | 0.85 |
| TPPA       | 7274   | NA     | NA       | NA       | -2.0563 | 2.24E-26 | 0.664526 | -2.049 | 3.20E-21 | 0.646825 | -2.826 | 5.40E-13 | 0.85 |
| PTGER3     | 5733   | NA     | NA       | NA       | -2.2122 | 9.47E-24 | 0.573034 | NA     | NA       | NA       | -2.609 | 2.93E-12 | 0.85 |
| CDH22      | 64405  | NA     | NA       | NA       | -2.0095 | 1.76E-23 | 0.688604 | NA     | NA       | NA       | -2.749 | 6.00E-12 | 0.85 |
| FRMPD4     | 9758   | NA     | NA       | NA       | NA      | NA       | NA       | NA     | NA       | NA       | -2.266 | 3.43E-11 | 0.85 |
| AGXT       | 189    | NA     | NA       | NA       | NA      | NA       | NA       | NA     | NA       | NA       | -2.013 | 3.97E-07 | 0.85 |
| BPI        | 671    | NA     | NA       | NA       | NA      | NA       | NA       | NA     | NA       | NA       | -2.134 | 1.71E-06 | 0.85 |
| DMBT1      | 1755   | NA     | NA       | NA       | NA      | NA       | NA       | NA     | NA       | NA       | -2.255 | 0.000141 | 0.85 |
| EREG       | 2069   | NA     | NA       | NA       | NA      | NA       | NA       | NA     | NA       | NA       | -2.325 | 0.000731 | 0.85 |
| PROS1      | 5627   | -2.209 | 8.68E-57 | 0.562842 | -2.4208 | 1.90E-84 | 0.664526 | -2.23  | 1.29E-62 | 0.59127  | -2.624 | 1.73E-33 | 0.8  |
| PARK2      | 5071   | -2.09  | 4.78E-60 | 0.595628 | -2.2907 | 1.29E-63 | 0.613162 | -2.247 | 5.98E-56 | 0.630952 | -2.825 | 2.14E-31 | 0.8  |
| EMCN       | 51705  | NA     | NA       | NA       | -2.3432 | 7.60E-76 | 0.664526 | -2.031 | 1.52E-48 | 0.551587 | -2.431 | 2.68E-27 | 0.8  |
| PLSCR4     | 57088  | -2.085 | 1.09E-52 | 0.568306 | -2.4284 | 3.46E-87 | 0.678973 | -2.292 | 2.54E-59 | 0.642857 | -2.542 | 3.48E-27 | 0.8  |
| SPRY1      | 10252  | NA     | NA       | NA       | -2.206  | 3.17E-71 | 0.609952 | NA     | NA       | NA       | -2.26  | 4.53E-27 | 0.8  |
| ST6GALNAC1 | 55808  | -2.38  | 5.25E-30 | 0.63388  | -2.6159 | 8.08E-32 | 0.691814 | -2.311 | 1.76E-25 | 0.626984 | -3.435 | 1.58E-26 | 0.8  |
| S1PR1      | 1901   | -2.015 | 6.26E-49 | 0.584699 | -2.2982 | 3.03E-77 | 0.698234 | -2.032 | 3.15E-45 | 0.619048 | -2.448 | 9.33E-22 | 0.8  |
| LOC401093  | 401093 | NA     | NA       | NA       | NA      | NA       | NA       | -2.024 | 8.18E-61 | 0.634921 | -2.346 | 2.01E-21 | 0.8  |
| SELP       | 6403   | -2.13  | 1.69E-22 | 0.530055 | -3.0906 | 1.30E-35 | 0.670947 | -2.505 | 1.09E-24 | 0.56746  | -3.278 | 8.67E-21 | 0.8  |
| GPR44      | 11251  | -2.003 | 4.18E-36 | 0.63388  | -2.1455 | 2.40E-49 | 0.670947 | -2.035 | 7.38E-37 | 0.587302 | -2.361 | 1.33E-20 | 0.8  |
| ADHFE1     | 137872 | -2.006 | 1.31E-41 | 0.595628 | -2.3801 | 1.04E-56 | 0.677368 | -2.313 | 6.94E-44 | 0.65873  | -2.703 | 4.88E-20 | 0.8  |
| PTPRB      | 5787   | NA     | NA       | NA       | -2.1361 | 1.81E-62 | 0.619583 | NA     | NA       | NA       | -2.399 | 8.48E-19 | 0.8  |
| TEK        | 7010   | NA     | NA       | NA       | -2.1257 | 7.65E-58 | 0.605136 | NA     | NA       | NA       | -2.269 | 3.31E-17 | 0.8  |
| CXCL1      | 2919   | NA     | NA       | NA       | -2.1116 | 1.02E-16 | 0.629213 | -2.644 | 7.53E-27 | 0.694444 | -3.08  | 2.74E-15 | 0.8  |
| PRUNE2     | 158471 | NA     | NA       | NA       | -2.0131 | 1.82E-37 | 0.642055 | -2.019 | 9.72E-39 | 0.626984 | -2.559 | 4.41E-15 | 0.8  |
| DIRAS3     | 9077   | NA     | NA       | NA       | NA      | NA       | NA       | NA     | NA       | NA       | -2.881 | 1.43E-13 | 0.8  |

|             |        |        |          |          |         |          |          |        |          |          |        |          |      |
|-------------|--------|--------|----------|----------|---------|----------|----------|--------|----------|----------|--------|----------|------|
| PKIA        | 5569   | NA     | NA       | NA       | NA      | NA       | NA       | NA     | NA       | NA       | -2.113 | 1.43E-13 | 0.8  |
| CYR61       | 3491   | NA     | NA       | NA       | NA      | NA       | NA       | NA     | NA       | NA       | -2.399 | 4.16E-13 | 0.8  |
| PZP         | 5858   | NA     | NA       | NA       | NA      | NA       | NA       | NA     | NA       | NA       | -2.133 | 2.58E-12 | 0.8  |
| PAR5        | 8123   | NA     | NA       | NA       | -2.2472 | 5.38E-29 | 0.619583 | -2.093 | 4.10E-23 | 0.615079 | -3.226 | 5.83E-12 | 0.8  |
| CLEC10A     | 10462  | NA     | NA       | NA       | -2.2668 | 1.12E-21 | 0.592295 | -2.012 | 1.68E-17 | 0.563492 | -2.587 | 7.27E-12 | 0.8  |
| SLC25A18    | 83733  | NA     | NA       | NA       | NA      | NA       | NA       | NA     | NA       | NA       | -2.234 | 2.18E-11 | 0.8  |
| ABCC6P1     | 653190 | -2.071 | 1.05E-22 | 0.655738 | -2.2062 | 3.06E-32 | 0.651685 | -2.181 | 3.64E-26 | 0.678571 | -2.394 | 1.00E-10 | 0.8  |
| LOC10012678 | 1E+08  | NA     | NA       | NA       | -2.0654 | 1.24E-31 | 0.662921 | NA     | NA       | NA       | -2.395 | 2.97E-10 | 0.8  |
| APOLD1      | 81575  | NA     | NA       | NA       | NA      | NA       | NA       | NA     | NA       | NA       | -2.308 | 5.58E-10 | 0.8  |
| STX11       | 8676   | NA     | NA       | NA       | NA      | NA       | NA       | NA     | NA       | NA       | -2.176 | 1.11E-09 | 0.8  |
| ERVFRDE1    | 405754 | NA     | NA       | NA       | NA      | NA       | NA       | NA     | NA       | NA       | -2.323 | 1.28E-09 | 0.8  |
| TP53TG3B    | 729355 | NA     | NA       | NA       | NA      | NA       | NA       | NA     | NA       | NA       | -2.204 | 3.35E-08 | 0.8  |
| KLK13       | 26085  | NA     | NA       | NA       | NA      | NA       | NA       | NA     | NA       | NA       | -2.384 | 1.02E-07 | 0.8  |
| CHST4       | 10164  | NA     | NA       | NA       | NA      | NA       | NA       | NA     | NA       | NA       | -2.198 | 1.13E-07 | 0.8  |
| ANXA8       | 653145 | NA     | NA       | NA       | -2.2898 | 1.73E-13 | 0.621188 | -2.467 | 1.33E-14 | 0.68254  | -3.431 | 2.43E-07 | 0.8  |
| MPPED1      | 758    | NA     | NA       | NA       | NA      | NA       | NA       | NA     | NA       | NA       | -2.264 | 4.96E-07 | 0.8  |
| IL1RAPL2    | 26280  | NA     | NA       | NA       | NA      | NA       | NA       | NA     | NA       | NA       | -2.454 | 5.50E-07 | 0.8  |
| OR7A5       | 26659  | NA     | NA       | NA       | NA      | NA       | NA       | NA     | NA       | NA       | -2.013 | 1.48E-06 | 0.8  |
| NPR3        | 4883   | NA     | NA       | NA       | NA      | NA       | NA       | NA     | NA       | NA       | -2.636 | 5.51E-06 | 0.8  |
| MUC16       | 94025  | -2.312 | 6.97E-10 | 0.699454 | NA      | NA       | NA       | -2.17  | 1.99E-09 | 0.674603 | -2.844 | 1.83E-05 | 0.8  |
| LGALS7      | 3963   | NA     | NA       | NA       | NA      | NA       | NA       | NA     | NA       | NA       | -2.113 | 0.000195 | 0.8  |
| JAM2        | 58494  | -2.186 | 3.05E-56 | 0.579235 | -2.4234 | 8.16E-79 | 0.656501 | NA     | NA       | NA       | -2.527 | 3.59E-33 | 0.75 |
| PELI2       | 57161  | -2.023 | 4.82E-48 | 0.480874 | -2.25   | 1.82E-64 | 0.589085 | -2.012 | 7.50E-50 | 0.5      | -2.649 | 6.05E-30 | 0.75 |
| psiTPTE22   | 387590 | NA     | NA       | NA       | -2.297  | 5.55E-28 | 0.585875 | -2.113 | 3.73E-21 | 0.559524 | -3.025 | 1.46E-29 | 0.75 |
| LHFP        | 10186  | -2.079 | 5.73E-62 | 0.562842 | -2.3441 | 3.88E-95 | 0.675762 | -2.064 | 1.05E-56 | 0.559524 | -2.248 | 1.12E-25 | 0.75 |
| PRIMA1      | 145270 | -2.497 | 3.15E-36 | 0.650273 | -2.5424 | 7.18E-41 | 0.64687  | -2.603 | 5.39E-39 | 0.65873  | -3.514 | 1.06E-24 | 0.75 |
| EFEMP1      | 2202   | -2.361 | 1.24E-39 | 0.617486 | -2.6191 | 1.24E-49 | 0.672552 | -2.38  | 1.61E-51 | 0.694444 | -2.904 | 1.96E-24 | 0.75 |
| PRDM16      | 63976  | NA     | NA       | NA       | -2.2211 | 1.53E-47 | 0.642055 | NA     | NA       | NA       | -2.745 | 1.27E-22 | 0.75 |
| NOVA1       | 4857   | -2.164 | 2.38E-18 | 0.595628 | -2.8339 | 9.54E-27 | 0.685393 | -2.305 | 1.62E-22 | 0.611111 | -3.217 | 1.46E-22 | 0.75 |
| FLRT2       | 23768  | -2.119 | 8.61E-37 | 0.519126 | -2.3893 | 6.34E-52 | 0.622793 | -2.127 | 8.87E-42 | 0.551587 | -2.551 | 2.12E-22 | 0.75 |
| IRS2        | 8660   | NA     | NA       | NA       | NA      | NA       | NA       | NA     | NA       | NA       | -2.311 | 2.36E-22 | 0.75 |
| MYCT1       | 80177  | NA     | NA       | NA       | -2.1722 | 1.57E-82 | 0.654896 | NA     | NA       | NA       | -2.199 | 5.87E-21 | 0.75 |
| LEPREL1     | 55214  | NA     | NA       | NA       | -2.1144 | 1.72E-49 | 0.606742 | -2.116 | 2.34E-46 | 0.571429 | -2.36  | 6.67E-21 | 0.75 |
| PVRL3       | 25945  | -2.221 | 9.81E-41 | 0.601093 | -2.3517 | 3.52E-52 | 0.634029 | -2.237 | 1.54E-41 | 0.607143 | -2.735 | 2.49E-20 | 0.75 |

|           |        |        |          |          |         |          |          |        |          |          |        |          |      |
|-----------|--------|--------|----------|----------|---------|----------|----------|--------|----------|----------|--------|----------|------|
| C10orf128 | 170371 | -2.311 | 9.79E-37 | 0.655738 | -2.5214 | 8.99E-57 | 0.670947 | -2.311 | 7.86E-38 | 0.611111 | -2.61  | 8.69E-20 | 0.75 |
| FAT4      | 79633  | -2.11  | 2.61E-40 | 0.568306 | -2.3742 | 3.01E-52 | 0.616372 | -2.144 | 1.95E-39 | 0.575397 | -2.587 | 8.91E-20 | 0.75 |
| FGF1      | 2246   | -2.331 | 2.96E-48 | 0.622951 | -2.6084 | 3.65E-74 | 0.698234 | -2.349 | 8.48E-55 | 0.654762 | -2.579 | 1.59E-19 | 0.75 |
| LAMA3     | 3909   | -2.39  | 4.31E-27 | 0.612022 | -2.7278 | 9.54E-39 | 0.670947 | -2.692 | 5.02E-35 | 0.678571 | -3.695 | 8.47E-19 | 0.75 |
| CXCL14    | 9547   | NA     | NA       | NA       | -2.2583 | 1.07E-17 | 0.544141 | NA     | NA       | NA       | -3.107 | 1.09E-18 | 0.75 |
| L3MBTL4   | 91133  | -2.037 | 3.49E-29 | 0.601093 | -2.1246 | 5.29E-32 | 0.600321 | -2.379 | 1.86E-40 | 0.650794 | -2.697 | 9.02E-18 | 0.75 |
| COL14A1   | 7373   | -2.125 | 4.57E-26 | 0.535519 | -2.5522 | 8.79E-40 | 0.634029 | -2.014 | 2.23E-26 | 0.543651 | -2.871 | 3.28E-17 | 0.75 |
| RCAN1     | 1827   | -2.058 | 1.20E-38 | 0.672131 | -2.1004 | 1.88E-54 | 0.648475 | -2.234 | 1.11E-45 | 0.670635 | -2.521 | 6.80E-17 | 0.75 |
| GPR116    | 221395 | NA     | NA       | NA       | NA      | NA       | NA       | NA     | NA       | NA       | -2.105 | 6.96E-17 | 0.75 |
| PTGIS     | 5740   | -2.011 | 2.58E-25 | 0.639344 | -2.2746 | 2.49E-43 | 0.682183 | -2.049 | 1.73E-34 | 0.662698 | -3.197 | 9.77E-17 | 0.75 |
| CNGA1     | 1259   | -2.312 | 2.86E-24 | 0.650273 | -2.489  | 2.26E-32 | 0.670947 | -2.762 | 6.81E-35 | 0.68254  | -3.132 | 1.32E-16 | 0.75 |
| PPP1R16B  | 26051  | NA     | NA       | NA       | -2.2738 | 1.37E-49 | 0.666132 | -2.186 | 2.52E-37 | 0.619048 | -2.519 | 4.14E-16 | 0.75 |
| CLEC4F    | 165530 | NA     | NA       | NA       | -2.0672 | 6.24E-27 | 0.598716 | -2.106 | 2.12E-25 | 0.571429 | -2.872 | 5.52E-16 | 0.75 |
| GRIN2A    | 2903   | NA     | NA       | NA       | -2.0032 | 3.82E-24 | 0.621188 | NA     | NA       | NA       | -2.843 | 6.57E-16 | 0.75 |
| DLC1      | 10395  | NA     | NA       | NA       | NA      | NA       | NA       | NA     | NA       | NA       | -2.141 | 1.04E-15 | 0.75 |
| ALDH1A3   | 220    | -2.012 | 4.53E-26 | 0.601093 | -2.3442 | 2.77E-44 | 0.654896 | -2.359 | 3.78E-37 | 0.666667 | -2.607 | 2.53E-15 | 0.75 |
| HMGCLL1   | 54511  | -2.216 | 1.99E-20 | 0.584699 | -2.3678 | 3.46E-22 | 0.616372 | -2.523 | 1.74E-26 | 0.670635 | -3.158 | 2.70E-15 | 0.75 |
| TMEM22    | 80723  | -2.011 | 1.23E-49 | 0.68306  | -2.0974 | 7.88E-78 | 0.690209 | NA     | NA       | NA       | -2.211 | 2.71E-15 | 0.75 |
| PGM5P2    | 595135 | NA     | NA       | NA       | NA      | NA       | NA       | NA     | NA       | NA       | -2.1   | 4.20E-15 | 0.75 |
| SLC7A4    | 6545   | NA     | NA       | NA       | -2.194  | 8.73E-12 | 0.577849 | -2.24  | 7.00E-12 | 0.583333 | -3.448 | 6.50E-15 | 0.75 |
| PPP2R2B   | 5521   | NA     | NA       | NA       | -2.0399 | 1.48E-37 | 0.600321 | -2.135 | 2.46E-37 | 0.630952 | -2.568 | 6.86E-15 | 0.75 |
| ZNF366    | 167465 | NA     | NA       | NA       | -2.1815 | 9.61E-43 | 0.59069  | NA     | NA       | NA       | -2.377 | 1.17E-14 | 0.75 |
| SLIT3     | 6586   | -2.216 | 1.35E-41 | 0.628415 | -2.4598 | 1.03E-58 | 0.683788 | -2.098 | 1.90E-43 | 0.623016 | -2.245 | 5.60E-14 | 0.75 |
| KLRF1     | 51348  | NA     | NA       | NA       | NA      | NA       | NA       | NA     | NA       | NA       | -2.26  | 3.33E-13 | 0.75 |
| LAMB3     | 3914   | -2.162 | 2.23E-27 | 0.63388  | -2.3281 | 1.28E-33 | 0.627608 | -2.538 | 1.58E-32 | 0.678571 | -2.737 | 4.49E-13 | 0.75 |
| ABO       | 28     | NA     | NA       | NA       | NA      | NA       | NA       | NA     | NA       | NA       | -2.493 | 4.02E-12 | 0.75 |
| HYMAI     | 57061  | NA     | NA       | NA       | NA      | NA       | NA       | NA     | NA       | NA       | -2.076 | 4.88E-12 | 0.75 |
| AGPAT9    | 84803  | NA     | NA       | NA       | NA      | NA       | NA       | NA     | NA       | NA       | -2.09  | 6.12E-12 | 0.75 |
| THSD7A    | 221981 | NA     | NA       | NA       | NA      | NA       | NA       | NA     | NA       | NA       | -2.097 | 6.79E-12 | 0.75 |
| AFF2      | 2334   | NA     | NA       | NA       | NA      | NA       | NA       | NA     | NA       | NA       | -2.303 | 9.63E-12 | 0.75 |
| WFIKK2    | 124857 | NA     | NA       | NA       | NA      | NA       | NA       | NA     | NA       | NA       | -2.021 | 1.43E-11 | 0.75 |
| GNG2      | 54331  | NA     | NA       | NA       | NA      | NA       | NA       | NA     | NA       | NA       | -2.067 | 4.80E-11 | 0.75 |
| P2RY14    | 9934   | NA     | NA       | NA       | NA      | NA       | NA       | NA     | NA       | NA       | -2.054 | 1.15E-10 | 0.75 |
| SEMA3A    | 10371  | NA     | NA       | NA       | -2.0644 | 2.57E-41 | 0.608347 | NA     | NA       | NA       | -2.017 | 1.52E-10 | 0.75 |

|         |        |        |          |          |         |           |          |        |          |          |        |          |      |
|---------|--------|--------|----------|----------|---------|-----------|----------|--------|----------|----------|--------|----------|------|
| ENPP6   | 133121 | NA     | NA       | NA       | NA      | NA        | NA       | NA     | NA       | NA       | -2.243 | 1.61E-10 | 0.75 |
| PDZRN4  | 29951  | -2.042 | 1.77E-18 | 0.666667 | -2.1184 | 2.79E-21  | 0.675762 | -2.016 | 1.45E-17 | 0.666667 | -2.606 | 3.75E-10 | 0.75 |
| ANO4    | 121601 | NA     | NA       | NA       | NA      | NA        | NA       | NA     | NA       | NA       | -2.148 | 7.51E-10 | 0.75 |
| DCHS2   | 54798  | NA     | NA       | NA       | NA      | NA        | NA       | -2.222 | 1.10E-30 | 0.68254  | -2.387 | 1.72E-09 | 0.75 |
| CRHR1   | 1394   | NA     | NA       | NA       | -2.0563 | 1.65E-16  | 0.688604 | -2.405 | 2.83E-23 | 0.686508 | -2.64  | 7.20E-08 | 0.75 |
| ENPP3   | 5169   | NA     | NA       | NA       | NA      | NA        | NA       | NA     | NA       | NA       | -2.102 | 1.47E-07 | 0.75 |
| SLC35F3 | 148641 | NA     | NA       | NA       | -2.393  | 9.64E-21  | 0.678973 | -2.471 | 6.72E-19 | 0.686508 | -3.454 | 1.53E-07 | 0.75 |
| LEFTY2  | 7044   | NA     | NA       | NA       | -2.1644 | 2.58E-18  | 0.674157 | -2.005 | 6.81E-17 | 0.646825 | -2.26  | 6.08E-07 | 0.75 |
| MT1A    | 4489   | NA     | NA       | NA       | -2.0033 | 9.37E-17  | 0.627608 | NA     | NA       | NA       | -2.065 | 9.56E-07 | 0.75 |
| HCN1    | 348980 | NA     | NA       | NA       | NA      | NA        | NA       | NA     | NA       | NA       | -2.022 | 3.41E-06 | 0.75 |
| MUC4    | 4585   | NA     | NA       | NA       | NA      | NA        | NA       | NA     | NA       | NA       | -2.375 | 3.83E-06 | 0.75 |
| BCL11A  | 53335  | NA     | NA       | NA       | NA      | NA        | NA       | NA     | NA       | NA       | -2.564 | 3.09E-05 | 0.75 |
| FRMPD2  | 143162 | NA     | NA       | NA       | NA      | NA        | NA       | NA     | NA       | NA       | -2.036 | 0.000863 | 0.75 |
| PDZK1   | 5174   | NA     | NA       | NA       | NA      | NA        | NA       | NA     | NA       | NA       | -2.09  | 0.001675 | 0.75 |
| FOX1    | 2299   | NA     | NA       | NA       | NA      | NA        | NA       | NA     | NA       | NA       | -2.294 | 0.003693 | 0.75 |
| SPARCL1 | 8404   | NA     | NA       | NA       | -2.2343 | 1.56E-68  | 0.568218 | NA     | NA       | NA       | -2.502 | 1.70E-31 | 0.7  |
| PTPN21  | 11099  | NA     | NA       | NA       | NA      | NA        | NA       | NA     | NA       | NA       | -2.124 | 1.21E-29 | 0.7  |
| PCDHGB7 | 56099  | -2.166 | 2.67E-37 | 0.508197 | -2.5509 | 5.09E-51  | 0.59069  | -2.282 | 9.65E-40 | 0.52381  | -2.711 | 1.25E-28 | 0.7  |
| CYR1    | 116159 | -2.047 | 1.25E-62 | 0.535519 | -2.2442 | 8.19E-78  | 0.65008  | -2.226 | 3.62E-64 | 0.638889 | -2.292 | 1.12E-27 | 0.7  |
| NFIB    | 4781   | -2.386 | 3.15E-42 | 0.639344 | -2.3281 | 2.18E-49  | 0.58748  | -2.329 | 1.99E-53 | 0.603175 | -2.335 | 1.60E-27 | 0.7  |
| PPAP2B  | 8613   | -2.001 | 4.49E-65 | 0.535519 | -2.1118 | 1.22E-105 | 0.597111 | -2.032 | 3.34E-66 | 0.543651 | -2.168 | 1.78E-27 | 0.7  |
| FAM126A | 84668  | -2.203 | 1.61E-55 | 0.612022 | -2.31   | 6.10E-74  | 0.622793 | -2.285 | 2.22E-56 | 0.634921 | -2.671 | 1.32E-26 | 0.7  |
| PLAGL1  | 5325   | -2.231 | 1.32E-45 | 0.601093 | -2.2042 | 2.89E-59  | 0.5939   | -2.171 | 3.49E-47 | 0.595238 | -2.445 | 1.32E-25 | 0.7  |
| ZNF204P | 7754   | -2.102 | 3.30E-35 | 0.508197 | -2.322  | 5.13E-41  | 0.518459 | -2.334 | 3.25E-36 | 0.543651 | -3.159 | 4.80E-25 | 0.7  |
| RND3    | 390    | NA     | NA       | NA       | NA      | NA        | NA       | NA     | NA       | NA       | -2.55  | 4.38E-23 | 0.7  |
| ROBO3   | 64221  | -2.047 | 1.46E-42 | 0.568306 | -2.2762 | 3.23E-64  | 0.632424 | -2.073 | 1.30E-36 | 0.575397 | -2.262 | 8.33E-22 | 0.7  |
| BOC     | 91653  | -2.135 | 1.39E-44 | 0.595628 | -2.2383 | 2.81E-54  | 0.600321 | -2.143 | 4.84E-45 | 0.599206 | -2.265 | 1.93E-21 | 0.7  |
| RUNDC3B | 154661 | -2.003 | 4.33E-46 | 0.513661 | -2.2142 | 1.22E-58  | 0.5939   | NA     | NA       | NA       | -2.397 | 3.41E-21 | 0.7  |
| NEDD9   | 4739   | NA     | NA       | NA       | NA      | NA        | NA       | NA     | NA       | NA       | -2.235 | 5.45E-21 | 0.7  |
| WASF3   | 10810  | -2.349 | 2.27E-44 | 0.628415 | -2.5128 | 7.41E-67  | 0.674157 | -2.562 | 6.76E-50 | 0.674603 | -2.745 | 9.21E-21 | 0.7  |
| PDE7B   | 27115  | NA     | NA       | NA       | NA      | NA        | NA       | NA     | NA       | NA       | -2.108 | 1.92E-20 | 0.7  |
| TNNI3K  | 51086  | -2.043 | 1.23E-26 | 0.551913 | -2.0696 | 7.03E-29  | 0.552167 | -2.267 | 1.32E-34 | 0.587302 | -2.948 | 2.39E-20 | 0.7  |
| PCDHGB6 | 56100  | -2.099 | 1.15E-36 | 0.540984 | -2.1318 | 8.90E-41  | 0.568218 | -2.033 | 3.16E-35 | 0.543651 | -2.335 | 2.92E-20 | 0.7  |
| SORBS2  | 8470   | NA     | NA       | NA       | NA      | NA        | NA       | NA     | NA       | NA       | -2.48  | 4.58E-20 | 0.7  |

|            |        |        |          |          |         |          |          |        |          |          |        |          |     |
|------------|--------|--------|----------|----------|---------|----------|----------|--------|----------|----------|--------|----------|-----|
| SOCS2      | 8835   | NA     | NA       | NA       | -2.0943 | 6.58E-39 | 0.573034 | NA     | NA       | NA       | -2.308 | 4.75E-20 | 0.7 |
| TAL1       | 6886   | NA     | NA       | NA       | -2.2419 | 2.84E-75 | 0.662921 | NA     | NA       | NA       | -2.201 | 5.19E-20 | 0.7 |
| TM4SF18    | 116441 | NA     | NA       | NA       | -2.1486 | 3.13E-57 | 0.654896 | -2.274 | 8.65E-57 | 0.690476 | -2.258 | 5.27E-20 | 0.7 |
| MMRN2      | 79812  | NA     | NA       | NA       | -2.1105 | 3.47E-82 | 0.638844 | NA     | NA       | NA       | -2.015 | 1.90E-19 | 0.7 |
| NMT2       | 9397   | NA     | NA       | NA       | -2.0109 | 6.86E-79 | 0.624398 | -2.067 | 1.11E-66 | 0.630952 | -2.217 | 2.47E-19 | 0.7 |
| PRCD       | 768206 | -2.091 | 2.09E-51 | 0.666667 | -2.1429 | 9.13E-78 | 0.666132 | NA     | NA       | NA       | -2.051 | 3.02E-19 | 0.7 |
| EPHB6      | 2051   | -2.058 | 1.79E-27 | 0.551913 | NA      | NA       | NA       | -2.225 | 8.07E-33 | 0.603175 | -2.402 | 3.15E-19 | 0.7 |
| F8         | 2157   | NA     | NA       | NA       | NA      | NA       | NA       | NA     | NA       | NA       | -2.149 | 4.07E-19 | 0.7 |
| SOX7       | 83595  | NA     | NA       | NA       | -2.0413 | 1.62E-65 | 0.629213 | NA     | NA       | NA       | -2.236 | 5.11E-19 | 0.7 |
| TMEM88     | 92162  | NA     | NA       | NA       | -2.3217 | 3.20E-73 | 0.682183 | -2.012 | 1.47E-41 | 0.575397 | -2.064 | 5.21E-19 | 0.7 |
| CELF2      | 10659  | NA     | NA       | NA       | -2.1305 | 2.90E-61 | 0.629213 | -2.074 | 2.02E-50 | 0.623016 | -2.51  | 6.64E-19 | 0.7 |
| MRGPRF     | 116535 | -2.148 | 3.61E-38 | 0.584699 | -2.5001 | 1.24E-64 | 0.680578 | -2.148 | 8.63E-42 | 0.599206 | -2.359 | 8.07E-19 | 0.7 |
| NBLA00301  | 79804  | -2.287 | 2.35E-45 | 0.644809 | -2.3685 | 1.50E-61 | 0.642055 | -2.236 | 4.39E-42 | 0.611111 | -2.545 | 1.07E-18 | 0.7 |
| STEAP4     | 79689  | NA     | NA       | NA       | -2.2233 | 2.54E-22 | 0.5939   | -2.199 | 2.92E-28 | 0.583333 | -2.666 | 2.48E-18 | 0.7 |
| TACC1      | 6867   | -2.001 | 1.81E-46 | 0.551913 | -2.088  | 7.02E-59 | 0.600321 | NA     | NA       | NA       | -2.301 | 2.98E-18 | 0.7 |
| DAAM2      | 23500  | NA     | NA       | NA       | NA      | NA       | NA       | NA     | NA       | NA       | -2.246 | 4.10E-18 | 0.7 |
| BACH2      | 60468  | NA     | NA       | NA       | NA      | NA       | NA       | NA     | NA       | NA       | -2.509 | 8.85E-18 | 0.7 |
| ZNF488     | 118738 | NA     | NA       | NA       | NA      | NA       | NA       | NA     | NA       | NA       | -2.633 | 4.48E-17 | 0.7 |
| MAP7D3     | 79649  | -2.034 | 5.16E-43 | 0.617486 | -2.1096 | 3.31E-55 | 0.629213 | -2.092 | 6.70E-52 | 0.634921 | -2.204 | 1.03E-16 | 0.7 |
| ST6GALNAC3 | 256435 | NA     | NA       | NA       | -2.1243 | 4.80E-69 | 0.666132 | -2.071 | 5.18E-54 | 0.646825 | -2.13  | 1.23E-16 | 0.7 |
| RUNX1T1    | 862    | -2.301 | 4.09E-37 | 0.590164 | -2.6051 | 2.70E-49 | 0.656501 | -2.263 | 8.86E-38 | 0.615079 | -2.504 | 1.47E-16 | 0.7 |
| MRAP2      | 112609 | -2.015 | 1.09E-20 | 0.535519 | -2.1925 | 3.44E-27 | 0.561798 | -2.477 | 8.66E-29 | 0.619048 | -3.065 | 2.25E-16 | 0.7 |
| SCAND3     | 114821 | NA     | NA       | NA       | NA      | NA       | NA       | NA     | NA       | NA       | -3.451 | 2.61E-16 | 0.7 |
| PCDHGA3    | 56112  | -2.235 | 1.78E-42 | 0.661202 | -2.3869 | 1.01E-49 | 0.686998 | -2.121 | 6.54E-37 | 0.59127  | -2.283 | 3.06E-16 | 0.7 |
| SPTBN1     | 6711   | NA     | NA       | NA       | NA      | NA       | NA       | NA     | NA       | NA       | -2.005 | 4.22E-16 | 0.7 |
| LAMA2      | 3908   | -2.074 | 2.27E-27 | 0.551913 | -2.4355 | 3.05E-41 | 0.619583 | NA     | NA       | NA       | -2.597 | 5.25E-16 | 0.7 |
| CCDC158    | 339965 | NA     | NA       | NA       | -2.5258 | 3.13E-33 | 0.627608 | -2.599 | 1.02E-31 | 0.686508 | -2.988 | 5.71E-16 | 0.7 |
| TLN2       | 83660  | NA     | NA       | NA       | NA      | NA       | NA       | NA     | NA       | NA       | -2.02  | 3.79E-15 | 0.7 |
| GCNT4      | 51301  | NA     | NA       | NA       | -2.0789 | 5.04E-31 | 0.582665 | NA     | NA       | NA       | -2.373 | 4.77E-15 | 0.7 |
| ADAMTSL4   | 54507  | -2.065 | 5.48E-39 | 0.666667 | -2.1192 | 2.44E-52 | 0.667737 | -2.02  | 1.15E-43 | 0.634921 | -2.278 | 7.76E-15 | 0.7 |
| NCALD      | 83988  | -2.269 | 3.65E-45 | 0.693989 | -2.1431 | 2.60E-45 | 0.667737 | -2.19  | 5.71E-46 | 0.68254  | -2.158 | 8.40E-15 | 0.7 |
| SUGT1P1    | 441394 | NA     | NA       | NA       | NA      | NA       | NA       | NA     | NA       | NA       | -2.003 | 9.35E-15 | 0.7 |
| CYP4F12    | 66002  | NA     | NA       | NA       | -2.4011 | 9.06E-22 | 0.632424 | -2.464 | 5.78E-24 | 0.646825 | -3.03  | 1.17E-14 | 0.7 |
| CPAMD8     | 27151  | -2.065 | 2.08E-26 | 0.606557 | -2.131  | 2.41E-31 | 0.58748  | -2.101 | 3.05E-26 | 0.551587 | -2.41  | 1.97E-14 | 0.7 |

|             |        |        |          |          |         |          |          |        |          |          |        |          |     |
|-------------|--------|--------|----------|----------|---------|----------|----------|--------|----------|----------|--------|----------|-----|
| PCDH18      | 54510  | NA     | NA       | NA       | -2.1378 | 1.54E-58 | 0.635634 | NA     | NA       | NA       | -2.196 | 2.45E-14 | 0.7 |
| C6orf123    | 26238  | NA     | NA       | NA       | NA      | NA       | NA       | NA     | NA       | NA       | -2.036 | 4.49E-14 | 0.7 |
| MYH3        | 4621   | NA     | NA       | NA       | NA      | NA       | NA       | NA     | NA       | NA       | -2.133 | 1.62E-13 | 0.7 |
| ANO5        | 203859 | NA     | NA       | NA       | -2.0753 | 1.72E-16 | 0.64366  | -2.185 | 3.09E-18 | 0.674603 | -2.791 | 3.34E-13 | 0.7 |
| SYT15       | 83849  | NA     | NA       | NA       | -2.2416 | 1.01E-53 | 0.667737 | -2.064 | 1.18E-34 | 0.595238 | -2.269 | 3.39E-13 | 0.7 |
| VGLL3       | 389136 | NA     | NA       | NA       | -2.0983 | 2.57E-45 | 0.603531 | NA     | NA       | NA       | -2.403 | 3.60E-13 | 0.7 |
| DDIT4L      | 115265 | NA     | NA       | NA       | NA      | NA       | NA       | NA     | NA       | NA       | -2.286 | 2.07E-12 | 0.7 |
| ZNF727      | 442319 | -2.342 | 3.10E-24 | 0.612022 | -2.5301 | 3.06E-36 | 0.659711 | -2.446 | 9.06E-31 | 0.654762 | -2.54  | 3.37E-12 | 0.7 |
| C4orf31     | 79625  | -2.114 | 3.36E-23 | 0.57377  | -2.5865 | 4.65E-36 | 0.661316 | -2.268 | 8.12E-28 | 0.623016 | -2.145 | 8.29E-12 | 0.7 |
| CNNM1       | 26507  | -2.161 | 5.14E-20 | 0.63388  | -2.0467 | 5.45E-19 | 0.616372 | -2.162 | 1.68E-22 | 0.638889 | -2.553 | 1.34E-11 | 0.7 |
| FERMT1      | 55612  | -2.105 | 2.36E-16 | 0.601093 | -2.0679 | 6.16E-15 | 0.579454 | -2.409 | 1.96E-21 | 0.662698 | -3.106 | 4.93E-11 | 0.7 |
| PHYHIPL     | 84457  | NA     | NA       | NA       | -2.237  | 1.81E-35 | 0.675762 | -2.178 | 1.94E-26 | 0.678571 | -2.527 | 1.59E-10 | 0.7 |
| LOC10013354 | 1E+08  | NA     | NA       | NA       | -2.0566 | 5.27E-37 | 0.675762 | NA     | NA       | NA       | -2.131 | 1.97E-10 | 0.7 |
| CDKL2       | 8999   | -2.055 | 4.96E-17 | 0.622951 | -2.2384 | 4.43E-25 | 0.662921 | -2.146 | 1.59E-19 | 0.650794 | -2.66  | 5.29E-09 | 0.7 |
| ITIH3       | 3699   | NA     | NA       | NA       | NA      | NA       | NA       | NA     | NA       | NA       | -2.035 | 7.78E-09 | 0.7 |
| ANKK1       | 255239 | NA     | NA       | NA       | NA      | NA       | NA       | NA     | NA       | NA       | -2.247 | 4.40E-08 | 0.7 |
| HEPACAM2    | 253012 | NA     | NA       | NA       | -2.152  | 1.59E-11 | 0.622793 | -2.302 | 2.51E-12 | 0.662698 | -2.742 | 3.07E-05 | 0.7 |
| CYP4F22     | 126410 | NA     | NA       | NA       | NA      | NA       | NA       | -2.026 | 2.13E-09 | 0.678571 | -2.864 | 3.95E-05 | 0.7 |
| FAM3B       | 54097  | -2.027 | 3.27E-10 | 0.655738 | NA      | NA       | NA       | NA     | NA       | NA       | -2.287 | 7.50E-05 | 0.7 |
| RNF183      | 138065 | NA     | NA       | NA       | NA      | NA       | NA       | NA     | NA       | NA       | -2.099 | 0.000112 | 0.7 |
| VWDE        | 221806 | NA     | NA       | NA       | NA      | NA       | NA       | NA     | NA       | NA       | -2.415 | 0.000248 | 0.7 |
| KRT16       | 3868   | NA     | NA       | NA       | NA      | NA       | NA       | NA     | NA       | NA       | -2.102 | 0.00129  | 0.7 |
| LOC642587   | 642587 | NA     | NA       | NA       | NA      | NA       | NA       | NA     | NA       | NA       | -2.685 | 0.001317 | 0.7 |
| PPP4R4      | 57718  | NA     | NA       | NA       | NA      | NA       | NA       | NA     | NA       | NA       | -2.183 | 0.001629 | 0.7 |

Note: NA denotes the gene is not down regulated in that cancer stage.

Supplementary Table 4. Amplified regions

| <b>Cytoband</b> | <b>Start_position</b> | <b>End_position</b> |
|-----------------|-----------------------|---------------------|
| 1p11.2          | 120600000             | 121500000           |
| 1q21.1          | 142600000             | 147000000           |
| 1q21.2          | 147000000             | 150300000           |
| 1q21.3          | 150300000             | 155000000           |
| 1q22            | 155000000             | 156500000           |
| 1q23.1          | 156500000             | 159100000           |
| 1q23.2          | 159100000             | 160500000           |
| 1q23.3          | 160500000             | 165500000           |
| 1q24.1          | 165500000             | 167200000           |
| 1q24.2          | 167200000             | 170900000           |
| 1q24.3          | 170900000             | 172900000           |
| 1q25.1          | 172900000             | 176000000           |
| 1q25.2          | 176000000             | 180300000           |
| 1q25.3          | 180300000             | 185800000           |
| 1q31.1          | 185800000             | 190800000           |
| 1q31.2          | 190800000             | 193800000           |
| 1q31.3          | 193800000             | 198700000           |
| 1q32.1          | 198700000             | 207200000           |
| 1q32.2          | 207200000             | 211500000           |
| 1q32.3          | 211500000             | 214500000           |
| 1q41            | 214500000             | 224100000           |
| 1q42.11         | 224100000             | 224600000           |
| 1q42.12         | 224600000             | 227000000           |
| 1q42.13         | 227000000             | 230700000           |
| 1q42.2          | 230700000             | 234700000           |
| 1q42.3          | 234700000             | 236600000           |
| 1q43            | 236600000             | 243700000           |
| 1q44            | 243700000             | 249250621           |
| 16p13.3         | 0                     | 7900000             |
| 16p13.2         | 7900000               | 10500000            |
| 16p13.13        | 10500000              | 12600000            |
| 16p13.12        | 12600000              | 14800000            |
| 16p13.11        | 14800000              | 16800000            |
| 16p12.3         | 16800000              | 21200000            |
| 16p12.2         | 21200000              | 24200000            |
| 16p12.1         | 24200000              | 28100000            |
| 16p11.2         | 28100000              | 34600000            |
| 20q11.21        | 29400000              | 32100000            |
| 20q11.22        | 32100000              | 34400000            |
| 20q11.23        | 34400000              | 37600000            |
| 20q12           | 37600000              | 41700000            |
| 20q13.11        | 41700000              | 42100000            |
| 20q13.12        | 42100000              | 46400000            |
| 20q13.13        | 46400000              | 49800000            |
| 20q13.2         | 49800000              | 55000000            |



|          |           |           |
|----------|-----------|-----------|
| 20q13.31 | 55000000  | 56500000  |
| 20q13.32 | 56500000  | 58400000  |
| 20q13.33 | 58400000  | 63025520  |
| 8p11.1   | 43100000  | 45600000  |
| 8q11.1   | 45600000  | 48100000  |
| 8q11.21  | 48100000  | 52200000  |
| 8q11.22  | 52200000  | 52600000  |
| 8q11.23  | 52600000  | 55500000  |
| 8q12.1   | 55500000  | 61600000  |
| 8q12.2   | 61600000  | 62200000  |
| 8q12.3   | 62200000  | 66000000  |
| 8q13.1   | 66000000  | 68000000  |
| 8q13.2   | 68000000  | 70500000  |
| 8q13.3   | 70500000  | 73900000  |
| 8q21.11  | 73900000  | 78300000  |
| 8q21.12  | 78300000  | 80100000  |
| 8q21.13  | 80100000  | 84600000  |
| 8q21.2   | 84600000  | 86900000  |
| 8q21.3   | 86900000  | 93300000  |
| 8q22.1   | 93300000  | 99000000  |
| 8q22.2   | 99000000  | 101600000 |
| 8q22.3   | 101600000 | 106200000 |
| 8q23.1   | 106200000 | 110500000 |
| 8q23.2   | 110500000 | 112100000 |
| 8q23.3   | 112100000 | 117700000 |
| 8q24.11  | 117700000 | 119200000 |
| 8q24.12  | 119200000 | 122500000 |
| 8q24.13  | 122500000 | 127300000 |
| 8q24.21  | 127300000 | 131500000 |
| 8q24.22  | 131500000 | 136400000 |
| 8q24.23  | 136400000 | 139900000 |
| 8q24.3   | 139900000 | 146364022 |

Supplementary Table 5a. Evaluations on the concordance between expression and CNA for up-regulated genes located in amplification bands in overall patients.

| GeneName  | GeneID | fold CNA-associated | FDR      | cytoband | Pearson's correlation | Status            |
|-----------|--------|---------------------|----------|----------|-----------------------|-------------------|
| TPX2      | 22974  | 0.979955674         | 5.48E-36 | 20q11.21 | 0.331729825           | drive by CNA      |
| NUF2      | 83540  | 0.963225162         | 3.27E-24 | 1q23.3   | 0.32846242            | drive by CNA      |
| IQGAP3    | 128239 | 0.899340901         | 3.70E-23 | 1q22     | 0.313480744           | drive by CNA      |
| AURKA     | 6790   | 1.191872753         | 2.34E-61 | 20q13.2  | 0.480852097           | driven by CNA     |
| CCDC78    | 124093 | 1.199164513         | 4.77E-24 | 16p13.3  | 0.340447821           | driven by CNA     |
| GNG13     | 51764  | 1.614567685         | 9.52E-23 | 16p13.3  | 0.328336648           | driven by CNA     |
| UBE2C     | 11065  | 1.119444797         | 1.42E-34 | 20q13.12 | 0.311759672           | driven by CNA     |
| FAM83D    | 81610  | 1.032255021         | 7.24E-30 | 20q11.23 | 0.285806576           | driven by CNA     |
| MYBL2     | 4605   | 1.173765095         | 6.23E-28 | 20q13.12 | 0.261383604           | driven by CNA     |
| NEK2      | 4751   | 0.991649695         | 1.51E-30 | 1q32.3   | 0.296687961           | not driven by CNA |
| HAGHL     | 84264  | 0.79610432          | 1.00E-15 | 16p13.3  | 0.277643457           | not driven by CNA |
| DTL       | 51514  | 0.783509964         | 4.04E-23 | 1q32.3   | 0.27704762            | not driven by CNA |
| EXO1      | 9156   | 0.857428416         | 2.54E-18 | 1q43     | 0.257424837           | not driven by CNA |
| UBE2T     | 29089  | 0.787948542         | 3.39E-22 | 1q32.1   | 0.247741982           | not driven by CNA |
| CCDC19    | 25790  | 0.870449182         | 1.17E-15 | 1q23.2   | 0.233037511           | not driven by CNA |
| CENPF     | 1063   | 0.780688164         | 3.17E-19 | 1q41     | 0.231821563           | not driven by CNA |
| FAM72D    | 728833 | 0.629567591         | 6.69E-13 | 1q21.1   | 0.204378016           | not driven by CNA |
| KIF14     | 9928   | 0.869788504         | 1.23E-15 | 1q32.1   | 0.202207022           | not driven by CNA |
| FAM72B    | 653820 | 0.544826124         | 7.49E-11 | 1p11.2   | 0.199997426           | not driven by CNA |
| ASPM      | 259266 | 0.804741752         | 1.01E-15 | 1q31.3   | 0.196334855           | not driven by CNA |
| HIST2H3C  | 126961 | 0.683988011         | 1.62E-10 | 1q21.2   | 0.177584871           | not driven by CNA |
| C16orf59  | 80178  | 0.422625679         | 6.87E-10 | 16p13.3  | 0.14657828            | not driven by CNA |
| SYNGR3    | 9143   | 0.476030702         | 2.68E-06 | 16p13.3  | 0.133863326           | not driven by CNA |
| SRMS      | 6725   | 0.098005799         | 0.435872 | 20q13.33 | 0.099239201           | not driven by CNA |
| HIST3H2BB | 128312 | 0.408423075         | 0.004316 | 1q42.13  | 0.091339237           | not driven by CNA |
| PKMYT1    | 9088   | 0.336009792         | 7.29E-05 | 16p13.3  | 0.069630728           | not driven by CNA |
| CTHRC1    | 115908 | 0.186764281         | 0.017664 | 8q22.3   | 0.061521603           | not driven by CNA |
| WISP1     | 8840   | -0.088551891        | 0.35029  | 8q24.22  | -0.030220721          | not driven by CNA |
| PLK1      | 5347   | 0.069919371         | 0.400561 | 16p12.2  | -0.04532341           | not driven by CNA |

Supplementary Table 5b. Evaluations on the coorendence between expression and CNA for genes located in amplification bands in TNBC patients.

| GeneName | GeneID | fold CNA-associated change | FDR      | cytoband | Pearson's correlation | Status            |
|----------|--------|----------------------------|----------|----------|-----------------------|-------------------|
| PLK1     | 5347   | 0.230190395                | 0.182694 | 16p12.2  | 0.037959785           | not driven by CNA |
| UBE2C    | 11065  | 0.828438538                | 3.60E-06 | 20q13.12 | 0.310224168           | driven by CNA     |
| MYBL2    | 4605   | 0.616039529                | 0.001169 | 20q13.12 | 0.204560091           | not driven by CNA |
| TPX2     | 22974  | 0.669849397                | 2.53E-05 | 20q11.21 | 0.317537322           | driven by CNA     |
| IQGAP3   | 128239 | 1.624494179                | 4.16E-12 | 1q22     | 0.552582547           | driven by CNA     |
| NEK2     | 4751   | 1.217385626                | 4.61E-12 | 1q32.3   | 0.400655959           | driven by CNA     |
| ASPM     | 259266 | 1.227593745                | 2.39E-09 | 1q31.3   | 0.376586574           | driven by CNA     |
| EXO1     | 9156   | 1.211741576                | 6.61E-11 | 1q43     | 0.461163326           | driven by CNA     |
| PKMYT1   | 9088   | 0.428662926                | 0.021959 | 16p13.3  | 0.115722141           | not driven by CNA |
| AURKA    | 6790   | 0.686110218                | 5.96E-07 | 20q13.2  | 0.396639356           | driven by CNA     |
| FAM72B   | 653820 | 0.930680332                | 3.29E-06 | 1p11.2   | 0.33406944            | driven by CNA     |
| NUF2     | 83540  | 1.46355143                 | 3.69E-11 | 1q23.3   | 0.512662819           | driven by CNA     |
| FAM83D   | 81610  | 0.691262899                | 8.35E-05 | 20q11.23 | 0.239039736           | not driven by CNA |
| KIF14    | 9928   | 1.091691227                | 6.51E-08 | 1q32.1   | 0.333663067           | driven by CNA     |
| UBE2T    | 29089  | 0.979660003                | 1.28E-08 | 1q32.1   | 0.369047368           | driven by CNA     |
| FAM72A   | 729533 | 1.087675795                | 4.38E-07 | 1q32.1   | 0.28610451            | driven by CNA     |
| CENPF    | 1063   | 1.005608927                | 7.67E-08 | 1q41     | 0.332179927           | driven by CNA     |
| ZNF695   | 57116  | 1.500517352                | 2.98E-11 | 1q44     | 0.456820726           | driven by CNA     |
| FAM72D   | 728833 | 0.859930322                | 0.000847 | 1q21.1   | 0.277856135           | not driven by CNA |
| E2F1     | 1869   | 0.51341676                 | 0.000762 | 20q11.22 | 0.270471923           | not driven by CNA |
| DTL      | 51514  | 0.80119728                 | 3.56E-07 | 1q32.3   | 0.31588731            | driven by CNA     |
| RECQL4   | 9401   | 1.086202123                | 5.55E-09 | 8q24.3   | 0.450395601           | driven by CNA     |
| CTHRC1   | 115908 | 0.748109897                | 0.000961 | 8q22.3   | 0.272490435           | not driven by CNA |
| HIST2H3C | 126961 | 0.661723954                | 0.014653 | 1q21.2   | 0.223542703           | not driven by CNA |
| SH2D2A   | 9047   | 0.259575072                | 0.214219 | 1q23.1   | 0.173552499           | not driven by CNA |
| KIF26B   | 55083  | -0.082370301               | 0.786051 | 1q44     | -0.088879566          | not driven by CNA |
| COL9A3   | 1299   | 1.37353883                 | 0.003369 | 20q13.33 | 0.293835504           | not driven by CNA |
| C16orf59 | 80178  | 0.482220842                | 0.006602 | 16p13.3  | 0.158356804           | not driven by CNA |
| MEX3A    | 92312  | 1.832922188                | 1.04E-08 | 1q22     | 0.371195164           | driven by CNA     |
| PAQR4    | 124222 | 0.550295268                | 0.000191 | 16p13.3  | 0.267152833           | not driven by CNA |
| CCNE2    | 9134   | 1.021716379                | 3.55E-05 | 8q22.1   | 0.192865627           | driven by CNA     |

|            |       |             |          |         |             |                   |
|------------|-------|-------------|----------|---------|-------------|-------------------|
| KREMEN2    | 79412 | 0.730572952 | 0.024182 | 16p13.3 | 0.176155242 | not driven by CNA |
| HORMAD1    | 84072 | 3.164363379 | 0.000535 | 1q21.3  | 0.331586422 | driven by CNA     |
| C1orf106   | 55765 | 0.215822165 | 0.442202 | 1q32.1  | 0.111433413 | not driven by CNA |
| HIST2H2AA3 | 8337  | 0.042984967 | 0.874929 | 1q21.2  | 0.092448681 | not driven by CNA |
| SLC39A4    | 55630 | 0.815020686 | 0.000391 | 8q24.3  | 0.32521318  | driven by CNA     |

Supplementary Table 6a. 143 EEA genes in overall patients

| GeneName | GeneID |
|----------|--------|
| COL10A1  | 1300   |
| MMP11    | 4320   |
| IBSP     | 3381   |
| NEK2     | 4751   |
| PKMYT1   | 9088   |
| COL11A1  | 1301   |
| KIF4A    | 24137  |
| PPAPDC1A | 196051 |
| CCL11    | 6356   |
| CDC25C   | 995    |
| COMP     | 1311   |
| CST4     | 1472   |
| GABRD    | 2563   |
| PLAC1    | 10761  |
| MMP13    | 4322   |
| KIAA0101 | 9768   |
| IQGAP3   | 128239 |
| HAGHL    | 84264  |
| NUF2     | 83540  |
| TROAP    | 10024  |
| GJB2     | 2706   |
| MELK     | 9833   |
| SPC25    | 57405  |
| TPX2     | 22974  |
| UHRF1    | 29128  |
| PLK1     | 5347   |
| SCT      | 6343   |
| SPC24    | 147841 |
| CST1     | 1469   |
| PITX1    | 5307   |
| KIF20A   | 10112  |
| HSD17B6  | 8630   |
| SLC24A2  | 25769  |
| OR2B6    | 26212  |
| WBSCR28  | 135886 |
| WISP1    | 8840   |
| LRRC15   | 131578 |
| TDO2     | 6999   |
| EPYC     | 1833   |
| MMP1     | 4312   |
| CILP2    | 148113 |
| PBK      | 55872  |
| HJURP    | 55355  |
| DLGAP5   | 9787   |
| BUB1     | 699    |

|           |        |
|-----------|--------|
| NEIL3     | 55247  |
| CEP55     | 55165  |
| EXO1      | 9156   |
| ASF1B     | 55723  |
| UBE2T     | 29089  |
| KIF18B    | 146909 |
| ANLN      | 54443  |
| KIF2C     | 11004  |
| PTTG1     | 9232   |
| NUSAP1    | 51203  |
| HIST1H2BO | 8348   |
| C16orf59  | 80178  |
| HIST1H2AM | 8336   |
| CDC20     | 991    |
| KIF14     | 9928   |
| NDC80     | 10403  |
| RRM2      | 6241   |
| CDK1      | 983    |
| SKA3      | 221150 |
| CCNB2     | 9133   |
| KIFC1     | 3833   |
| CNIH2     | 254263 |
| HMMR      | 3161   |
| CKAP2L    | 150468 |
| FOXM1     | 2305   |
| DTL       | 51514  |
| TOP2A     | 7153   |
| CDKN3     | 1033   |
| CDC45     | 8318   |
| CST2      | 1470   |
| CHRNA6    | 8973   |
| PROC      | 5624   |
| ADAMTS14  | 140766 |
| ASPM      | 259266 |
| SGOL1     | 151648 |
| CENPF     | 1063   |
| BIRC5     | 332    |
| SKA1      | 220134 |
| DEPDC1B   | 55789  |
| RDM1      | 201299 |
| AURKB     | 9212   |
| CENPA     | 1058   |
| MKI67     | 4288   |
| CDCA8     | 55143  |
| TK1       | 7083   |
| GTSE1     | 51512  |
| NCAPG     | 64151  |

|           |           |
|-----------|-----------|
| CDCA5     | 113130    |
| RAD54L    | 8438      |
| HIST2H3C  | 126961    |
| GRM4      | 2914      |
| CDCA3     | 83461     |
| DEPDC1    | 55635     |
| GAGE12D   | 100132399 |
| HIST1H3H  | 8357      |
| HCN2      | 610       |
| HIST1H3J  | 8356      |
| HOXC13    | 3229      |
| SAMD14    | 201191    |
| AIM1L     | 55057     |
| SRMS      | 6725      |
| CCDC64    | 92558     |
| FABP6     | 2172      |
| CSAG1     | 158511    |
| LHX2      | 9355      |
| CTHRC1    | 115908    |
| FAM72D    | 728833    |
| S100P     | 6286      |
| HIST1H3D  | 8351      |
| HOXC11    | 3227      |
| VGFB      | 7425      |
| FAM64A    | 54478     |
| CCDC19    | 25790     |
| MCM10     | 55388     |
| ZWINT     | 11130     |
| PAFAH1B3  | 5050      |
| CKS2      | 1164      |
| HOXC10    | 3226      |
| FAM72B    | 653820    |
| HIST3H2BB | 128312    |
| CNTNAP2   | 26047     |
| HAPLN1    | 1404      |
| CENPM     | 79019     |
| TUBB3     | 10381     |
| MAPK8IP2  | 23542     |
| SYNGR3    | 9143      |
| ESPL1     | 9700      |
| CTXN1     | 404217    |
| NCAPH     | 23397     |
| OIP5      | 11339     |
| ERCC6L    | 54821     |
| RAD51     | 5888      |
| CCNA2     | 890       |
| UBE2S     | 27338     |

|       |       |
|-------|-------|
| KIF23 | 9493  |
| RTBDN | 83546 |
| CCNB1 | 891   |



Supplementary Table 6b. 221 EEA genes in TNBC patients

| GeneName | GeneID |
|----------|--------|
| KIF4A    | 24137  |
| MYBL2    | 4605   |
| PLK1     | 5347   |
| CCNB2    | 9133   |
| DLGAP5   | 9787   |
| CENPA    | 1058   |
| MELK     | 9833   |
| CDC45    | 8318   |
| FOXM1    | 2305   |
| ANLN     | 54443  |
| RRM2     | 6241   |
| CDC20    | 991    |
| PKMYT1   | 9088   |
| TROAP    | 10024  |
| HJURP    | 55355  |
| KIF2C    | 11004  |
| NDC80    | 10403  |
| CEP55    | 55165  |
| CDCA2    | 157313 |
| PBK      | 55872  |
| AURKB    | 9212   |
| KIF20A   | 10112  |
| SKA3     | 221150 |
| SKA1     | 220134 |
| SPC25    | 57405  |
| NEIL3    | 55247  |
| CDKN3    | 1033   |
| DEPDC1B  | 55789  |
| GTSE1    | 51512  |
| BUB1     | 699    |
| DEPDC1   | 55635  |
| KIF18B   | 146909 |
| CDC25C   | 995    |
| RAD54L   | 8438   |
| KIFC1    | 3833   |
| HMMR     | 3161   |
| PTTG1    | 9232   |
| CDCA5    | 113130 |
| ASF1B    | 55723  |
| CDCA3    | 83461  |
| CCNA2    | 890    |
| SPC24    | 147841 |
| TTK      | 7272   |
| NUSAP1   | 51203  |
| IBSP     | 3381   |

|          |        |
|----------|--------|
| NCAPG    | 64151  |
| CDCA8    | 55143  |
| BIRC5    | 332    |
| UHRF1    | 29128  |
| CDK1     | 983    |
| FAM83D   | 81610  |
| SGOL1    | 151648 |
| CKAP2L   | 150468 |
| NCAPH    | 23397  |
| COL10A1  | 1300   |
| SHCBP1   | 79801  |
| ERCC6L   | 54821  |
| MKI67    | 4288   |
| RAD51    | 5888   |
| OIP5     | 11339  |
| KIAA0101 | 9768   |
| MCM10    | 55388  |
| CCNE1    | 898    |
| MND1     | 84057  |
| CENPM    | 79019  |
| CENPE    | 1062   |
| KIF23    | 9493   |
| FAM64A   | 54478  |
| TACC3    | 10460  |
| TK1      | 7083   |
| TOP2A    | 7153   |
| PIF1     | 80119  |
| TDO2     | 6999   |
| KIF15    | 56992  |
| SLC7A5   | 8140   |
| MMP11    | 4320   |
| COL11A1  | 1301   |
| CKS2     | 1164   |
| VGFB     | 7425   |
| CCL11    | 6356   |
| CDC6     | 990    |
| SPAG5    | 10615  |
| PPAPDC1A | 196051 |
| E2F2     | 1870   |
| E2F1     | 1869   |
| OR2B6    | 26212  |
| CLSPN    | 63967  |
| CDT1     | 81620  |
| PRC1     | 9055   |
| POLQ     | 10721  |
| AIM1L    | 55057  |
| ACTL8    | 81569  |

|           |        |
|-----------|--------|
| EZH2      | 2146   |
| KIF11     | 3832   |
| CCNB1     | 891    |
| FANCA     | 2175   |
| CBX2      | 84733  |
| ESPL1     | 9700   |
| HIST1H2BO | 8348   |
| UBE2S     | 27338  |
| CNIH2     | 254263 |
| TRIP13    | 9319   |
| FAM72D    | 728833 |
| HIST1H2AM | 8336   |
| TUBB3     | 10381  |
| E2F8      | 79733  |
| FAM111B   | 374393 |
| LMNB1     | 4001   |
| CA9       | 768    |
| CASC5     | 57082  |
| HIST2H3C  | 126961 |
| SH2D2A    | 9047   |
| LHX2      | 9355   |
| MFAP2     | 4237   |
| MMP1      | 4312   |
| MMP13     | 4322   |
| GPR19     | 2842   |
| GPRIN1    | 114787 |
| GJB2      | 2706   |
| KIF18A    | 81930  |
| IL4I1     | 259307 |
| EPYC      | 1833   |
| RAD51AP1  | 10635  |
| BLM       | 641    |
| NMU       | 10874  |
| ESCO2     | 157570 |
| CLEC5A    | 23601  |
| E2F7      | 144455 |
| PRAME     | 23532  |
| ZIC1      | 7545   |
| CBS       | 875    |
| CXCL10    | 3627   |
| TNFRSF9   | 3604   |
| TYMS      | 7298   |
| KIAA1199  | 57214  |
| MKRN3     | 7681   |
| CCL7      | 6354   |
| HSD17B6   | 8630   |
| HAPLN1    | 1404   |

|           |        |
|-----------|--------|
| S100P     | 6286   |
| RAET1K    | 646024 |
| HMGB3     | 3149   |
| CDC25A    | 993    |
| C16orf59  | 80178  |
| HIST1H3B  | 8358   |
| PITX1     | 5307   |
| CENPI     | 2491   |
| GINS1     | 9837   |
| ZWINT     | 11130  |
| WDR62     | 284403 |
| ECE2      | 9718   |
| STIL      | 6491   |
| PAQR4     | 124222 |
| KREMEN2   | 79412  |
| B3GNT4    | 79369  |
| A2ML1     | 144568 |
| KCNK12    | 56660  |
| ADAMDEC1  | 27299  |
| TCAM1P    | 146771 |
| SCT       | 6343   |
| CTHRC1    | 115908 |
| CST1      | 1469   |
| ADAMTS14  | 140766 |
| ENTHD1    | 150350 |
| WBSCR28   | 135886 |
| CST4      | 1472   |
| CLEC6A    | 93978  |
| COMP      | 1311   |
| COL9A3    | 1299   |
| LRRC15    | 131578 |
| KIF26B    | 55083  |
| CCR8      | 1237   |
| RLTPR     | 146206 |
| CHST6     | 4166   |
| ETV7      | 51513  |
| DIAPH3    | 81624  |
| ULBP1     | 80329  |
| EME1      | 146956 |
| RDM1      | 201299 |
| ARHGAP11A | 9824   |
| C2orf48   | 348738 |
| KIF4B     | 285643 |
| CDCA7     | 83879  |
| PRR11     | 55771  |
| MAD2L1    | 4085   |
| LRP8      | 7804   |

|            |           |
|------------|-----------|
| GSG2       | 83903     |
| TLX1       | 3195      |
| CXCL11     | 6373      |
| KPNA2      | 3838      |
| TFR2       | 7036      |
| PSRC1      | 84722     |
| RCOR2      | 283248    |
| TLX1NB     | 100038246 |
| HN1        | 51155     |
| TLX3       | 30012     |
| CENPW      | 387103    |
| CIT        | 11113     |
| SOX11      | 6664      |
| GAL        | 51083     |
| OTX1       | 5013      |
| MFSD2B     | 388931    |
| STMN1      | 3925      |
| HPDL       | 84842     |
| DMRT1      | 1761      |
| C18orf56   | 494514    |
| CCDC150    | 284992    |
| CDC7       | 8317      |
| C1orf106   | 55765     |
| KIAA1524   | 57650     |
| HMGA1      | 3159      |
| POC1A      | 25886     |
| ZIC4       | 84107     |
| STRA8      | 346673    |
| SMC1B      | 27127     |
| GBX2       | 2637      |
| HIST2H2AA3 | 8337      |
| SIX2       | 10736     |
| H2AFX      | 3014      |

Supplementary Table 7a. Gene list in cluster 1

| GeneName | GeneID |
|----------|--------|
| IBSP     | 3381   |
| COL10A1  | 1300   |
| MMP1     | 4312   |
| MMP11    | 4320   |
| PLK1     | 5347   |
| COL11A1  | 1301   |
| CEP55    | 55165  |
| ANLN     | 54443  |
| KIF4A    | 24137  |
| CDC20    | 991    |
| MYBL2    | 4605   |
| MELK     | 9833   |
| FOXM1    | 2305   |
| MMP13    | 4322   |
| PPAPDC1A | 196051 |
| DEPDC1B  | 55789  |
| KIF2C    | 11004  |
| SPC24    | 147841 |
| CDCA2    | 157313 |
| DLGAP5   | 9787   |
| PKMYT1   | 9088   |
| CDC45    | 8318   |
| CCL11    | 6356   |
| GJB2     | 2706   |
| CKAP2L   | 150468 |
| TDO2     | 6999   |
| OR2B6    | 26212  |
| SHCBP1   | 79801  |
| HMMR     | 3161   |
| ASF1B    | 55723  |
| RRM2     | 6241   |
| PBK      | 55872  |
| EPYC     | 1833   |
| BUB1     | 699    |
| CDKN3    | 1033   |
| IL4I1    | 259307 |
| VGFB     | 7425   |
| UHRF1    | 29128  |
| CLEC5A   | 23601  |
| TNFRSF9  | 3604   |
| CLSPN    | 63967  |
| ADAMDEC1 | 27299  |
| SCT      | 6343   |
| TUBB3    | 10381  |
| AIM1L    | 55057  |

|            |        |
|------------|--------|
| ACTL8      | 81569  |
| KIAA1199   | 57214  |
| CASC5      | 57082  |
| CTHRC1     | 115908 |
| S100P      | 6286   |
| MFAP2      | 4237   |
| HSD17B6    | 8630   |
| CST1       | 1469   |
| LHX2       | 9355   |
| ENTHD1     | 150350 |
| ADAMTS14   | 140766 |
| CST4       | 1472   |
| HIST1H2AM  | 8336   |
| CLEC6A     | 93978  |
| CBS        | 875    |
| ZIC1       | 7545   |
| CXCL10     | 3627   |
| CA9        | 768    |
| HIST1H2BO  | 8348   |
| CCR8       | 1237   |
| LRRC15     | 131578 |
| HAPLN1     | 1404   |
| KIF26B     | 55083  |
| CHST6      | 4166   |
| COL9A3     | 1299   |
| MKRN3      | 7681   |
| COMP       | 1311   |
| RLTPR      | 146206 |
| PITX1      | 5307   |
| CXCL11     | 6373   |
| TFR2       | 7036   |
| KREMEN2    | 79412  |
| C1orf106   | 55765  |
| B3GNT4     | 79369  |
| STRA8      | 346673 |
| GBX2       | 2637   |
| HIST2H2AA3 | 8337   |
| SIX2       | 10736  |

Supplementary Table 7b. Gene list in cluster 2

| GeneName | GeneID |
|----------|--------|
| IBSP     | 3381   |
| COL10A1  | 1300   |
| MMP1     | 4312   |
| MMP11    | 4320   |
| PLK1     | 5347   |
| COL11A1  | 1301   |
| CEP55    | 55165  |
| ANLN     | 54443  |
| KIF4A    | 24137  |
| CDC20    | 991    |
| MYBL2    | 4605   |
| MELK     | 9833   |
| CCNB2    | 9133   |
| HJURP    | 55355  |
| CDCA3    | 83461  |
| SKA1     | 220134 |
| CENPA    | 1058   |
| FOXM1    | 2305   |
| MMP13    | 4322   |
| NDC80    | 10403  |
| PPAPDC1A | 196051 |
| TROAP    | 10024  |
| DEPDC1B  | 55789  |
| KIF2C    | 11004  |
| SPC24    | 147841 |
| CDCA2    | 157313 |
| NUSAP1   | 51203  |
| KIF20A   | 10112  |
| SPC25    | 57405  |
| DLGAP5   | 9787   |
| MKI67    | 4288   |
| PKMYT1   | 9088   |
| CDC45    | 8318   |
| TACC3    | 10460  |
| CDCA8    | 55143  |
| GTSE1    | 51512  |
| PTTG1    | 9232   |
| CCNA2    | 890    |
| FAM83D   | 81610  |
| CCL11    | 6356   |
| CDCA5    | 113130 |
| DEPDC1   | 55635  |
| GPR19    | 2842   |
| GJB2     | 2706   |
| KIFC1    | 3833   |



|          |        |
|----------|--------|
| SKA3     | 221150 |
| CKAP2L   | 150468 |
| OIP5     | 11339  |
| TDO2     | 6999   |
| SGOL1    | 151648 |
| OR2B6    | 26212  |
| NCAPH    | 23397  |
| RAD54L   | 8438   |
| AURKB    | 9212   |
| CDC25C   | 995    |
| KIF18B   | 146909 |
| SHCBP1   | 79801  |
| HMMR     | 3161   |
| NEIL3    | 55247  |
| ASF1B    | 55723  |
| TTK      | 7272   |
| RRM2     | 6241   |
| PBK      | 55872  |
| CDK1     | 983    |
| EPYC     | 1833   |
| CENPE    | 1062   |
| PIF1     | 80119  |
| NCAPG    | 64151  |
| BUB1     | 699    |
| CDKN3    | 1033   |
| KIF15    | 56992  |
| ERCC6L   | 54821  |
| FAM64A   | 54478  |
| IL4I1    | 259307 |
| VGFB     | 7425   |
| KIF23    | 9493   |
| BIRC5    | 332    |
| TOP2A    | 7153   |
| KIAA0101 | 9768   |
| MND1     | 84057  |
| UHRF1    | 29128  |
| SLC7A5   | 8140   |
| CENPM    | 79019  |
| PRC1     | 9055   |
| GPRIN1   | 114787 |
| SPAG5    | 10615  |
| RAD51    | 5888   |
| CKS2     | 1164   |
| CLEC5A   | 23601  |
| CNIH2    | 254263 |
| ADAMDEC1 | 27299  |
| FAM111B  | 374393 |

|           |        |
|-----------|--------|
| CCNE1     | 898    |
| FAM72D    | 728833 |
| SCT       | 6343   |
| MCM10     | 55388  |
| EZH2      | 2146   |
| E2F1      | 1869   |
| TUBB3     | 10381  |
| NMU       | 10874  |
| TK1       | 7083   |
| LMNB1     | 4001   |
| AIM1L     | 55057  |
| E2F8      | 79733  |
| ACTL8     | 81569  |
| FANCA     | 2175   |
| TCAM1P    | 146771 |
| E2F2      | 1870   |
| CTHRC1    | 115908 |
| S100P     | 6286   |
| MFAP2     | 4237   |
| RAD51AP1  | 10635  |
| KIF11     | 3832   |
| HSD17B6   | 8630   |
| CST1      | 1469   |
| KIF18A    | 81930  |
| LHX2      | 9355   |
| CDC6      | 990    |
| HIST2H3C  | 126961 |
| ESPL1     | 9700   |
| ENTHD1    | 150350 |
| ADAMTS14  | 140766 |
| WBSCR28   | 135886 |
| HIST1H2AM | 8336   |
| CDT1      | 81620  |
| CBS       | 875    |
| ZIC1      | 7545   |
| CCNB1     | 891    |
| UBE2S     | 27338  |
| TRIP13    | 9319   |
| CBX2      | 84733  |
| CXCL10    | 3627   |
| CA9       | 768    |
| SH2D2A    | 9047   |
| TYMS      | 7298   |
| POLQ      | 10721  |
| HIST1H2BO | 8348   |
| CCL7      | 6354   |
| PRAME     | 23532  |

|           |           |
|-----------|-----------|
| ETV7      | 51513     |
| LRRC15    | 131578    |
| HAPLN1    | 1404      |
| KIF26B    | 55083     |
| CHST6     | 4166      |
| RAET1K    | 646024    |
| COL9A3    | 1299      |
| MKRN3     | 7681      |
| COMP      | 1311      |
| RLTPR     | 146206    |
| C16orf59  | 80178     |
| CDC25A    | 993       |
| DIAPH3    | 81624     |
| CENPI     | 2491      |
| PITX1     | 5307      |
| ULBP1     | 80329     |
| HMGB3     | 3149      |
| EME1      | 146956    |
| HIST1H3B  | 8358      |
| ARHGAP11A | 9824      |
| GINS1     | 9837      |
| RDM1      | 201299    |
| ZWINT     | 11130     |
| KIF4B     | 285643    |
| C2orf48   | 348738    |
| WDR62     | 284403    |
| ECE2      | 9718      |
| CDCA7     | 83879     |
| MAD2L1    | 4085      |
| LRP8      | 7804      |
| KPNA2     | 3838      |
| CXCL11    | 6373      |
| TLX1      | 3195      |
| PSRC1     | 84722     |
| TFR2      | 7036      |
| HN1       | 51155     |
| RCOR2     | 283248    |
| TLX1NB    | 100038246 |
| PAQR4     | 124222    |
| CENPW     | 387103    |
| CIT       | 11113     |
| TLX3      | 30012     |
| STMN1     | 3925      |
| MFSD2B    | 388931    |
| OTX1      | 5013      |
| GAL       | 51083     |
| SOX11     | 6664      |

|            |        |
|------------|--------|
| KREMEN2    | 79412  |
| HPDL       | 84842  |
| CCDC150    | 284992 |
| C18orf56   | 494514 |
| DMRT1      | 1761   |
| CDC7       | 8317   |
| POC1A      | 25886  |
| HMGA1      | 3159   |
| C1orf106   | 55765  |
| B3GNT4     | 79369  |
| KCNK12     | 56660  |
| A2ML1      | 144568 |
| ZIC4       | 84107  |
| STRA8      | 346673 |
| GBX2       | 2637   |
| SMC1B      | 27127  |
| H2AFX      | 3014   |
| HIST2H2AA3 | 8337   |
| SIX2       | 10736  |

Supplementary Table 7c. Gene list in cluster 3

| <b>GeneName</b> | <b>GeneID</b> |
|-----------------|---------------|
| IBSP            | 3381          |
| COL10A1         | 1300          |
| MMP1            | 4312          |
| MMP11           | 4320          |
| PLK1            | 5347          |
| COL11A1         | 1301          |
| CEP55           | 55165         |
| ANLN            | 54443         |
| KIF4A           | 24137         |
| CDC20           | 991           |
| MYBL2           | 4605          |
| MELK            | 9833          |
| CCNB2           | 9133          |
| HJURP           | 55355         |
| CDCA3           | 83461         |
| SKA1            | 220134        |
| CENPA           | 1058          |
| FOXM1           | 2305          |
| MMP13           | 4322          |
| NDC80           | 10403         |
| PPAPDC1A        | 196051        |
| TROAP           | 10024         |
| DEPDC1B         | 55789         |
| KIF2C           | 11004         |
| SPC24           | 147841        |
| CDCA2           | 157313        |
| NUSAP1          | 51203         |
| KIF20A          | 10112         |
| SPC25           | 57405         |
| DLGAP5          | 9787          |
| MKI67           | 4288          |
| PKMYT1          | 9088          |
| CDC45           | 8318          |
| TACC3           | 10460         |
| CDCA8           | 55143         |
| GTSE1           | 51512         |
| PTTG1           | 9232          |
| CCNA2           | 890           |
| FAM83D          | 81610         |
| CCL11           | 6356          |
| CDCA5           | 113130        |
| DEPDC1          | 55635         |
| GPR19           | 2842          |
| GJB2            | 2706          |
| KIFC1           | 3833          |

|          |        |
|----------|--------|
| SKA3     | 221150 |
| CKAP2L   | 150468 |
| OIP5     | 11339  |
| TDO2     | 6999   |
| SGOL1    | 151648 |
| OR2B6    | 26212  |
| NCAPH    | 23397  |
| RAD54L   | 8438   |
| AURKB    | 9212   |
| CDC25C   | 995    |
| KIF18B   | 146909 |
| SHCBP1   | 79801  |
| HMMR     | 3161   |
| NEIL3    | 55247  |
| ASF1B    | 55723  |
| TTK      | 7272   |
| RRM2     | 6241   |
| PBK      | 55872  |
| CDK1     | 983    |
| EPYC     | 1833   |
| CENPE    | 1062   |
| PIF1     | 80119  |
| NCAPG    | 64151  |
| BUB1     | 699    |
| CDKN3    | 1033   |
| KIF15    | 56992  |
| ERCC6L   | 54821  |
| FAM64A   | 54478  |
| IL4I1    | 259307 |
| VGF      | 7425   |
| KIF23    | 9493   |
| BIRC5    | 332    |
| TOP2A    | 7153   |
| KIAA0101 | 9768   |
| MND1     | 84057  |
| UHRF1    | 29128  |
| SLC7A5   | 8140   |
| CENPM    | 79019  |
| PRC1     | 9055   |
| GPRIN1   | 114787 |
| SPAG5    | 10615  |
| RAD51    | 5888   |
| CKS2     | 1164   |
| CLEC5A   | 23601  |
| TNFRSF9  | 3604   |
| CNIH2    | 254263 |
| CLSPN    | 63967  |

|           |        |
|-----------|--------|
| ADAMDEC1  | 27299  |
| FAM111B   | 374393 |
| CCNE1     | 898    |
| FAM72D    | 728833 |
| SCT       | 6343   |
| MCM10     | 55388  |
| EZH2      | 2146   |
| E2F1      | 1869   |
| TUBB3     | 10381  |
| NMU       | 10874  |
| TK1       | 7083   |
| BLM       | 641    |
| LMNB1     | 4001   |
| AIM1L     | 55057  |
| E2F8      | 79733  |
| ACTL8     | 81569  |
| FANCA     | 2175   |
| TCAM1P    | 146771 |
| E2F2      | 1870   |
| KIAA1199  | 57214  |
| CASC5     | 57082  |
| ESCO2     | 157570 |
| CTHRC1    | 115908 |
| S100P     | 6286   |
| MFAP2     | 4237   |
| RAD51AP1  | 10635  |
| KIF11     | 3832   |
| HSD17B6   | 8630   |
| CST1      | 1469   |
| KIF18A    | 81930  |
| LHX2      | 9355   |
| CDC6      | 990    |
| HIST2H3C  | 126961 |
| ESPL1     | 9700   |
| E2F7      | 144455 |
| ENTHD1    | 150350 |
| ADAMTS14  | 140766 |
| CST4      | 1472   |
| WBSCR28   | 135886 |
| HIST1H2AM | 8336   |
| CDT1      | 81620  |
| CLEC6A    | 93978  |
| CBS       | 875    |
| ZIC1      | 7545   |
| CCNB1     | 891    |
| UBE2S     | 27338  |
| TRIP13    | 9319   |

|           |        |
|-----------|--------|
| CBX2      | 84733  |
| CXCL10    | 3627   |
| CA9       | 768    |
| SH2D2A    | 9047   |
| TYMS      | 7298   |
| POLQ      | 10721  |
| HIST1H2BO | 8348   |
| CCL7      | 6354   |
| CCR8      | 1237   |
| PRAME     | 23532  |
| ETV7      | 51513  |
| LRRC15    | 131578 |
| HAPLN1    | 1404   |
| KIF26B    | 55083  |
| CHST6     | 4166   |
| RAET1K    | 646024 |
| COL9A3    | 1299   |
| MKRN3     | 7681   |
| COMP      | 1311   |
| RLTPR     | 146206 |
| C16orf59  | 80178  |
| CDC25A    | 993    |
| DIAPH3    | 81624  |
| CENPI     | 2491   |
| PITX1     | 5307   |
| ULBP1     | 80329  |
| HMGB3     | 3149   |
| HIST1H3B  | 8358   |
| ARHGAP11A | 9824   |
| GIN51     | 9837   |
| RDM1      | 201299 |
| ZWINT     | 11130  |
| KIF4B     | 285643 |
| C2orf48   | 348738 |
| WDR62     | 284403 |
| ECE2      | 9718   |
| STIL      | 6491   |
| MAD2L1    | 4085   |
| LRP8      | 7804   |
| PRR11     | 55771  |
| GSG2      | 83903  |
| KPNA2     | 3838   |
| CXCL11    | 6373   |
| TLX1      | 3195   |
| PSRC1     | 84722  |
| TFR2      | 7036   |
| RCOR2     | 283248 |



|            |           |
|------------|-----------|
| TLX1NB     | 100038246 |
| PAQR4      | 124222    |
| CENPW      | 387103    |
| CIT        | 11113     |
| MFSD2B     | 388931    |
| OTX1       | 5013      |
| GAL        | 51083     |
| SOX11      | 6664      |
| KREMEN2    | 79412     |
| HPDL       | 84842     |
| CCDC150    | 284992    |
| DMRT1      | 1761      |
| CDC7       | 8317      |
| HMGA1      | 3159      |
| KIAA1524   | 57650     |
| C1orf106   | 55765     |
| B3GNT4     | 79369     |
| KCNK12     | 56660     |
| A2ML1      | 144568    |
| ZIC4       | 84107     |
| STRA8      | 346673    |
| GBX2       | 2637      |
| SMC1B      | 27127     |
| HIST2H2AA3 | 8337      |
| SIX2       | 10736     |

Supplementary Table 7d. Gene list in cluster 4

| GeneName | GeneID |
|----------|--------|
| IBSP     | 3381   |
| COL10A1  | 1300   |
| MMP1     | 4312   |
| MMP11    | 4320   |
| PLK1     | 5347   |
| COL11A1  | 1301   |
| CEP55    | 55165  |
| ANLN     | 54443  |
| KIF4A    | 24137  |
| CDC20    | 991    |
| MYBL2    | 4605   |
| MELK     | 9833   |
| CCNB2    | 9133   |
| HJURP    | 55355  |
| CDCA3    | 83461  |
| SKA1     | 220134 |
| CENPA    | 1058   |
| FOXM1    | 2305   |
| MMP13    | 4322   |
| NDC80    | 10403  |
| PPAPDC1A | 196051 |
| TROAP    | 10024  |
| DEPDC1B  | 55789  |
| KIF2C    | 11004  |
| SPC24    | 147841 |
| CDCA2    | 157313 |
| NUSAP1   | 51203  |
| KIF20A   | 10112  |
| SPC25    | 57405  |
| DLGAP5   | 9787   |
| MKI67    | 4288   |
| PKMYT1   | 9088   |
| CDC45    | 8318   |
| TACC3    | 10460  |
| CDCA8    | 55143  |
| GTSE1    | 51512  |
| PTTG1    | 9232   |
| CCNA2    | 890    |
| FAM83D   | 81610  |
| CCL11    | 6356   |
| CDCA5    | 113130 |
| DEPDC1   | 55635  |
| GPR19    | 2842   |
| GJB2     | 2706   |
| KIFC1    | 3833   |

|          |        |
|----------|--------|
| SKA3     | 221150 |
| CKAP2L   | 150468 |
| OIP5     | 11339  |
| TDO2     | 6999   |
| SGOL1    | 151648 |
| OR2B6    | 26212  |
| NCAPH    | 23397  |
| RAD54L   | 8438   |
| AURKB    | 9212   |
| CDC25C   | 995    |
| KIF18B   | 146909 |
| SHCBP1   | 79801  |
| HMMR     | 3161   |
| NEIL3    | 55247  |
| ASF1B    | 55723  |
| TTK      | 7272   |
| RRM2     | 6241   |
| PBK      | 55872  |
| CDK1     | 983    |
| EPYC     | 1833   |
| CENPE    | 1062   |
| PIF1     | 80119  |
| NCAPG    | 64151  |
| BUB1     | 699    |
| CDKN3    | 1033   |
| KIF15    | 56992  |
| ERCC6L   | 54821  |
| FAM64A   | 54478  |
| IL4I1    | 259307 |
| VGF      | 7425   |
| KIF23    | 9493   |
| BIRC5    | 332    |
| TOP2A    | 7153   |
| KIAA0101 | 9768   |
| MND1     | 84057  |
| UHRF1    | 29128  |
| SLC7A5   | 8140   |
| CENPM    | 79019  |
| PRC1     | 9055   |
| GPRIN1   | 114787 |
| SPAG5    | 10615  |
| RAD51    | 5888   |
| CKS2     | 1164   |
| CLEC5A   | 23601  |
| TNFRSF9  | 3604   |
| CNIH2    | 254263 |
| CLSPN    | 63967  |

|           |        |
|-----------|--------|
| ADAMDEC1  | 27299  |
| FAM111B   | 374393 |
| CCNE1     | 898    |
| FAM72D    | 728833 |
| SCT       | 6343   |
| MCM10     | 55388  |
| EZH2      | 2146   |
| E2F1      | 1869   |
| TUBB3     | 10381  |
| NMU       | 10874  |
| TK1       | 7083   |
| BLM       | 641    |
| LMNB1     | 4001   |
| AIM1L     | 55057  |
| E2F8      | 79733  |
| ACTL8     | 81569  |
| FANCA     | 2175   |
| TCAM1P    | 146771 |
| E2F2      | 1870   |
| KIAA1199  | 57214  |
| CASC5     | 57082  |
| ESCO2     | 157570 |
| CTHRC1    | 115908 |
| S100P     | 6286   |
| MFAP2     | 4237   |
| RAD51AP1  | 10635  |
| KIF11     | 3832   |
| HSD17B6   | 8630   |
| CST1      | 1469   |
| KIF18A    | 81930  |
| LHX2      | 9355   |
| CDC6      | 990    |
| HIST2H3C  | 126961 |
| ESPL1     | 9700   |
| E2F7      | 144455 |
| ENTHD1    | 150350 |
| ADAMTS14  | 140766 |
| CST4      | 1472   |
| WBSCR28   | 135886 |
| HIST1H2AM | 8336   |
| CDT1      | 81620  |
| CLEC6A    | 93978  |
| CBS       | 875    |
| ZIC1      | 7545   |
| CCNB1     | 891    |
| UBE2S     | 27338  |
| TRIP13    | 9319   |

|           |        |
|-----------|--------|
| CBX2      | 84733  |
| CXCL10    | 3627   |
| CA9       | 768    |
| SH2D2A    | 9047   |
| TYMS      | 7298   |
| POLQ      | 10721  |
| HIST1H2BO | 8348   |
| CCL7      | 6354   |
| CCR8      | 1237   |
| PRAME     | 23532  |
| ETV7      | 51513  |
| LRRC15    | 131578 |
| HAPLN1    | 1404   |
| KIF26B    | 55083  |
| CHST6     | 4166   |
| RAET1K    | 646024 |
| COL9A3    | 1299   |
| MKRN3     | 7681   |
| COMP      | 1311   |
| RLTPR     | 146206 |
| C16orf59  | 80178  |
| CDC25A    | 993    |
| DIAPH3    | 81624  |
| CENPI     | 2491   |
| PITX1     | 5307   |
| ULBP1     | 80329  |
| HMGB3     | 3149   |
| EME1      | 146956 |
| HIST1H3B  | 8358   |
| ARHGAP11A | 9824   |
| GIN51     | 9837   |
| RDM1      | 201299 |
| ZWINT     | 11130  |
| KIF4B     | 285643 |
| C2orf48   | 348738 |
| WDR62     | 284403 |
| ECE2      | 9718   |
| STIL      | 6491   |
| CDCA7     | 83879  |
| MAD2L1    | 4085   |
| LRP8      | 7804   |
| PRR11     | 55771  |
| GSG2      | 83903  |
| KPNA2     | 3838   |
| CXCL11    | 6373   |
| TLX1      | 3195   |
| PSRC1     | 84722  |

|            |           |
|------------|-----------|
| TFR2       | 7036      |
| HN1        | 51155     |
| RCOR2      | 283248    |
| TLX1NB     | 100038246 |
| PAQR4      | 124222    |
| CENPW      | 387103    |
| CIT        | 11113     |
| TLX3       | 30012     |
| STMN1      | 3925      |
| MFSD2B     | 388931    |
| OTX1       | 5013      |
| GAL        | 51083     |
| SOX11      | 6664      |
| KREMEN2    | 79412     |
| HPDL       | 84842     |
| CCDC150    | 284992    |
| C18orf56   | 494514    |
| DMRT1      | 1761      |
| CDC7       | 8317      |
| POC1A      | 25886     |
| HMGA1      | 3159      |
| KIAA1524   | 57650     |
| C1orf106   | 55765     |
| B3GNT4     | 79369     |
| KCNK12     | 56660     |
| A2ML1      | 144568    |
| ZIC4       | 84107     |
| STRA8      | 346673    |
| GBX2       | 2637      |
| SMC1B      | 27127     |
| H2AFX      | 3014      |
| HIST2H2AA3 | 8337      |
| SIX2       | 10736     |

Supplementary Table 8a. Analyses of cluster 1 genes and their association with CIN or TME

| Section | Cluster 1 Gene | Entrez Gene ID | Process                                     | Hypoxia Response? | PubmedID                     | Summary                                                                                                                                                                  |
|---------|----------------|----------------|---------------------------------------------|-------------------|------------------------------|--------------------------------------------------------------------------------------------------------------------------------------------------------------------------|
| TME     | HMMR           | 3161           | Spindle Formation, Migration                | Yes               | 12808028, 8634437            | RHMM localizes to the centrosome and functions in the maintenance of spindle integrity. Interacts with Hyaluronan a glycosaminoglycan present in the ECM                 |
| TME     | CA9            | 768            | Metabolism, Hypoxia                         | Yes               | 24146383                     | Hypoxia-induced upregulation is a component of the complex response of cancer cells to microenvironment                                                                  |
| TME     | CEMIP          | 57214          | Migration, Hypoxia                          | Yes               | 28819426                     | Overexpression protects tumour from microenvironment in hypoxia by stimulating the Wnt, EGFR, FGFR pathway, role in cytokine pathway                                     |
| TME     | CTHRC1         | 115908         | Extracellular Matrix, Angiogenesis, Hypoxia | Yes               | 16778098, 27686285, 25263696 | Involved in angiogenesis and Wnt signalling, activates hypoxia-inducible factor 1 $\alpha$ (HIF-1 $\alpha$ ) and vascular endothelial growth factor (VEGF)               |
| TME     | CXCL11         | 6373           | Immune Response                             | Yes               | 24940911                     | Chemokine expression in the tumor microenvironment regulates different processes                                                                                         |
| TME     | MMP1           | 4312           | Extracellular Matrix, Hypoxia               | Yes               | 26343184                     | Hypoxia-induced expression accompanied by stabilization of hypoxia-inducible transcription factors (HIF)-1 $\alpha$ and HIF-2 $\alpha$ , and a rise in intracellular ROS |
| TME     | TNFRSF9        | 3604           | Lymphocyte Activation                       | Yes               | 8262389                      | Member of the human nerve-growth-factor/tumor-necrosis-factor receptor family                                                                                            |
| TME     | COL11A1        | 1301           | Extracellular Matrix                        | Yes               | 10486316                     | Collagen protein in extracellular matrix                                                                                                                                 |
| TME     | DEPDC1B        | 55789          | Adhesion                                    |                   | 25458010                     | Coordinates de-adhesion events and cell-cycle progression at mitosis                                                                                                     |
| TME     | S100P          | 6286           | DNA Damage Response                         |                   | 26967060, 25614008, 19187537 | Binds and inactivates p53. Present in microenvironment                                                                                                                   |
| TME     | ADAMDEC1       | 27299          | Immune Response                             |                   | 12037602                     | Secreted metalloprotease involved in immune response                                                                                                                     |
| TME     | ADAMTS14       | 140766         | Extracellular Matrix                        |                   | 25636539                     | Secreted protein with important role in extracellular matrix (ECM) assembly and degradation                                                                              |

|     |         |        |                                         |  |                       |                                                                                                                                                                                                                  |
|-----|---------|--------|-----------------------------------------|--|-----------------------|------------------------------------------------------------------------------------------------------------------------------------------------------------------------------------------------------------------|
| TME | CARMIL2 | 146206 | Migration                               |  | 19846667,<br>26466680 | Regulates actin assembly and actin-based cell motility and localizes to vimentin                                                                                                                                 |
| TME | CBS     | 875    | Angiogenesis,<br>Metabolism,<br>Hypoxia |  | 24730679,<br>24328859 | Production of hydrogen sulfide has important role in cellular bioenergetics, migration, and angiogenesis, and hypoxia-inducible factors regulate expression                                                      |
| TME | CCL11   | 6356   | Migration,<br>Inflammation              |  | 19351767              | Cancer-related inflammation and migration can be directly regulated by chemokines                                                                                                                                |
| TME | CCR8    | 1237   | Migration,<br>Inflammation              |  | 23363815              | Cancer-related inflammation and migration can be directly regulated by chemokines                                                                                                                                |
| TME | CLEC5A  | 23601  | Immune<br>Response                      |  | 12570670,<br>10449773 | Binds DAP12, involved in immune response                                                                                                                                                                         |
| TME | CLEC6A  | 93978  | Immune<br>Response                      |  | 16423983              | C-type lectin-like receptor carbohydrate recognition by immune cells                                                                                                                                             |
| TME | COL10A1 | 1300   | Extracellular<br>Matrix                 |  | 22894674              | Collagen protein expressed in microenvironment                                                                                                                                                                   |
| TME | CXCL10  | 3627   | Immune<br>Response,<br>Hypoxia          |  | 28592115,<br>24799675 | Present in tumor environment, may have role in signalling under hypoxic conditions                                                                                                                               |
| TME | HAPLN1  | 1404   | Extracellular<br>Matrix                 |  | 22159717              | Extracellular matrix component secreted by tumour cells                                                                                                                                                          |
| TME | IL41    | 259307 | Metabolism,<br>Immune<br>Response       |  | 28405502,<br>19436310 | Limits the CD8+ T cell mediated immune response                                                                                                                                                                  |
| TME | KIF26B  | 55083  | Adhesion,<br>Migration                  |  | 28581513,<br>25652119 | Regulation of adhesion in mesenchymal cell, and inhibits VEGF signaling pathway to promote metastasis                                                                                                            |
| TME | LHX2    | 9355   | Transcription                           |  | 24423492              | Involved in autocrine PDGF-B/PDGFR $\beta$ signalling loop required for cell migration, invasion and metastatic dissemination and paracrine PDGF-B/PDGFR $\beta$ signaling to support blood vessel functionality |
| TME | MMP11   | 4320   | Extracellular<br>Matrix                 |  | 26892540              | Matrix metalloproteinase family have capacity to remodel extracellular matrix                                                                                                                                    |



|       |        |        |                             |     |                    |                                                                                                             |
|-------|--------|--------|-----------------------------|-----|--------------------|-------------------------------------------------------------------------------------------------------------|
| TME   | MMP13  | 4322   | Extracellular Matrix        |     | 22992737, 20371345 | Matrix metalloproteinase family have capacity to remodel extracellular matrix, can promote angiogenesis     |
| TME   | TDO2   | 6999   | Metabolism, Immune Response |     | 25628622           | Key regulator of innate and adaptive immunity plays a role in cancer-induced immunosuppression              |
| TME   | PITX1  | 5307   | Transcription, Hypoxia      |     | 25558831           | A transcription factor that helps promote specificity in HIF-1 $\alpha$ dependent target gene activation    |
| TME   | TFR2   | 7036   | Angiogenesis, Hypoxia       |     | 20360937           | In vitro hypoxic conditions induce a significant Tfr2 up-regulation suggesting a role in tumor angiogenesis |
| TME   | COL9A3 | 1299   | Extracellular Matrix        |     | 8660302            | Collagen protein in extracellular matrix                                                                    |
| TME   | COMP   | 1311   | Extracellular Matrix        |     | 16051604           | Cartilage oligomeric matrix protein extracellular matrix component                                          |
| TME   | CST1   | 1469   | Protease Inhibitors         |     | UniProt            | Cysteine-type endopeptidase inhibitor activity, same family as CST4                                         |
| TME   | CST4   | 1472   | Protease Inhibitors         |     | 3488317            | Cysteine-type endopeptidase inhibitor activity                                                              |
| TME   | EPYC   | 1833   | Extracellular Matrix        |     | 11292372           | Cartilage proteoglycan in extracellular matrix                                                              |
| TME   | LRRC15 | 131578 | Extracellular Matrix        |     | 16098915           | May contribute to regulation of cell-matrix adhesion interactions in astrocytes                             |
| TME   | MFAP2  | 4237   | Extracellular Matrix        |     | 26167404           | Component of extracellular microfibrils                                                                     |
| TME-R | GJB2   | 2706   | Cell-cell Communication     |     | 22514560           | Cell adhesion and gap junction associated                                                                   |
| TME-R | IBSP   | 3381   | Extracellular Matrix        |     | 24103036           | Extracellular matrix component that can bind to integrin                                                    |
| TME-R | SCT    | 6343   | Endocrine Signalling        |     | 11060443           | Endocrine hormone with possible neuroendocrine function                                                     |
| TME-R | VPF    | 7425   | Endocrine Signalling        |     | 19194657           | VPF is a precursor of multiple bioactive peptides with diverse neuroendocrine functions                     |
| MISC  | B3GNT4 | 79369  | Glycosylation               | Yes |                    |                                                                                                             |

|       |         |        |                              |     |                    |                                                                                                                                   |
|-------|---------|--------|------------------------------|-----|--------------------|-----------------------------------------------------------------------------------------------------------------------------------|
| MISC  | ACTL8   | 81569  | NA                           |     |                    |                                                                                                                                   |
| MISC  | CHST6   | 4166   | Glycosaminoglycan metabolism |     |                    |                                                                                                                                   |
| MISC  | CRYBG2  | 55057  | NA                           |     |                    |                                                                                                                                   |
| MISC  | ENTHD1  | 150350 | NA                           |     |                    |                                                                                                                                   |
| MISC  | GBX2    | 2637   | Transcription                |     |                    |                                                                                                                                   |
| MISC  | HSD17B  | 8630   | Metabolism                   |     |                    |                                                                                                                                   |
| MISC  | INAVA   | 55765  | NA                           |     |                    |                                                                                                                                   |
| MISC  | MKRN3   | 7681   | Ubiquitination               |     |                    |                                                                                                                                   |
| MISC  | OR2B6   | 26212  | Olfactory Receptor           |     |                    |                                                                                                                                   |
| MISC  | PLPP4   | 196051 | Metabolism                   |     |                    |                                                                                                                                   |
| MISC  | SIX2    | 10736  | Transcription                |     |                    |                                                                                                                                   |
| MISC  | ZIC1    | 7545   | Transcription                |     |                    |                                                                                                                                   |
| CIN-R | HIST1H2 | 8336   | Chromatin                    | Yes | Uniprot            | Histone protein involved in nucleosome remodelling                                                                                |
| CIN-R | HIST2H2 | 8337   | Chromatin                    | Yes | Uniprot            | Histone protein involved in nucleosome remodelling                                                                                |
| CIN-R | HIST1H2 | 8348   | Chromatin                    |     | Uniprot            | Histone protein involved in nucleosome remodelling                                                                                |
| CIN-R | KREMEN2 | 79412  | Signalling                   |     | 12050670           | Dickkopf receptors that regulate Wnt/beta-catenin signalling                                                                      |
| CIN-R | MYBL2   | 4605   | Transcription                |     | 9840932, 23842645  | Expression is controlled by the DREAM multiprotein complex, which is crucial in coordinating cell cycle dependent gene expression |
| CIN-R | STRA8   | 346673 | Meiosis                      |     | 18799751           | Regulates meiotic initiation in both spermatogenesis and oogenesis                                                                |
| CIN   | ASF1B   | 55723  | Chromatin                    | Yes | 11897662           | Histone chaperones involved in replication-dependent nucleosome assembly                                                          |
| CIN   | CDC20   | 991    | Spindle Assembly Checkpoint  | Yes | 19528295, 15525512 | Loss of spindle assembly checkpoint-mediated inhibition of Cdc20 promotes tumorigenesis                                           |

|     |        |        |                                         |  |                                    |                                                                                                                                                                                                                                   |
|-----|--------|--------|-----------------------------------------|--|------------------------------------|-----------------------------------------------------------------------------------------------------------------------------------------------------------------------------------------------------------------------------------|
| CIN | ANLN   | 54443  | Cytokinesis                             |  | 16040610,<br>20732437              | Actin-binding protein localized at the cleavage furrow required for cytokinesis                                                                                                                                                   |
| CIN | BUB1   | 699    | Spindle<br>Assembly<br>Checkpoint       |  | 21646403,<br>19487456,<br>16760428 | Kinetochores-bound protein kinase is essential for spindle checkpoint signaling and correct chromosome alignment                                                                                                                  |
| CIN | CDC45  | 8318   | DNA<br>Replication                      |  | 23643534                           | Helicase essential for DNA replication, critical regulator of Myc-driven DNA replication stress                                                                                                                                   |
| CIN | CDCA2  | 157313 | Chromatin                               |  | 21820363,<br>16998479              | Coordinates chromosomal reorganization with nuclear envelope reassembly during mitotic exit                                                                                                                                       |
| CIN | CDKN3  | 1033   | Cell Cycle                              |  | 23775190                           | Spindle checkpoint phosphatase essential for normal mitosis and G1/S transition                                                                                                                                                   |
| CIN | CEP55  | 55165  | Cytokinesis                             |  | 16198290,<br>16406728,<br>25915844 | A direct transcriptional target of FOXM1, and PLK1 phosphorylation of CEP55 regulates CEP55 recruitment to the midbody                                                                                                            |
| CIN | CKAP2L | 150468 | Cell Cycle                              |  | 24260314,<br>17376772              | Mitotic spindle protein that functions in cell division of neural progenitors, degraded by APC/C-Cdh1 during mitotic exit                                                                                                         |
| CIN | CLSPN  | 63967  | DNA<br>Replication                      |  | 12766152,<br>11090622              | Inhibits Chk1 and ATR, downregulation of Claspin increases premature chromatin condensation                                                                                                                                       |
| CIN | DLGAP5 | 9787   | Spindle<br>Formation                    |  | 17118403,<br>15987997              | Microtubule-associated protein required for correct spindle formation                                                                                                                                                             |
| CIN | FOXM1  | 2305   | Transcription,<br>Hypoxia               |  | 23768511,<br>19097132              | FOXM1 for the maintenance of genomic stability and chromosomal integrity and regulates the expression of several cell cycle genes. Binding of hypoxia-inducible factor 1 (HIF-1) to the HIF-1 binding sites in the FoxM1 promoter |
| CIN | KIF4A  | 24137  | Cytokinesis,<br>Spindle<br>Organization |  | 15625105,<br>15326200,<br>15297875 | Functions in chromosome condensation and segregation                                                                                                                                                                              |
| CIN | KNL1   | 57082  | Kinetochores                            |  | 24344188                           | Required for Aurora B activity at kinetochores and kinetochore-microtubule attachment                                                                                                                                             |
| CIN | MELK   | 9833   | Mitotic<br>Progression                  |  | 15908796,<br>24844244              | Oncogenic kinase essential for mitotic progression in basal-like breast cancer cells                                                                                                                                              |

|     |        |        |                             |  |                              |                                                                                                                                                                                                                                                   |
|-----|--------|--------|-----------------------------|--|------------------------------|---------------------------------------------------------------------------------------------------------------------------------------------------------------------------------------------------------------------------------------------------|
| CIN | PBK    | 55872  | DNA Damage Response         |  | 17482142                     | A mitotic kinase that downregulates p53 by direct physical interaction                                                                                                                                                                            |
| CIN | PKMYT1 | 9088   | Mitotic Progression         |  | 12738781, 10504341, 7569953  | Plk1 substrate that prevents catastrophic premature entry into mitosis                                                                                                                                                                            |
| CIN | PLK1   | 5347   | Spindle Assembly Checkpoint |  | 18615013, 17376779, 16837776 | Functions include the regulation of centrosome maturation and spindle assembly, the removal of cohesins from chromosome arms, inactivation of anaphase-promoting complex/cyclosome inhibitors, and the regulation of mitotic exit and cytokinesis |
| CIN | RRM2   | 6241   | DNA Damage Repair           |  | 20159953                     | Ribonucleotide reductase rapidly accumulates at double-strand break sites                                                                                                                                                                         |
| CIN | SHCBP1 | 79801  | Cytokinesis                 |  | 27129942, 25486361           | Interacts with centralspindlin and is required for completion of cytokinesis                                                                                                                                                                      |
| CIN | SPC24  | 147841 | Kinetochores                |  | 14699129, 15961401, 27713128 | Kinetochores component for the stable kinetochores-microtubule interactions required for chromosome segregation                                                                                                                                   |
| CIN | UHRF1  | 29128  | DNA Methylation             |  | 24486181                     | DNA hypomethylation contributes to oncogenesis through multiple mechanisms, including chromosomal instability                                                                                                                                     |
| CIN | TUBB3  | 10381  | Cytoskeleton, Hypoxia       |  | 23321512, 18178340           | Contributes to Microtubule dynamics. TUBB3 increase upon hypoxia in A2780 cells                                                                                                                                                                   |
| CIN | KIF2C  | 11004  | Chromosome Segregation      |  | 23098759, 19060894, 14960279 | Microtubule-dependent molecular motor protein with critical role in chromosome movement and segregation. Antigen peptide presentation via MHC class II                                                                                            |

Supplementary Table 8b. Upstream regulators of cluster 1 genes and their association with CIN or TME

| Complex | Upstream | Entrez | Interacts with CIN/TME/Both | Hypoxia |
|---------|----------|--------|-----------------------------|---------|
|         | AJUBA    | 84962  |                             |         |
|         | ATF3     | 467    |                             |         |
|         | BARX2    | 8538   |                             |         |
|         | BRCA1    | 672    |                             |         |
|         | BUB1B    | 701    |                             |         |
|         | BUB3     | 9184   |                             |         |
|         | CASP7    | 840    |                             |         |
|         | CCNB1    | 891    |                             |         |
|         | CDC27    | 996    |                             |         |
|         | CDC7     | 8317   |                             |         |
|         | CDK1     | 983    |                             |         |
|         | CDK2     | 1017   |                             |         |
|         | CELF1    | 10658  |                             |         |
|         | CKS1B    | 1163   |                             |         |
|         | DRAP1    | 10589  |                             |         |
|         | DVL2     | 1856   |                             |         |
|         | FBXO5    | 26271  |                             |         |
|         | FBXW5    | 54461  |                             |         |
|         | FZR1     | 51343  |                             |         |
|         | HDAC1    | 3065   |                             |         |
|         | HERC2    | 8924   |                             |         |
|         | LATS1    | 9113   |                             |         |
|         | LIN28A   | 79727  |                             |         |
|         | MAD1L1   | 8379   |                             |         |
|         | MAD2L1   | 4085   |                             |         |
|         | MAD2L1BP | 9587   |                             |         |
|         | MAP2K1   | 5604   |                             |         |
|         | MBD2     | 8932   |                             |         |
|         | MIIP     | 60672  |                             |         |
|         | MIS12    | 79003  |                             |         |
|         | MSH6     | 2956   |                             |         |
|         | MXI1     | 4601   |                             |         |
|         | NCAPG    | 64151  |                             |         |
|         | NDC80    | 10403  |                             |         |
|         | NEDD1    | 121441 |                             |         |
|         | NINL     | 22981  |                             |         |
|         | NOTCH3   | 4854   |                             |         |
|         | NPM1     | 4869   |                             |         |
|         | NUF2     | 83540  |                             |         |
|         | NUPR1    | 26471  |                             |         |
|         | ORC2     | 4999   |                             |         |
|         | OTUB1    | 55611  |                             |         |
|         | PAK1     | 5058   |                             |         |
|         | PARP1    | 142    |                             |         |

|  |          |       |  |  |
|--|----------|-------|--|--|
|  | PMS2     | 5395  |  |  |
|  | POLR2A   | 5430  |  |  |
|  | PPP1CC   | 5501  |  |  |
|  | PRC1     | 9055  |  |  |
|  | PSMA1    | 5682  |  |  |
|  | PSMA2    | 5683  |  |  |
|  | PSMA3    | 5684  |  |  |
|  | PSMA4    | 5685  |  |  |
|  | PSMA5    | 5686  |  |  |
|  | PSMA6    | 5687  |  |  |
|  | PSMA7    | 5688  |  |  |
|  | PSMB1    | 5689  |  |  |
|  | PSMB3    | 5691  |  |  |
|  | PSMB4    | 5692  |  |  |
|  | PSMC2    | 5701  |  |  |
|  | PTEN     | 5728  |  |  |
|  | RAE1     | 8480  |  |  |
|  | RARA     | 5914  |  |  |
|  | RASSF1   | 11186 |  |  |
|  | REST     | 5978  |  |  |
|  | RRM1     | 6240  |  |  |
|  | RRM2B    | 50484 |  |  |
|  | RUNX1    | 861   |  |  |
|  | SATB1    | 6304  |  |  |
|  | SEPT9    | 10801 |  |  |
|  | SKP2     | 6502  |  |  |
|  | SMAD2    | 4087  |  |  |
|  | SMAD4    | 4089  |  |  |
|  | SMAD7    | 4092  |  |  |
|  | SMARCA2  | 6595  |  |  |
|  | SMC2     | 10592 |  |  |
|  | SOX11    | 6664  |  |  |
|  | SPAG9    | 9043  |  |  |
|  | SRSF1    | 6426  |  |  |
|  | STEAP3   | 55240 |  |  |
|  | STK10    | 6793  |  |  |
|  | SUMO1    | 7341  |  |  |
|  | SUZ12    | 23512 |  |  |
|  | TAL1     | 6886  |  |  |
|  | TERF1    | 7013  |  |  |
|  | TERT     | 7015  |  |  |
|  | TOPBP1   | 11073 |  |  |
|  | TTK      | 7272  |  |  |
|  | UBE2S    | 27338 |  |  |
|  | UHRF1BP1 | 54887 |  |  |
|  | USP28    | 57646 |  |  |
|  | USP9X    | 8239  |  |  |

|  |         |       |  |  |
|--|---------|-------|--|--|
|  | WDHD1   | 11169 |  |  |
|  | WEE1    | 7465  |  |  |
|  | YAP1    | 10413 |  |  |
|  | YY1     | 7528  |  |  |
|  | ZBED6   | 1E+08 |  |  |
|  | ZNF24   | 7572  |  |  |
|  | ZNF622  | 90441 |  |  |
|  | ZWINT   | 11130 |  |  |
|  | ARNT    | 405   |  |  |
|  | BACH1   | 571   |  |  |
|  | BCL6    | 604   |  |  |
|  | BHLHE41 | 79365 |  |  |
|  | BMPR1A  | 657   |  |  |
|  | CDKN2A  | 1029  |  |  |
|  | CEBPB   | 1051  |  |  |
|  | CITED2  | 10370 |  |  |
|  | CLTC    | 1213  |  |  |
|  | CTNNB1  | 1499  |  |  |
|  | CXCR3   | 2833  |  |  |
|  | DNAJB6  | 10049 |  |  |
|  | ELF3    | 1999  |  |  |
|  | ELK1    | 2002  |  |  |
|  | EPAS1   | 2034  |  |  |
|  | ERG     | 2078  |  |  |
|  | ETS1    | 2113  |  |  |
|  | ETS2    | 2114  |  |  |
|  | FOSL1   | 8061  |  |  |
|  | FOXA1   | 3169  |  |  |
|  | FZD6    | 8323  |  |  |
|  | GATA2   | 2624  |  |  |
|  | GLI1    | 2735  |  |  |
|  | GLI2    | 2736  |  |  |
|  | GRN     | 2896  |  |  |
|  | HDAC3   | 8841  |  |  |
|  | HEXIM1  | 10614 |  |  |
|  | HIF1A   | 3091  |  |  |
|  | HNRNPK  | 3190  |  |  |
|  | IFI16   | 3428  |  |  |
|  | IRF1    | 3659  |  |  |
|  | IRF3    | 3661  |  |  |
|  | IRF7    | 3665  |  |  |
|  | IRF9    | 10379 |  |  |
|  | JUNB    | 3726  |  |  |
|  | JUND    | 3727  |  |  |
|  | KEAP1   | 9817  |  |  |
|  | LANCL1  | 10314 |  |  |
|  | LONP1   | 9361  |  |  |

|  |         |          |  |  |
|--|---------|----------|--|--|
|  | NANOG   | 79923    |  |  |
|  | NF1     | 4763     |  |  |
|  | NFE2L2  | 4780     |  |  |
|  | NFYA    | 4800     |  |  |
|  | NFYB    | 4801     |  |  |
|  | NR3C1   | 2908     |  |  |
|  | OCLN    | 1.01E+08 |  |  |
|  | PGR     | 5241     |  |  |
|  | PIAS3   | 10401    |  |  |
|  | POU5F1  | 5460     |  |  |
|  | PRDM5   | 11107    |  |  |
|  | PRMT5   | 10419    |  |  |
|  | RBPJ    | 3516     |  |  |
|  | RORC    | 6097     |  |  |
|  | RUNX2   | 860      |  |  |
|  | S100A4  | 6275     |  |  |
|  | S100PBP | 64766    |  |  |
|  | SMARCA4 | 6597     |  |  |
|  | SMARCD3 | 6604     |  |  |
|  | SOX2    | 6657     |  |  |
|  | SP100   | 6672     |  |  |
|  | SP3     | 6670     |  |  |
|  | SRA1    | 10011    |  |  |
|  | SREBF1  | 6720     |  |  |
|  | STAT1   | 6772     |  |  |
|  | STAT2   | 6773     |  |  |
|  | STAT6   | 6778     |  |  |
|  | T       | 6862     |  |  |
|  | TCF12   | 6938     |  |  |
|  | TCF7L2  | 6934     |  |  |
|  | TFRC    | 7037     |  |  |
|  | THRB    | 7068     |  |  |
|  | TNFSF9  | 8744     |  |  |
|  | TPX2    | 22974    |  |  |
|  | TWIST1  | 7291     |  |  |
|  | TYROBP  | 7305     |  |  |
|  | USF1    | 7391     |  |  |
|  | WNT5A   | 7474     |  |  |
|  | YWHAZ   | 7534     |  |  |
|  | ZNF217  | 7764     |  |  |
|  | CBX5    | 23468    |  |  |
|  | CCND1   | 595      |  |  |
|  | ESR1    | 2099     |  |  |
|  | ESR2    | 2100     |  |  |
|  | EZH2    | 2146     |  |  |
|  | FOXO3   | 2309     |  |  |
|  | MYC     | 4609     |  |  |



|  |         |        |  |  |
|--|---------|--------|--|--|
|  | SMAD3   | 4088   |  |  |
|  | STAT3   | 6774   |  |  |
|  | STAT5A  | 6776   |  |  |
|  | TP53    | 7157   |  |  |
|  | TP63    | 8626   |  |  |
|  | WT1     | 7490   |  |  |
|  | ADAMTS7 | 11173  |  |  |
|  | AKAP12  | 9590   |  |  |
|  | ANAPC2  | 29882  |  |  |
|  | ANAPC7  | 51434  |  |  |
|  | APC     | 324    |  |  |
|  | AR      | 367    |  |  |
|  | ARX     | 170302 |  |  |
|  | ATF6    | 22926  |  |  |
|  | ATRX    | 546    |  |  |
|  | AURKA   | 6790   |  |  |
|  | AURKB   | 9212   |  |  |
|  | BARD1   | 580    |  |  |
|  | BCL2    | 596    |  |  |
|  | BCL2L1  | 598    |  |  |
|  | BCL2L14 | 79370  |  |  |
|  | BIRC5   | 332    |  |  |
|  | BRCA2   | 675    |  |  |
|  | CCL1    | 6346   |  |  |
|  | CCNA1   | 8900   |  |  |
|  | CCNA2   | 890    |  |  |
|  | CD44    | 960    |  |  |
|  | CDC14A  | 8556   |  |  |
|  | CDC25B  | 994    |  |  |
|  | CDC25C  | 995    |  |  |
|  | CEP170  | 9859   |  |  |
|  | CHEK1   | 1111   |  |  |
|  | CHUK    | 1147   |  |  |
|  | CUEDC2  | 79004  |  |  |
|  | CUL1    | 8454   |  |  |
|  | CYLD    | 1540   |  |  |
|  | DAXX    | 1616   |  |  |
|  | DSN1    | 79980  |  |  |
|  | DUSP1   | 1843   |  |  |
|  | EGFR    | 1956   |  |  |
|  | EIF4B   | 1975   |  |  |
|  | EPOR    | 2057   |  |  |
|  | ERCC6L  | 54821  |  |  |
|  | ETV1    | 2115   |  |  |
|  | FBXL14  | 144699 |  |  |
|  | FOXO1   | 2308   |  |  |
|  | HAT1    | 8520   |  |  |

|               |                   |        |  |  |
|---------------|-------------------|--------|--|--|
|               | HAUS8             | 93323  |  |  |
|               | HDAC2             | 3066   |  |  |
|               | HFE               | 3077   |  |  |
|               | HNF4A             | 3172   |  |  |
|               | HSPA8             | 3312   |  |  |
|               | IPO4              | 79711  |  |  |
|               | IRF4              | 3662   |  |  |
|               | ITGA2             | 3673   |  |  |
|               | ITGB1             | 3688   |  |  |
|               | KAT5              | 10524  |  |  |
|               | KDM5B             | 10765  |  |  |
|               | KIF23             | 9493   |  |  |
|               | KIFC1             | 3833   |  |  |
|               | KLF4              | 9314   |  |  |
|               | KMT2E             | 55904  |  |  |
|               | LIN37             | 55957  |  |  |
|               | LIN9              | 286826 |  |  |
|               | LRRK2             | 120892 |  |  |
|               | MAPK10            | 5602   |  |  |
|               | MAPK8             | 5599   |  |  |
|               | MAVS              | 57506  |  |  |
|               | MCM7              | 4176   |  |  |
|               | MDM2              | 4193   |  |  |
|               | MITF              | 4286   |  |  |
|               | MMP25             | 64386  |  |  |
|               | NASP              | 4678   |  |  |
|               | NEUROG1           | 4762   |  |  |
|               | NFKBIA            | 4792   |  |  |
|               | ODF2              | 4957   |  |  |
|               | PIN1              | 5300   |  |  |
|               | PLEKHG6           | 55200  |  |  |
|               | PRKDC             | 5591   |  |  |
|               | RAF1              | 5894   |  |  |
|               | RBBP4             | 5928   |  |  |
|               | SIN3B             | 23309  |  |  |
|               | SP1               | 6667   |  |  |
|               | SPC25             | 57405  |  |  |
|               | TIAL1             | 7073   |  |  |
|               | XRCC5             | 7520   |  |  |
|               | XRCC6             | 2547   |  |  |
| Ap1 complex   | FOS               | 2353   |  |  |
| Ap1 complex   | JUN               | 3725   |  |  |
| Cpla2 complex | PLA2G4A           | 5321   |  |  |
| Cpla2 complex | JMJD7-<br>PLA2G4B | 8681   |  |  |

|               |          |        |  |  |
|---------------|----------|--------|--|--|
| Cpla2 complex | PLA2G10  | 8399   |  |  |
| Cpla2 complex | PLA2G12A | 81579  |  |  |
| Cpla2 complex | PLA2G12B | 84647  |  |  |
| Cpla2 complex | PLA2G1B  | 5319   |  |  |
| Cpla2 complex | PLA2G2A  | 5320   |  |  |
| Cpla2 complex | PLA2G2D  | 26279  |  |  |
| Cpla2 complex | PLA2G2E  | 30814  |  |  |
| Cpla2 complex | PLA2G2F  | 64600  |  |  |
| Cpla2 complex | PLA2G3   | 50487  |  |  |
| Cpla2 complex | PLA2G4B  | 1E+08  |  |  |
| Cpla2 complex | PLA2G4C  | 8605   |  |  |
| Cpla2 complex | PLA2G4D  | 283748 |  |  |
| Cpla2 complex | PLA2G4E  | 123745 |  |  |
| Cpla2 complex | PLA2G4F  | 255189 |  |  |
| Cpla2 complex | PLA2G5   | 5322   |  |  |
| Cpla2 complex | PLA2G6   | 8398   |  |  |
| Creb complex  | ATF2     | 1386   |  |  |
| Creb complex  | ATF4     | 468    |  |  |
| Creb complex  | CREB3    | 10488  |  |  |
| Creb complex  | CREB3L3  | 84699  |  |  |
| Creb complex  | CREB3L4  | 148327 |  |  |
| Creb complex  | CREB5    | 9586   |  |  |
| Creb complex  | CREB1    | 1385   |  |  |
| Creb complex  | CREBBP   | 1387   |  |  |
| Creb complex  | EP300    | 2033   |  |  |
| Cyclin E      | CCNE1    | 898    |  |  |
| Cyclin E      | CCNE2    | 9134   |  |  |
| E2f           | E2F1     | 1869   |  |  |
| E2f           | E2F2     | 1870   |  |  |
| E2f           | E2F3     | 1871   |  |  |
| E2f           | E2F4     | 1874   |  |  |

|                |          |        |  |  |
|----------------|----------|--------|--|--|
| E2f            | E2F5     | 1875   |  |  |
| E2f            | E2F6     | 1876   |  |  |
| E2f            | E2F7     | 144455 |  |  |
| E2f            | E2F8     | 79733  |  |  |
| ERK1/2         | MAPK1    | 5594   |  |  |
| ERK1/2         | MAPK3    | 5595   |  |  |
| Histone h3     | H3F3A    | 3020   |  |  |
| Histone h3     | H3F3B    | 3021   |  |  |
| Histone h3     | HIST1H3C | 8352   |  |  |
| Histone h3     | HIST2H3C | 126961 |  |  |
| Histone h3     | HIST3H3  | 8290   |  |  |
| Histone h4     | HIST1H4J | 8363   |  |  |
| Hsp90          | HSP90AA1 | 3320   |  |  |
| Hsp90          | HSP90B1  | 7184   |  |  |
| Hsp90          | HSP90AB1 | 3326   |  |  |
| N-cor          | NCOR2    | 9612   |  |  |
| N-cor          | NCOR1    | 9611   |  |  |
| NFkB (complex) | NFKB1    | 4790   |  |  |
| NFkB (complex) | RELA     | 5970   |  |  |
| NFkB (complex) | NFKB2    | 4791   |  |  |
| NFkB (complex) | REL      | 5966   |  |  |
| NFkB (complex) | RELB     | 5971   |  |  |
| Rb             | RBL1     | 5933   |  |  |
| Rb             | RBL2     | 5934   |  |  |
| Rb             | RB1      | 5925   |  |  |
| Smad1/5/8      | SMAD1    | 4086   |  |  |
| Smad1/5/8      | SMAD5    | 4090   |  |  |
| Smad1/5/8      | SMAD9    | 4093   |  |  |
| Top2           | PTPMT1   | 114971 |  |  |
| Top2           | TOP2A    | 7153   |  |  |
| Top2           | TOP2B    | 7155   |  |  |

Supplementary Table 8c. Causal network genes associated with cluster 1 genes along with their association with CIN or TME and hypoxia responsiveness

| Complex | Upstream causal gene | Entrez Gene ID | Interacts with CIN/TME/Both | Hypoxia Response |
|---------|----------------------|----------------|-----------------------------|------------------|
|         | CD24                 | 100133941      |                             |                  |
|         | CDKN1A               | 1026           |                             |                  |
|         | DDR2                 | 4921           |                             |                  |
|         | ETV1                 | 2115           |                             |                  |
|         | IRF4                 | 3662           |                             |                  |
|         | KDM5B                | 10765          |                             |                  |
|         | LILRB4               | 11006          |                             |                  |
|         | NAMPT                | 10135          |                             |                  |
|         | PTGS2                | 5743           |                             |                  |
|         | RAC1                 | 5879           |                             |                  |
|         | RUNX2                | 860            |                             |                  |
|         | SUMO3                | 6612           |                             |                  |
|         | ACVR1                | 90             |                             |                  |
|         | ARX                  | 170302         |                             |                  |
|         | DPAGT1               | 1798           |                             |                  |
|         | FAS                  | 355            |                             |                  |
|         | GBP1                 | 2633           |                             |                  |
|         | GPX4                 | 2879           |                             |                  |
|         | HFE                  | 3077           |                             |                  |
|         | HIF1AN               | 55662          |                             |                  |
|         | HNF4A                | 3172           |                             |                  |
|         | IFNL4                | 101180976      |                             |                  |
|         | IL11                 | 3589           |                             |                  |
|         | IL18                 | 3606           |                             |                  |
|         | LAMA3                | 3909           |                             |                  |
|         | RARRES3              | 5920           |                             |                  |
|         | S100A9               | 6280           |                             |                  |
|         | SAFB                 | 6294           |                             |                  |
|         | SDR9C7               | 121214         |                             |                  |
|         | TBK1                 | 29110          |                             |                  |
|         | TIAL1                | 7073           |                             |                  |
|         | TICAM1               | 148022         |                             |                  |
|         | ATF6                 | 22926          |                             |                  |
|         | ERBB2                | 2064           |                             |                  |
|         | MITF                 | 4286           |                             |                  |
|         | SP1                  | 6667           |                             |                  |
|         | TRAF2                | 7186           |                             |                  |
|         | BSG                  | 682            |                             |                  |
|         | FOXO1                | 2308           |                             |                  |
|         | HDAC2                | 3066           |                             |                  |
|         | RABL6                | 55684          |                             |                  |
|         | RAF1                 | 5894           |                             |                  |
|         | E2F6                 | 1876           |                             |                  |

|              |        |        |  |  |
|--------------|--------|--------|--|--|
|              | MDM2   | 4193   |  |  |
|              | OGT    | 8473   |  |  |
|              | SEL1L  | 6400   |  |  |
|              | AR     | 367    |  |  |
|              | AREG   | 374    |  |  |
|              | BTRC   | 8945   |  |  |
|              | DVL2   | 1856   |  |  |
|              | FOXM1  |        |  |  |
|              | NELFE  | 7936   |  |  |
|              | NUPR1  | 26471  |  |  |
|              | PPP2CB | 5516   |  |  |
|              | REST   | 5978   |  |  |
|              | SVIL   | 6840   |  |  |
| E2f complex  | E2F3   | 1871   |  |  |
| E2f complex  | E2F4   | 1874   |  |  |
| E2f complex  | E2F1   | 1869   |  |  |
| E2f complex  | E2F2   | 1870   |  |  |
| E2f complex  | E2F5   | 1875   |  |  |
| E2f complex  | E2F7   | 144455 |  |  |
| E2f complex  | E2F8   | 79733  |  |  |
| IL1 complex  | IL1A   | 3552   |  |  |
| IL1 complex  | IL1RN  | 3557   |  |  |
| IL1 complex  | IL33   | 90865  |  |  |
| IL1 complex  | IL36G  | 56300  |  |  |
| IL1 complex  | IL1B   | 3553   |  |  |
| IL1 complex  | IL1F10 | 84639  |  |  |
| IL1 complex  | IL36A  | 27179  |  |  |
| IL1 complex  | IL36B  | 27177  |  |  |
| IL1 complex  | IL36RN | 26525  |  |  |
| IL1 complex  | IL37   | 27178  |  |  |
| Jnk complex  | MAP2K4 | 6416   |  |  |
| Jnk complex  | MAPK10 | 5602   |  |  |
| Jnk complex  | MAPK12 | 6300   |  |  |
| Jnk complex  | MAPK8  | 5599   |  |  |
| Jnk complex  | MAPK9  | 5601   |  |  |
| NFkB complex | NFKB1  | 4790   |  |  |
| NFkB complex | NFKB2  | 4791   |  |  |
| NFkB complex | REL    | 5966   |  |  |
| NFkB complex | RELA   | 5970   |  |  |
| NFkB complex | RELB   | 5971   |  |  |
| PLC complex  | PLCB4  | 5332   |  |  |
| PLC complex  | PLCE1  | 51196  |  |  |
| PLC complex  | PLCL1  | 5334   |  |  |
| PLC complex  | PLCL2  | 23228  |  |  |
| PLC complex  | NOTUM  | 147111 |  |  |
| PLC complex  | PDIA3  | 2923   |  |  |
| PLC complex  | PLCB1  | 23236  |  |  |

|             |       |        |  |  |
|-------------|-------|--------|--|--|
| PLC complex | PLCB2 | 5330   |  |  |
| PLC complex | PLCB3 | 5331   |  |  |
| PLC complex | PLCD1 | 5333   |  |  |
| PLC complex | PLCD3 | 113026 |  |  |
| PLC complex | PLCD4 | 84812  |  |  |
| PLC complex | PLCG1 | 5335   |  |  |
| PLC complex | PLCG2 | 5336   |  |  |
| PLC complex | PLCH1 | 23007  |  |  |
| PLC complex | PLCH2 | 9651   |  |  |
| PLC complex | PLCZ1 | 89869  |  |  |
| Ras complex | KRAS  | 3845   |  |  |
| Ras complex | RRAS2 | 22800  |  |  |
| Ras complex | HRAS  | 3265   |  |  |
| Ras complex | MRAS  | 22808  |  |  |
| Ras complex | NRAS  | 4893   |  |  |
| Ras complex | RRAS  | 6237   |  |  |
| SAA complex | SAA1  | 6288   |  |  |
| SAA complex | SAA2  | 6289   |  |  |
| SAA complex | SAA3  | 6290   |  |  |
| SAA complex | SAA4  | 6291   |  |  |

Supplementary Table 9. The number of gene in each subtype and stage.

| <b>Stage/Subtype</b> | <b>ER+</b> | <b>TNBC</b> | <b>HER2 amplified</b> | <b>Overall</b> |
|----------------------|------------|-------------|-----------------------|----------------|
| Stage 1              | 143        | 29          | 2                     | 174            |
| Stage 2              | 459        | 104         | 25                    | 588            |
| Stage 3              | 201        | 25          | 11                    | 237            |
| Stage 4              | 16         | 2           | 1                     | 19             |
| Total number         | 819        | 160         | 39                    | 1018           |



## SUPPLEMENTARY TABLE LEGENDS:

**Supplementary Table 1:** Up/down-regulated genes across all stages in overall patients, TNBC patients and ER+ patients, respectively. Table 1a, and 1b show up/down -regulated genes in different tumor stages for overall and TNBC cases, respectively.

**Supplementary Table 2:** Stage-specific up/down regulated genes in at least 70% of TNBC patients. Table 2a and 2b show up and down regulated genes in at least 70% of TNBC patients in each stage, respectively, as well as the fold change, frequency and FDR information.

**Supplementary Table 3:** TNBC stage-specific differentially expressed genes in at least 70% of overall patients. Table 3a and 3b show up and down regulated genes in at least 70% of overall patients in each stage, respectively, as well as the fold change, frequency and FDR information.

**Supplementary Table 4:** Identified amplified regions. Table 4 shows the identified chromosomal amplification regions.

**Supplementary Table 5:** Evaluations on the concordances between gene expression and copy number amplification for up-regulated genes on amplified regions. Table 5a and 5b show Pearson's correlation coefficient between gene expression and CNA, and fold CNA-associated change with FDR, and cytoband for up-regulated genes in overall and TNBC patients, respectively.

**Supplementary Table 6:** EEA genes in overall and TNBC patients. Table 6a and 6b show EEA genes in overall and TNBC patients, respectively.

**Supplementary Table 7:** Gene lists in four clusters. Table 7a, 7b, 7c and 7d show genes in cluster 1, 2, 3 and 4, respectively.

**Supplementary Table 8:** Analyses of cluster 1 genes and its interactions. Table 8a lists the cluster 1 genes and their association with CIN or TME. Table 8b and 8c enlist the upstream regulator and causal network genes respectively, along with their association with CIN or TME and hypoxia responsiveness.

**Supplementary Table 9:** The number of genes in each tumor stage and subtype. Table 9 shows the number of ER+, HER2+, TNBC, and overall patients in different stages.
